# Supplementary material for: Cinchonidine thiourea catalyzed asymmetric addition of phenols to oxindole derivatives
Source: Royal Society of Chemistry journal article supplement (doi:10.1039/c4ra09805f), 2014-01-01

*Supporting Information*

**Cinchonidine Thiourea Catalyzed Asymmetric Addition of Phenols to Oxindole Derivatives**

Jasneet Kaur, Akshay Kumar and Swapandeep Singh Chimni\*

Department of Chemistry, U.G.C. Centre of Advance Studies in Chemistry, Guru Nanak Dev University, Amritsar, 143005, India,

Fax: (+)91-183-2258820

E-mail: [sschimni@yahoo.com](mailto:sschimni@yahoo.com), [sschimni.chem@gndu.ac.in](mailto:sschimni.chem@gndu.ac.in)

**Table of content**

|                                                        |        |
|--------------------------------------------------------|--------|
| 1) General Methods and Materials.....                  | 2      |
| 2) Experimental details and characterization data..... | 3      |
| (a) Crystal data for enantiopure product.....          | 4-5    |
| (b) Catalyst data.....                                 | 6-11   |
| (c) HPLC chromatograms.....                            | 12-37  |
| (d) NMR spectra.....                                   | 38-107 |

## **1) General Methods and Materials.**

### **(A) General Methods:**

All reactions were performed in oven-dried glassware. All solvents and commercially available chemical were used without further purification. The molecular sieves were activated at 200 °C for 2 hours in an oven. The column chromatography was carried out on a column packed with silica gel 60-120 using mixtures of hexane and ethyl acetate as an eluents. <sup>1</sup>H NMR spectra were recorded in CDCl<sub>3</sub> on a BRUKER AVANCE III (500 MHz), JNM-ECS400 (400 MHz), BRUKER AVANCE II (400 MHz) and JEOL (300 MHz) spectrometer. <sup>13</sup>C NMR spectra were recorded in CDCl<sub>3</sub> on BRUKER AVANCE III (125 MHz), JNM-ECS400 (100 MHz), BRUKER AVANCE II (100 MHz) and JEOL (75 MHz). Chemical shifts (δ) are expressed in ppm downfield from internal TMS. MS were recorded on micrOTOF-Q II 10356 Mass Spectrometer. Optical rotation was determined with AUTOPOL IV polarimeter at 25 °C using sodium D light. Enantiomeric excess was determined by using Shimadzu LC-20AD using Daicel Chiralpak IA, IB and IC column.

### **(B) Material:**

Catalysts **1a**, **1b**, **2a** and **2b** were purchased from Sigma Aldrich. The catalysts **1c**, **1d**, **2c**, **2d**, **3a**, **3b**, **4a**, **4b**, **6a** and **6b** were synthesized by the procedures reported in literature.<sup>1</sup> The catalyst **5** was synthesized by the reported procedure by S. Mukherjee and et al.<sup>2</sup> The catalyst **7** and **8** was prepared according to our previously reported method.<sup>3</sup> Isatins were commercially available from Spectrochem, India. The *N*-methyl, *N*-allyl or *N*-benzyl protected isatins were prepared according to the literature method.<sup>4</sup>

---

<sup>1</sup> (a) Li, H.; Wang, Y.; Tang, L.; Deng, L. *J. Am. Chem. Soc.* **2004**, *126*, 9906. (b) Li, H.; Wang, B.; Deng, L. *J. Am. Chem. Soc.* **2006**, *128*, 732. (c) Wang, Y.; Liu, X.; Deng, L. *J. Am. Chem. Soc.* **2006**, *128*, 3928. (d) Iwabuchi, Y.; Nakatani, M.; Yokoyama, N.; Hatakeyama S. *J. Am. Chem. Soc.* **1998**, *121*, 10219. (e) Vakulya, V.; Varga, S.; Csámpai, A.; Soos, T. *Org. Lett.* **2005**, *7*, 1967.

<sup>2</sup> Manna, M.S.; Kumar, V.; Mukherjee, S. *Chem. Commun.*, **2012**, *48*, 5193.

<sup>3</sup> (a) Kumar, A.; Singh, S.; Kumar, V.; Chimni, S. S. *Org. Biomol. Chem.* **2011**, *9*, 2731. (b) Kaur, J.; Kumar, A.; Chimni, S.S. *Tetrahedron Lett.* **2014**, *55*, 2138.

## 2) Experimental details and characterization data.

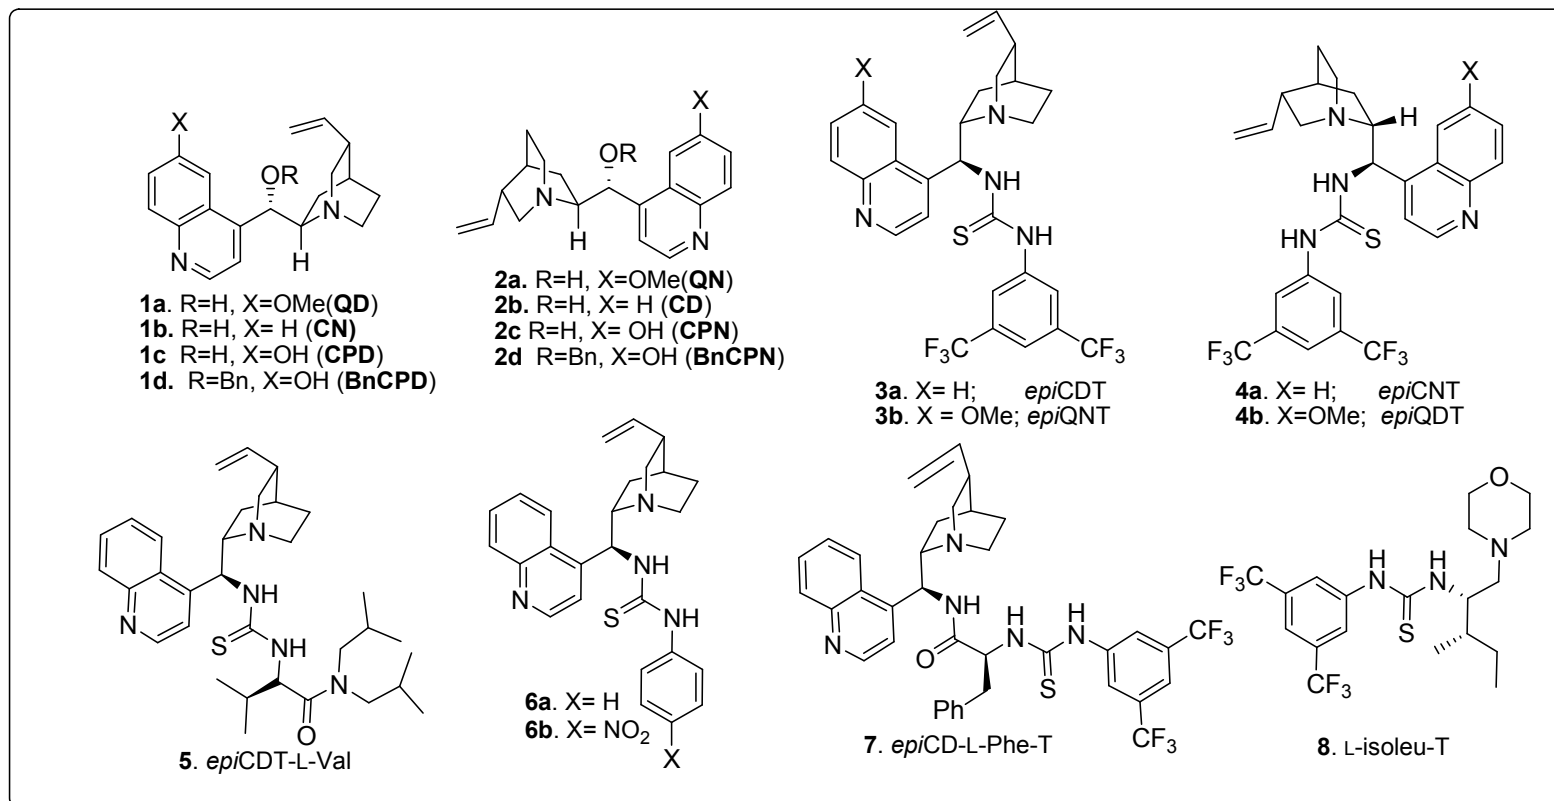

Structure of organocatalysts used

## (3) Crystal data for enantiopure product (11a)

<sup>4</sup> Overman L. E., Peterson E. A., *Tetrahedron*, **2003**, 59, 6905.

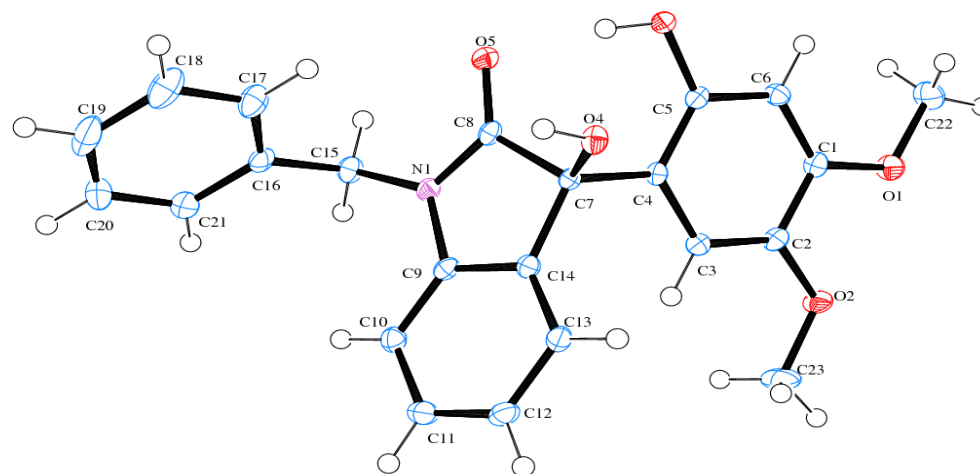

|                         |                    |
|-------------------------|--------------------|
| <b>Chemical formula</b> | $C_{23}H_{21}NO_5$ |
| <b>Formula Mass</b>     | 391.41             |
| <b>Crystal system</b>   | Monoclinic         |
| <b>Colour</b>           | Colourless         |
| <b>a/Å</b>              | 8.4183(14)         |
| <b>b/Å</b>              | 12.2957(19)        |
| <b>c/Å</b>              | 9.3671(16)         |

|                                                     |           |
|-----------------------------------------------------|-----------|
| $\alpha/^\circ$                                     | 90.00     |
| $\beta/^\circ$                                      | 97.016(6) |
| $\gamma/^\circ$                                     | 90.00     |
| <b>Unit cell volume/Å<sup>3</sup></b>               | 962.3(3)  |
| <b>Temperature/K</b>                                | 100(2)    |
| <b>Space group</b>                                  | P 21      |
| <b>No. of formula units per unit cell, Z</b>        | 2         |
| <b>No. of reflections measured</b>                  | 6247      |
| <b>Final <math>R_I</math> values (all data)</b>     | 0.0379    |
| <b>Final <math>wR(F^2)</math> values (all data)</b> | 0.0965    |
| <b>Goodness of fit on <math>F^2</math></b>          | 1.020     |
| <b>Flack parameter</b>                              | 0.4(7)    |
| <b>CCDC number</b>                                  | 1022904   |

**Cupreidine (CPD) (1c)**

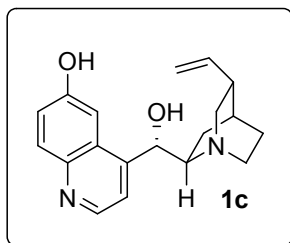

White Solid, mp: 130-140 °C , 90% yield,  $[\alpha]_D^{25} = +240.0$  (c 1.0 EtOH);  $^1\text{H NMR}$  (500 MHz,  $\text{CDCl}_3$ )  $\delta$  8.65 (d,  $J = 5.0$  Hz, 1H), 7.94-8.02 (m, 1H), 7.60 (d,  $J = 5.0$  Hz, 1H), 7.28-7.42 (m, 2H), 6.07 (d,  $J = 5.0$  Hz, 2H), 5.02-5.08 (m, 2H), 3.83-3.87 (m, 1H), 2.64-3.05 (m, 2H), 2.17-2.35 (m, 3H), 1.72 (s, 1H), 0.27-1.40 (m, 2H), 0.82-0.91 (m, 1H);  $^{13}\text{C}$  (125 MHz,  $\text{CDCl}_3$ )  $\delta$  18.38, 25.44, 27.97, 36.51, 39.40, 49.21, 59.29, 70.34, 103.8, 155.4, 117.6, 123.3, 126.5, 131.6, 139.6, 143.0, 146.4, 146.7, 157.8.

#### 9-O-Benzylcupreidine (BnCPD) (1d)

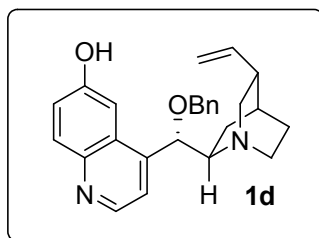

White Solid, mp: 125-127 °C , 85% yield,  $[\alpha]_D^{25} = +154.3.0$  (c 1.0  $\text{CHCl}_3$ );  $^1\text{H NMR}$  (500 MHz,  $\text{CDCl}_3$ )  $\delta$  8.76 (d,  $J = 5.0$  Hz, 1H), 8.03 (d,  $J = 10.0$  Hz, 1H), 7.28-7.46 (m, 8H), 6.83 (s, 1H), 5.77-5.83 (m, 1H), 5.01-5.09 (m, 2H), 4.76 (d,  $J = 10.0$  Hz, 1H), 4.57 (d,  $J = 10.0$  Hz, 1H), 4.15-4.18 (m, 1H), 3.26-3.75 (m, 5H), 2.42-2.62 (m, 2H), 1.81-2.03 (m, 3H), 1.26 (d,  $J = 15.0$  Hz, 2H) ;  $^{13}\text{C}$  (125 MHz,  $\text{CDCl}_3$ )  $\delta$  18.47, 23.22, 27.42, 36.98, 48.43, 49.40, 59.70, 72.06, 75.27, 103.6, 117.5, 117.8, 122.9, 126.6, 128.1, 128.3, 128.4, 128.6, 132.1, 135.8, 136.8, 139.6, 144.0, 146.6, 156.7;  $m/z$  (ESI): 401.2201 (M+1)<sup>+</sup>.

#### Cupreine (CPN) (2c)

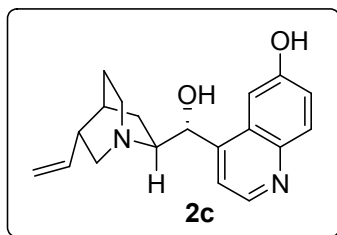

Light Brown Solid, mp: 168-170 °C, 90% yield,  $[\alpha]_D^{25} = -163.0$  (c 1.0 EtOH);  $^1\text{H NMR}$  (500 MHz,  $\text{CDCl}_3$ )  $\delta$  8.56 (d,  $J = 4.0$  Hz, 1H), 7.93 (d,  $J = 9.0$  Hz, 1H), 7.56 (d,  $J = 5.0$  Hz, 1H), 7.31-7.33 (m, 1H), 7.10 (d,  $J = 2.0$  Hz, 1H), 5.78 (s, 1H), 5.53-5.57 (m, 2H), 4.84-4.88 (m, 2H), 3.90-3.97 (m, 5H), 2.90-3.01 (m, 3H), 2.72 (s, 1H), 2.56 (s, 1H), 2.32 (s, 1H), 1.82-1.92 (m, 3H), 1.55 (d,  $J = 3.0$  Hz, 1H), 1.24 (d,  $J = 3.0$  Hz, 1H);  $^{13}\text{C}$  (125 MHz,  $\text{CDCl}_3$ )  $\delta$  14.69, 21.54, 24.22, 27.42, 38.71, 40.05, 44.22, 53.44, 53.87, 57.61, 67.39, 74.73, 89.01, 99.98, 111.1, 115.6, 118.5, 123.5, 127.3, 132.3, 141.9, 142.9, 156.9, 161.6;  $m/z$  (ESI): 311.1731 ( $\text{M}+1$ ) $^+$ .

#### 9-O-Benzylcupreine (BnCPN) (2d)

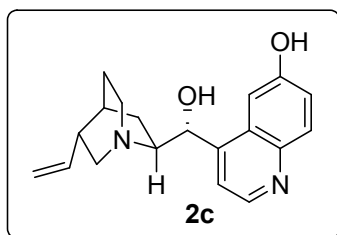

White Solid, mp: 208-210 °C, 85% yield,  $[\alpha]_D^{25} = -79.0$  (c 1.0 EtOH);  $^1\text{H NMR}$  (500 MHz,  $\text{CDCl}_3$ )  $\delta$  8.74 (d,  $J = 5.0$  Hz, 1H), 8.05 (d,  $J = 10.0$  Hz, 1H), 7.82 (d,  $J = 5.0$  Hz, 1H), 7.49 (s, 1H), 7.28-7.41 (m, 7H), 5.99 (s, 1H), 5.61-5.65 (m, 1H), 5.02-5.07 (m, 2H), 4.50-4.60 (m, 2H), 3.35-3.43 (m, 2H), 3.05 (d,  $J = 10.0$  Hz, 2H), 2.59 (s, 1H), 1.51-2.18 (m, 5H);  $^{13}\text{C}$  (75 MHz,  $\text{CDCl}_3$ )  $\delta$  23.09, 27.30, 32.70, 46.33, 50.35, 53.92, 56.31, 72.42, 105.4, 118.9, 122.3, 126.9, 131.3, 141.6, 143.1, 146.7, 156.7;  $m/z$  (ESI): 401.2204 ( $\text{M}+1$ ) $^+$ .

**1-(3,5-Bis(trifluoromethyl)phenyl)-3-(*S*)-(quinolin-4-yl)(8-vinylquinuclidin-2-yl)methyl thiourea (CDT) (3a)**

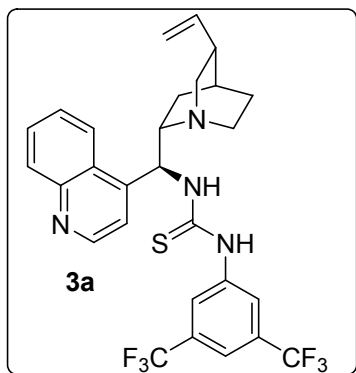

Yellow Solid, mp: 122-123 °C, 92% yield,  $[\alpha]_D^{25} = -53.7$  (c 0.37 CHCl<sub>3</sub>); <sup>1</sup>H NMR (500 MHz, CDCl<sub>3</sub>) δ 8.91 (d, J= 5.0 Hz, 1H), 8.50 (s, 1H), 8.18 (d, J= 10.0 Hz, 1H), 8.01 (s, 1H), 7.05-7.81 (m, 5H), 5.65 (d, J= 10.0 Hz, 1H), 5.05-5.08 (m, 2H), 3.00-3.72 (m, 5H), 2.54 (s, 1H), 2.33 (s, 1H), 1.89-1.97 (m, 2H), 1.52 (d, J= 15.0 Hz, 1H), 1.27 (s, 1H), 1.15 (br, s, 1H); <sup>13</sup>C (125 MHz, CDCl<sub>3</sub>) δ 24.78, 26.18, 26.98, 26.69, 38.13, 41.64, 54.63, 57.05, 116.0, 123.9, 124.4, 125.3, 126.1, 127.0, 129.2, 129.4, 130.4, 148.6, 150.3, 180.9; m/z (ESI): 565.1 (M+1)<sup>+</sup>.

**1-(3,5-bis(trifluoromethyl)phenyl)-3-((*S*)-(6-methoxyquinolin-4-yl)(8-vinylquinuclidin-2-yl)methyl)thiourea (QNT) (3b)**

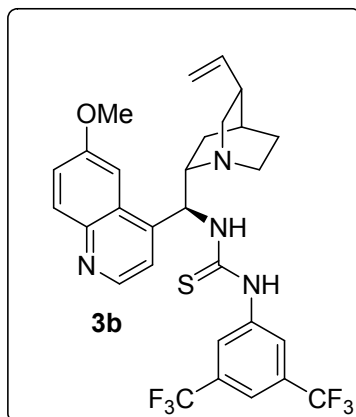



Yellow Solid, mp: 120-121 °C, 93% yield,  $[\alpha]_D^{25} = -127.0$  (c 0.5 CHCl<sub>3</sub>); <sup>1</sup>H NMR (500 MHz, CDCl<sub>3</sub>) δ 8.67 (s, 1H), 8.05-8.17 (m, 3H), 7.41-7.58 (m, 3H), 6.81 (s, 1H), 5.64-5.71 (m, 1H), 5.15-5.21 (m, 2H), 4.06 (s, 3H), 3.21-3.72 (m, 5H), 2.74 (s, 1H), 2.06-2.16 (s, 1H), 1.78 (d, J= 15.0 Hz, 1H), 0.86-1.22 (m, 3H); <sup>13</sup>C (125 MHz, CDCl<sub>3</sub>) δ 24.40, 26.67, 29.68, 36.94, 41.84, 54.13, 57.95, 64.90, 102.7, 115.2, 122.9, 127.6, 128.6, 128.7, 129.8, 131.5, 131.9, 132.1, 156.2, 179.3; HRMS calcd. for [C<sub>29</sub>H<sub>28</sub>F<sub>6</sub>N<sub>4</sub>OS]<sup>+</sup> : 594.1882; found: 594.1876.

**1-((S)-1-(diisobutylcarbamoyl)-2-methylpropyl)-3-((S)-(quinolin-4-yl)(8-vinylquinuclidin-2-yl)methyl)thiourea (5)**

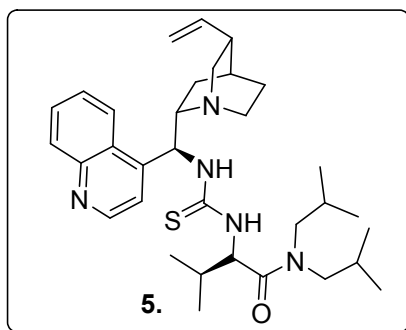

White Solid, mp: 109-110 °C, 84% yield, <sup>1</sup>H NMR (500 MHz, CDCl<sub>3</sub>) δ 8.88 (d, J= 5.0 Hz, 1H), 8.50 (d, J= 10.0 Hz, 1H), 8.13 (d, J= 10.0 Hz, 1H), 7.25-7.73 (m, 3H), 7.28 (s, 1H), 6.69 (s, 1H), 5.59-5.66 (m, 2H), 5.38 (s, 1H), 4.90-4.97 (m, 2H), 3.59 (s, 1H), 2.78-3.28 (m, 10H), 2.33 (s, 1H), 1.03-1.98 (m, 8H), 0.76-0.92 (m, 21H); <sup>13</sup>C (125 MHz, CDCl<sub>3</sub>) δ 16.23, 19.41, 19.49, 19.68, 19.75, 19.99, 20.22, 20.30, 25.23, 25.60, 26.23, 27.34, 28.02, 29.66, 31.86, 39.15, 40.76, 53.35, 55.45, 59.29, 76.82, 115.0, 123.4, 127.3, 129.5, 130.5, 140.6, 148.7, 150.2, 172.1, 181.6.

**1-phenyl-3-((S)-(quinolin-4-yl)(8-vinylquinuclidin-2-yl)methyl)thiourea (6a)**

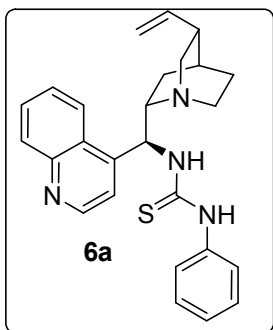

Brown Solid, mp: 125-127 °C, 90% yield, <sup>1</sup>H NMR (500 MHz, CDCl<sub>3</sub>) δ 8.85 (s, 1H), 8.54 (s, 1H), 8.15 (d, J= 10.0 Hz, 1H), 7.22-7.76 (m, 8H), 6.29 (s, 1H), 5.54-5.65 (m, 1H), 5.01-5.03 (m, 2H), 2.93-3.58 (m, 4H), 2.44 (s, 1H), 1.78-1.91 (m, 2H), 1.13-1.47 (m, 4H); <sup>13</sup>C (125 MHz, CDCl<sub>3</sub>) δ 24.78, 26.17, 26.98, 27.52, 29.70, 38.11, 41.62, 54.62, 116.1, 123.8, 124.4, 125.3, 126.1, 127.1, 129.2, 129.4, 129.6, 130.4, 148.6, 150.3, 150.7, 180.9.

**1-(4-nitrophenyl)-3-((S)-(quinolin-4-yl)(8-vinylquinuclidin-2-yl)methyl)thiourea (6b)**

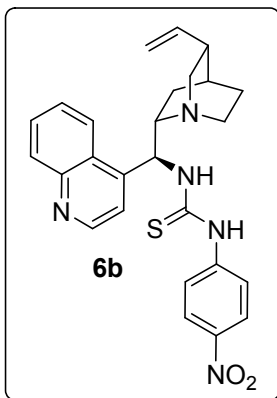

White Solid, mp: 110-112 °C, 92% yield, <sup>1</sup>H NMR (500 MHz, CDCl<sub>3</sub>) δ 8.93 (d, J=5.0 Hz, 1H), 8.50 (s, 1H), 8.12-8.17 (m, 2H), 7.28-7.79 (m, 5H), 6.63 (d, J= 10.0 Hz, 1H), 5.61-5.68 (m, 1H), 5.04-5.08 (m, 2H), 3.37-3.74 (m, 3H), 3.01-3.03 (m, 2H), 2.51 (s, 1H),

1.87-2.06 (m, 3H), 1.12-1.54 (m, 3H);  $^{13}\text{C}$  (125 MHz,  $\text{CDCl}_3$ )  $\delta$  24.62, 25.87, 26.80, 37.84, 41.88, 54.53, 61.13, 113.3, 116.4, 121.6, 123.7, 124.5, 126.5, 127.5, 129.7, 130.4, 143.5, 145.0, 148.5, 156.2, 180.5.

## HPLC chromatograms

### ==== Shimadzu LCsolution Analysis Report ====

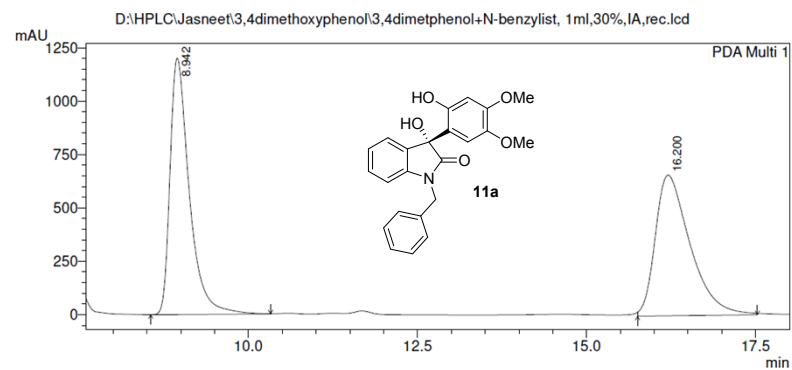

1 PDA Multi 1/254nm 4nm

PeakTable

PDA Ch1 254nm 4nm

| Peak# | Ret. Time | Area     | Height  | Area %  | Height % |
|-------|-----------|----------|---------|---------|----------|
| 1     | 8.942     | 23807734 | 1201821 | 50.202  | 64.580   |
| 2     | 16.200    | 23616113 | 659163  | 49.798  | 35.420   |
| Total |           | 47423847 | 1860984 | 100.000 | 100.000  |

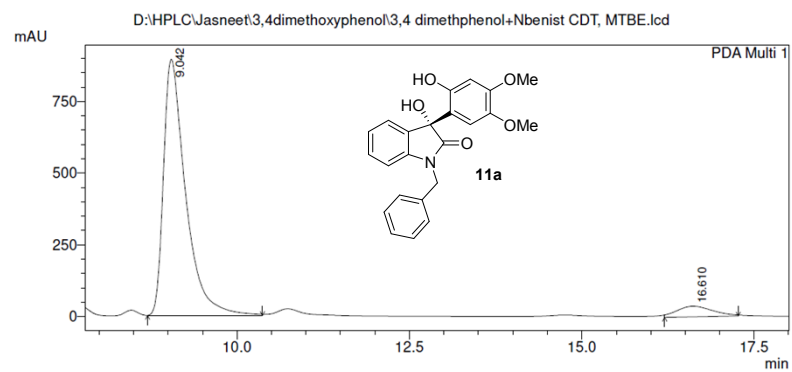

1 PDA Multi 1/254nm 4nm

PeakTable

PDA Ch1 254nm 4nm

| Peak# | Ret. Time | Area     | Height | Area %  | Height % |
|-------|-----------|----------|--------|---------|----------|
| 1     | 9.042     | 19949335 | 894002 | 93.736  | 96.028   |
| 2     | 16.610    | 1333105  | 36983  | 6.264   | 3.972    |
| Total |           | 21282440 | 930985 | 100.000 | 100.000  |

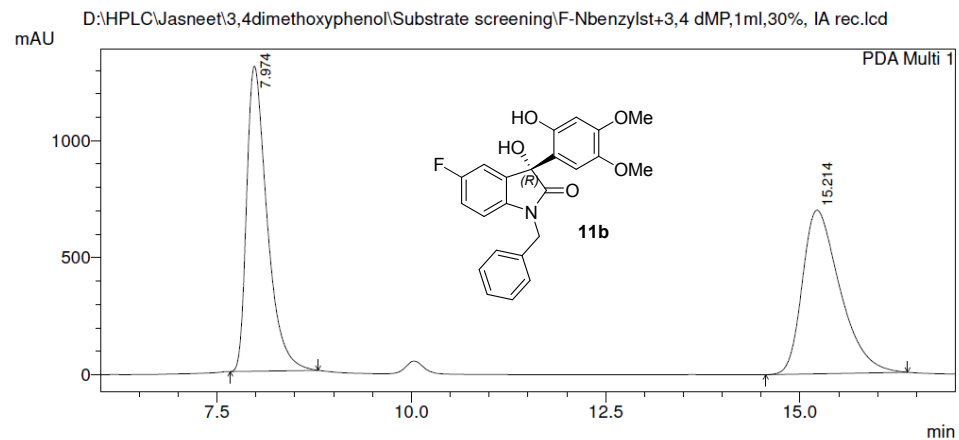

1 PDA Multi 1/254nm 4nm

PeakTable

PDA Ch1 254nm 4nm

| Peak# | Ret. Time | Area     | Height  | Area %  | Height % |
|-------|-----------|----------|---------|---------|----------|
| 1     | 7.974     | 23876611 | 1303855 | 50.340  | 65.094   |
| 2     | 15.214    | 23554483 | 699194  | 49.660  | 34.906   |
| Total |           | 47431094 | 2003048 | 100.000 | 100.000  |

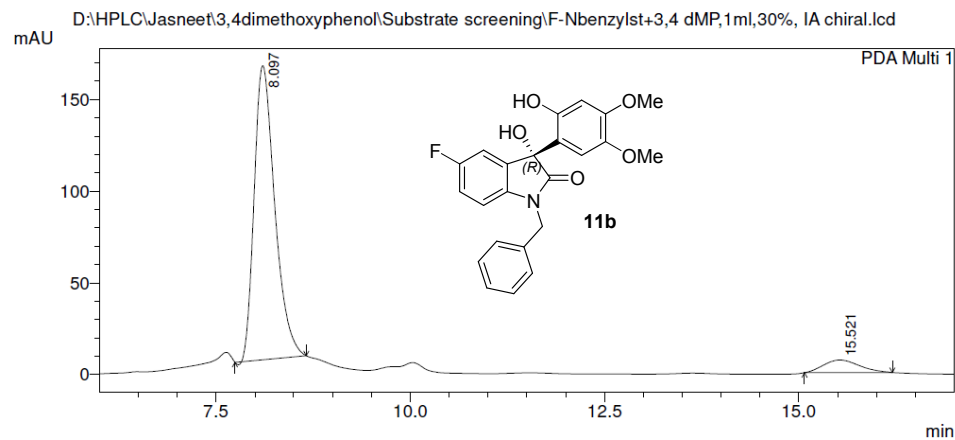

1 PDA Multi 1/254nm 4nm

PeakTable

PDA Ch1 254nm 4nm

| Peak# | Ret. Time | Area    | Height | Area %  | Height % |
|-------|-----------|---------|--------|---------|----------|
| 1     | 8.097     | 2957524 | 160303 | 93.068  | 95.900   |
| 2     | 15.521    | 220276  | 6854   | 6.932   | 4.100    |
| Total |           | 3177799 | 167157 | 100.000 | 100.000  |

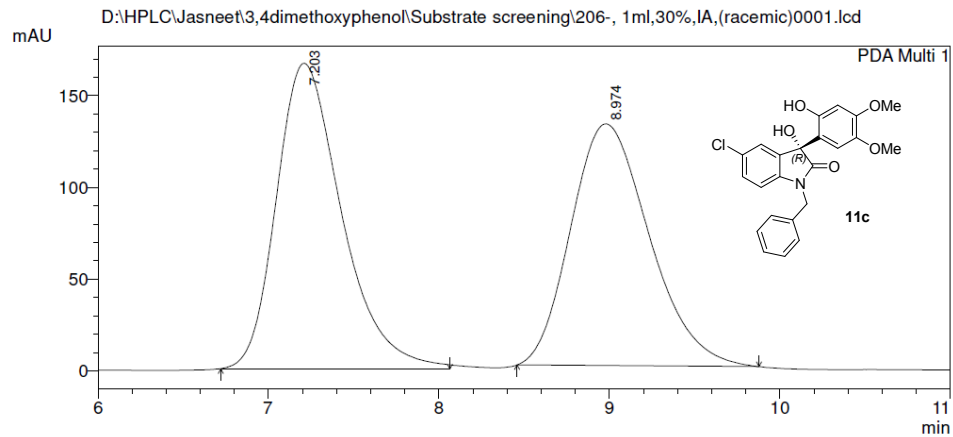

PeakTable

| Peak# | Ret. Time | Area    | Height | Area %  | Height % |
|-------|-----------|---------|--------|---------|----------|
| 1     | 7.203     | 4437178 | 166637 | 51.278  | 55.848   |
| 2     | 8.974     | 4216032 | 131739 | 48.722  | 44.152   |
| Total |           | 8653210 | 298376 | 100.000 | 100.000  |

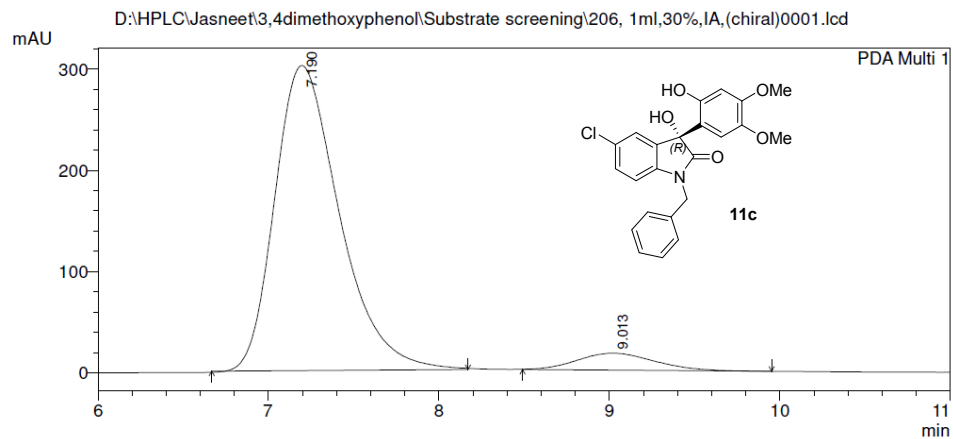

PeakTable

| Peak# | Ret. Time | Area    | Height | Area %  | Height % |
|-------|-----------|---------|--------|---------|----------|
| 1     | 7.190     | 7950834 | 301712 | 93.827  | 94.770   |
| 2     | 9.013     | 523060  | 16651  | 6.173   | 5.230    |
| Total |           | 8473895 | 318363 | 100.000 | 100.000  |

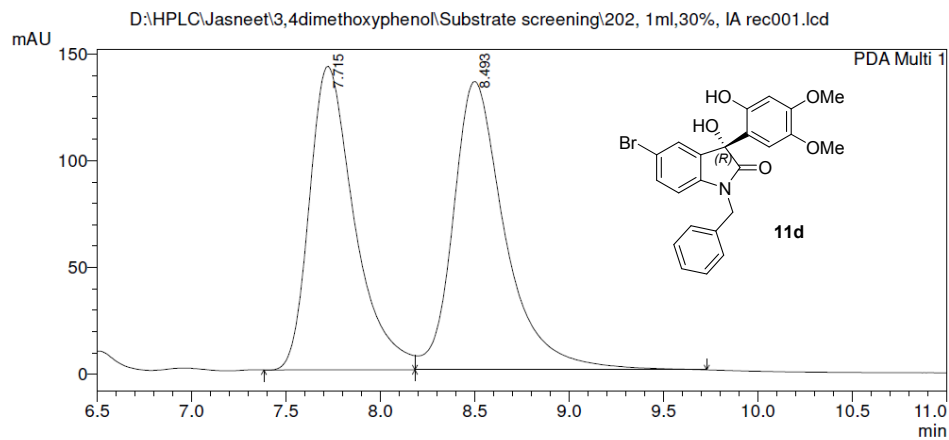

PeakTable

PDA Ch1 254nm 4nm

| Peak# | Ret. Time | Area    | Height | Area %  | Height % |
|-------|-----------|---------|--------|---------|----------|
| 1     | 7.715     | 2354799 | 142219 | 47.651  | 51.284   |
| 2     | 8.493     | 2586924 | 135098 | 52.349  | 48.716   |
| Total |           | 4941723 | 277317 | 100.000 | 100.000  |

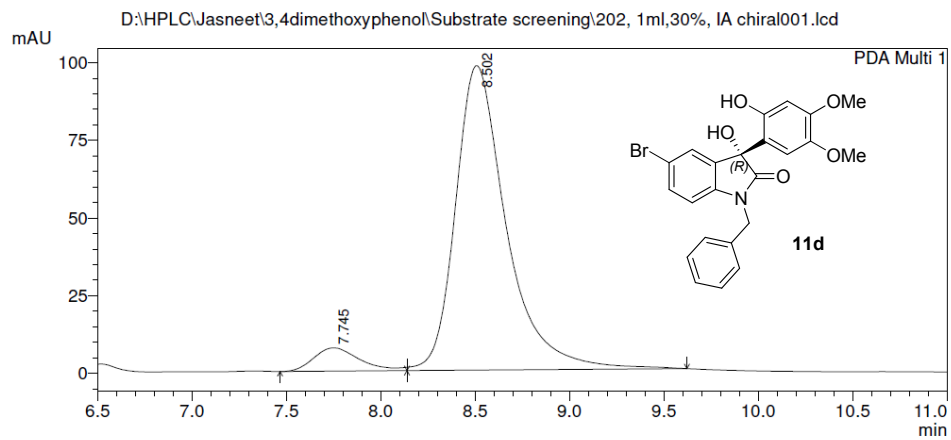

PeakTable

PDA Ch1 254nm 4nm

| Peak# | Ret. Time | Area    | Height | Area %  | Height % |
|-------|-----------|---------|--------|---------|----------|
| 1     | 7.745     | 128400  | 7530   | 6.525   | 7.137    |
| 2     | 8.502     | 1839299 | 97974  | 93.475  | 92.863   |
| Total |           | 1967699 | 105504 | 100.000 | 100.000  |

==== Shimadzu LCsolution Analysis Report ====

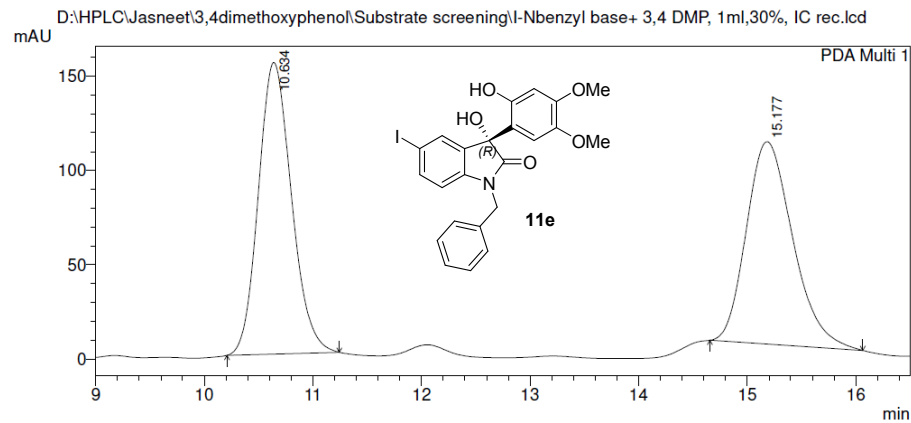

PeakTable

| Peak# | Ret. Time | Area    | Height | Area %  | Height % |
|-------|-----------|---------|--------|---------|----------|
| 1     | 10.634    | 3277769 | 154570 | 50.711  | 59.032   |
| 2     | 15.177    | 3185879 | 107272 | 49.289  | 40.968   |
| Total |           | 6463648 | 261842 | 100.000 | 100.000  |

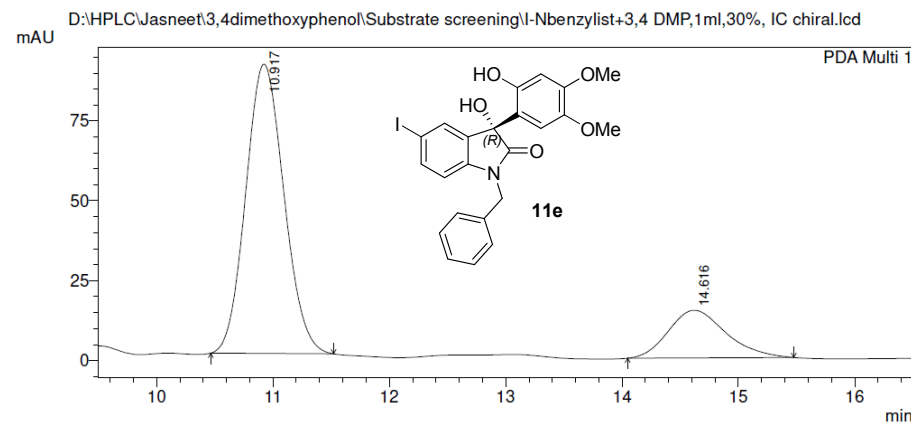

PeakTable

| Peak# | Ret. Time | Area    | Height | Area %  | Height % |
|-------|-----------|---------|--------|---------|----------|
| 1     | 10.917    | 2067832 | 90585  | 80.101  | 85.869   |
| 2     | 14.616    | 513688  | 14908  | 19.899  | 14.131   |
| Total |           | 2581521 | 105493 | 100.000 | 100.000  |



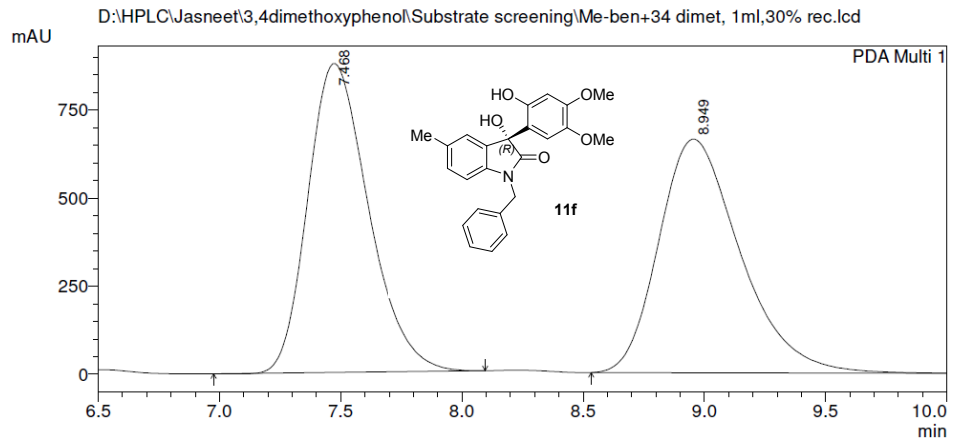

PeakTable

| Peak# | Ret. Time | Area     | Height  | Area %  | Height % |
|-------|-----------|----------|---------|---------|----------|
| 1     | 7.468     | 15304461 | 877518  | 49.694  | 56.950   |
| 2     | 8.949     | 15492955 | 663332  | 50.306  | 43.050   |
| Total |           | 30797417 | 1540850 | 100.000 | 100.000  |

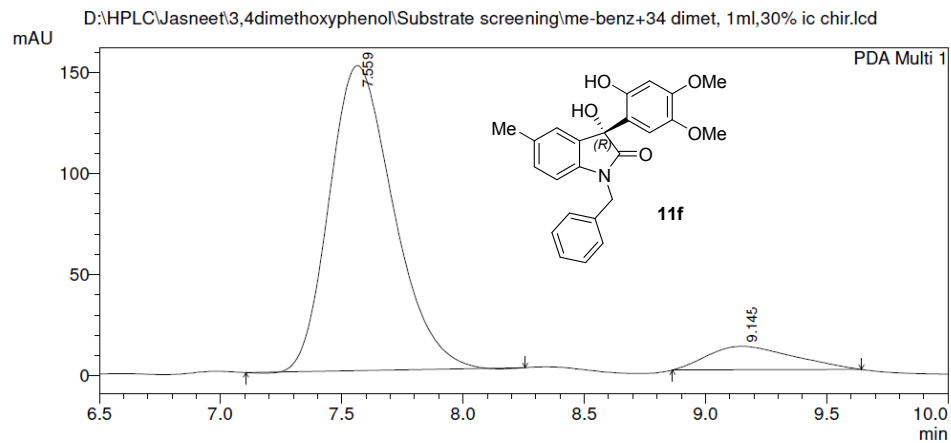

PeakTable

| Peak# | Ret. Time | Area    | Height | Area %  | Height % |
|-------|-----------|---------|--------|---------|----------|
| 1     | 7.559     | 2767603 | 150820 | 90.631  | 92.858   |
| 2     | 9.145     | 286100  | 11600  | 9.369   | 7.142    |
| Total |           | 3053703 | 162420 | 100.000 | 100.000  |

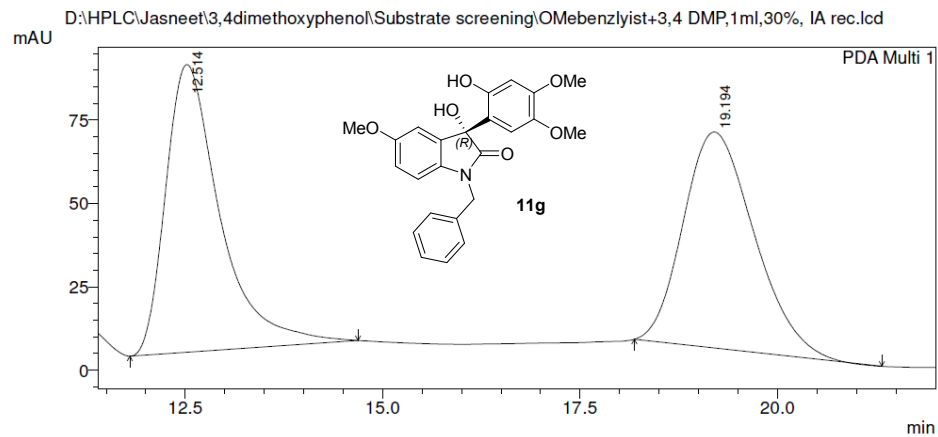

1 PDA Multi 1/254nm 4nm

PeakTable

| Peak# | Ret. Time | Area    | Height | Area %  | Height % |
|-------|-----------|---------|--------|---------|----------|
| 1     | 12.514    | 4137048 | 86274  | 50.482  | 57.139   |
| 2     | 19.194    | 4058060 | 64715  | 49.518  | 42.861   |
| Total |           | 8195109 | 150989 | 100.000 | 100.000  |

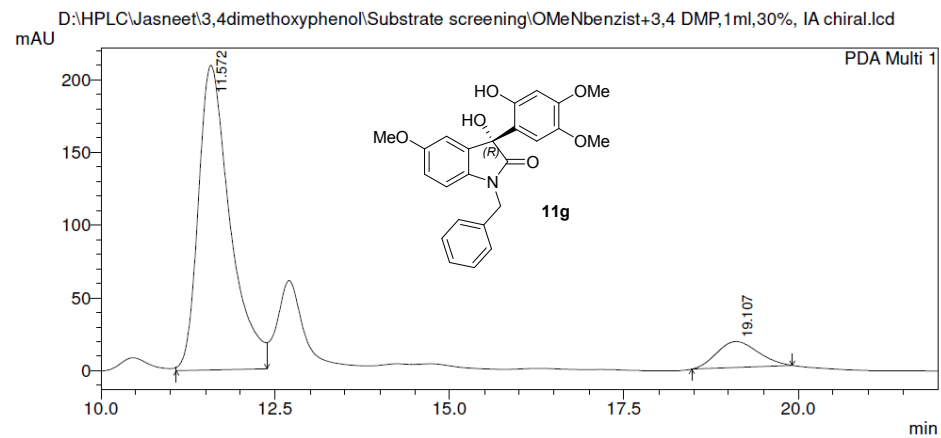

1 PDA Multi 1/209nm 4nm

PeakTable

| Peak# | Ret. Time | Area    | Height | Area %  | Height % |
|-------|-----------|---------|--------|---------|----------|
| 1     | 11.572    | 6604725 | 209326 | 89.949  | 92.145   |
| 2     | 19.107    | 738006  | 17844  | 10.051  | 7.855    |
| Total |           | 7342731 | 227170 | 100.000 | 100.000  |

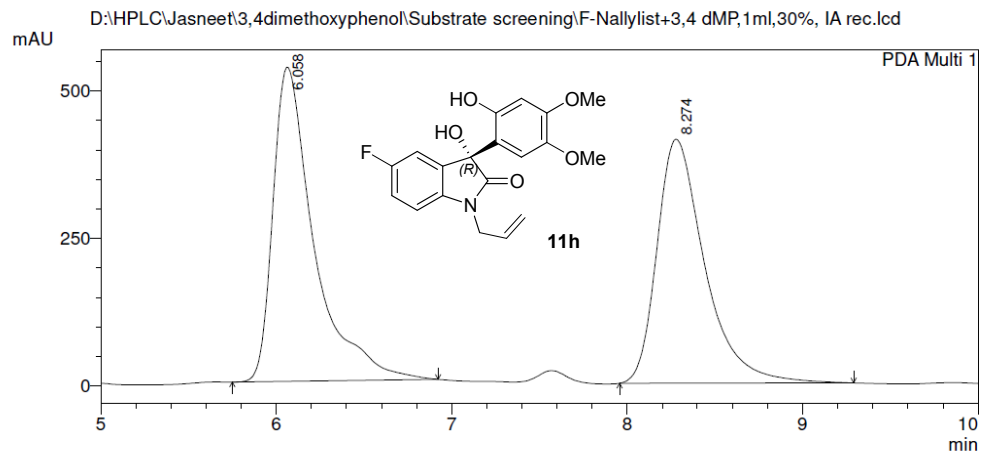

PeakTable

| Peak# | Ret. Time | Area     | Height | Area %  | Height % |
|-------|-----------|----------|--------|---------|----------|
| 1     | 6.058     | 8657208  | 531650 | 52.581  | 56.276   |
| 2     | 8.274     | 7807402  | 413068 | 47.419  | 43.724   |
| Total |           | 16464610 | 944718 | 100.000 | 100.000  |

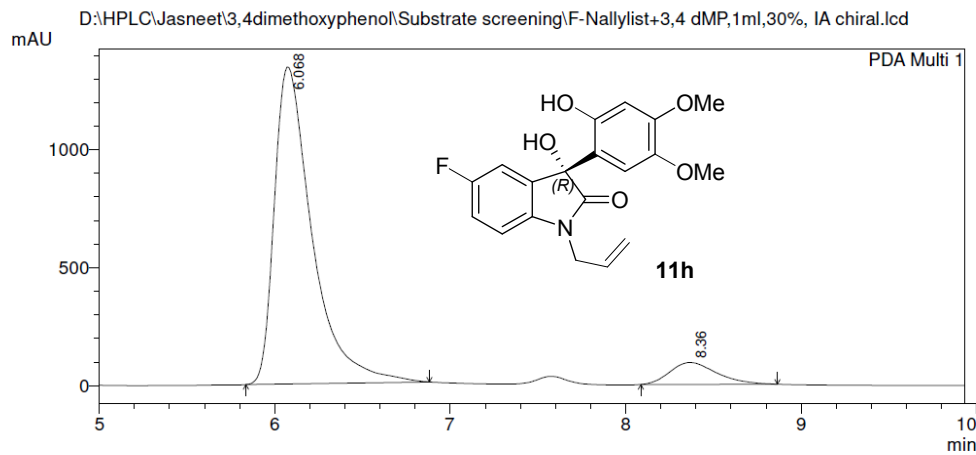

PeakTable

| Peak# | Ret. Time | Area     | Height  | Area %  | Height % |
|-------|-----------|----------|---------|---------|----------|
| 1     | 6.068     | 20086271 | 1342304 | 92.115  | 93.545   |
| 2     | 8.360     | 1719320  | 92620   | 7.885   | 6.455    |
| Total |           | 21805591 | 1434924 | 100.000 | 100.000  |

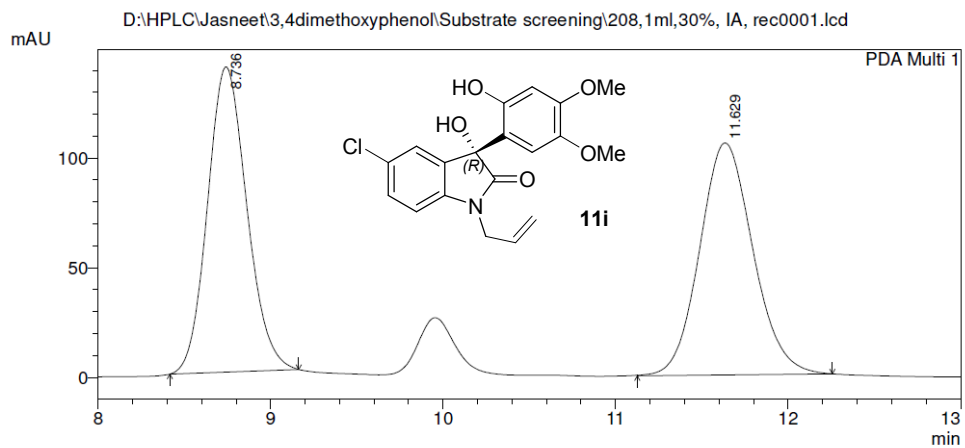

PeakTable

PDA Ch1 254nm 4nm

| Peak# | Ret. Time | Area    | Height | Area %  | Height % |
|-------|-----------|---------|--------|---------|----------|
| 1     | 8.736     | 2206091 | 139052 | 49.307  | 56.792   |
| 2     | 11.629    | 2268131 | 105793 | 50.693  | 43.208   |
| Total |           | 4474222 | 244845 | 100.000 | 100.000  |

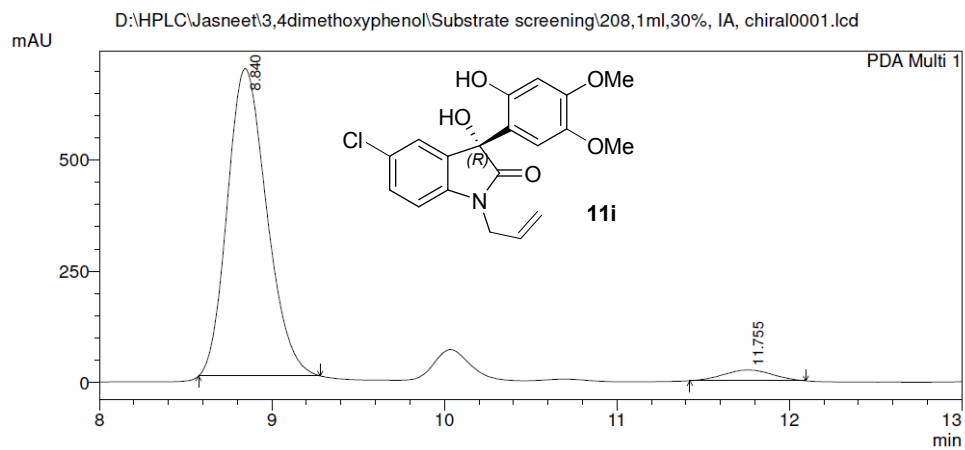

PeakTable

PDA Ch1 254nm 4nm

| Peak# | Ret. Time | Area     | Height | Area %  | Height % |
|-------|-----------|----------|--------|---------|----------|
| 1     | 8.840     | 10949651 | 690664 | 95.834  | 96.616   |
| 2     | 11.755    | 476038   | 24187  | 4.166   | 3.384    |
| Total |           | 11425688 | 714851 | 100.000 | 100.000  |

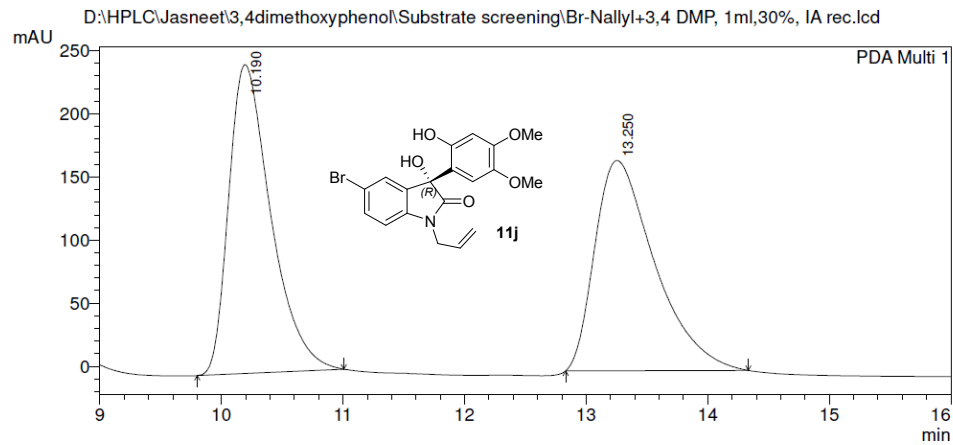

PeakTable

| PDA Ch1 254nm 4nm |           |          |        |         |          |
|-------------------|-----------|----------|--------|---------|----------|
| Peak#             | Ret. Time | Area     | Height | Area %  | Height % |
| 1                 | 10.190    | 5882704  | 244664 | 50.750  | 59.490   |
| 2                 | 13.250    | 5708895  | 166605 | 49.250  | 40.510   |
| Total             |           | 11591599 | 411269 | 100.000 | 100.000  |

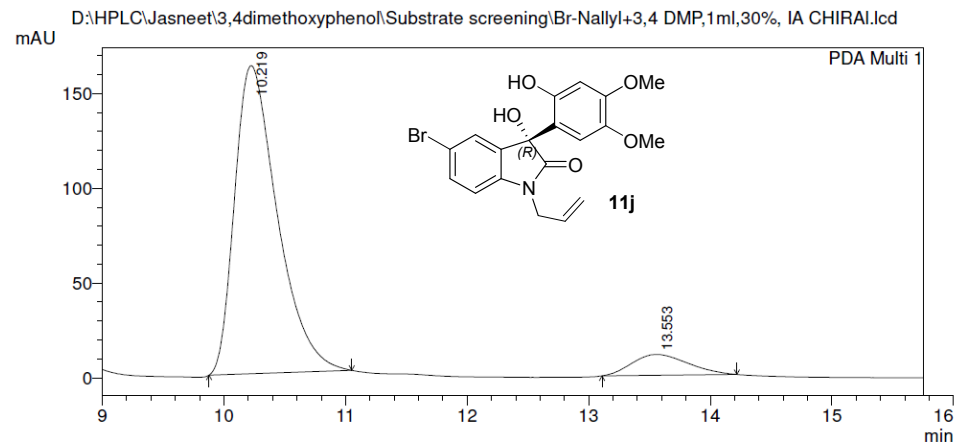

PeakTable

| PDA Ch1 254nm 4nm |           |         |        |         |          |
|-------------------|-----------|---------|--------|---------|----------|
| Peak#             | Ret. Time | Area    | Height | Area %  | Height % |
| 1                 | 10.219    | 3976877 | 162665 | 91.844  | 93.653   |
| 2                 | 13.553    | 353146  | 11025  | 8.156   | 6.347    |
| Total             |           | 4330022 | 173689 | 100.000 | 100.000  |

==== Shimadzu LCsolution Analysis Report ====

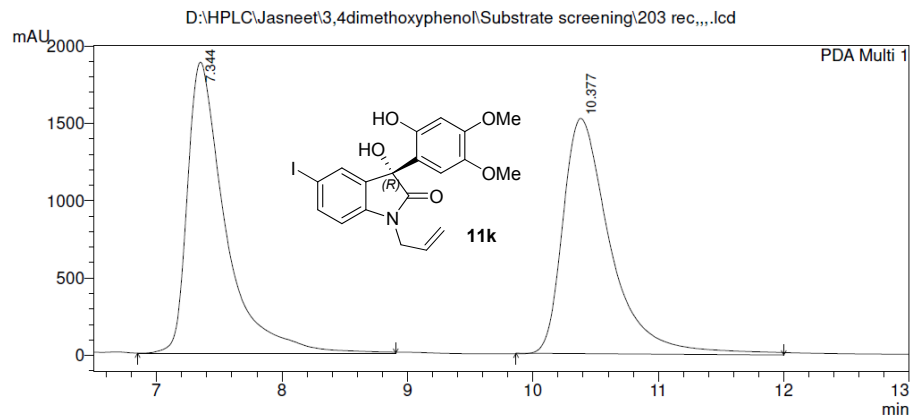

1 PDA Multi 1/209nm 4nm

PeakTable

PDA Ch1 209nm 4nm

| Peak# | Ret. Time | Area     | Height  | Area %  | Height % |
|-------|-----------|----------|---------|---------|----------|
| 1     | 7.344     | 39534485 | 1881713 | 49.663  | 55.327   |
| 2     | 10.377    | 40070939 | 1519338 | 50.337  | 44.673   |
| Total |           | 79605424 | 3401051 | 100.000 | 100.000  |

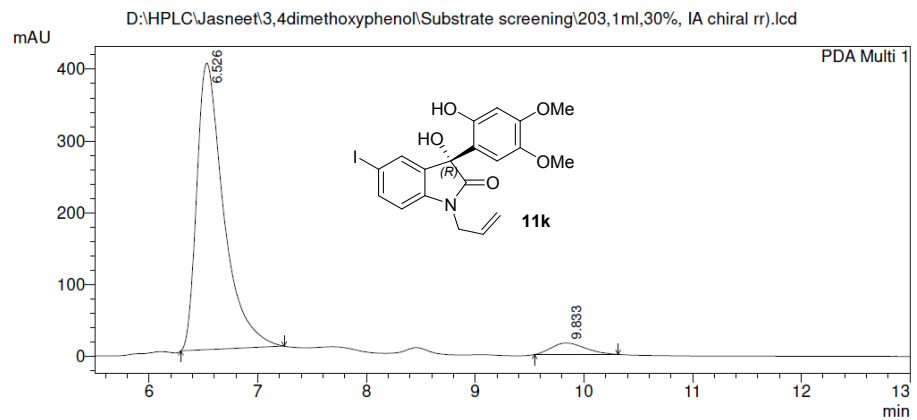

1 PDA Multi 1/254nm 4nm

PeakTable

PDA Ch1 254nm 4nm

| Peak# | Ret. Time | Area    | Height | Area %  | Height % |
|-------|-----------|---------|--------|---------|----------|
| 1     | 6.526     | 6858972 | 399435 | 95.203  | 96.163   |
| 2     | 9.833     | 345590  | 15938  | 4.797   | 3.837    |
| Total |           | 7204562 | 415373 | 100.000 | 100.000  |

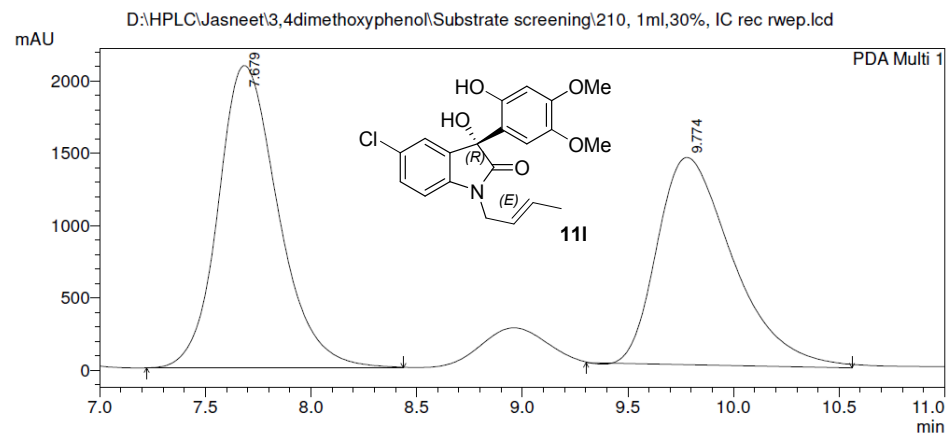

PeakTable

| Peak# | Ret. Time | Area     | Height  | Area %  | Height % |
|-------|-----------|----------|---------|---------|----------|
| 1     | 7.679     | 41414574 | 2088700 | 53.713  | 59.333   |
| 2     | 9.774     | 35688404 | 1431618 | 46.287  | 40.667   |
| Total |           | 77102978 | 3520318 | 100.000 | 100.000  |

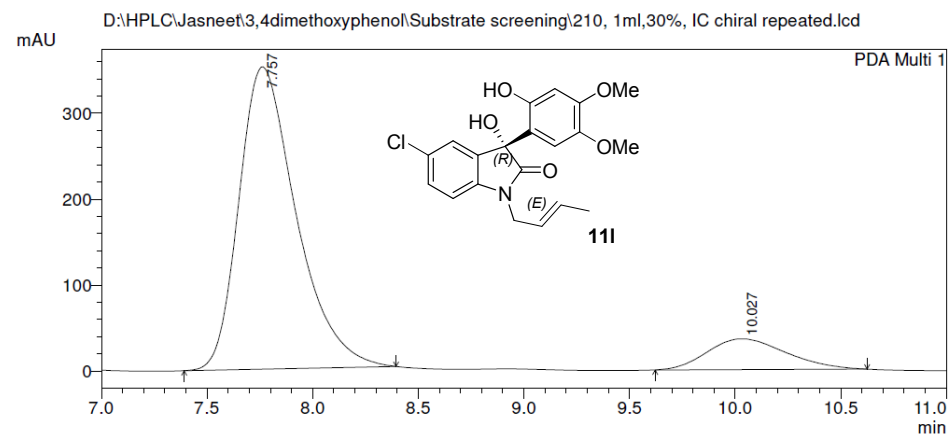

PeakTable

| Peak# | Ret. Time | Area    | Height | Area %  | Height % |
|-------|-----------|---------|--------|---------|----------|
| 1     | 7.757     | 6621480 | 351508 | 87.693  | 90.765   |
| 2     | 10.027    | 929303  | 35763  | 12.307  | 9.235    |
| Total |           | 7550783 | 387272 | 100.000 | 100.000  |

==== Shimadzu LCsolution Analysis Report ====

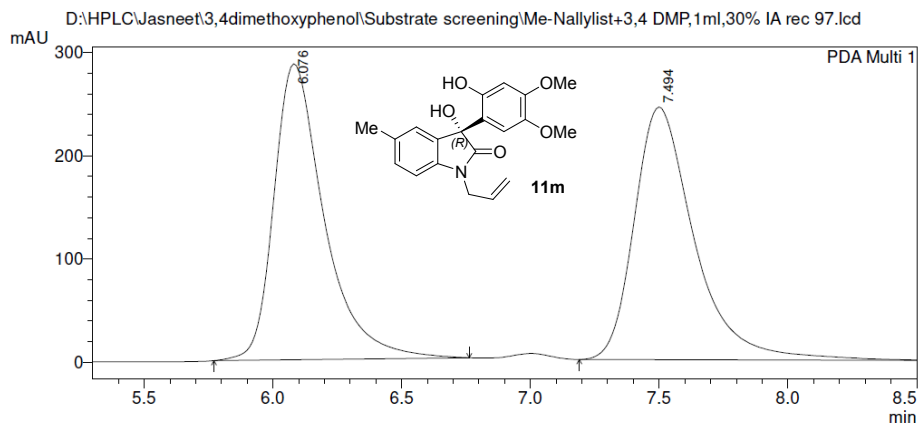

1 PDA Multi 1/254nm 4nm

PeakTable

PDA Ch1 254nm 4nm

| Peak# | Ret. Time | Area    | Height | Area %  | Height % |
|-------|-----------|---------|--------|---------|----------|
| 1     | 6.076     | 3901192 | 286881 | 49.522  | 53.950   |
| 2     | 7.494     | 3976580 | 244868 | 50.478  | 46.050   |
| Total |           | 7877772 | 531749 | 100.000 | 100.000  |

D:\HPLC\Jasneet\3,4dimethoxyphenol\Substrate screening\Me-Nallylist+3,4 DMP,1ml,30% IA chirak 98.lcd

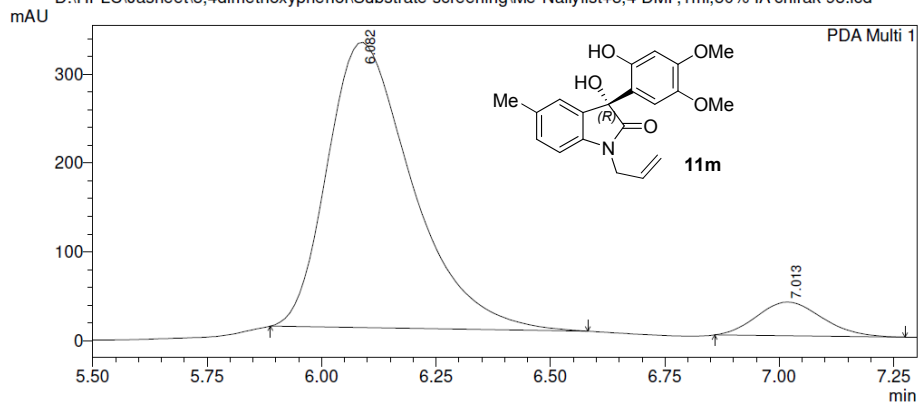

1 PDA Multi 1/254nm 4nm

PeakTable

PDA Ch1 254nm 4nm

| Peak# | Ret. Time | Area    | Height | Area %  | Height % |
|-------|-----------|---------|--------|---------|----------|
| 1     | 6.082     | 4142038 | 320925 | 91.677  | 89.396   |
| 2     | 7.013     | 376017  | 38068  | 8.323   | 10.604   |
| Total |           | 4518055 | 358994 | 100.000 | 100.000  |



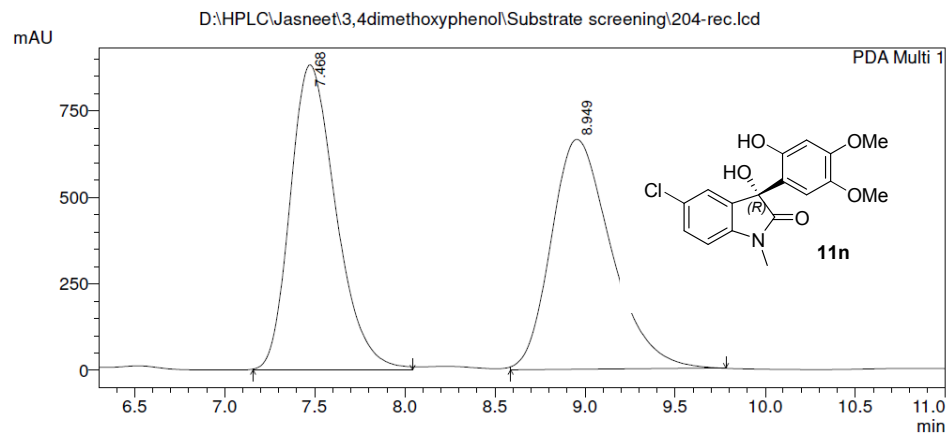

PeakTable

PDA Ch1 254nm 4nm

| Peak# | Ret. Time | Area     | Height  | Area %  | Height % |
|-------|-----------|----------|---------|---------|----------|
| 1     | 7.468     | 15559147 | 881164  | 50.158  | 57.004   |
| 2     | 8.949     | 15461263 | 664626  | 49.842  | 42.996   |
| Total |           | 31020410 | 1545790 | 100.000 | 100.000  |

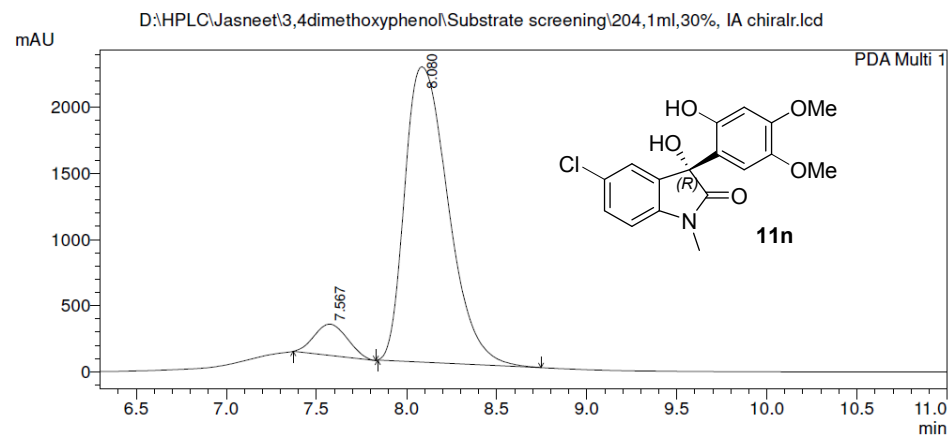

PeakTable

PDA Ch1 254nm 4nm

| Peak# | Ret. Time | Area     | Height  | Area %  | Height % |
|-------|-----------|----------|---------|---------|----------|
| 1     | 7.567     | 2998904  | 235534  | 7.396   | 9.537    |
| 2     | 8.080     | 37546402 | 2234119 | 92.604  | 90.463   |
| Total |           | 40545305 | 2469653 | 100.000 | 100.000  |

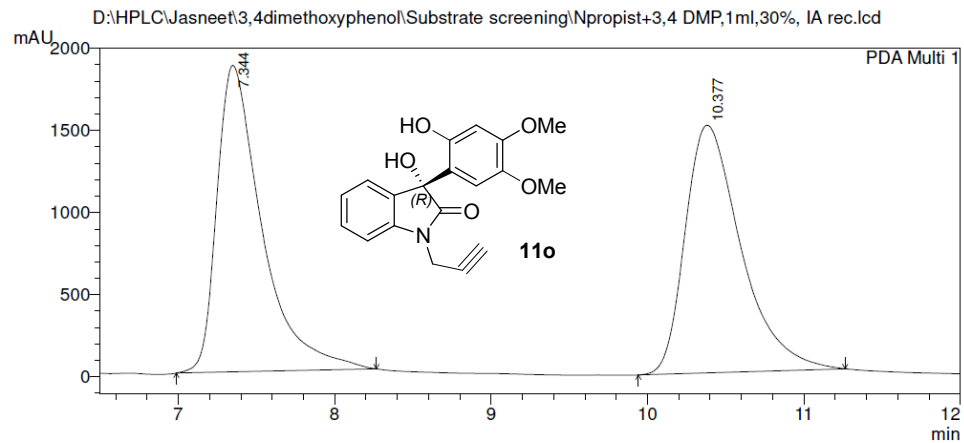

1 PDA Multi 1/209nm 4nm

PeakTable

PDA Ch1 209nm 4nm

| Peak# | Ret. Time | Area     | Height  | Area %  | Height % |
|-------|-----------|----------|---------|---------|----------|
| 1     | 7.344     | 37329065 | 1866231 | 49.907  | 55.319   |
| 2     | 10.377    | 37467925 | 1507347 | 50.093  | 44.681   |
| Total |           | 74796990 | 3373579 | 100.000 | 100.000  |

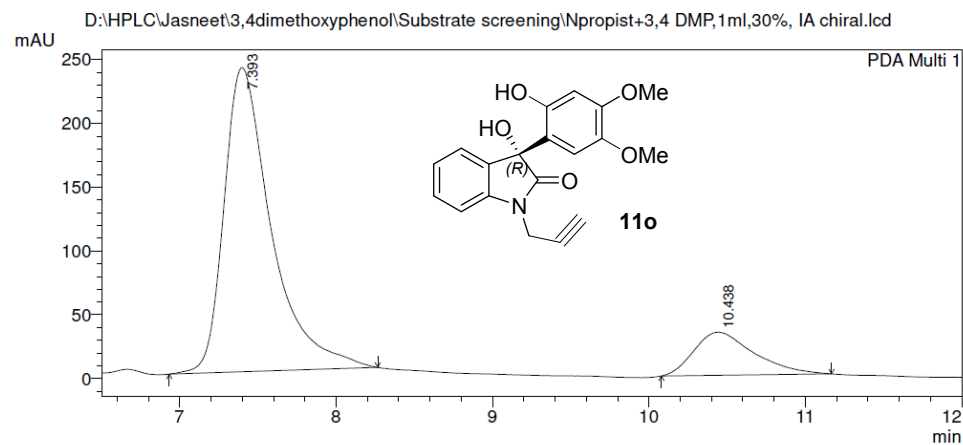

1 PDA Multi 1/209nm 4nm

PeakTable

PDA Ch1 209nm 4nm

| Peak# | Ret. Time | Area    | Height | Area %  | Height % |
|-------|-----------|---------|--------|---------|----------|
| 1     | 7.393     | 5013143 | 238422 | 84.770  | 87.588   |
| 2     | 10.438    | 900667  | 33786  | 15.230  | 12.412   |
| Total |           | 5913810 | 272208 | 100.000 | 100.000  |

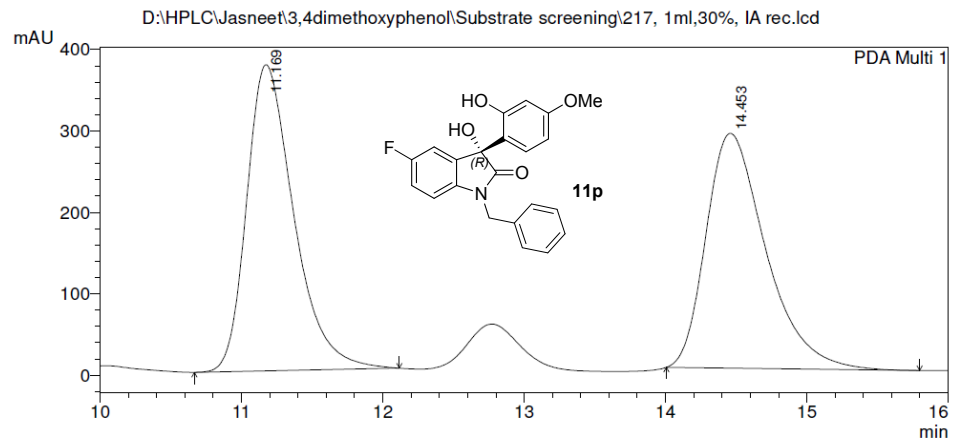

PeakTable

PDA Ch1 254nm 4nm

| Peak# | Ret. Time | Area     | Height | Area %  | Height % |
|-------|-----------|----------|--------|---------|----------|
| 1     | 11.169    | 8719758  | 376111 | 50.689  | 56.590   |
| 2     | 14.453    | 8482799  | 288517 | 49.311  | 43.410   |
| Total |           | 17202557 | 664628 | 100.000 | 100.000  |

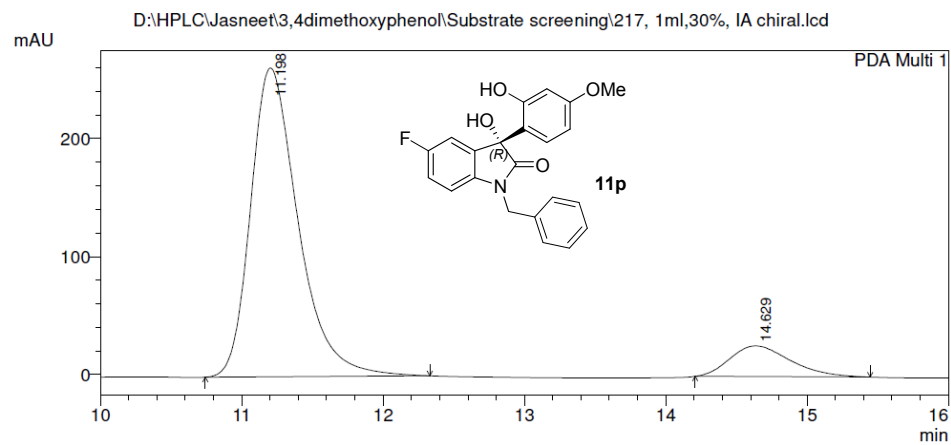

PeakTable

PDA Ch1 254nm 4nm

| Peak# | Ret. Time | Area    | Height | Area %  | Height % |
|-------|-----------|---------|--------|---------|----------|
| 1     | 11.198    | 6118524 | 262034 | 88.744  | 90.964   |
| 2     | 14.629    | 776080  | 26030  | 11.256  | 9.036    |
| Total |           | 6894605 | 288065 | 100.000 | 100.000  |

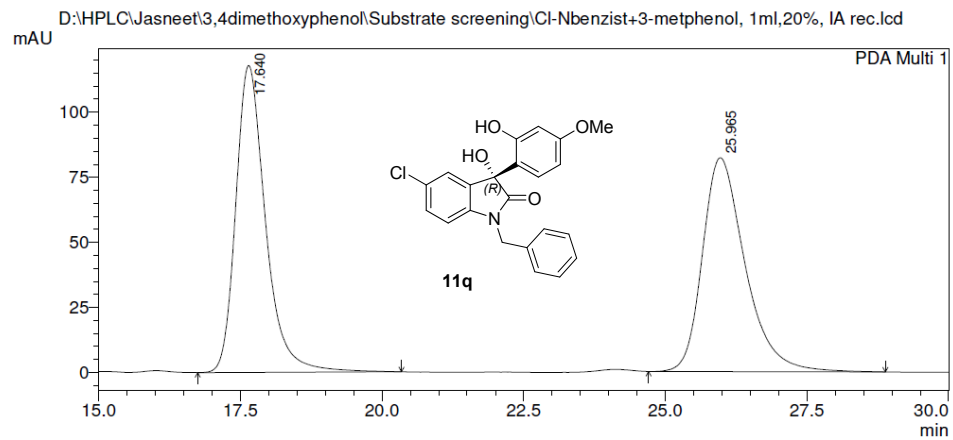

1 PDA Multi 1/254nm 4nm

PeakTable

PDA Ch1 254nm 4nm

| Peak# | Ret. Time | Area    | Height | Area %  | Height % |
|-------|-----------|---------|--------|---------|----------|
| 1     | 17.640    | 4315332 | 117835 | 50.058  | 58.923   |
| 2     | 25.965    | 4305328 | 82145  | 49.942  | 41.077   |
| Total |           | 8620660 | 199980 | 100.000 | 100.000  |

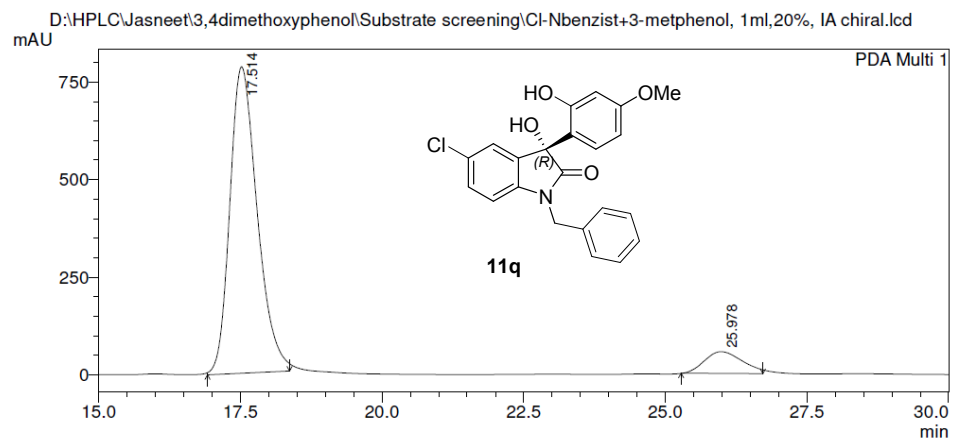

1 PDA Multi 1/254nm 4nm

PeakTable

PDA Ch1 254nm 4nm

| Peak# | Ret. Time | Area     | Height | Area %  | Height % |
|-------|-----------|----------|--------|---------|----------|
| 1     | 17.514    | 26384127 | 784666 | 91.071  | 93.372   |
| 2     | 25.978    | 2586898  | 55699  | 8.929   | 6.628    |
| Total |           | 28971025 | 840365 | 100.000 | 100.000  |

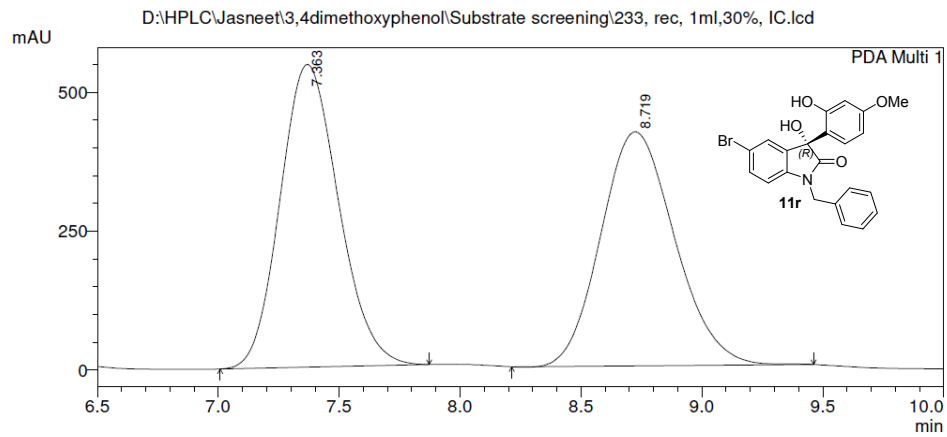

PeakTable

PDA Ch1 254nm 4nm

| Peak# | Ret. Time | Area     | Height | Area %  | Height % |
|-------|-----------|----------|--------|---------|----------|
| 1     | 7.363     | 9170894  | 545216 | 50.589  | 56.387   |
| 2     | 8.719     | 8957485  | 421696 | 49.411  | 43.613   |
| Total |           | 18128379 | 966912 | 100.000 | 100.000  |

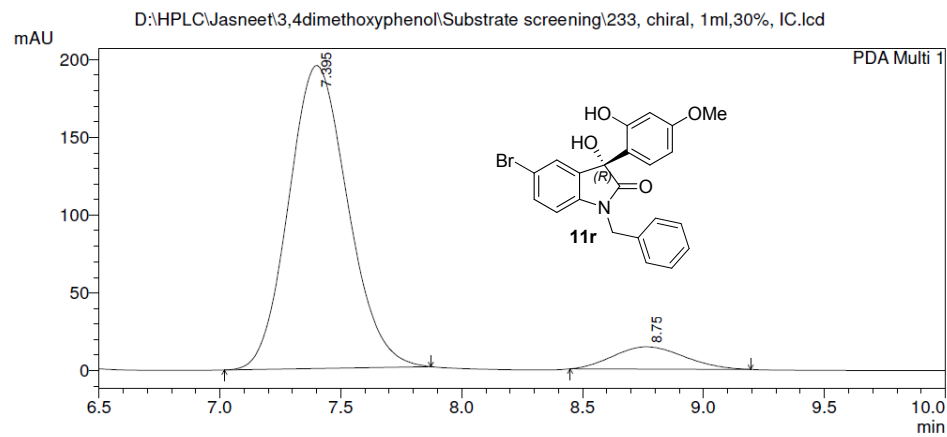

PeakTable

PDA Ch1 254nm 4nm

| Peak# | Ret. Time | Area    | Height | Area %  | Height % |
|-------|-----------|---------|--------|---------|----------|
| 1     | 7.395     | 3311031 | 194844 | 91.846  | 93.136   |
| 2     | 8.758     | 293933  | 14360  | 8.154   | 6.864    |
| Total |           | 3604964 | 209204 | 100.000 | 100.000  |

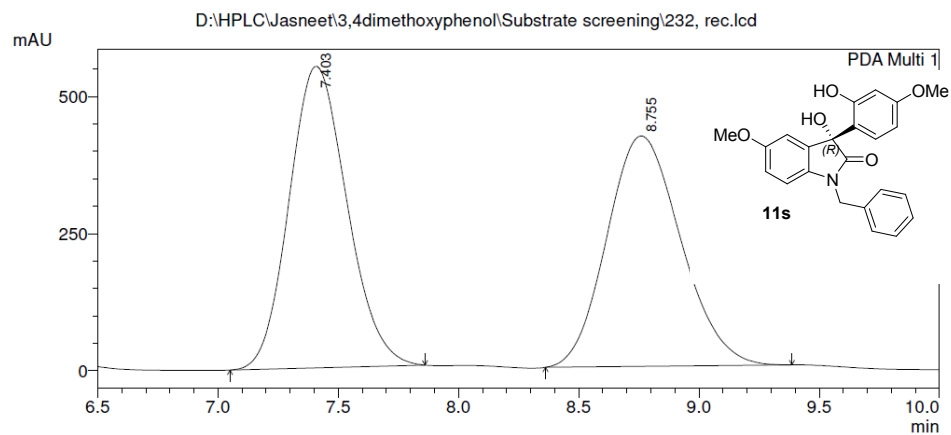

1 PDA Multi 1/254nm 4nm

PeakTable

PDA Ch1 254nm 4nm

| Peak# | Ret. Time | Area     | Height | Area %  | Height % |
|-------|-----------|----------|--------|---------|----------|
| 1     | 7.403     | 9201371  | 549656 | 50.591  | 56.682   |
| 2     | 8.755     | 8986491  | 420060 | 49.409  | 43.318   |
| Total |           | 18187863 | 969716 | 100.000 | 100.000  |

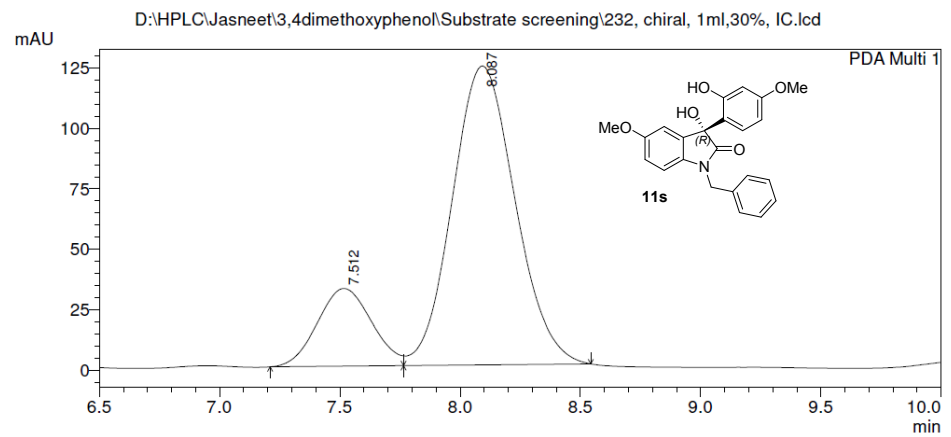

1 PDA Multi 1/254nm 4nm

PeakTable

PDA Ch1 254nm 4nm

| Peak# | Ret. Time | Area    | Height | Area %  | Height % |
|-------|-----------|---------|--------|---------|----------|
| 1     | 7.512     | 503909  | 32094  | 18.328  | 20.625   |
| 2     | 8.087     | 2245541 | 123513 | 81.672  | 79.375   |
| Total |           | 2749450 | 155608 | 100.000 | 100.000  |

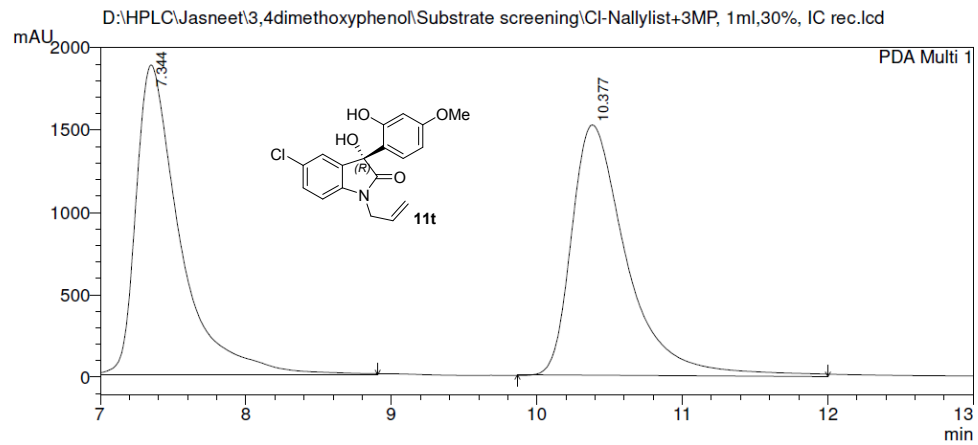

PeakTable

PDA Ch1 209nm 4nm

| Peak# | Ret. Time | Area     | Height  | Area %  | Height % |
|-------|-----------|----------|---------|---------|----------|
| 1     | 7.344     | 39534485 | 1881713 | 49.663  | 55.327   |
| 2     | 10.377    | 40070939 | 1519338 | 50.337  | 44.673   |
| Total |           | 79605424 | 3401051 | 100.000 | 100.000  |

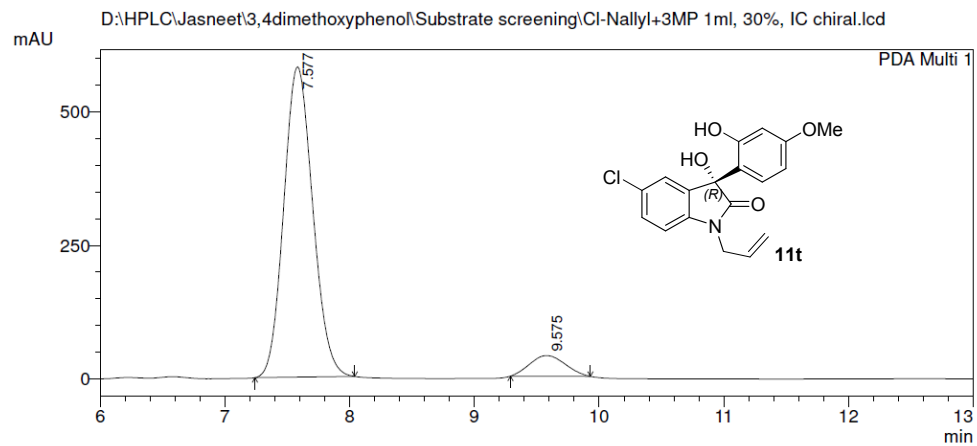

PeakTable

PDA Ch1 254nm 4nm

| Peak# | Ret. Time | Area     | Height | Area %  | Height % |
|-------|-----------|----------|--------|---------|----------|
| 1     | 7.577     | 9372977  | 580727 | 92.503  | 93.764   |
| 2     | 9.575     | 759685   | 38622  | 7.497   | 6.236    |
| Total |           | 10132662 | 619349 | 100.000 | 100.000  |

D:\HPLC\Jasneet\3,4dimethoxyphenol\Substrate screening\N-propt+,3-Metphenol,1ml,30%, IC rec.lcd

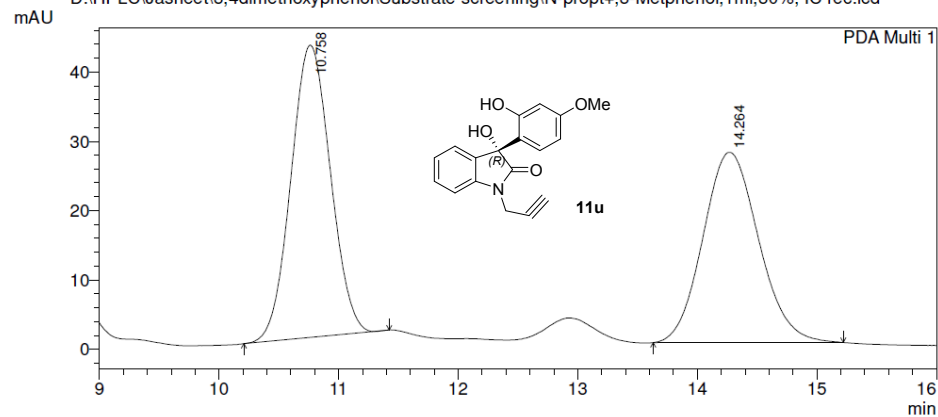

1 PDA Multi 1/254nm 4nm

PeakTable

PDA Ch1 254nm 4nm

| Peak# | Ret. Time | Area    | Height | Area %  | Height % |
|-------|-----------|---------|--------|---------|----------|
| 1     | 10.758    | 967728  | 42177  | 52.188  | 60.584   |
| 2     | 14.264    | 886567  | 27441  | 47.812  | 39.416   |
| Total |           | 1854295 | 69617  | 100.000 | 100.000  |

D:\HPLC\Jasneet\3,4dimethoxyphenol\Substrate screening\N-propt+,3-Metphenol,1ml,30%, IC chiral.lcd

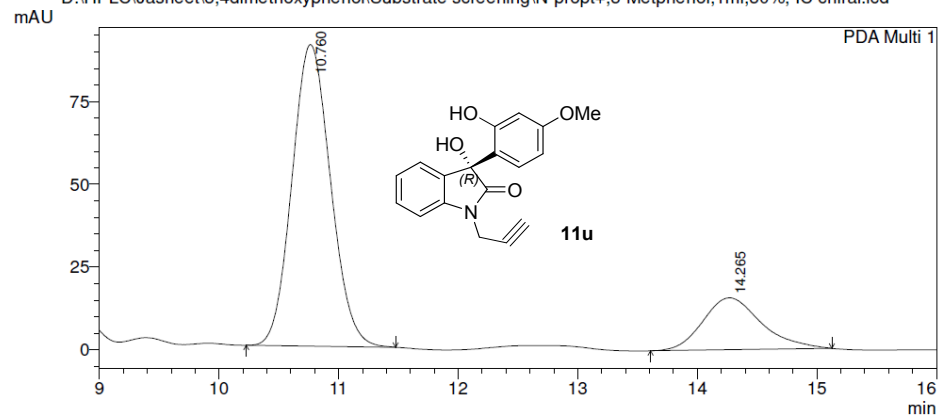

1 PDA Multi 1/254nm 4nm

PeakTable

PDA Ch1 254nm 4nm

| Peak# | Ret. Time | Area    | Height | Area %  | Height % |
|-------|-----------|---------|--------|---------|----------|
| 1     | 10.760    | 2047657 | 91204  | 79.340  | 85.320   |
| 2     | 14.265    | 533212  | 15693  | 20.660  | 14.680   |
| Total |           | 2580869 | 106896 | 100.000 | 100.000  |



D:\HPLC\Jasneet\3,4dimethoxyphenol\Substrate screening\N-ME+,3-Metphenol,1ml,30%, IC recrep.lcd

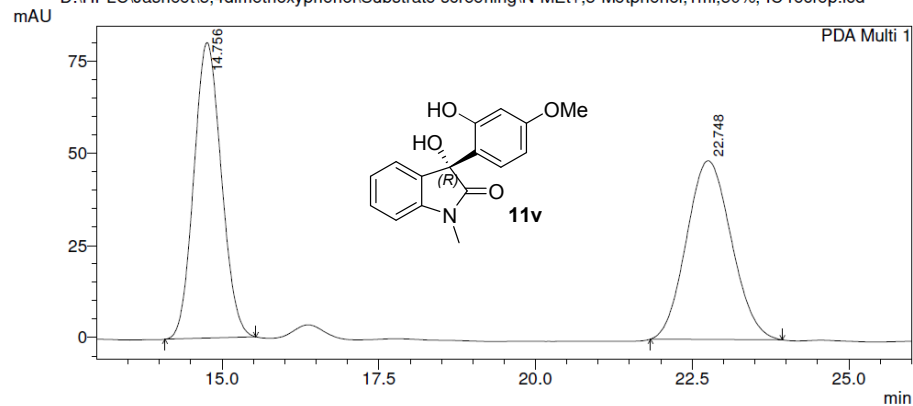

1 PDA Multi 1/254nm 4nm

PeakTable

PDA Ch1 254nm 4nm

| Peak# | Ret. Time | Area    | Height | Area %  | Height % |
|-------|-----------|---------|--------|---------|----------|
| 1     | 14.756    | 2451532 | 80244  | 50.384  | 62.322   |
| 2     | 22.748    | 2414133 | 48514  | 49.616  | 37.678   |
| Total |           | 4865665 | 128758 | 100.000 | 100.000  |

D:\HPLC\Jasneet\3,4dimethoxyphenol\Substrate screening\N-ME+,3-Metphenol,1ml,30%, IC chiral.lcd

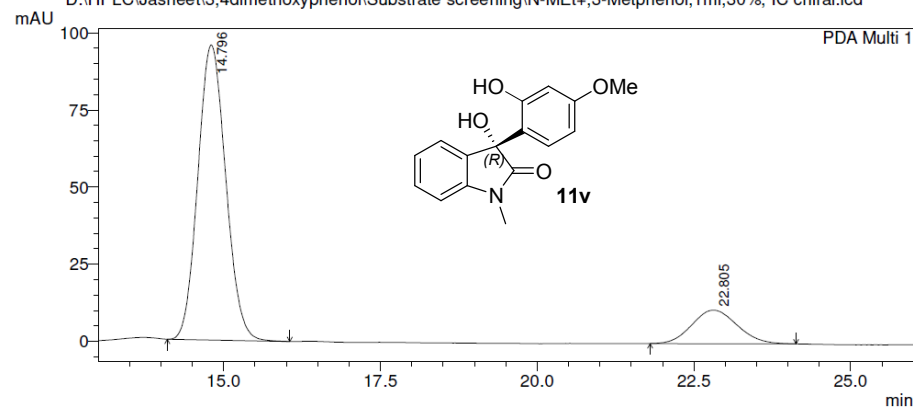

1 PDA Multi 1/254nm 4nm

PeakTable

PDA Ch1 254nm 4nm

| Peak# | Ret. Time | Area    | Height | Area %  | Height % |
|-------|-----------|---------|--------|---------|----------|
| 1     | 14.796    | 2959141 | 95618  | 84.339  | 89.766   |
| 2     | 22.805    | 549480  | 10901  | 15.661  | 10.234   |
| Total |           | 3508621 | 106519 | 100.000 | 100.000  |

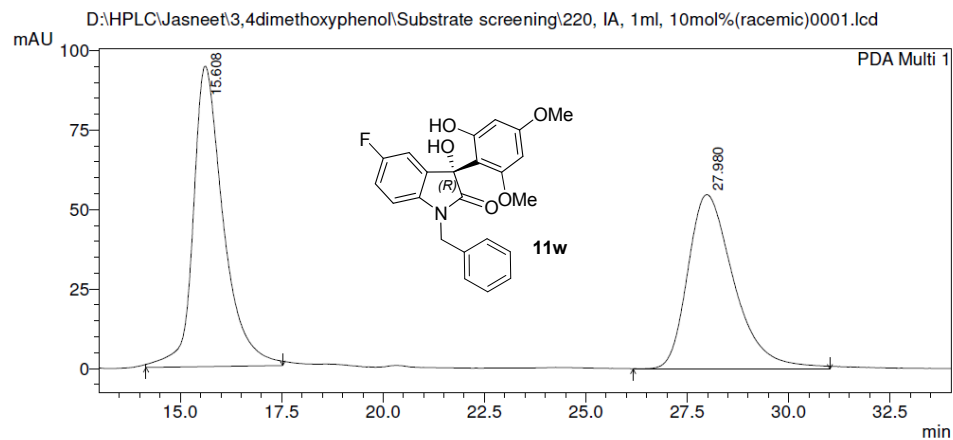

PeakTable

PDA Ch1 254nm 4nm

| Peak# | Ret. Time | Area    | Height | Area %  | Height % |
|-------|-----------|---------|--------|---------|----------|
| 1     | 15.608    | 4888271 | 94563  | 52.736  | 63.256   |
| 2     | 27.980    | 4381015 | 54929  | 47.264  | 36.744   |
| Total |           | 9269287 | 149492 | 100.000 | 100.000  |

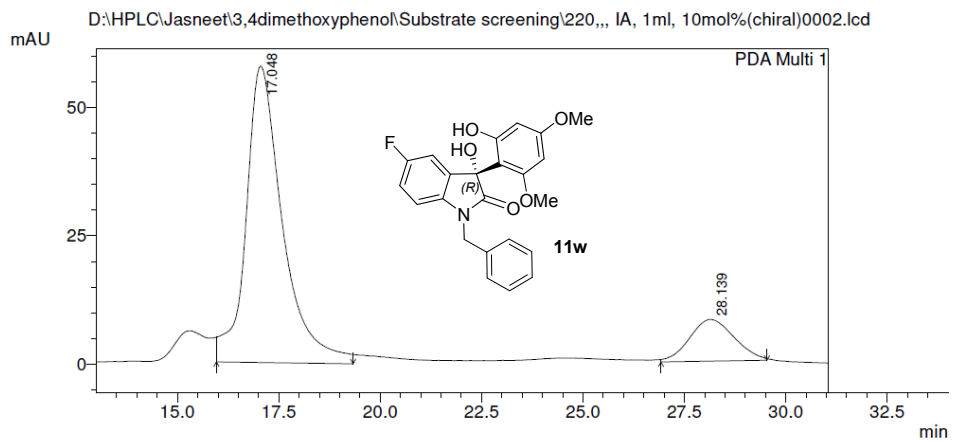

PeakTable

PDA Ch1 254nm 4nm

| Peak# | Ret. Time | Area    | Height | Area %  | Height % |
|-------|-----------|---------|--------|---------|----------|
| 1     | 17.048    | 3616132 | 57731  | 85.301  | 87.690   |
| 2     | 28.139    | 623152  | 8104   | 14.699  | 12.310   |
| Total |           | 4239283 | 65835  | 100.000 | 100.000  |

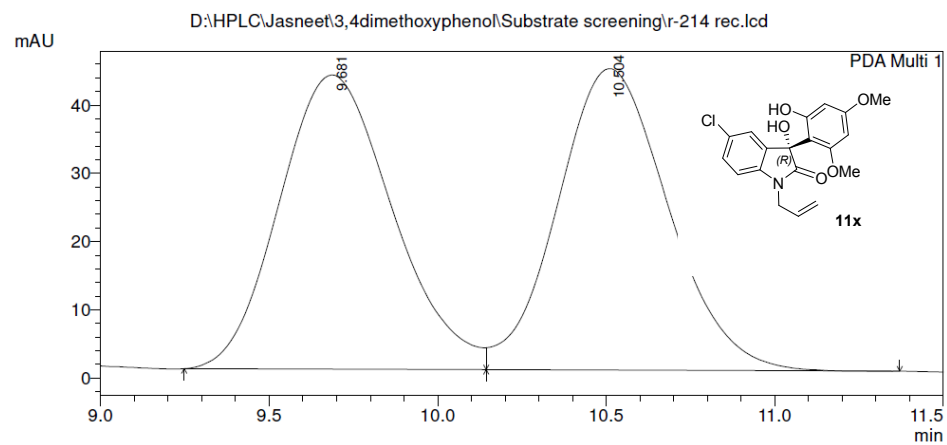

1 PDA Multi 1/254nm 4nm

PeakTable

PDA Ch1 254nm 4nm

| Peak# | Ret. Time | Area    | Height | Area %  | Height % |
|-------|-----------|---------|--------|---------|----------|
| 1     | 9.681     | 1007418 | 43122  | 50.012  | 49.398   |
| 2     | 10.504    | 1006944 | 44173  | 49.988  | 50.602   |
| Total |           | 2014361 | 87295  | 100.000 | 100.000  |

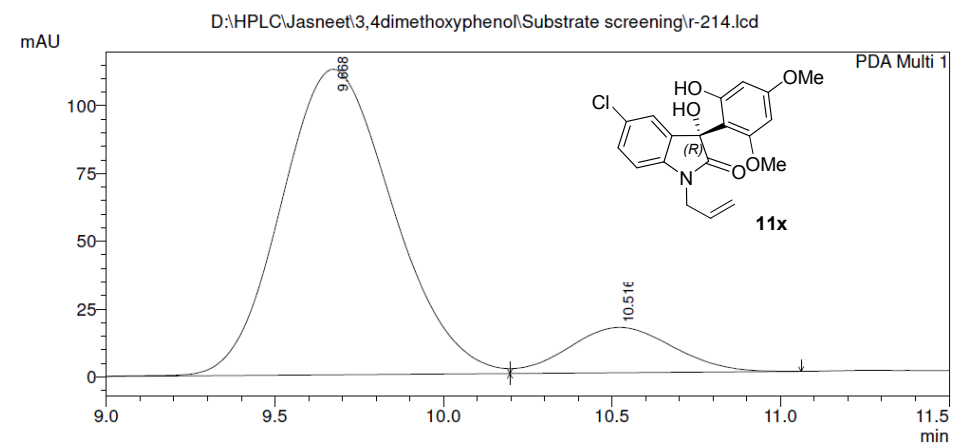

1 PDA Multi 1/254nm 4nm

PeakTable

PDA Ch1 254nm 4nm

| Peak# | Ret. Time | Area    | Height | Area %  | Height % |
|-------|-----------|---------|--------|---------|----------|
| 1     | 9.668     | 2588111 | 112605 | 87.746  | 87.070   |
| 2     | 10.516    | 361424  | 16721  | 12.254  | 12.930   |
| Total |           | 2949535 | 129327 | 100.000 | 100.000  |

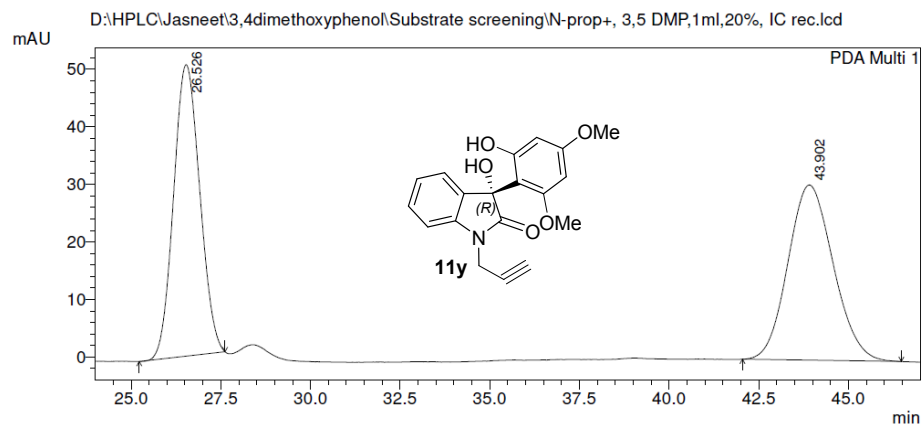

1 PDA Multi 1/254nm 4nm

PeakTable

PDA Ch1 254nm 4nm

| Peak# | Ret. Time | Area    | Height | Area %  | Height % |
|-------|-----------|---------|--------|---------|----------|
| 1     | 26.526    | 2572176 | 50679  | 49.017  | 62.473   |
| 2     | 43.902    | 2675352 | 30442  | 50.983  | 37.527   |
| Total |           | 5247528 | 81121  | 100.000 | 100.000  |

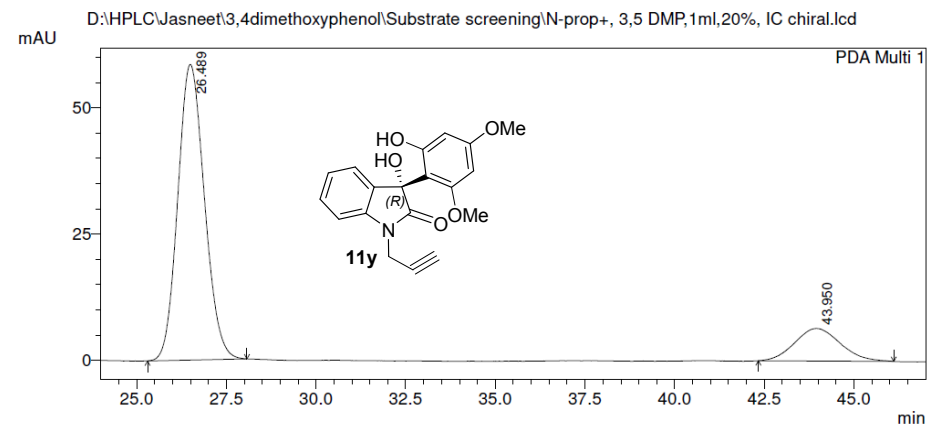

1 PDA Multi 1/254nm 4nm

PeakTable

PDA Ch1 254nm 4nm

| Peak# | Ret. Time | Area    | Height | Area %  | Height % |
|-------|-----------|---------|--------|---------|----------|
| 1     | 26.489    | 3024689 | 58522  | 84.063  | 90.049   |
| 2     | 43.950    | 573429  | 6467   | 15.937  | 9.951    |
| Total |           | 3598118 | 64989  | 100.000 | 100.000  |

### ==== Shimadzu LCsolution Analysis Report ====

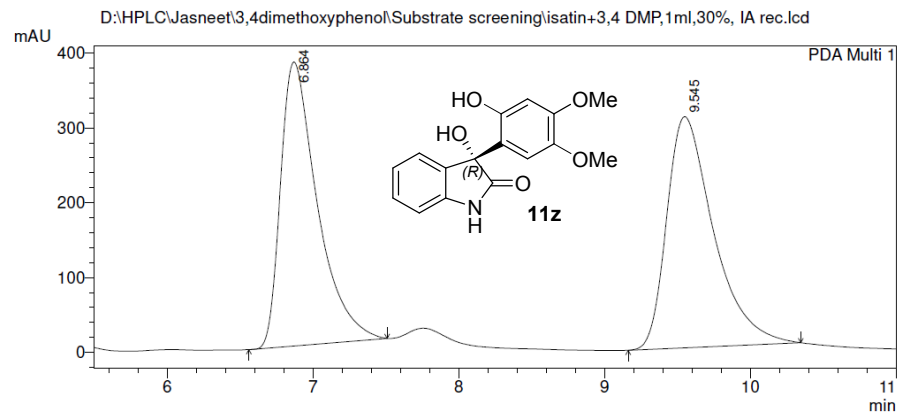

1 PDA Multi 1/254nm 4nm

PeakTable

| Peak# | Ret. Time | Area     | Height | Area %  | Height % |
|-------|-----------|----------|--------|---------|----------|
| 1     | 6.864     | 6659271  | 380054 | 49.059  | 55.138   |
| 2     | 9.545     | 6914647  | 309223 | 50.941  | 44.862   |
| Total |           | 13573918 | 689276 | 100.000 | 100.000  |

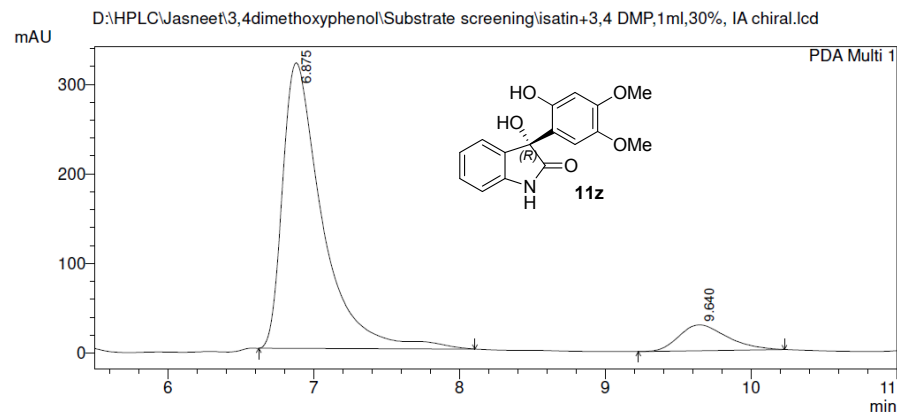

1 PDA Multi 1/254nm 4nm

PeakTable

| Peak# | Ret. Time | Area    | Height | Area %  | Height % |
|-------|-----------|---------|--------|---------|----------|
| 1     | 6.875     | 6048064 | 319080 | 90.089  | 91.692   |
| 2     | 9.640     | 665378  | 28912  | 9.911   | 8.308    |
| Total |           | 6713442 | 347992 | 100.000 | 100.000  |

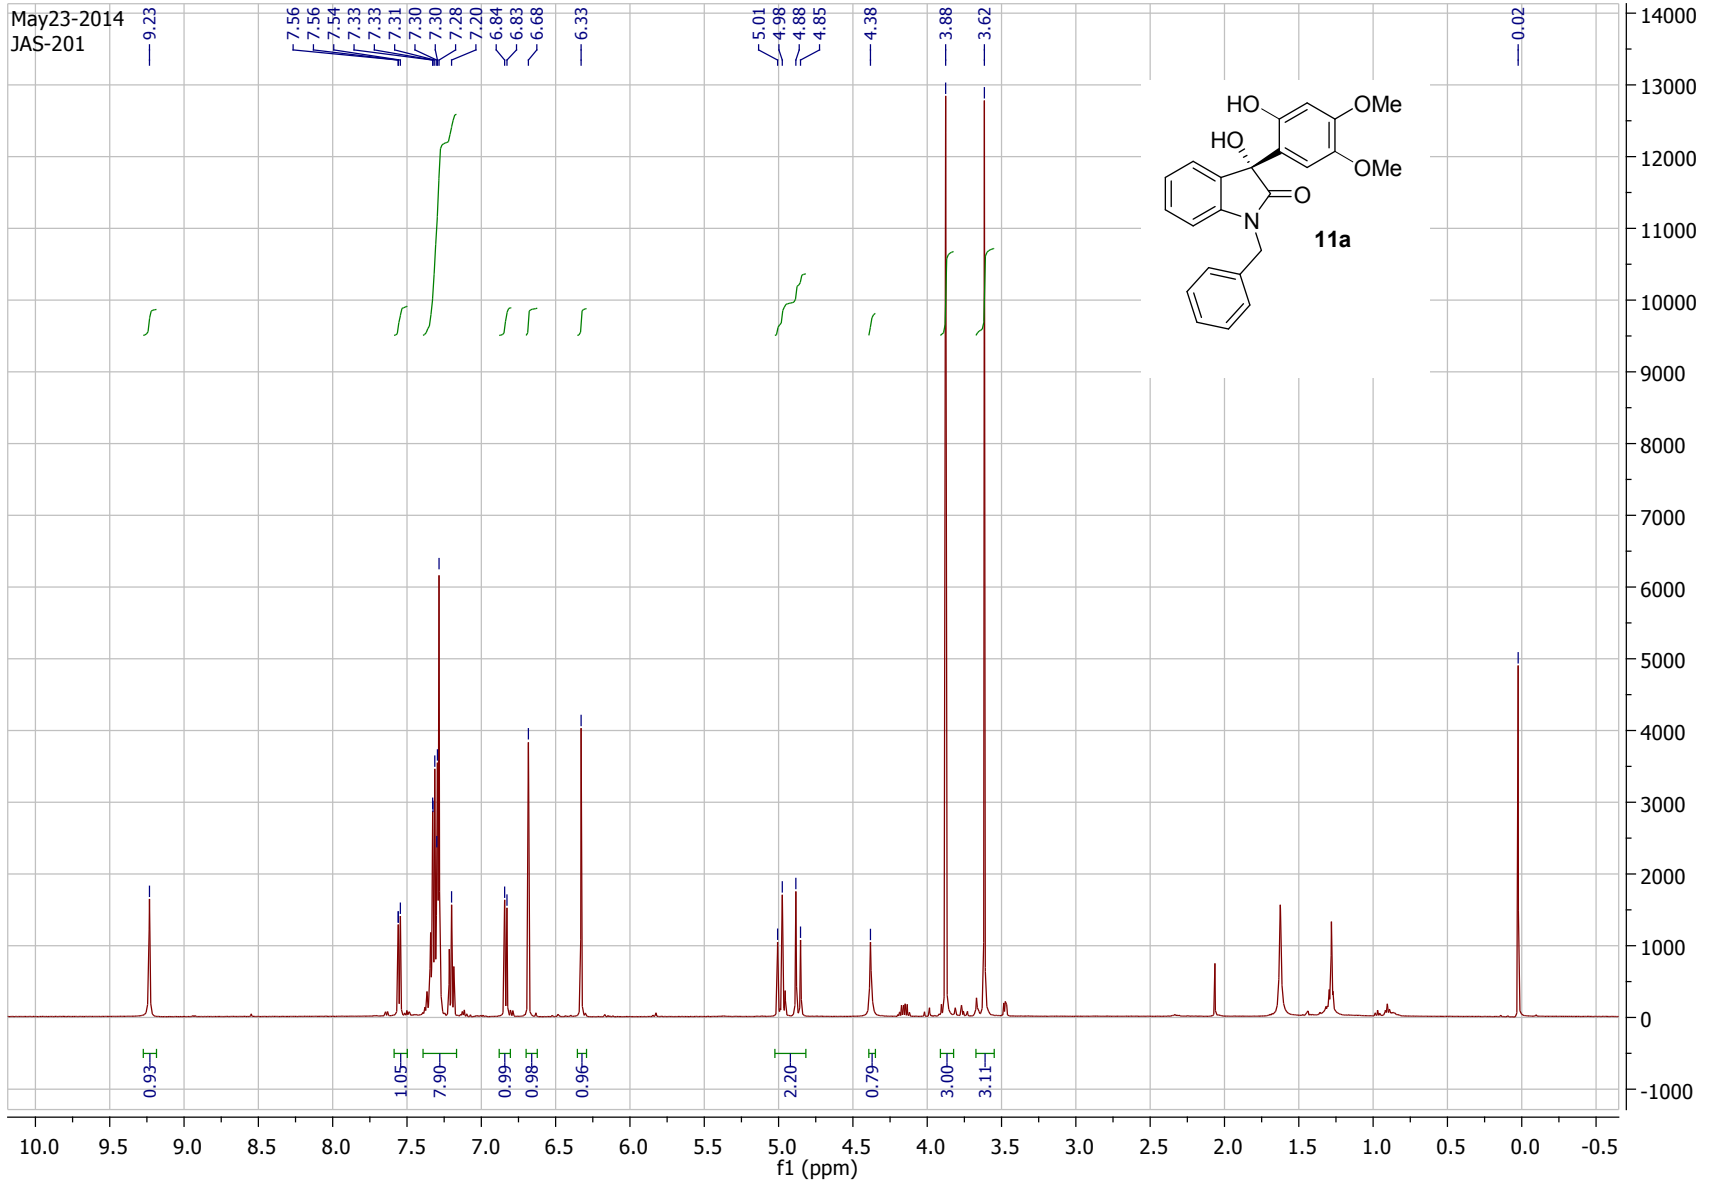

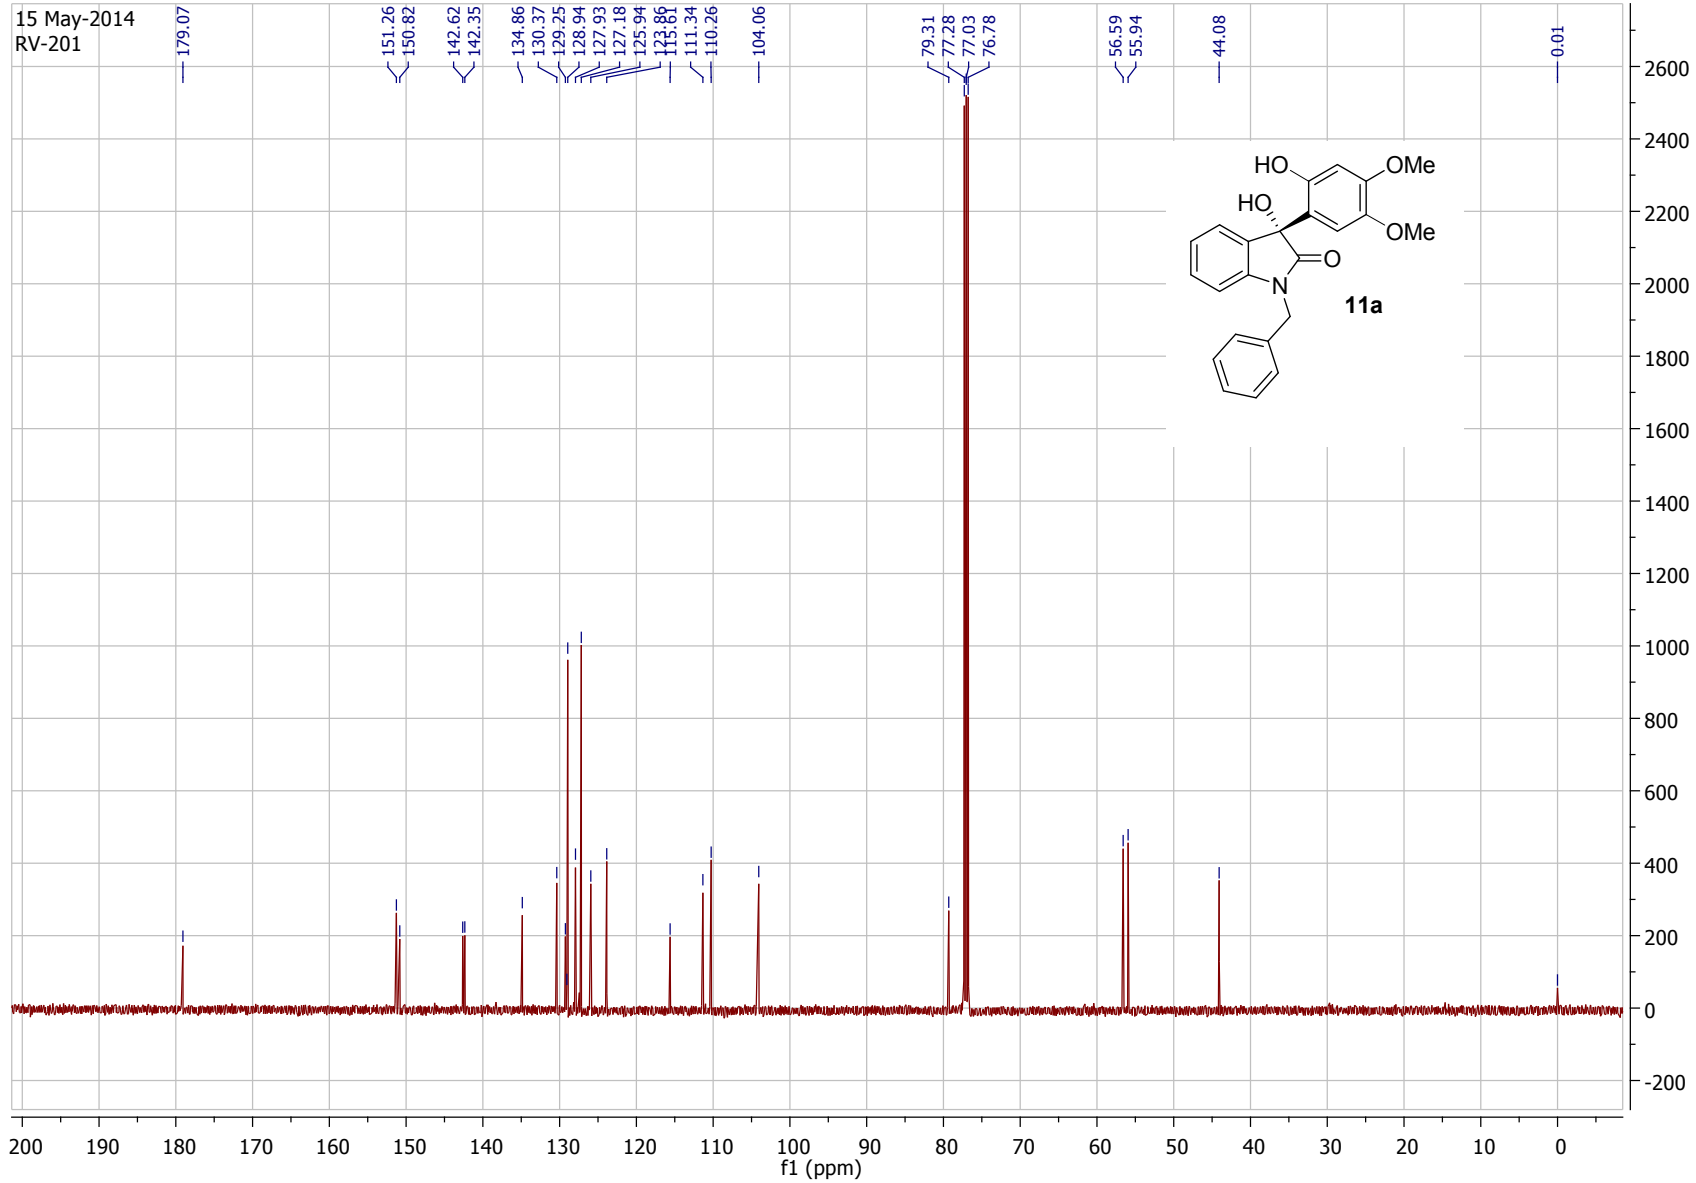

20 oct 2014  
JAS-N4

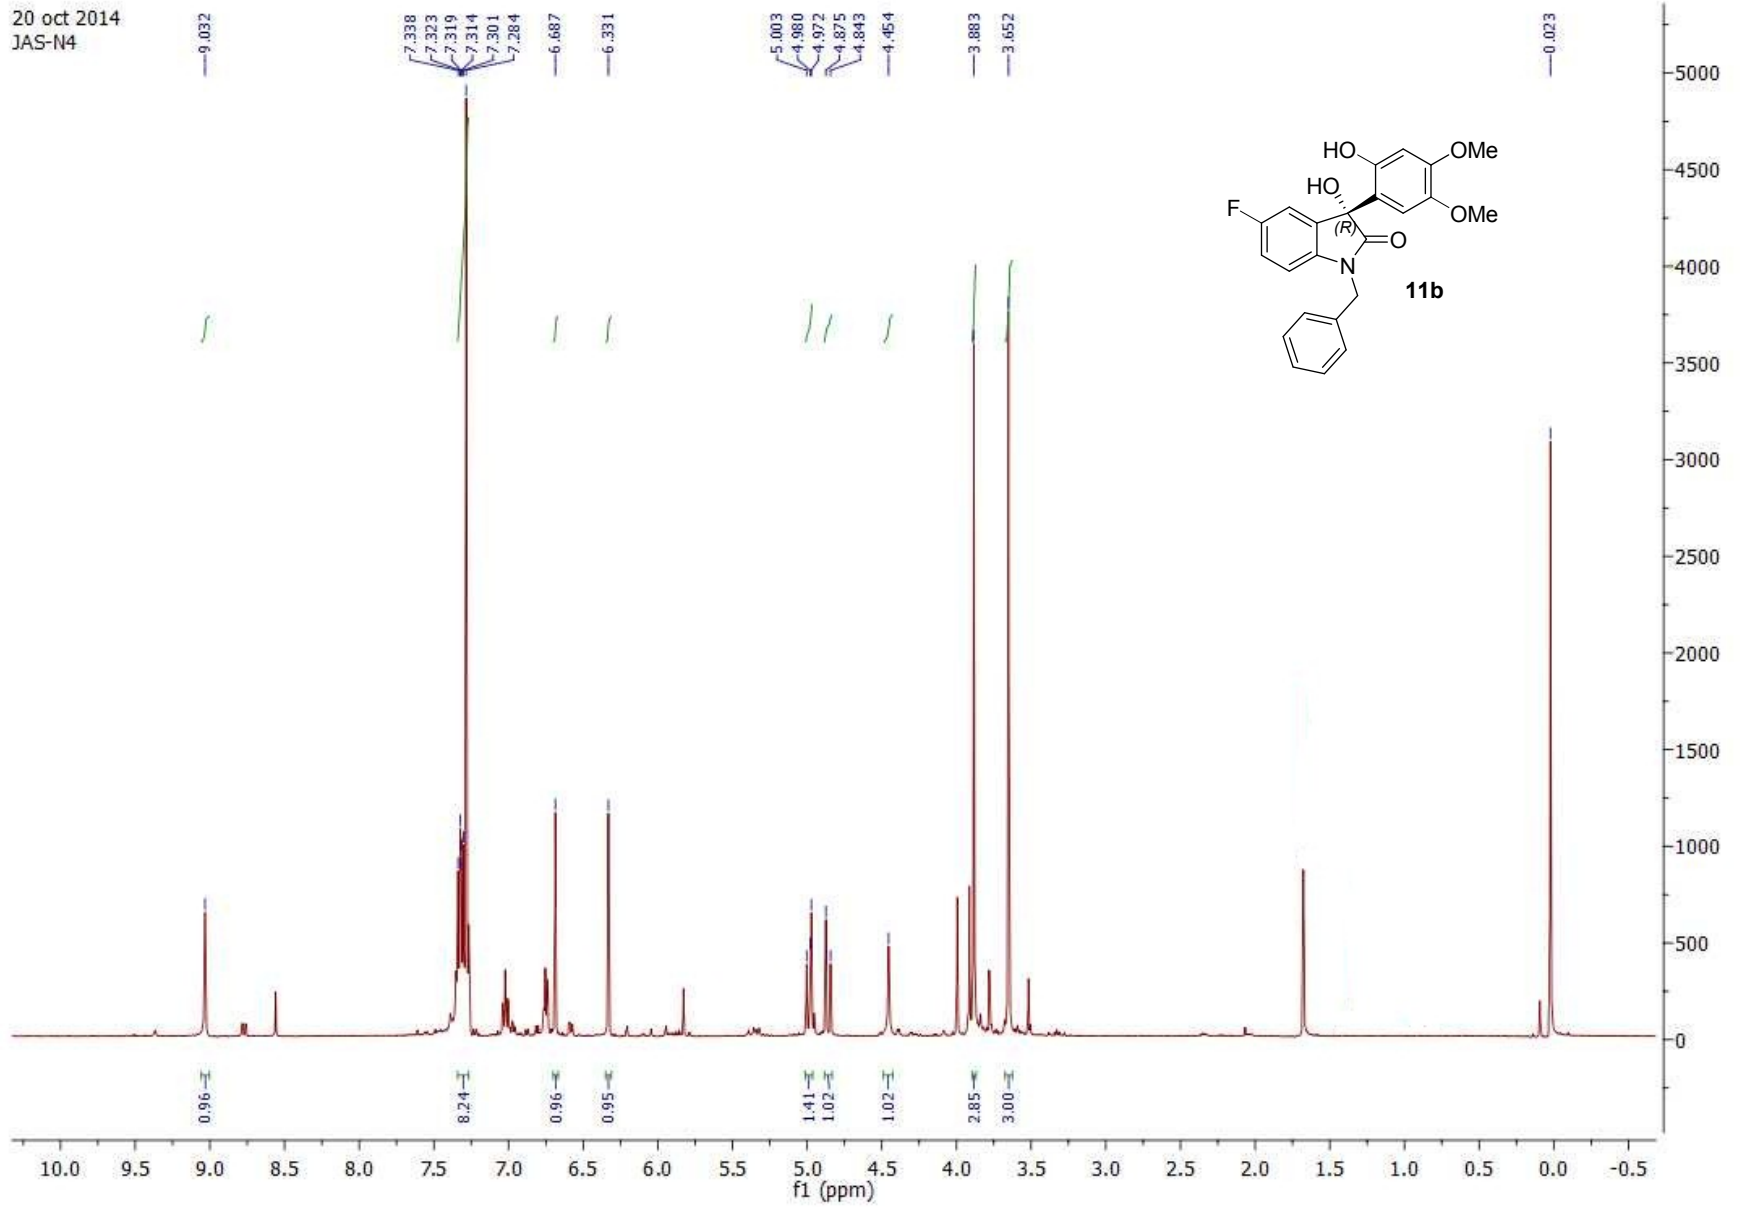



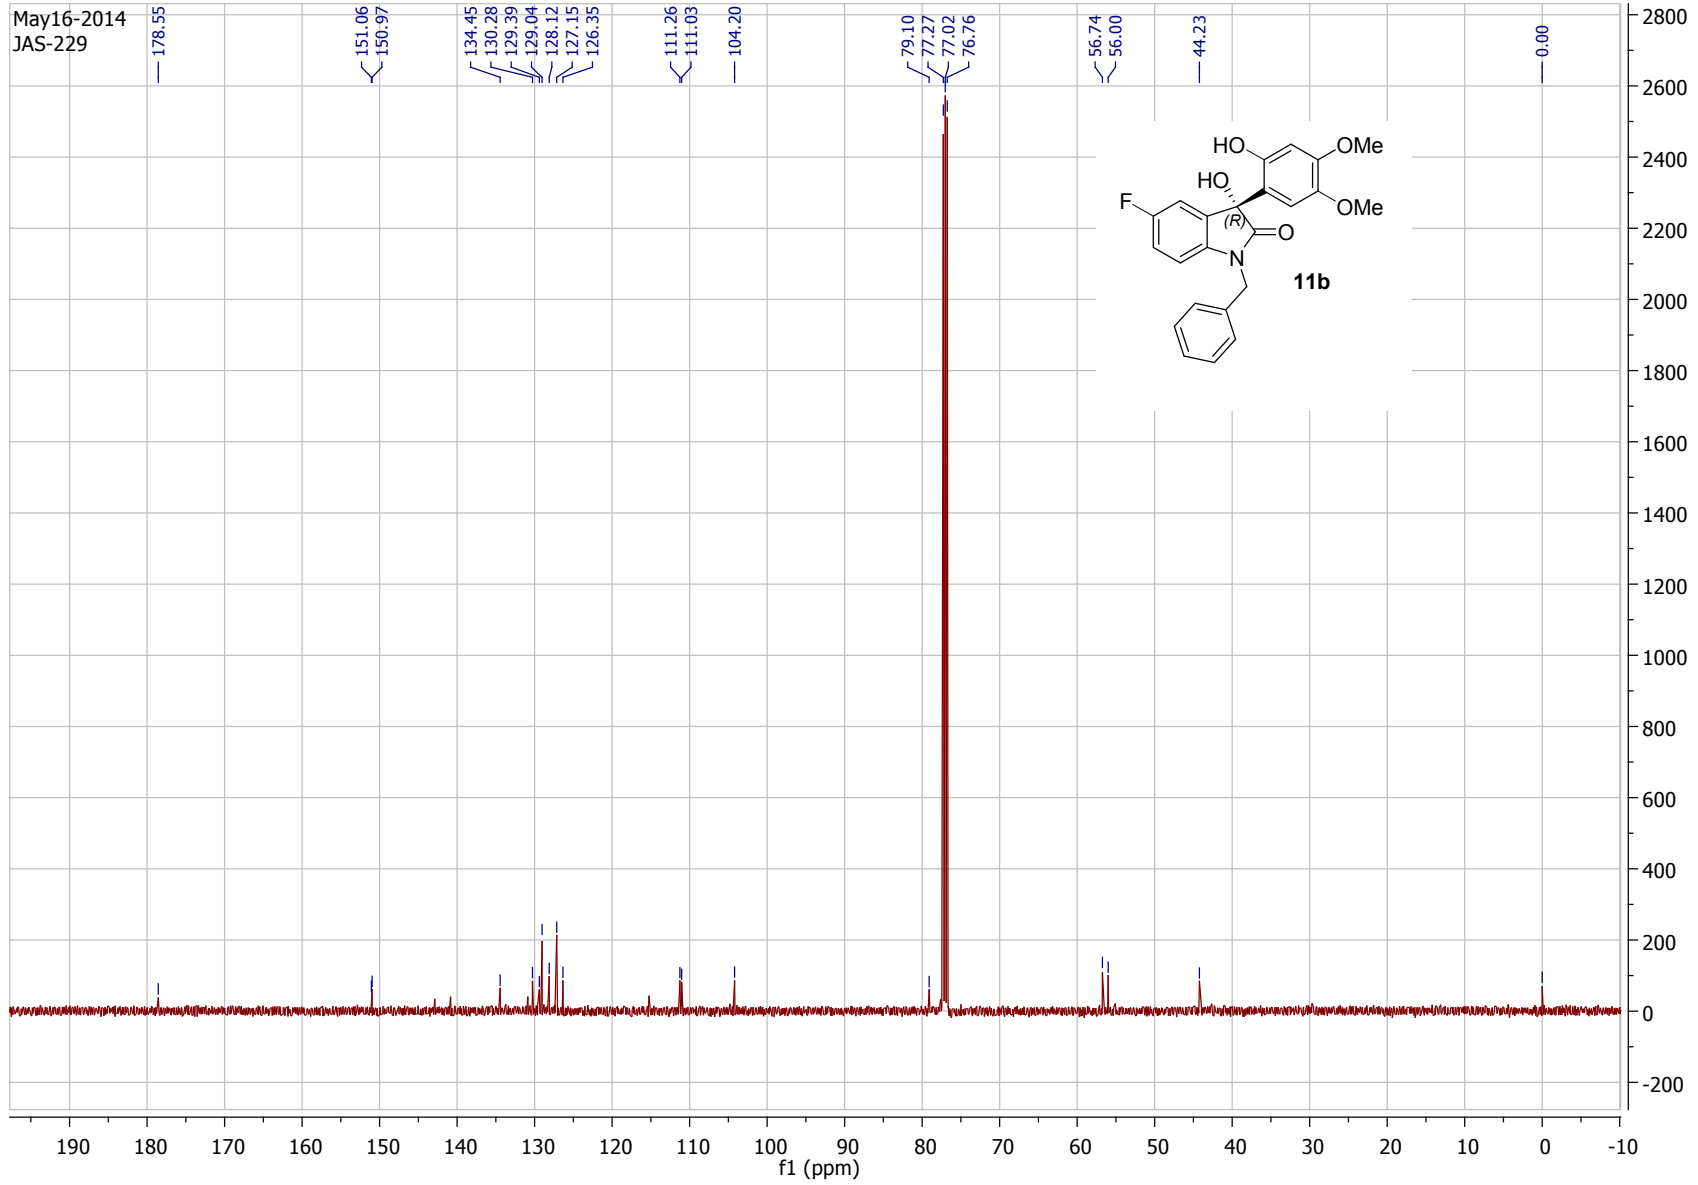

C:\Users\Ytechnologies\Desktop\Ynmrs\YDr\_Chimni\YC-SB2061NON\_E2\_FT.als

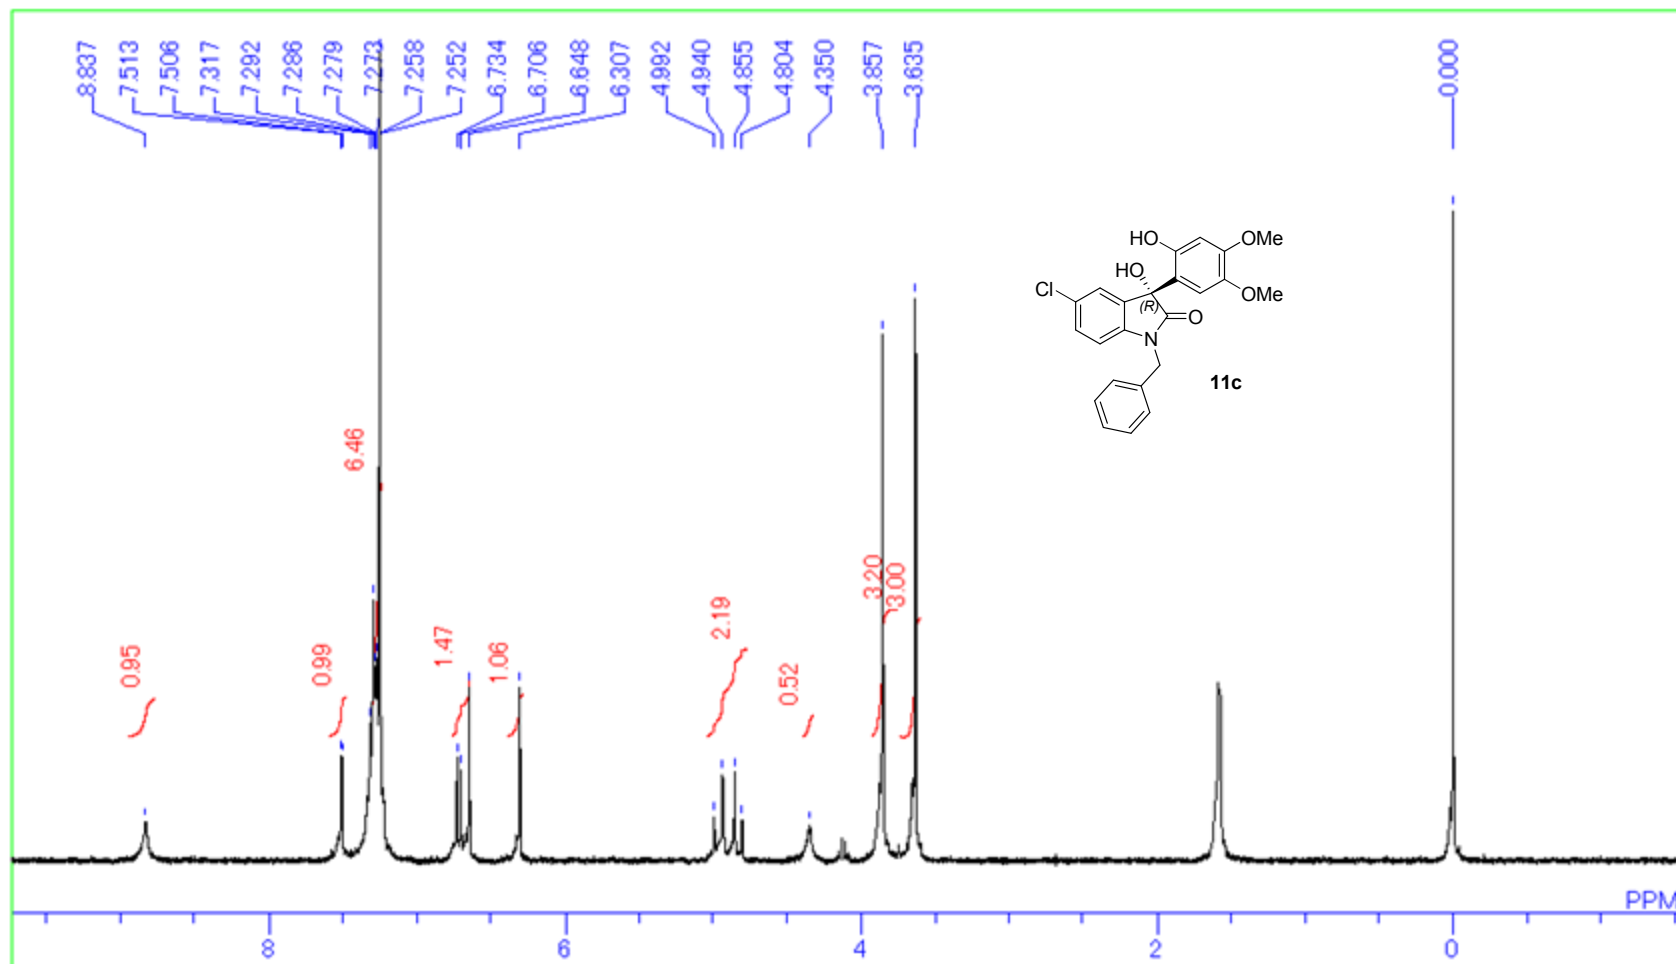

May 13-2014  
JAS-206

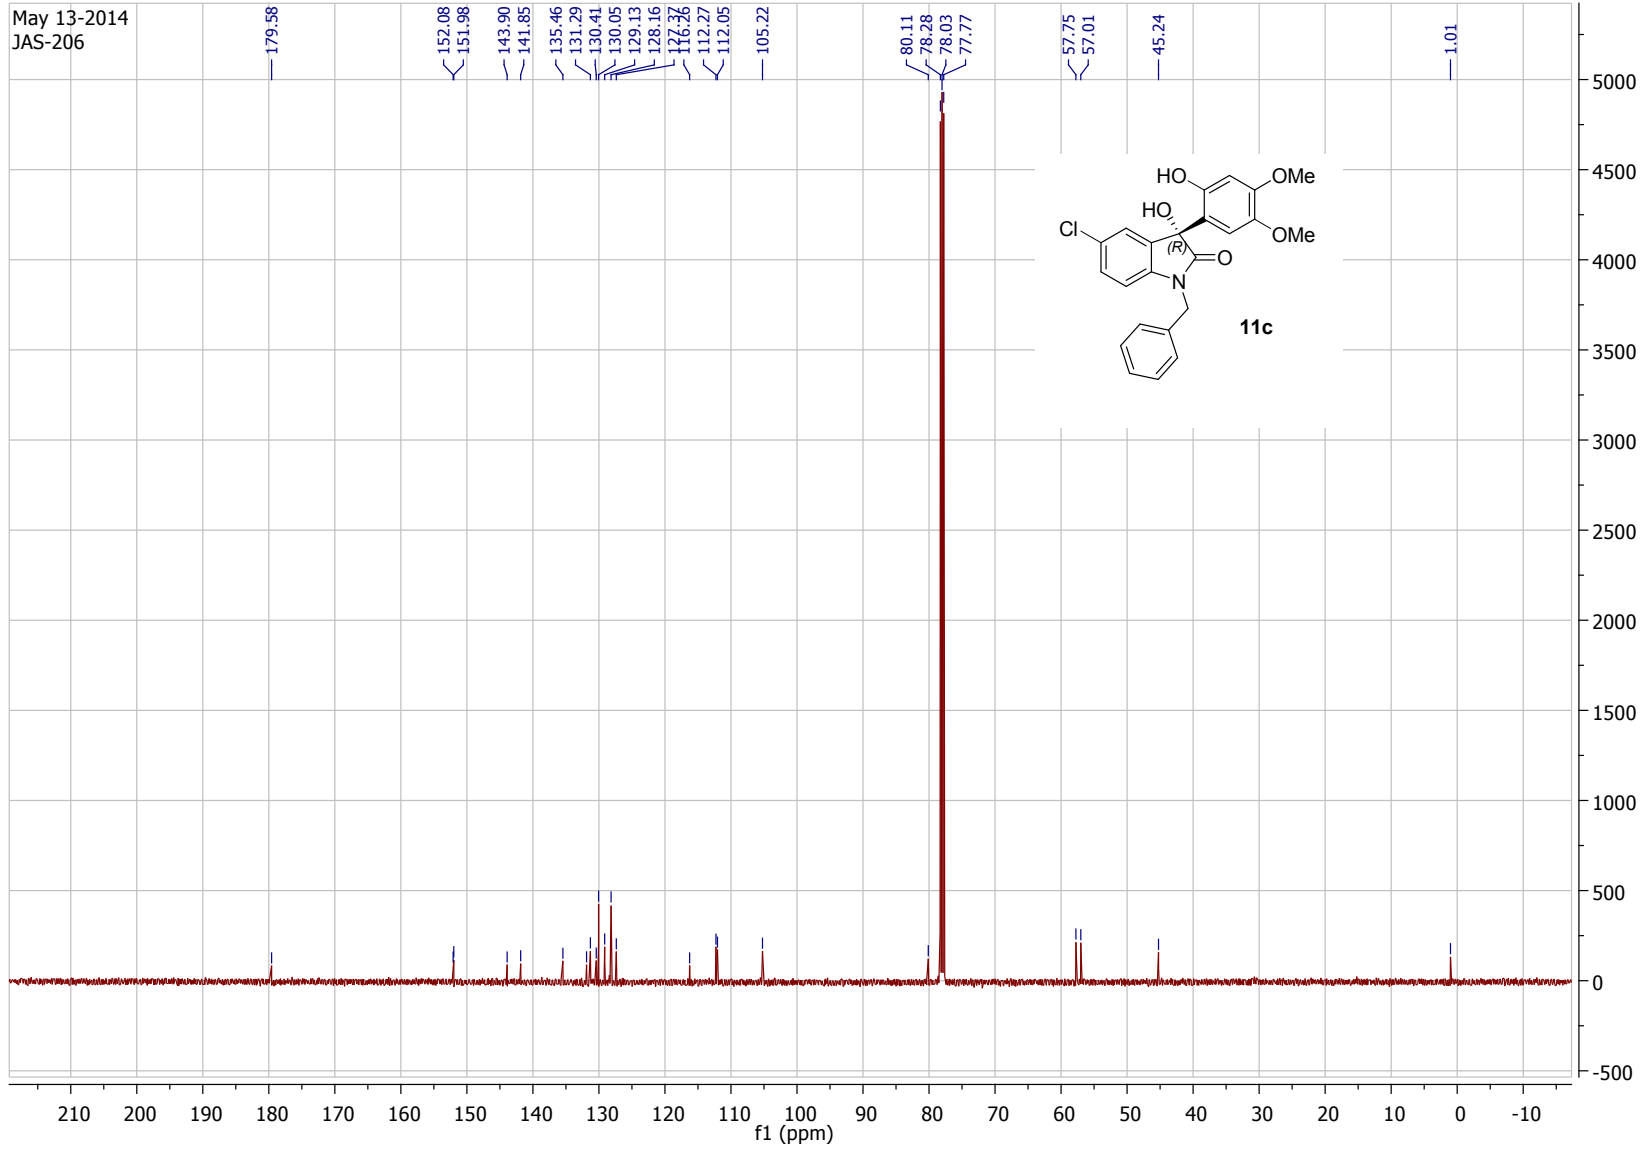

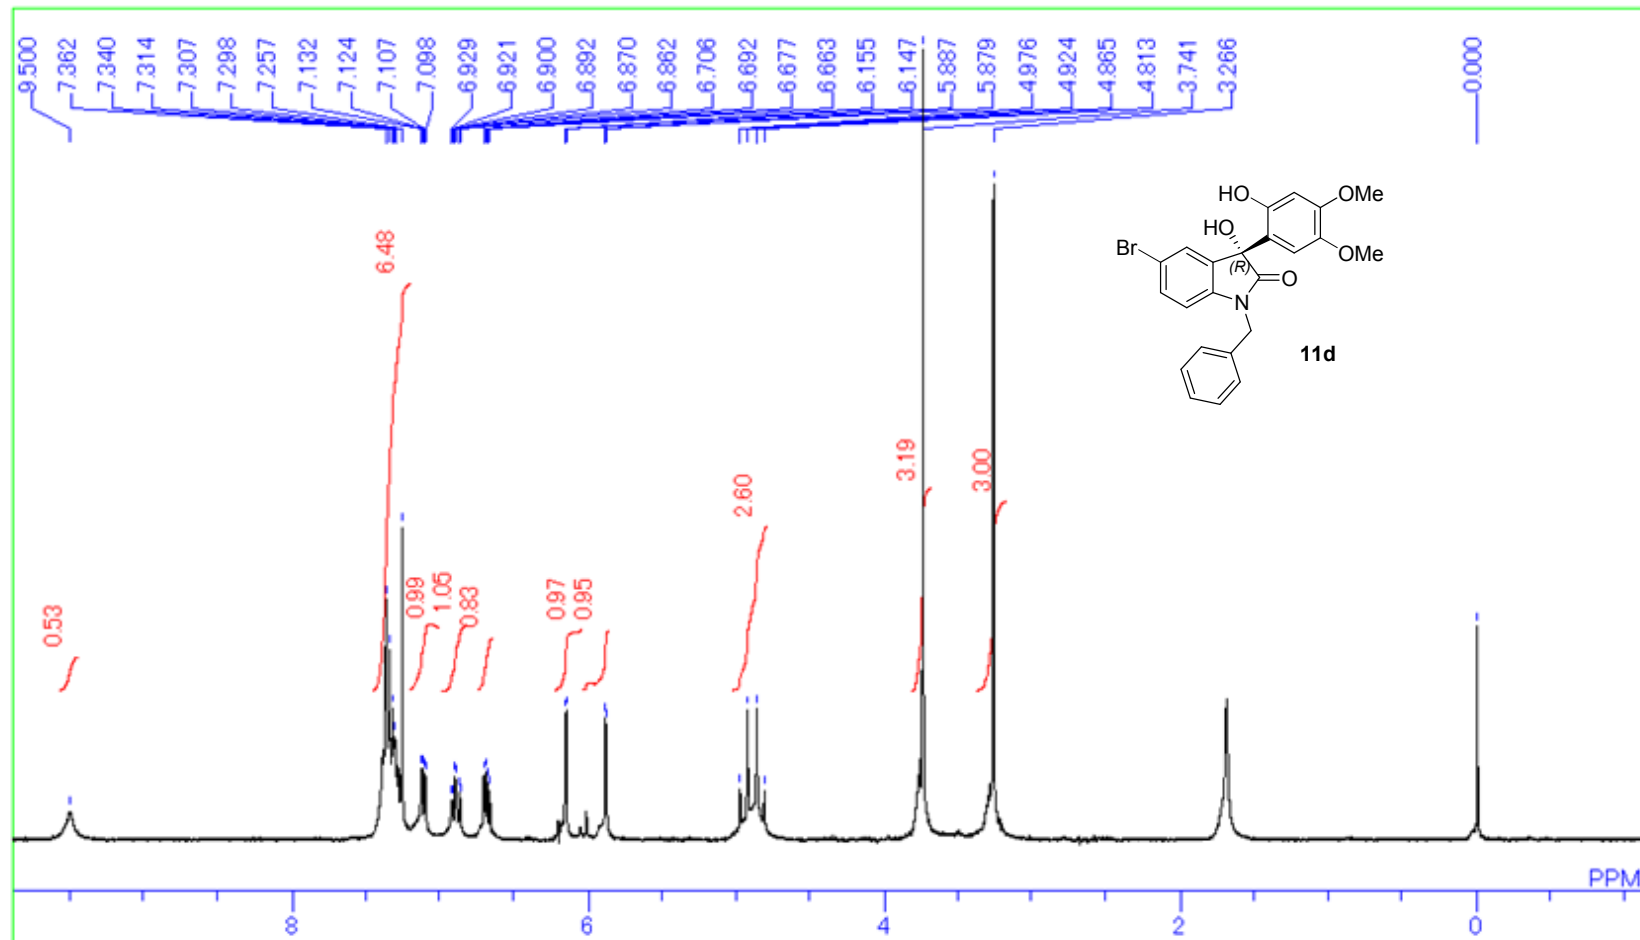

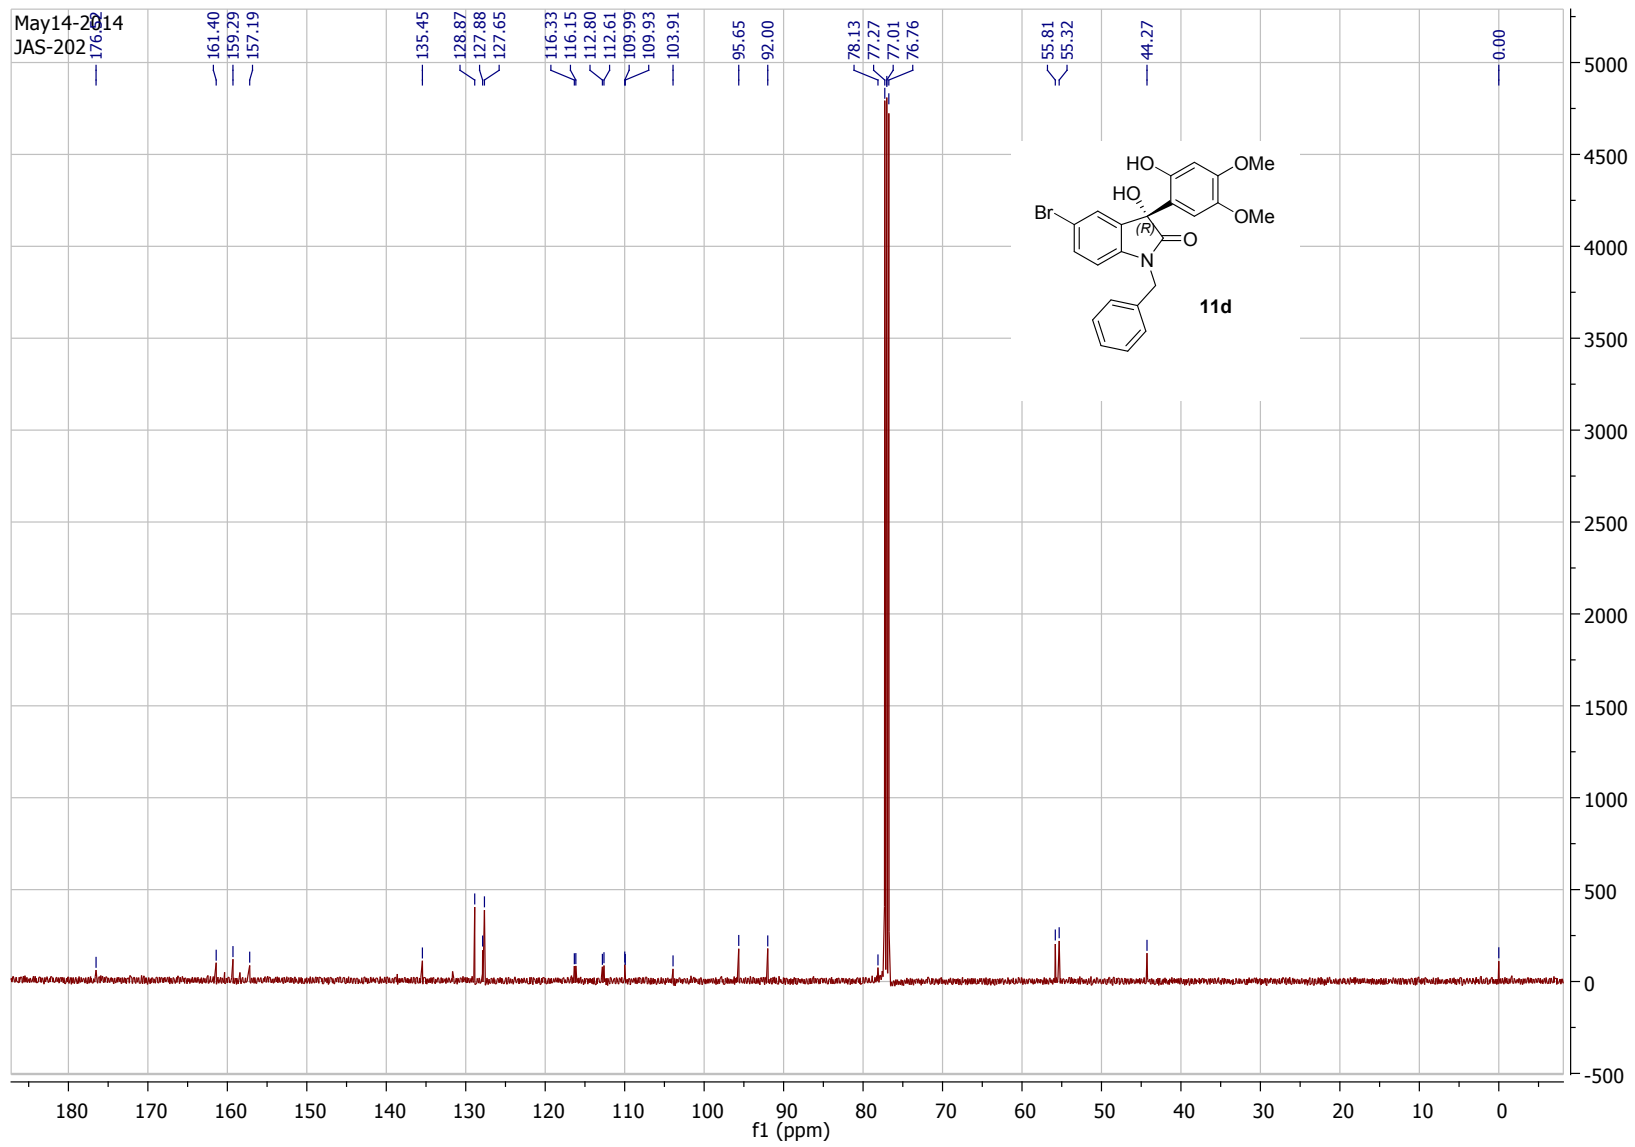

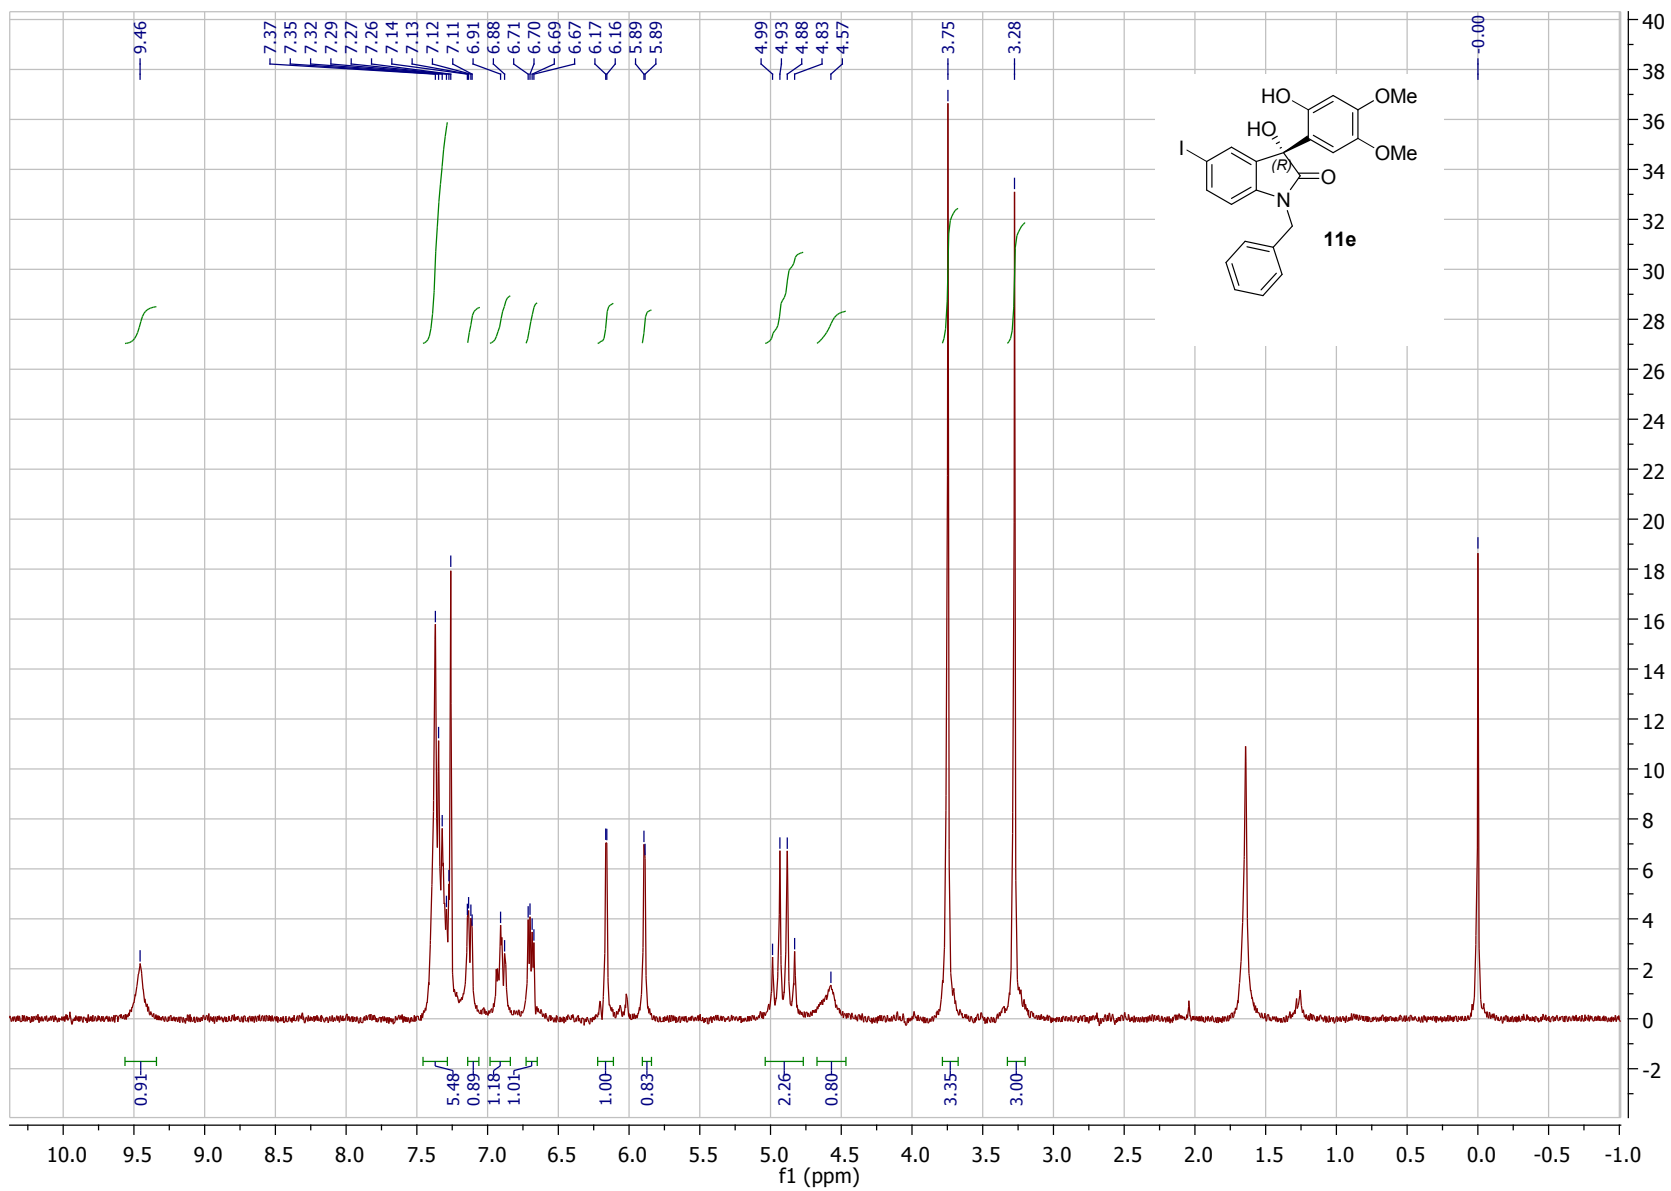

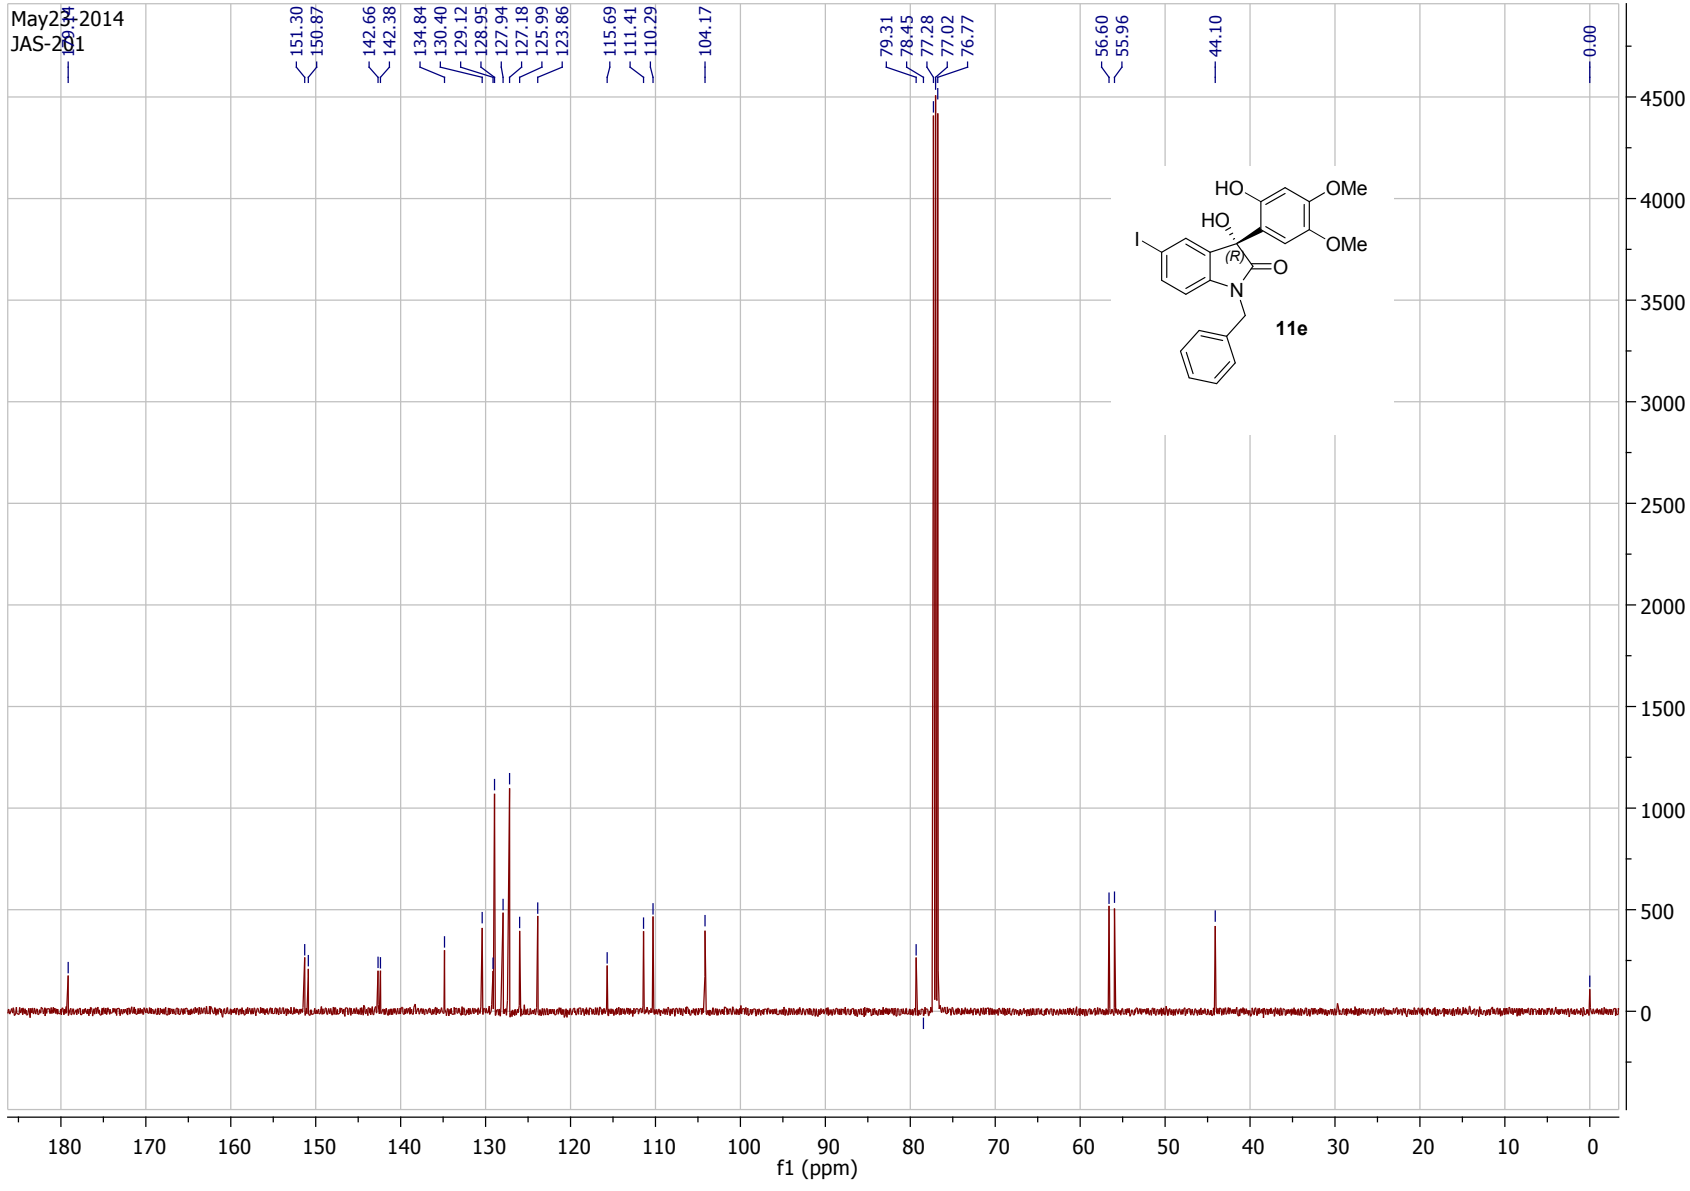

C:\Users\technologies\Desktop\c-

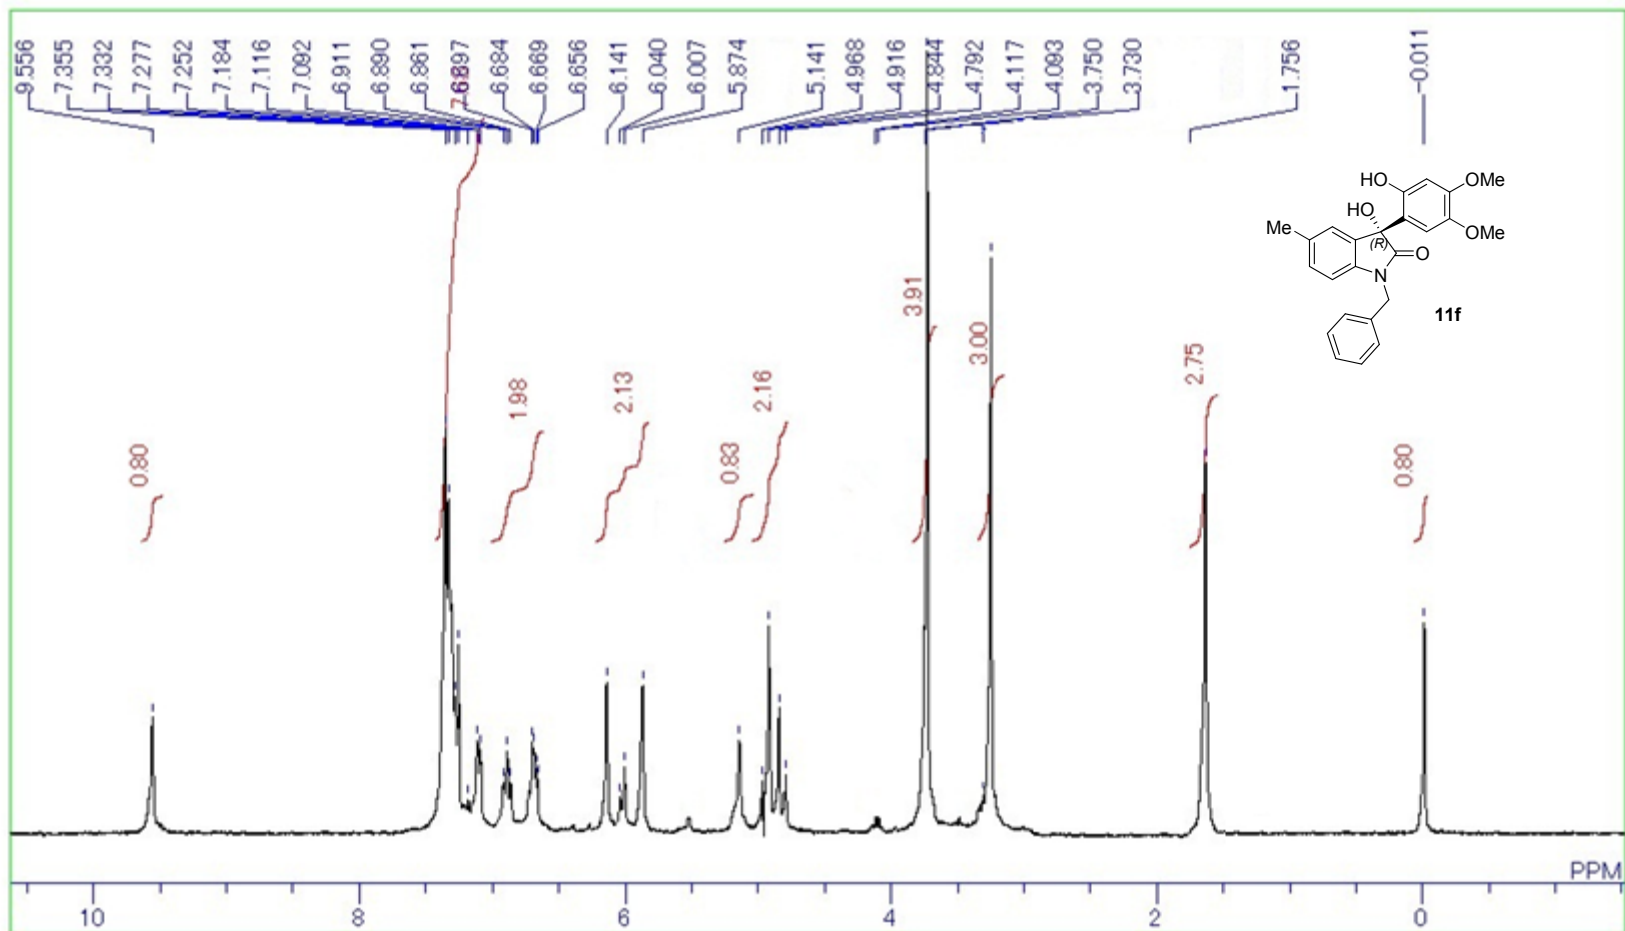



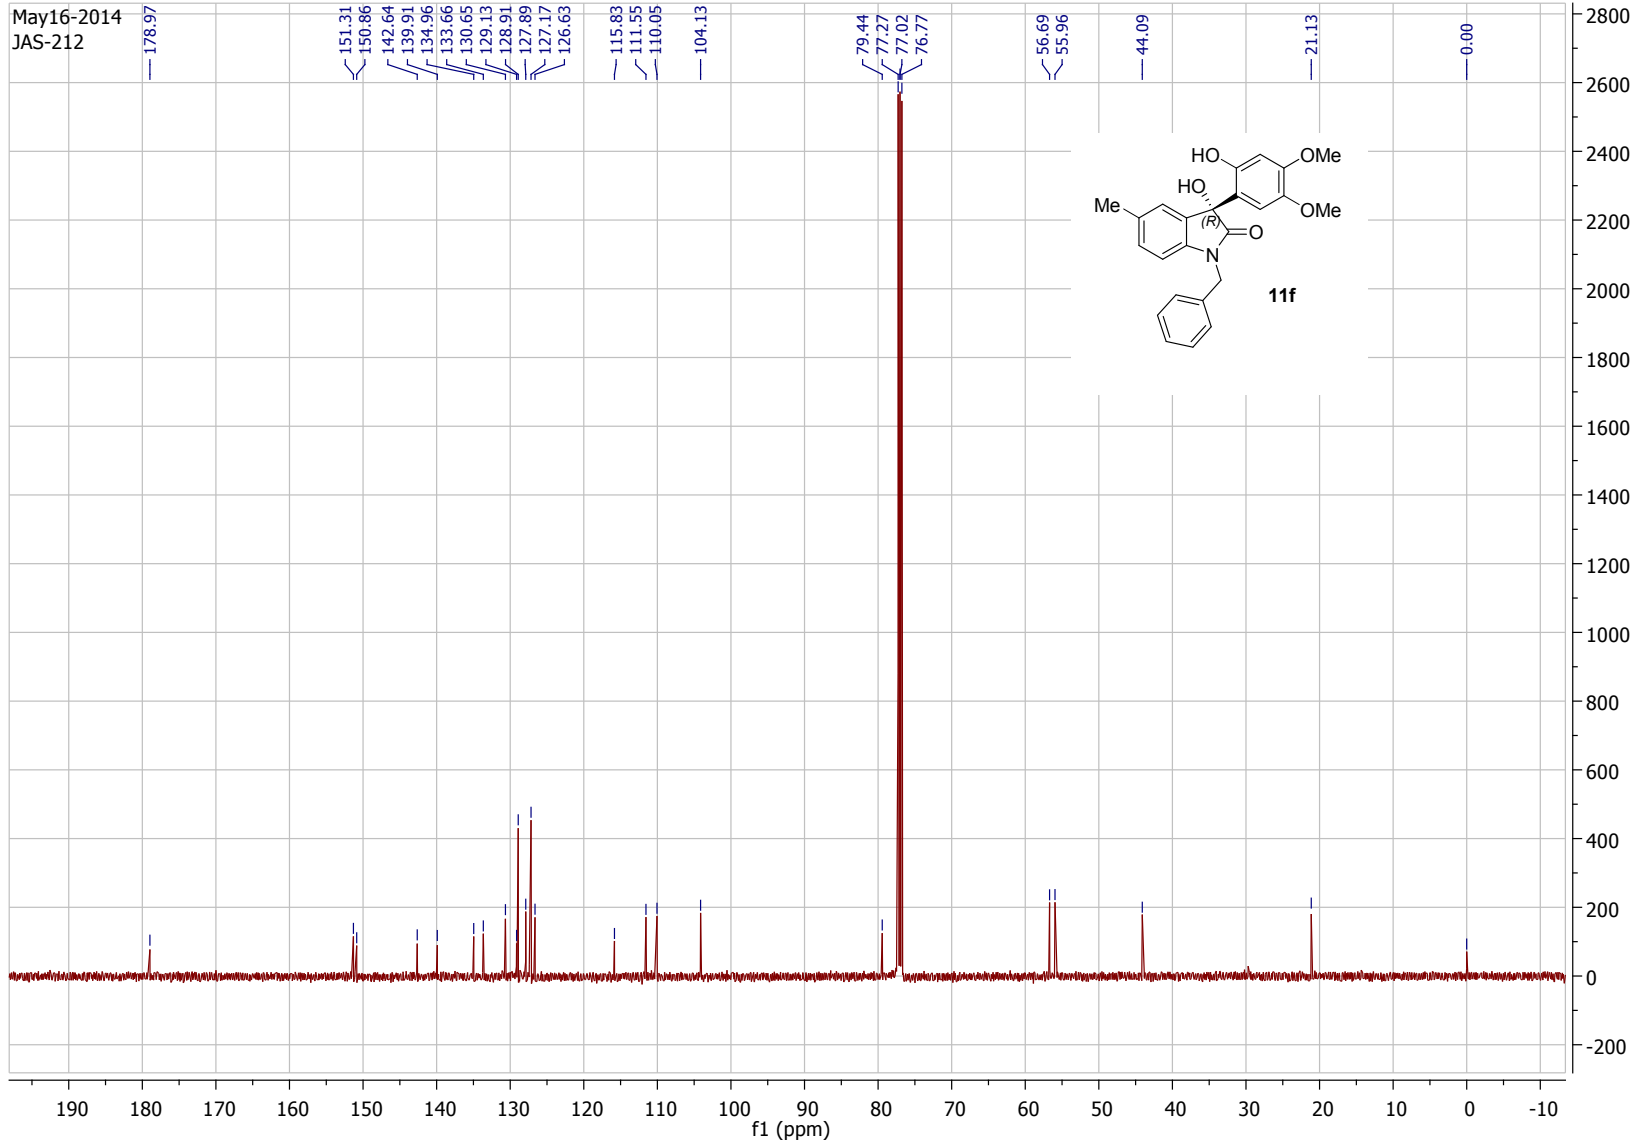

C:\Users\technologies\Desktop\nmrs\Dr\_Chimni\C-JAS2071NON\_E3\_FT.als

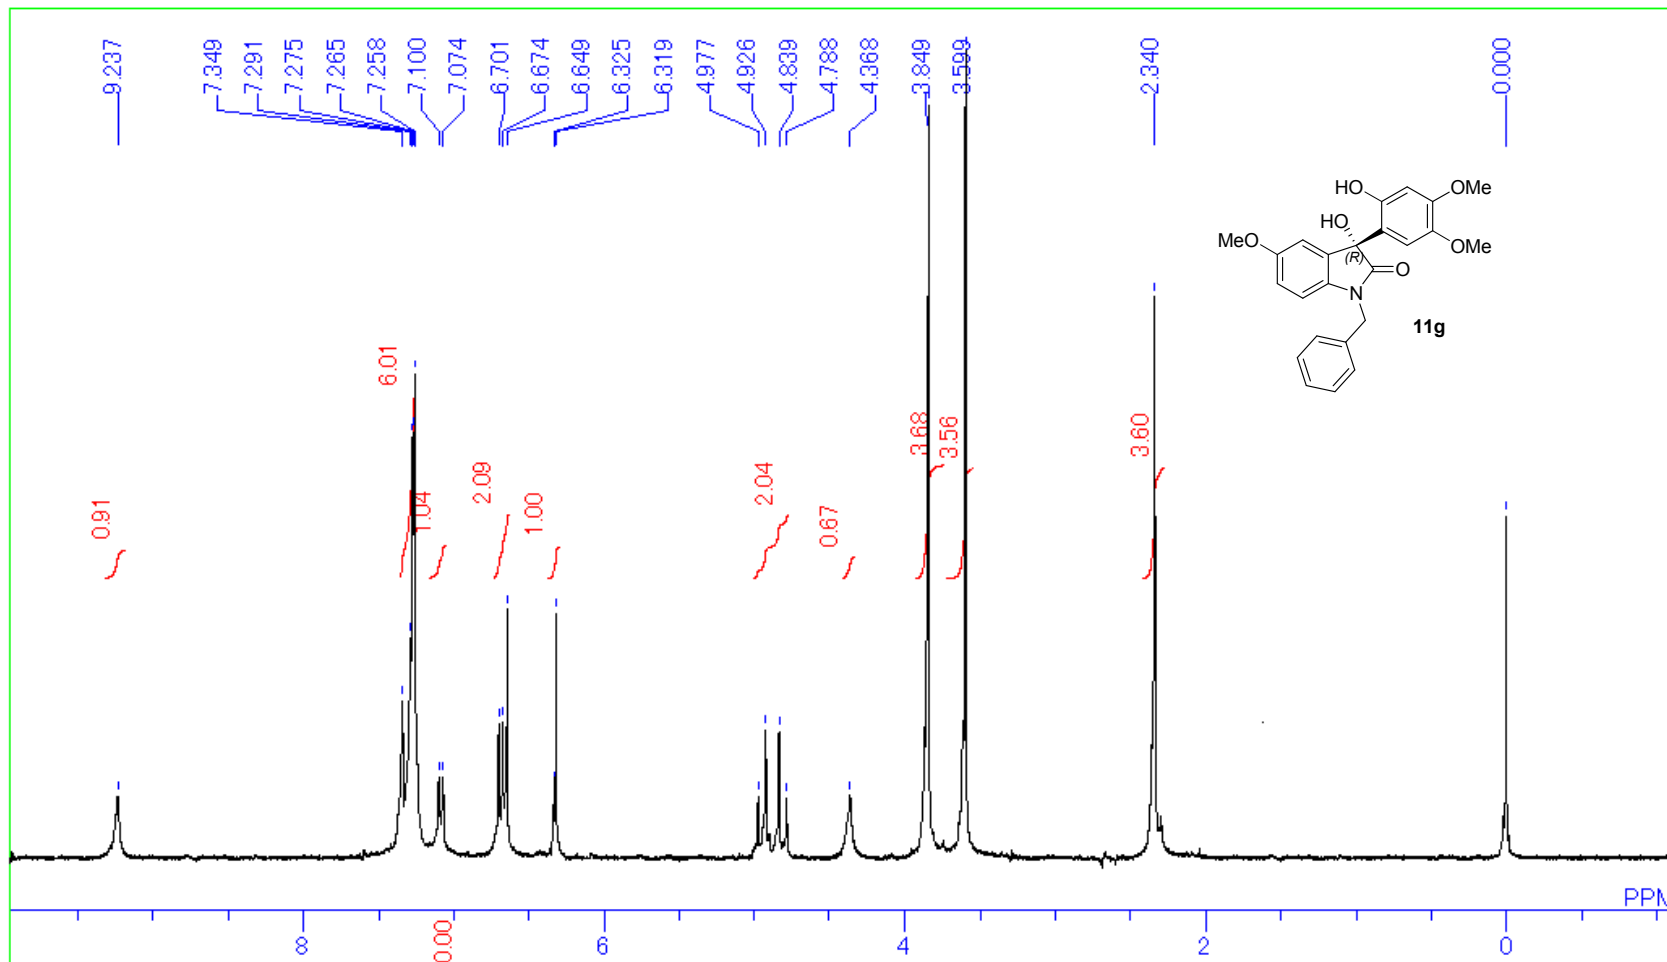

May 13-2014  
JAS-207

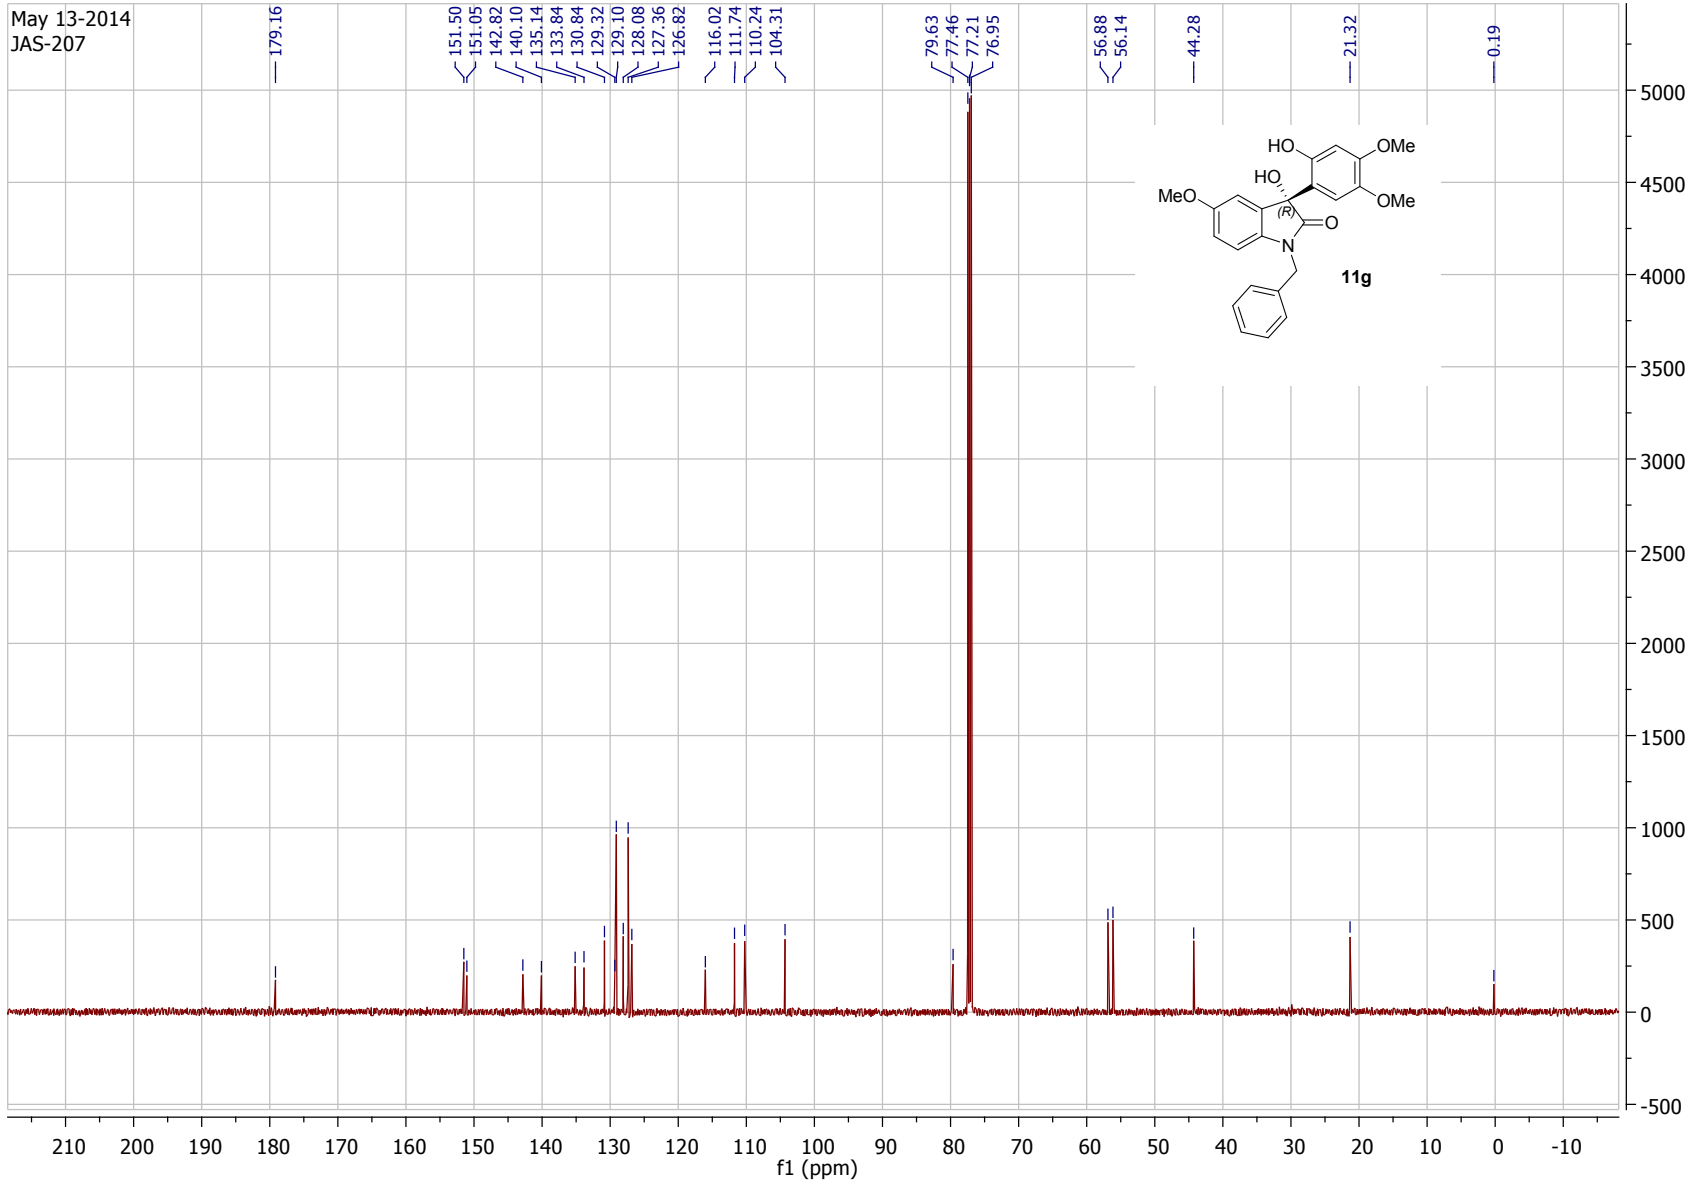

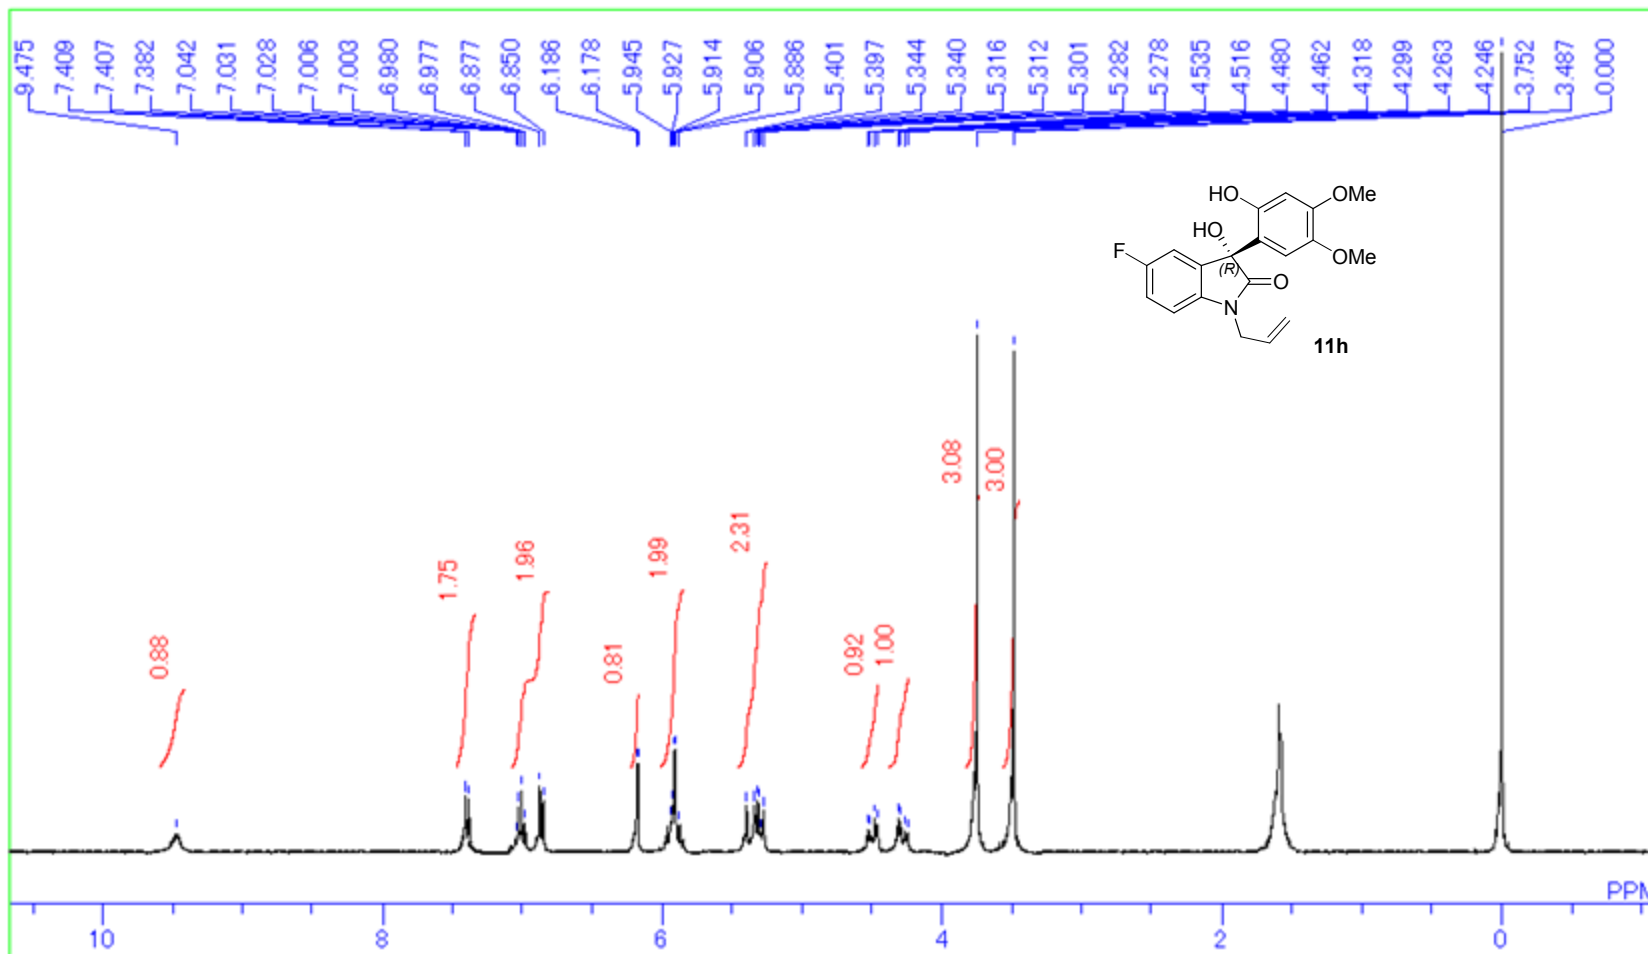

JAS-230

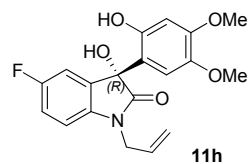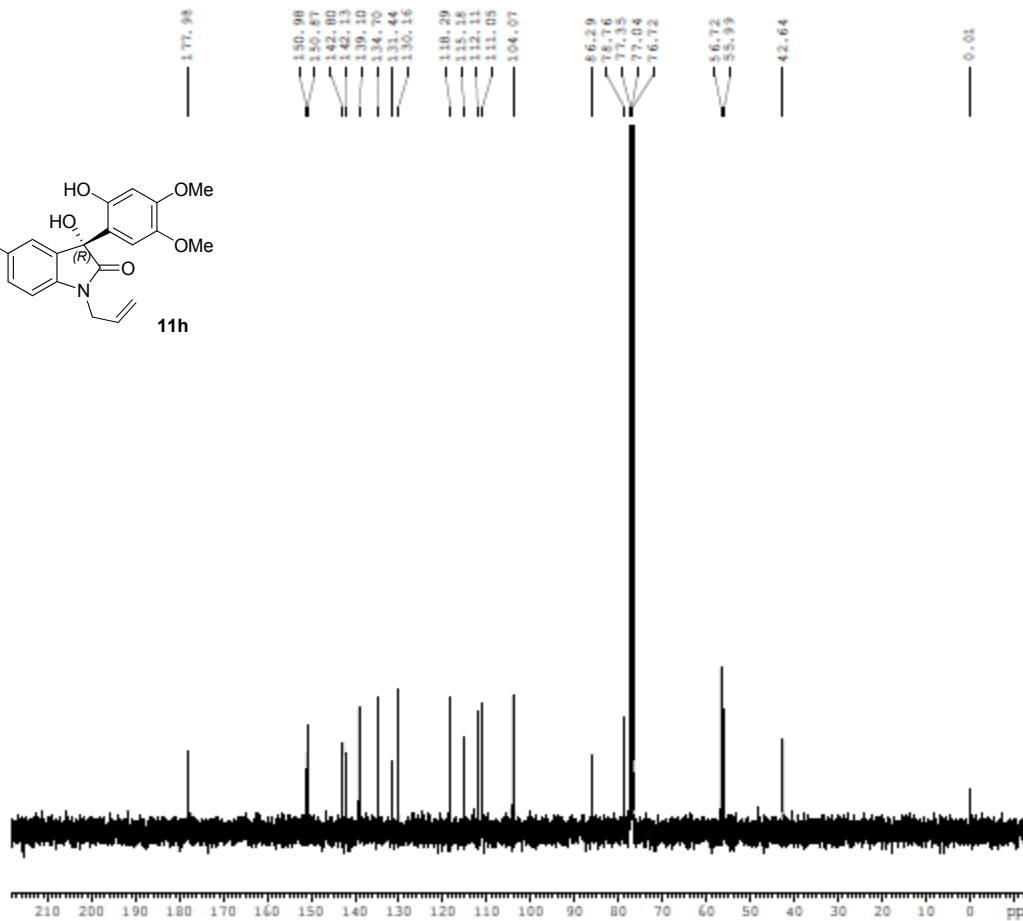

BRUKER  
AVANCE II 400 NMR  
Spectrometer  
SAIF  
Panjab University  
Chandigarh

Current Data Parameters  
NAME Jan24-2014-Administrator  
EXPNO 160  
PROCNO 1

F2 - Acquisition Parameters  
Date\_ 20140125  
Time 2.47  
INSTRUM spect  
PROBHD 5 mm FARGO BB-  
PULPROG zgpg30  
TD 65536  
SOLVENT CDCl3  
NS 512  
DS 4  
SWH 29761.904 Hz  
FIDRES 0.454131 Hz  
AQ 1.1010548 sec  
RG 645  
DM 16.800 usec  
DE 6.00 usec  
TE 295.2 K  
D1 2.00000000 sec  
d11 0.03000000 sec  
DELTA 1.89999998 sec  
TD0 1

CHANNEL F1  
NUC1 13C  
P1 9.60 usec  
PL1 -2.00 dB  
SFO1 100.6228298 MHz

CHANNEL F2  
CPOPRG2 waltz16  
NUC2 1H  
PCPD2 80.00 usec  
PL2 -3.00 dB  
PL12 14.31 dB  
PL13 18.00 dB  
SFO2 400.1316005 MHz

F2 - Processing parameters  
SI 32768  
SF 100.6127690 MHz  
WDW EM  
SSB 0  
LB 1.00 Hz  
GB 0  
PC 1.40

avtar\_saifpu@yahoo.co.in

C:\Users\technologies\Desktop\C

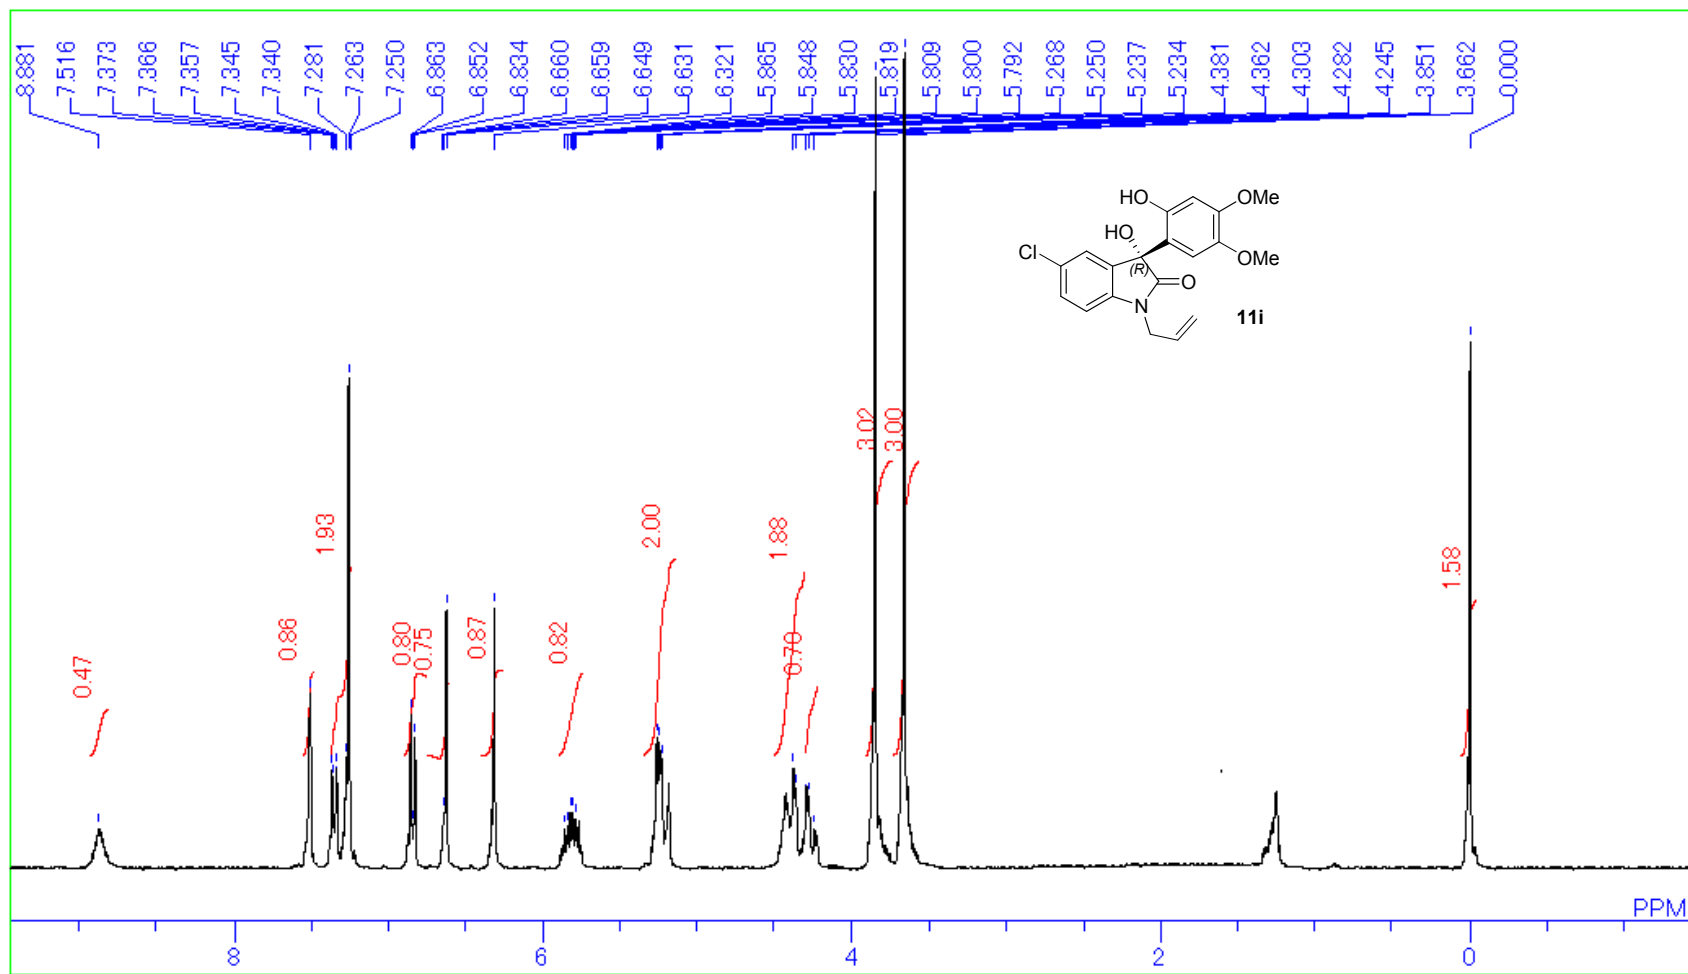

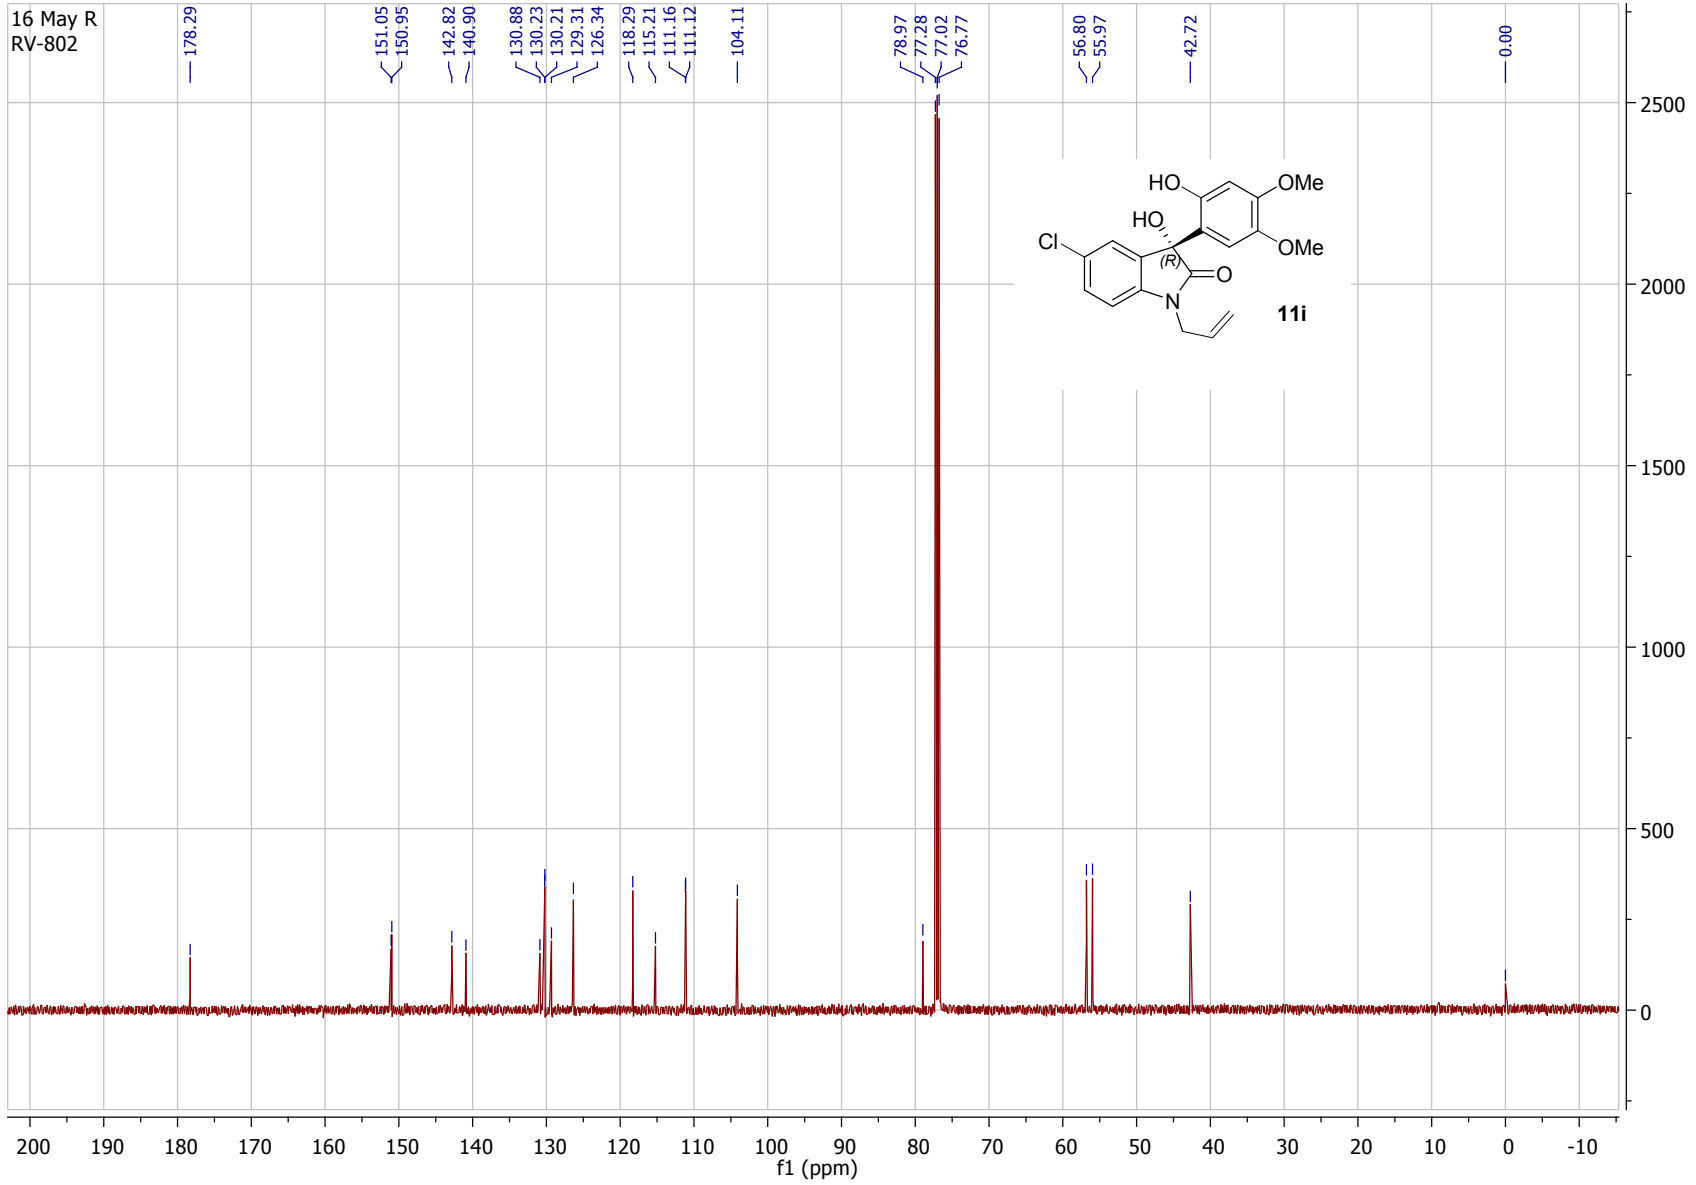

C:\Users\technologies\Desktop\nmrs\Dr\_Chimni\CJAS2261NON\_E7\_FT.als

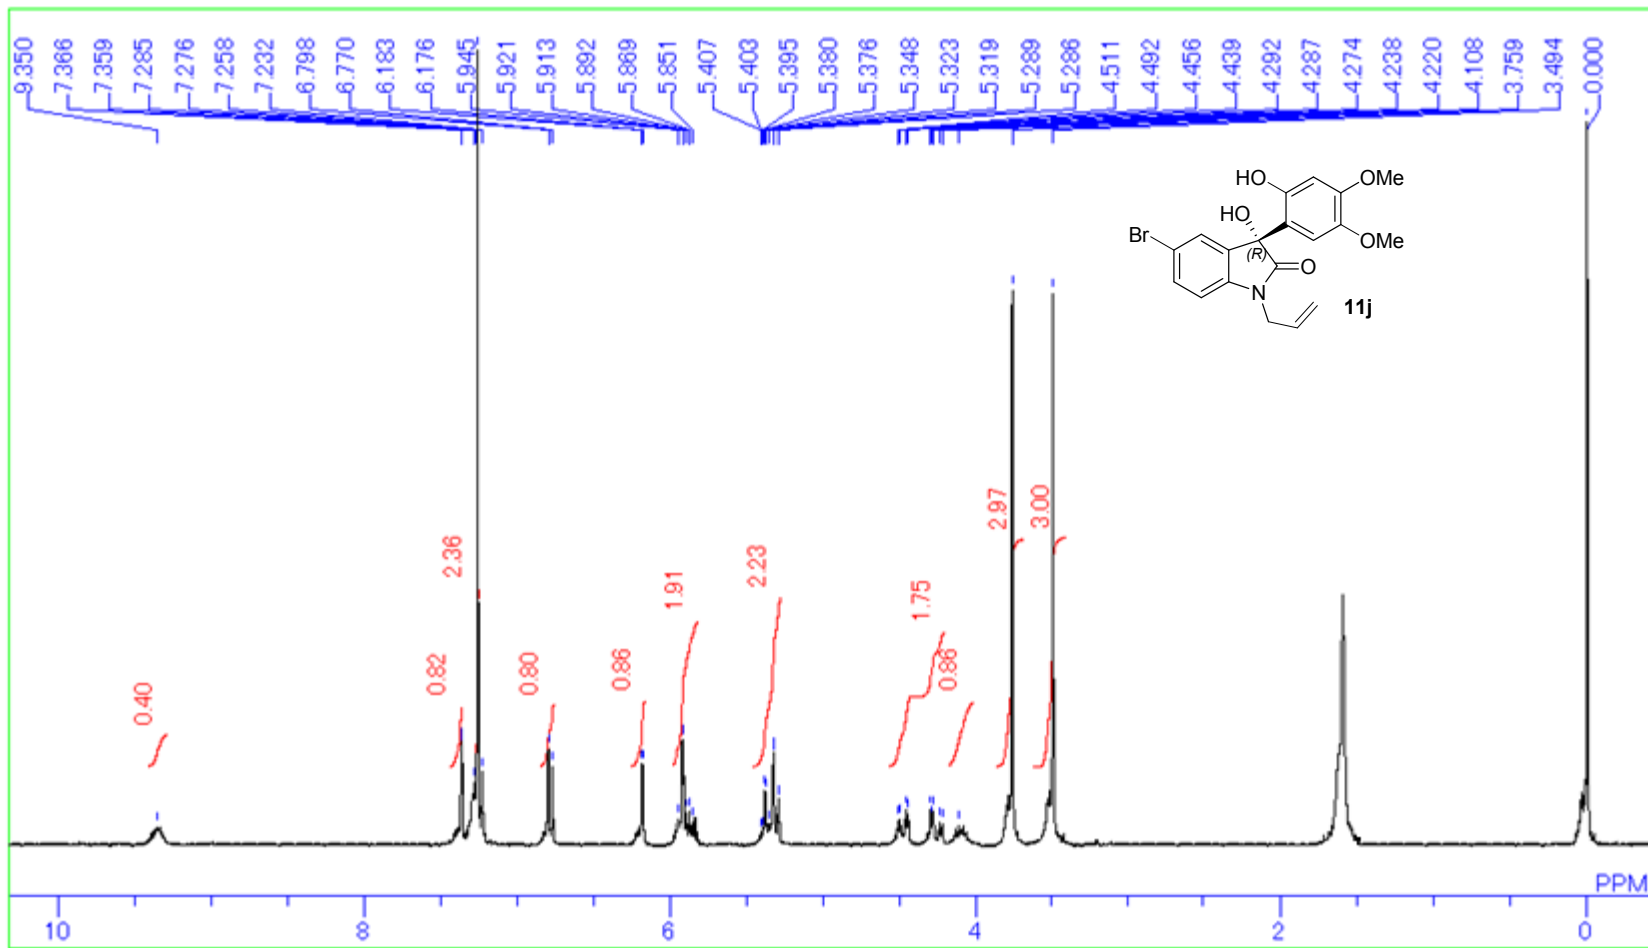



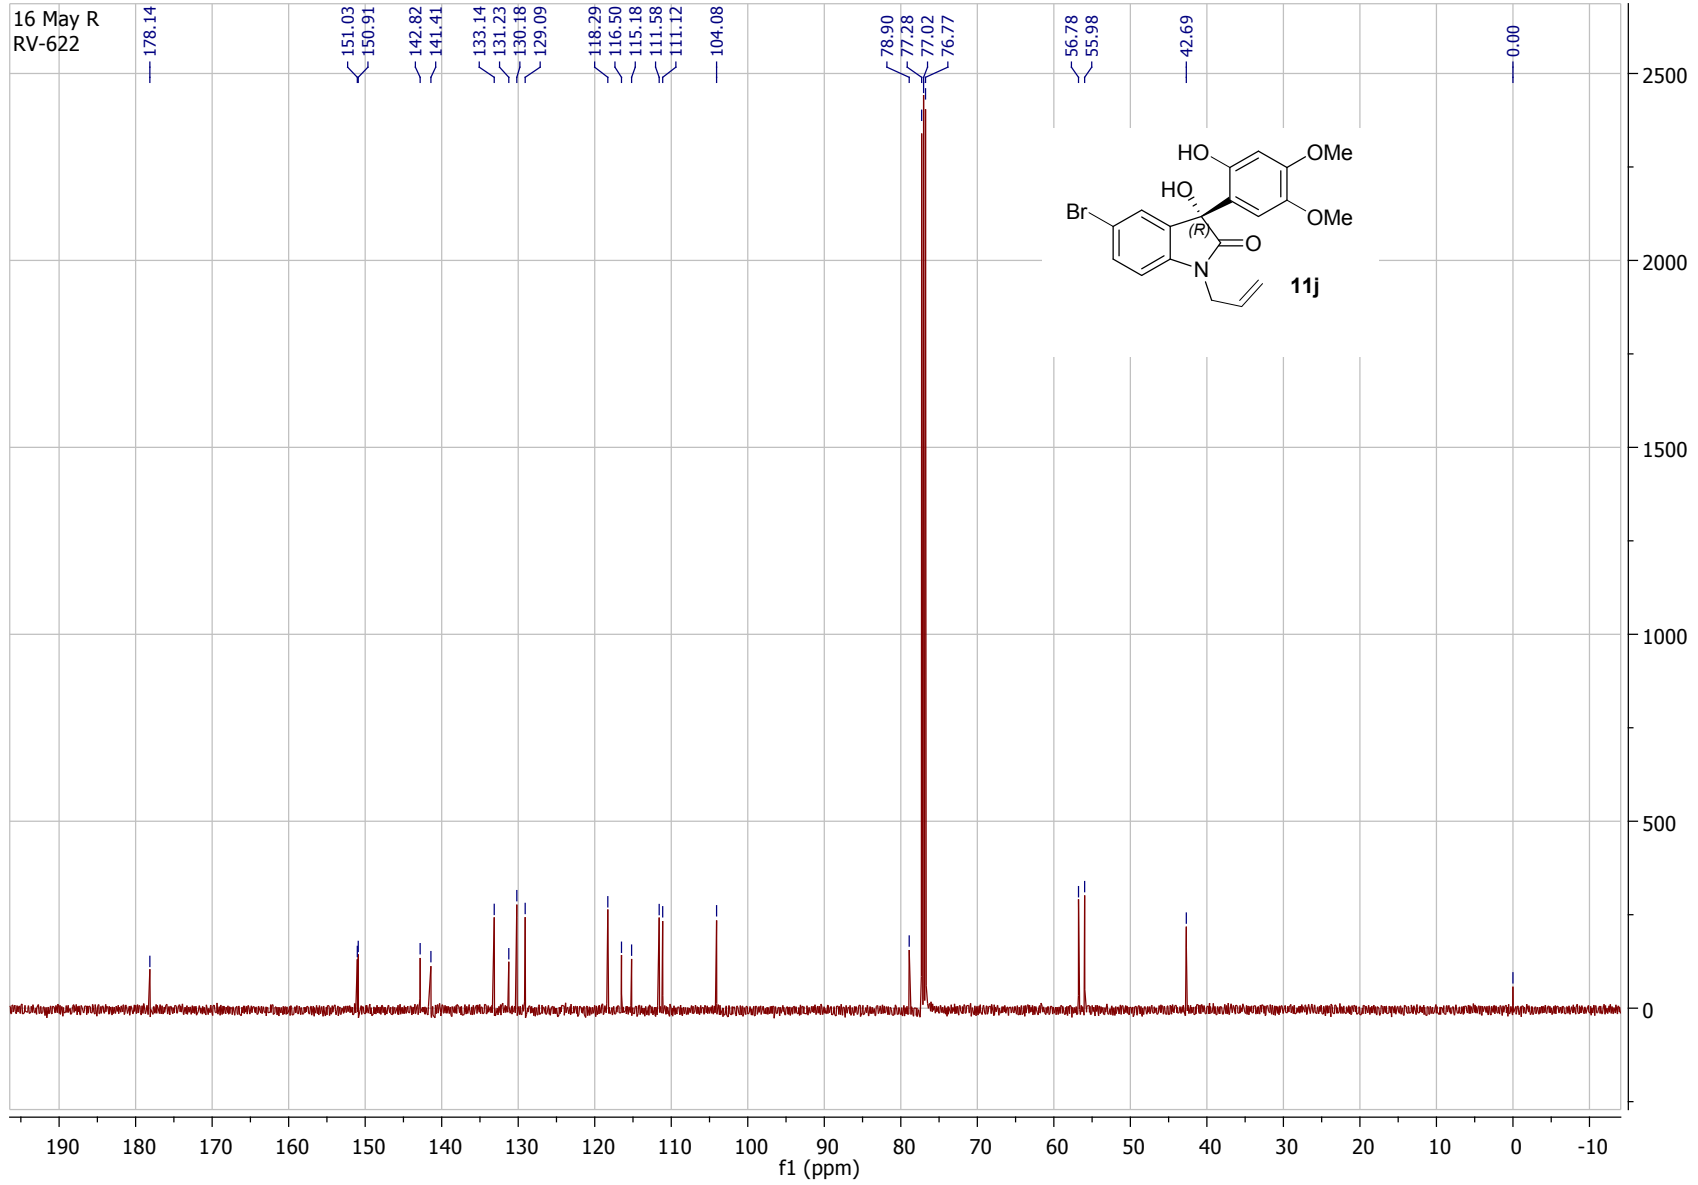

C:\Users\technologies\Desktop\C

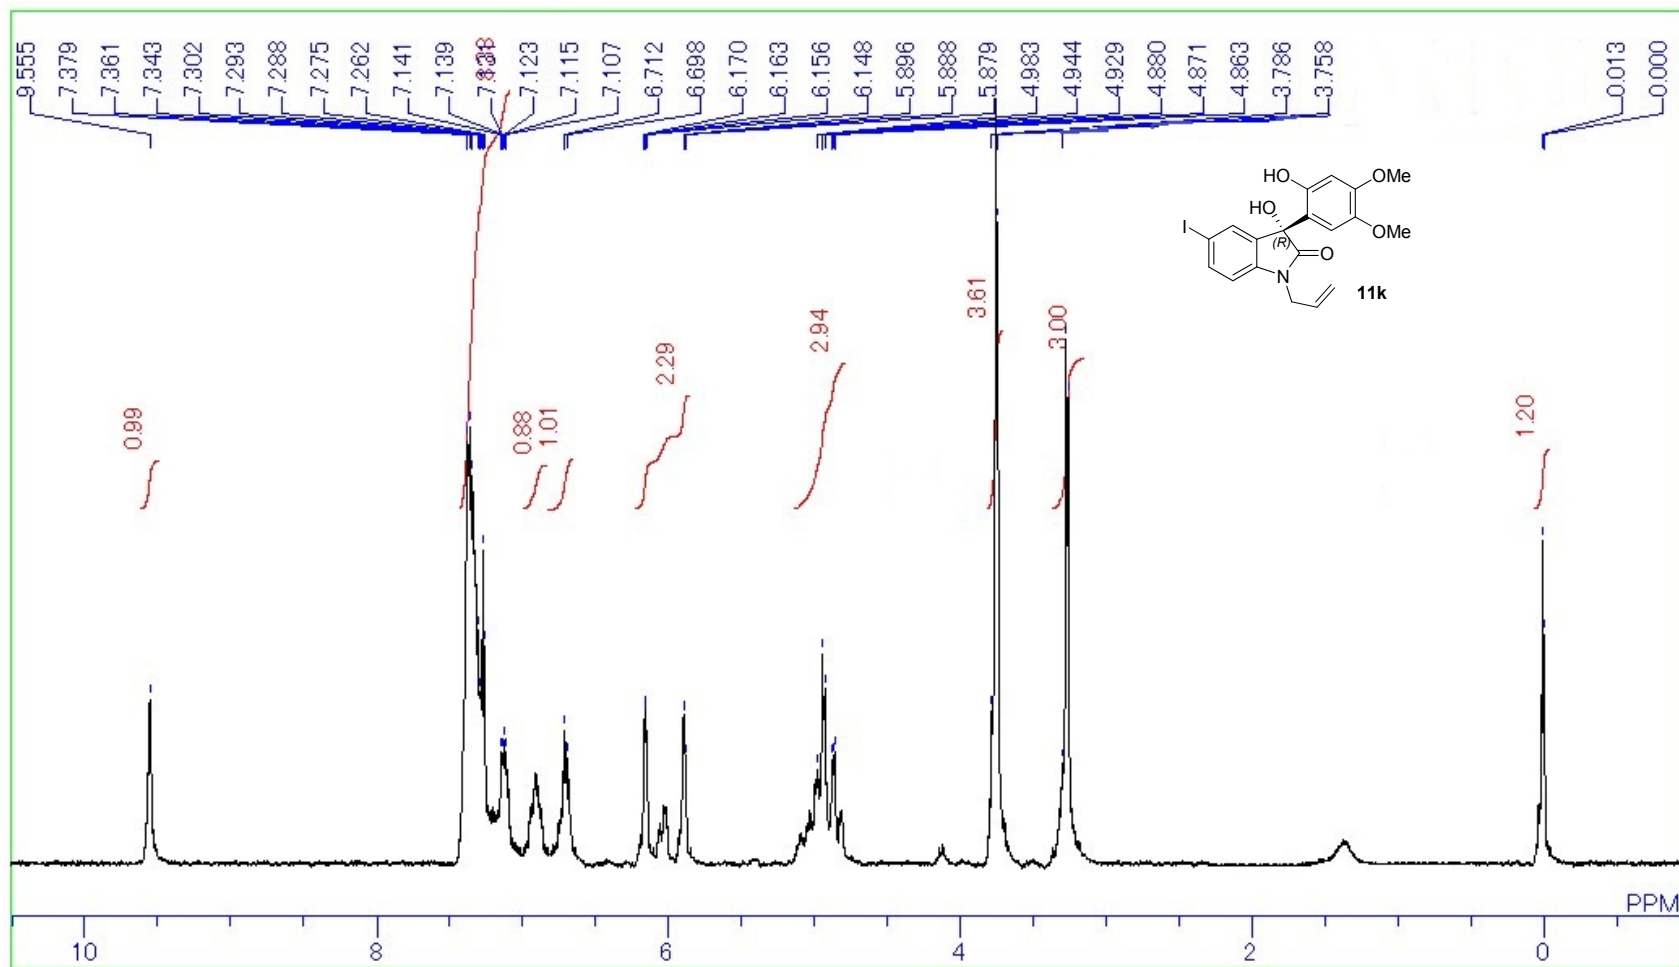

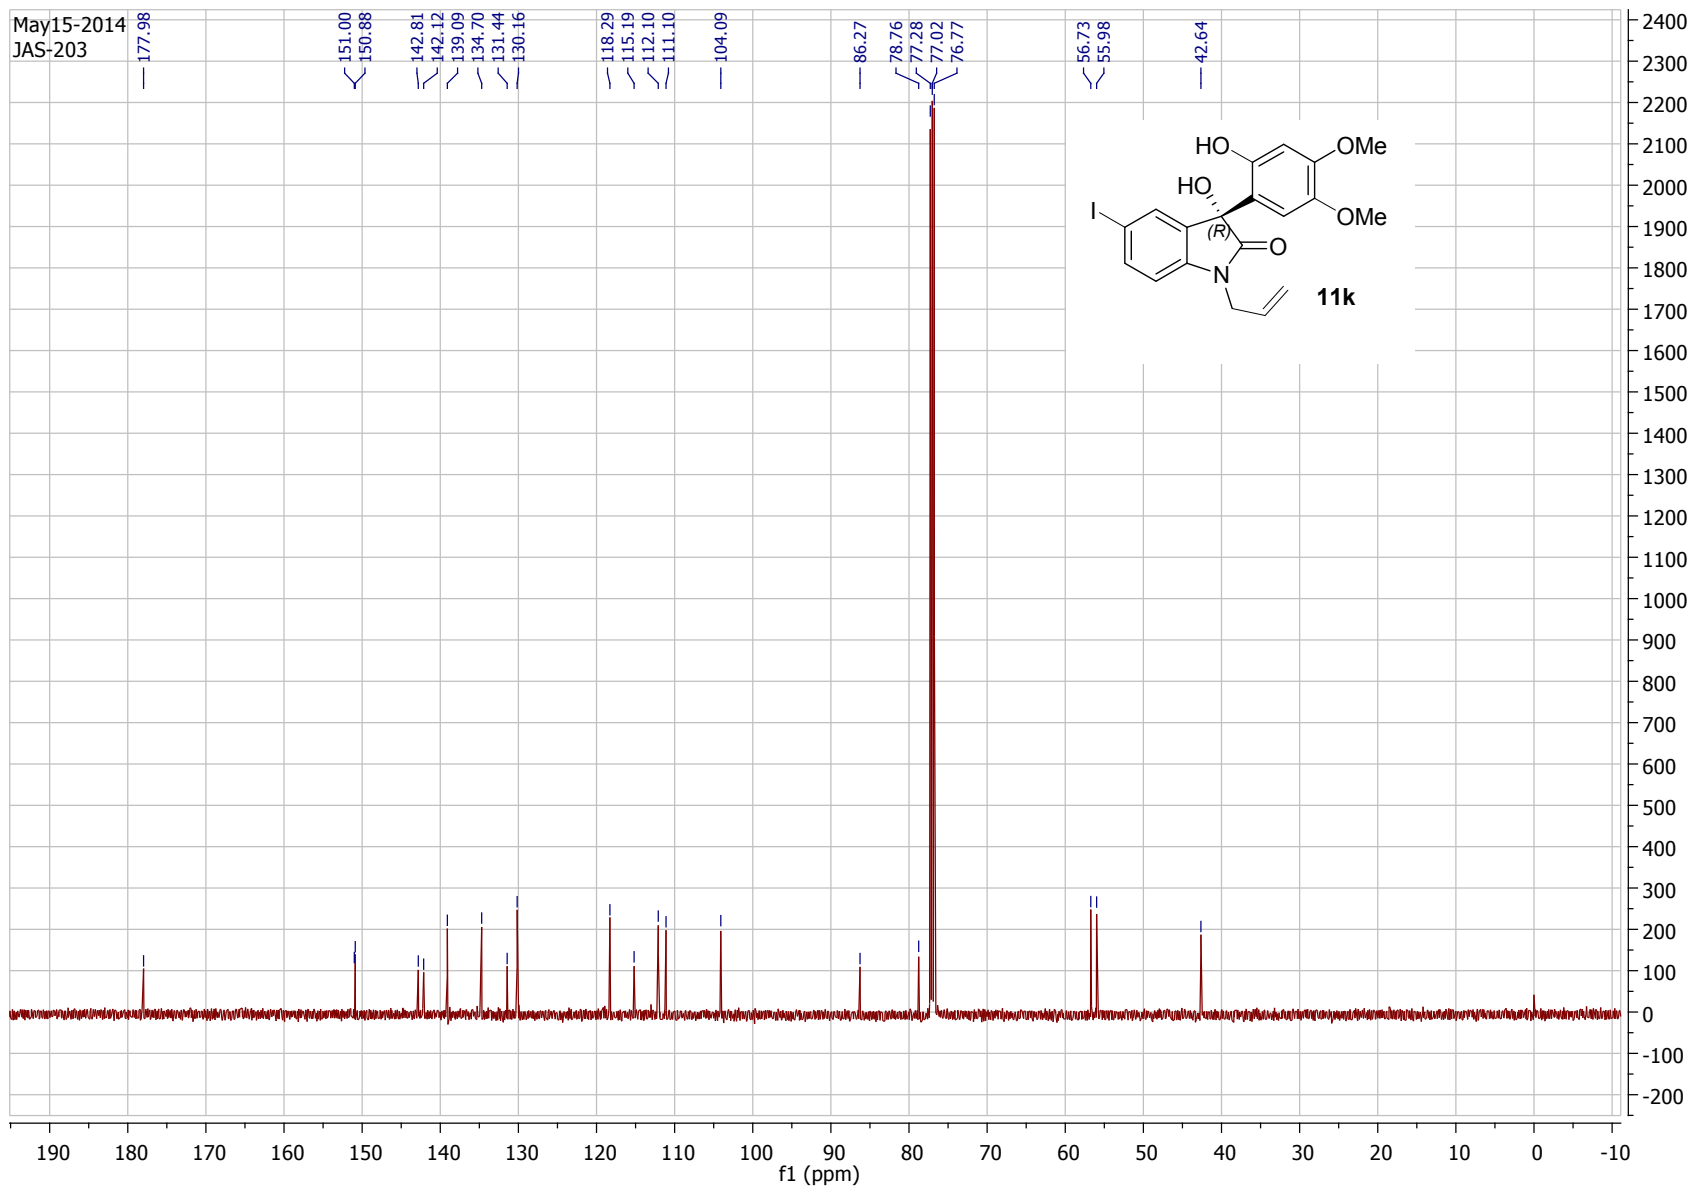

SID 29 oct 2014  
SID-CROTYL

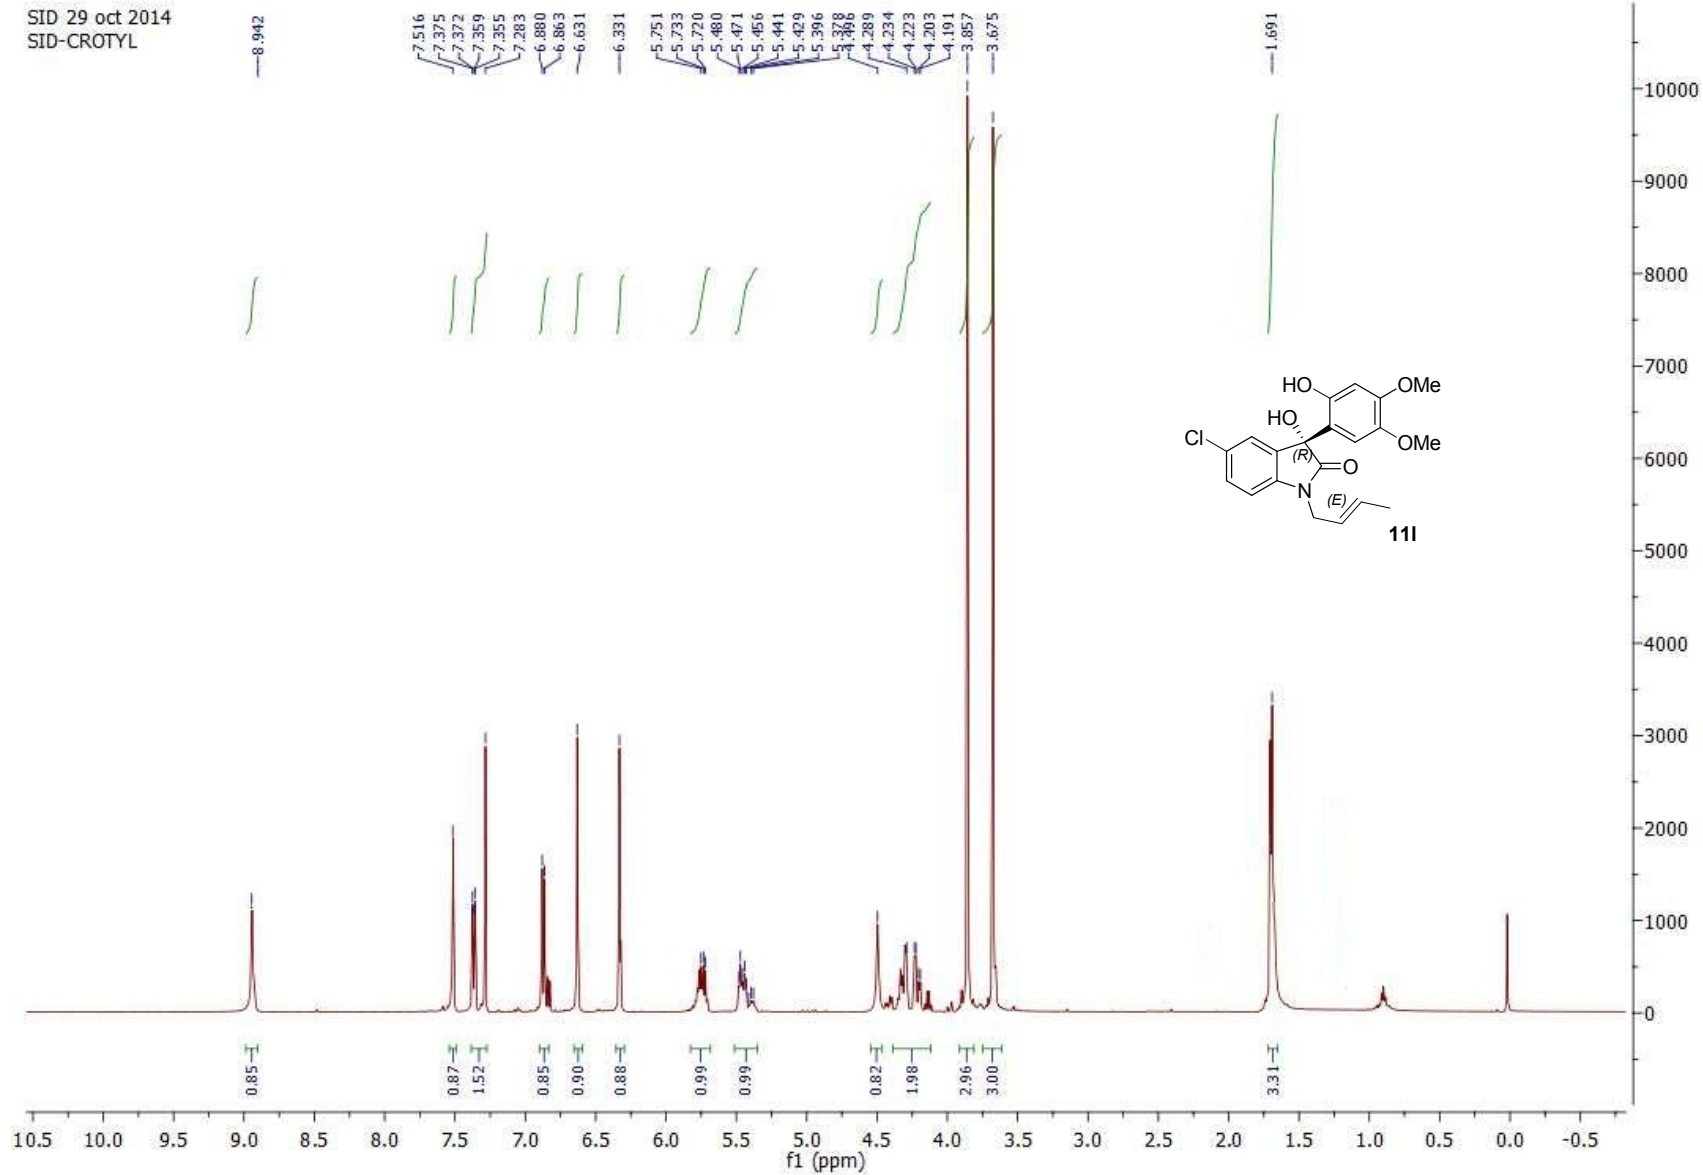

SID 29 oct 2014  
SID-CROTYL

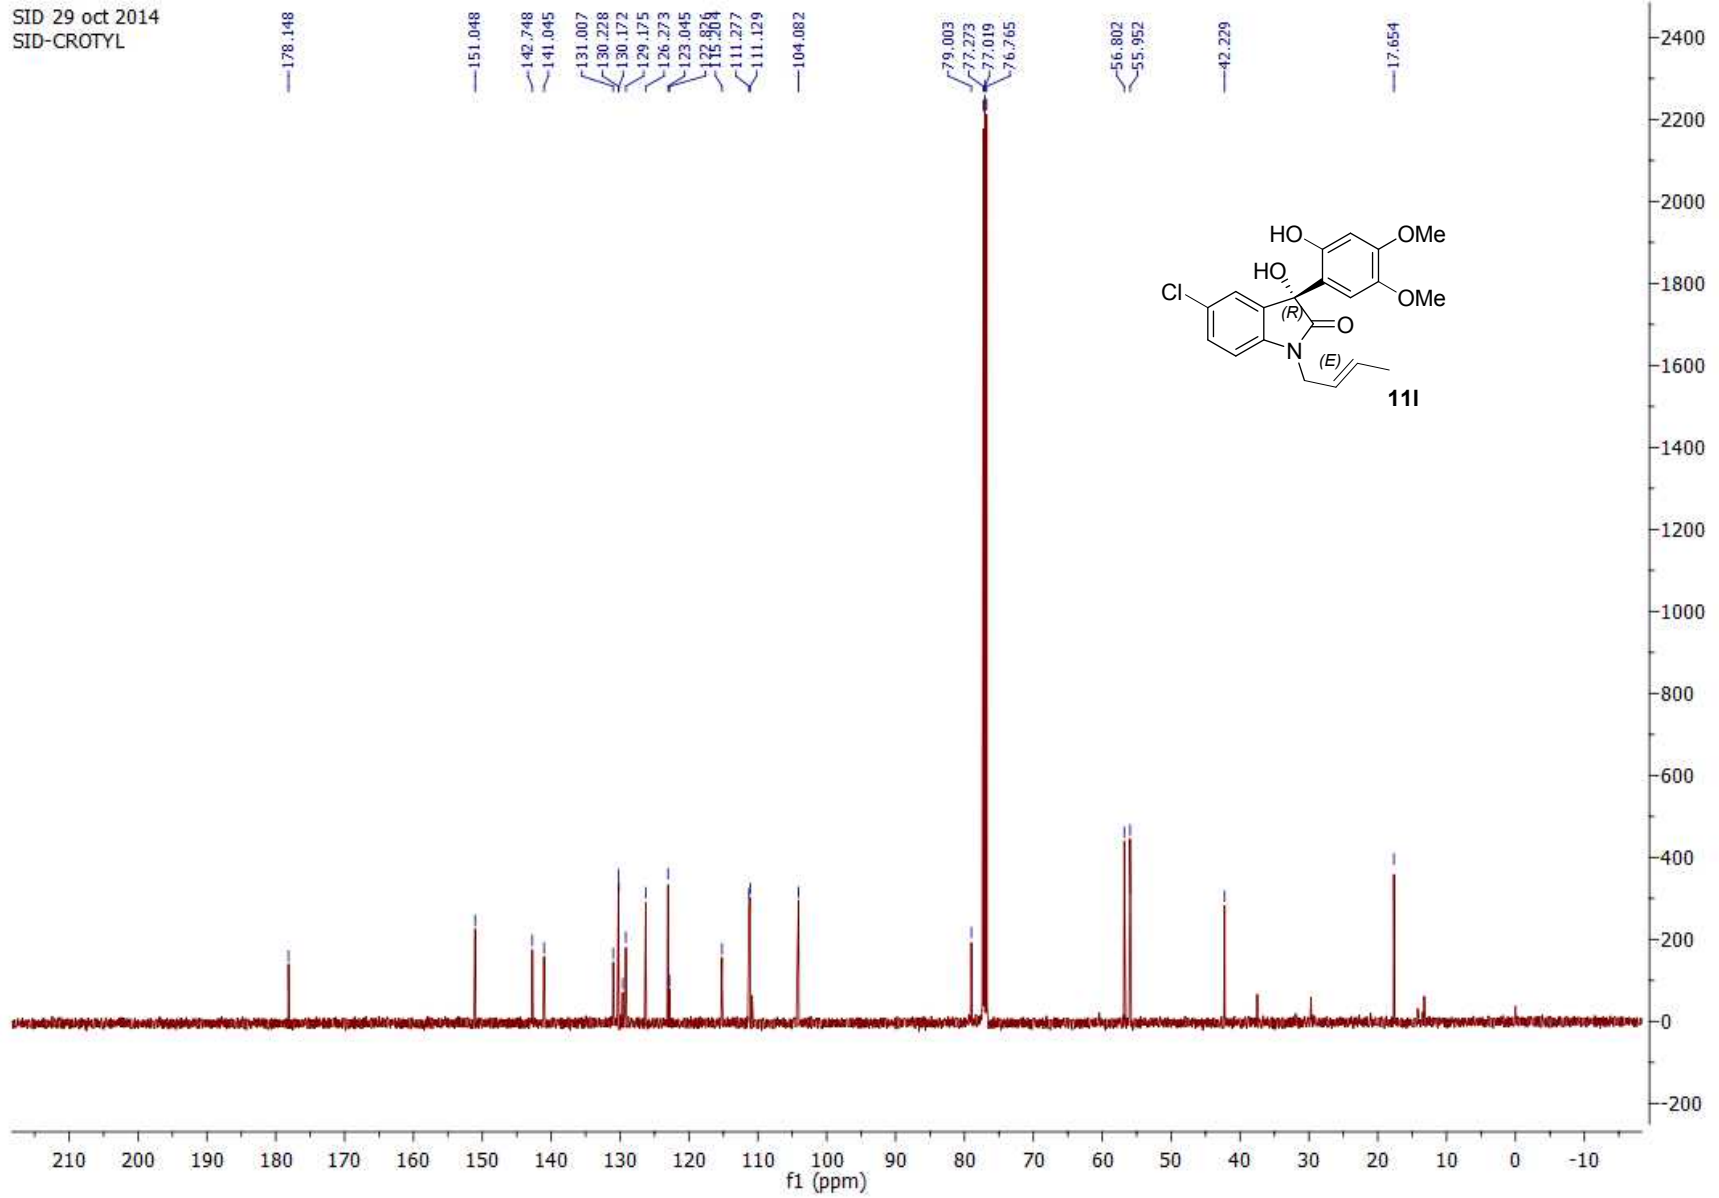

C:\Users\technologies\Desktop\indoles\all DMP data\New folder\nmr dmp phenols\Dr\_Chimni\JAS231.als

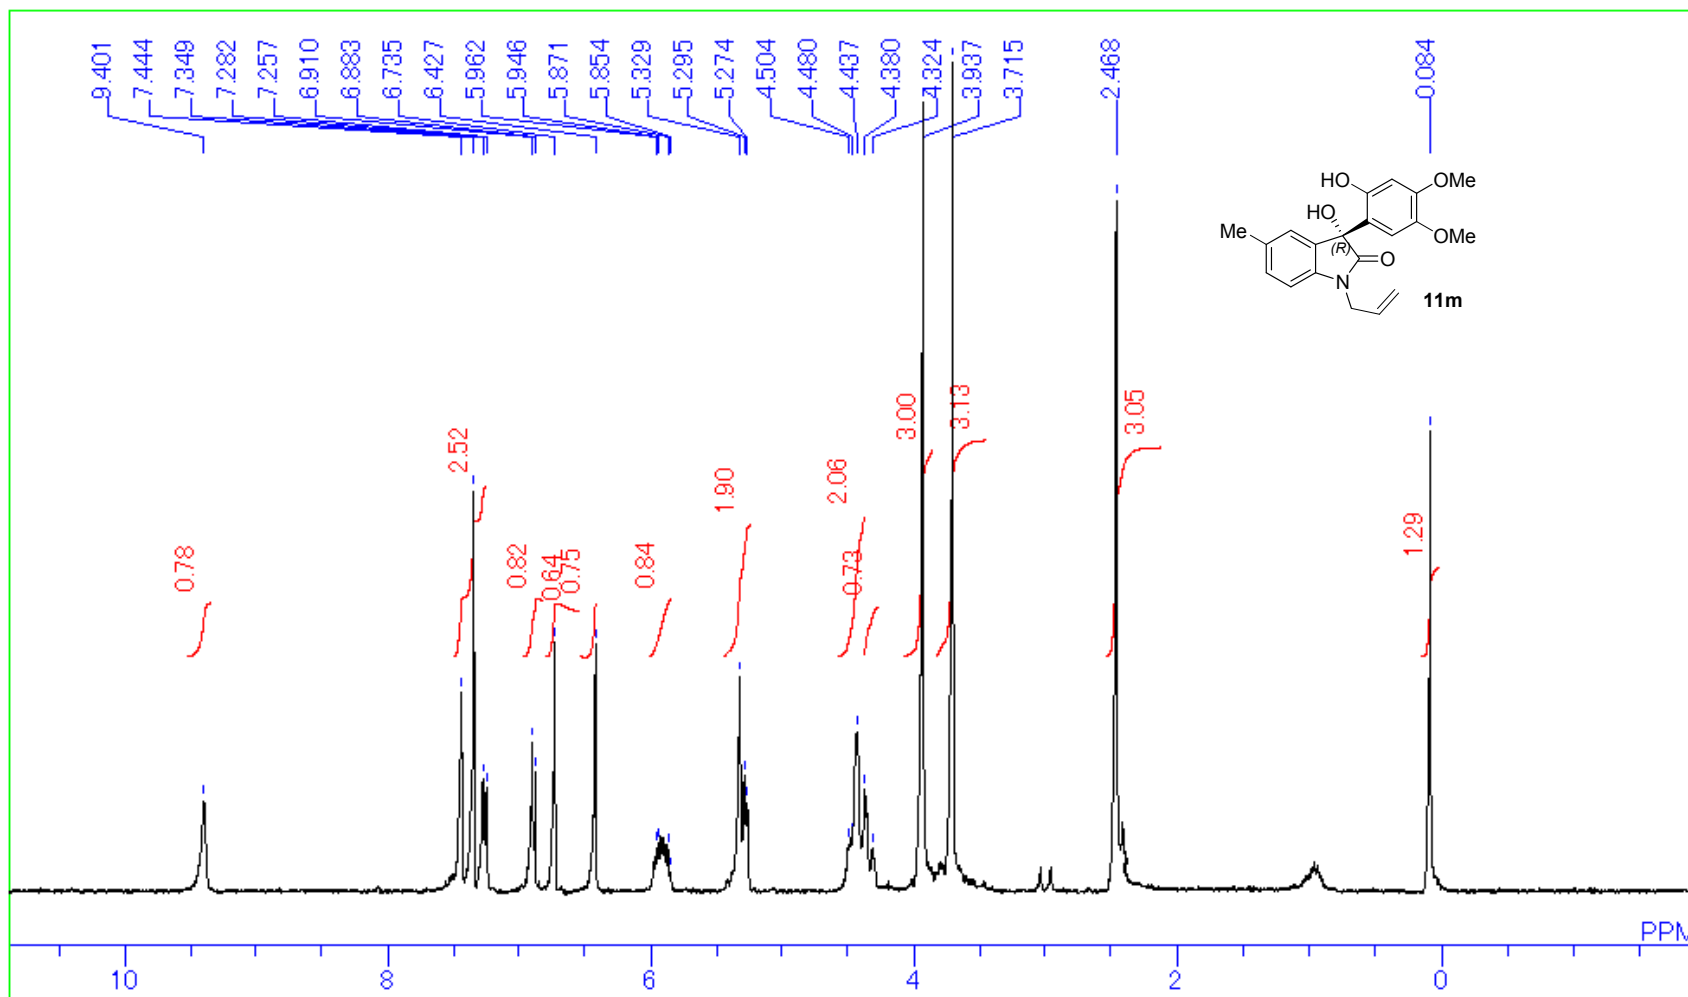

JAS-231

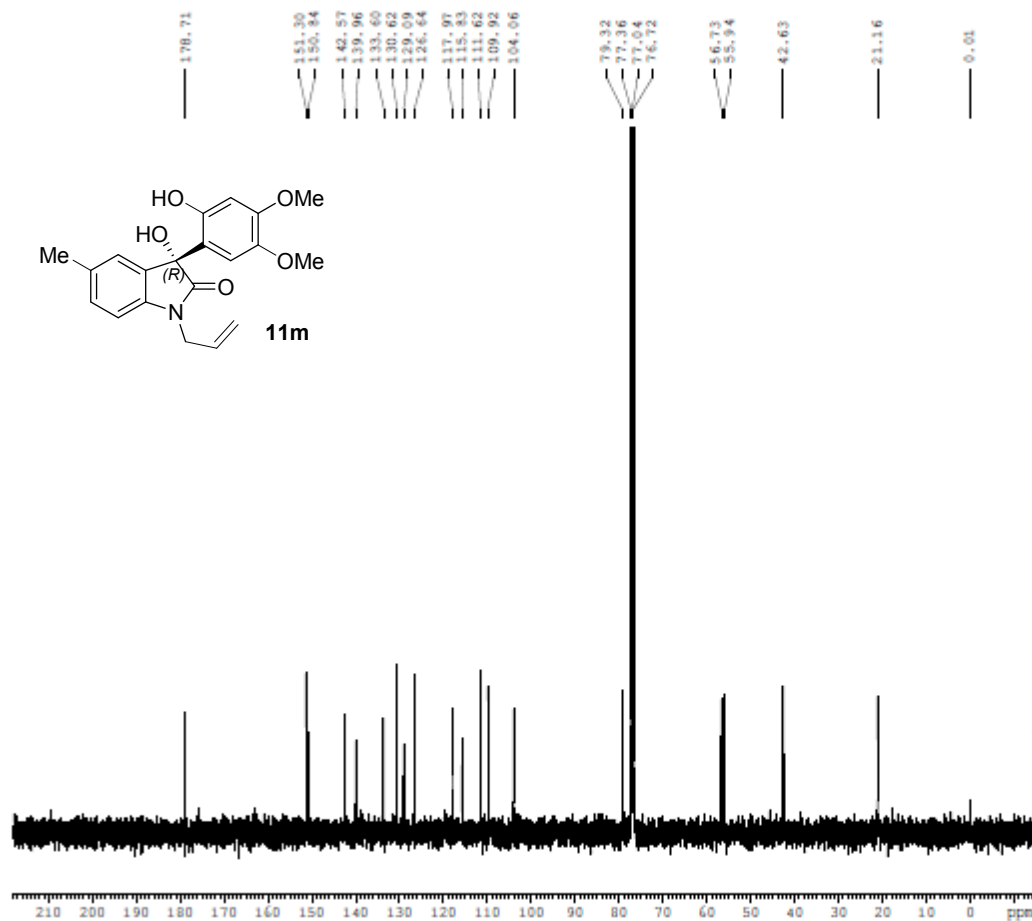

BRUKER  
AVANCE II 400 NMR  
Spectrometer  
SAIF  
Panjab University  
Chandigarh

Current Data Parameters  
NAME Jan24-2014-Administrator  
EXPNO 150  
PROCNO 1

F2 - Acquisition Parameters  
Date\_ 20140125  
Time 2.15  
INSTRUM spect  
PROBHD 5 mm PABBO BB-  
PULPROG zgpg30  
TD 65536  
SOLVENT CDCl3  
NS 512  
DS 4  
SWH 29761.904 Hz  
FIDRES 0.454131 Hz  
AQ 1.1010548 sec  
RG 645  
DM 16.800 usec  
DE 6.00 usec  
TE 295.0 K  
D1 2.00000000 sec  
d11 0.03000000 sec  
DELTA 1.89999998 sec  
TD0 1

----- CHANNEL F1 -----  
NUC1 13c  
P1 9.60 usec  
PL1 -2.00 dB  
SFO1 100.6228298 MHz

----- CHANNEL F2 -----  
CPDPRG2 waltz16  
NUC2 1H  
PCPD2 80.00 usec  
PL2 -3.00 dB  
PL12 14.31 dB  
PL13 18.00 dB  
SFO2 400.1316005 MHz

F2 - Processing parameters  
SI 32768  
SF 100.6127690 MHz  
WDW EM  
SSB 0  
LB 1.00 Hz  
GB 0  
PC 1.40

avtar\_saifpu@yahoo.co.in

C:\Users\technologies\Desktop\C

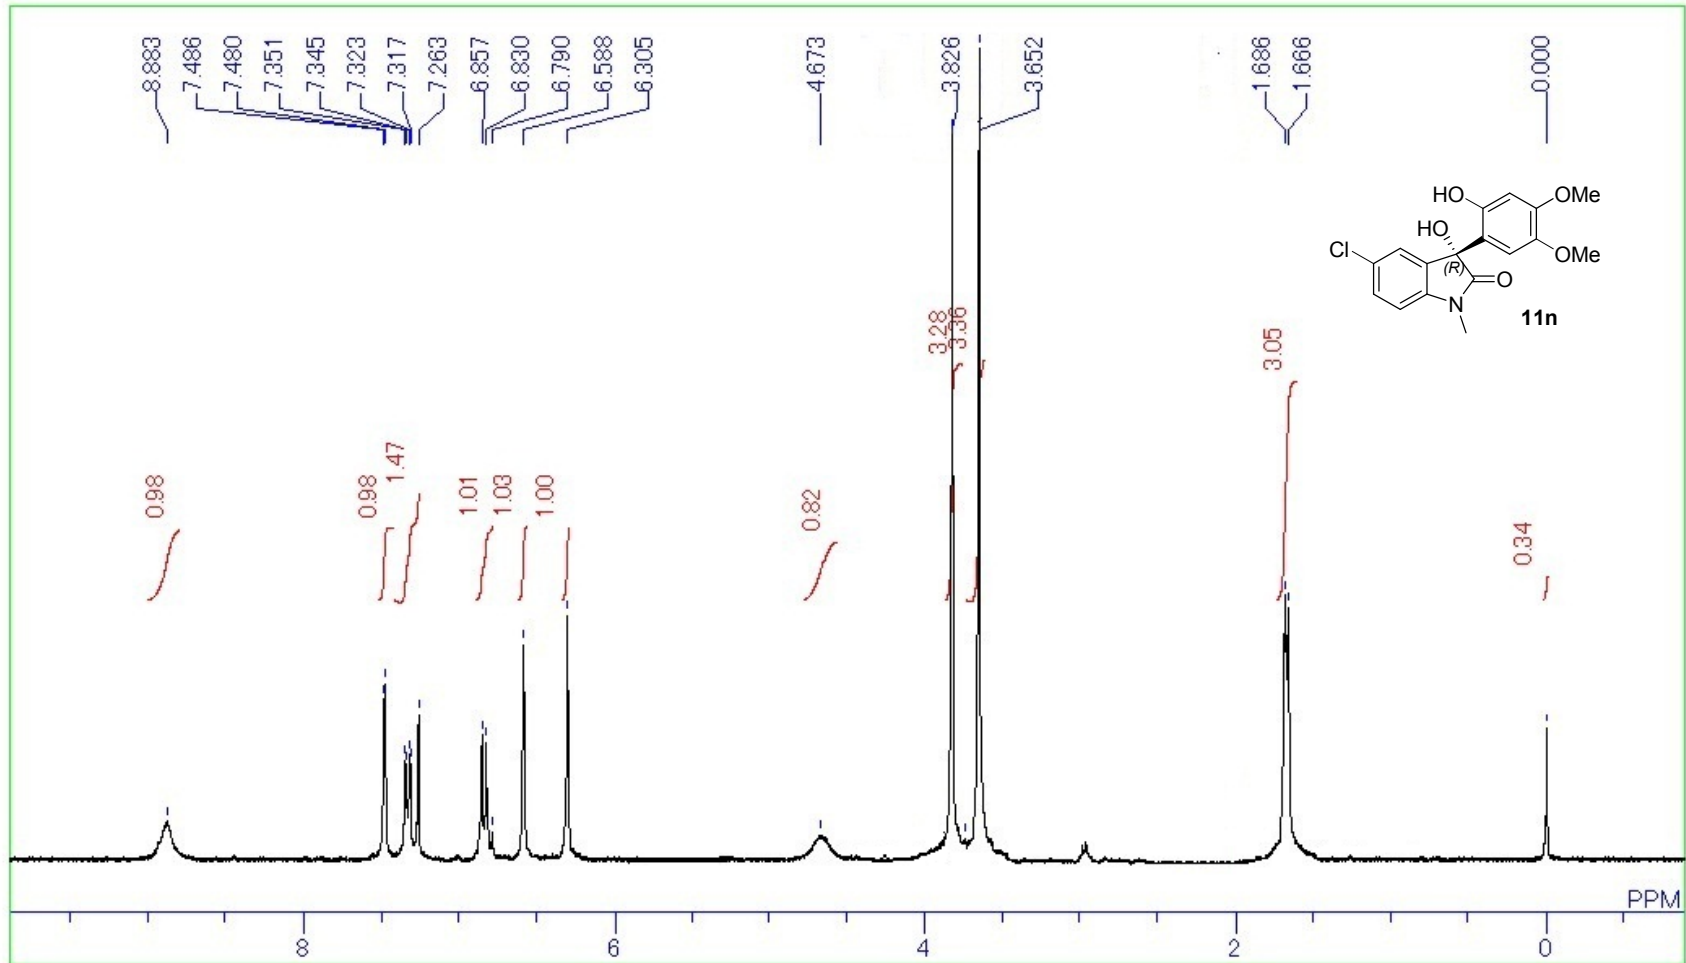



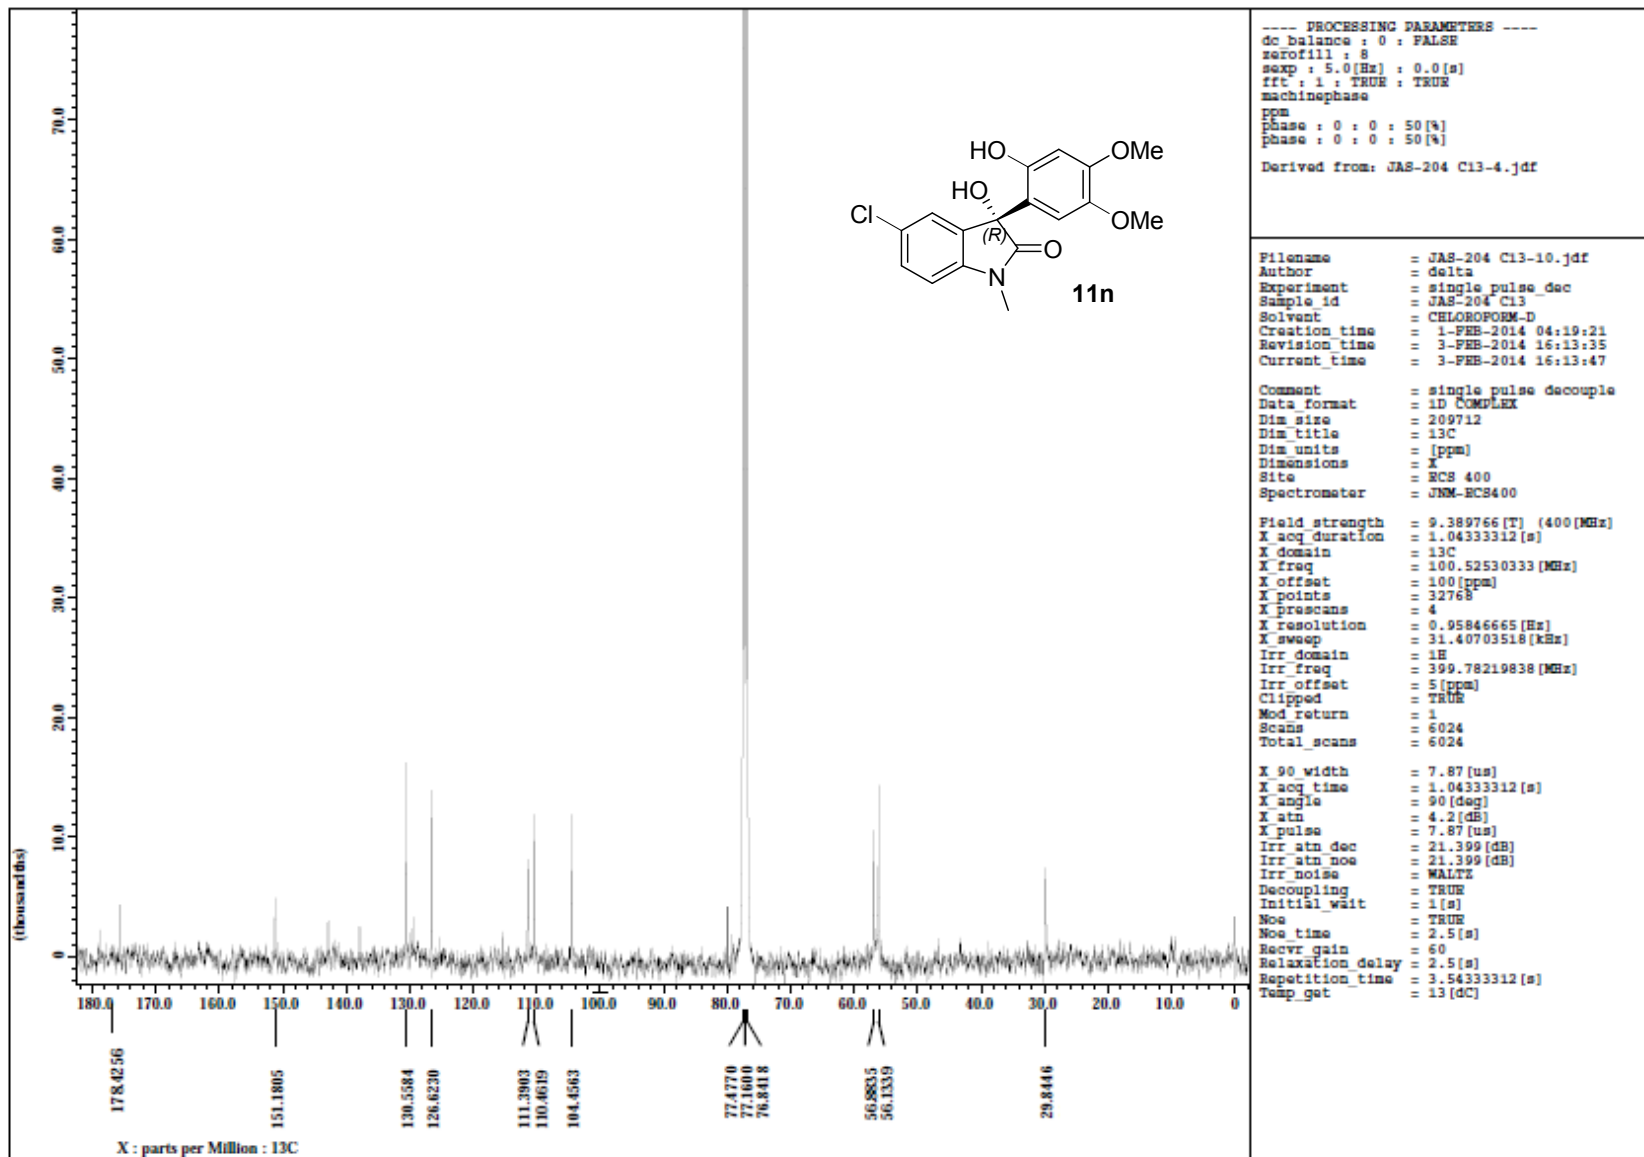

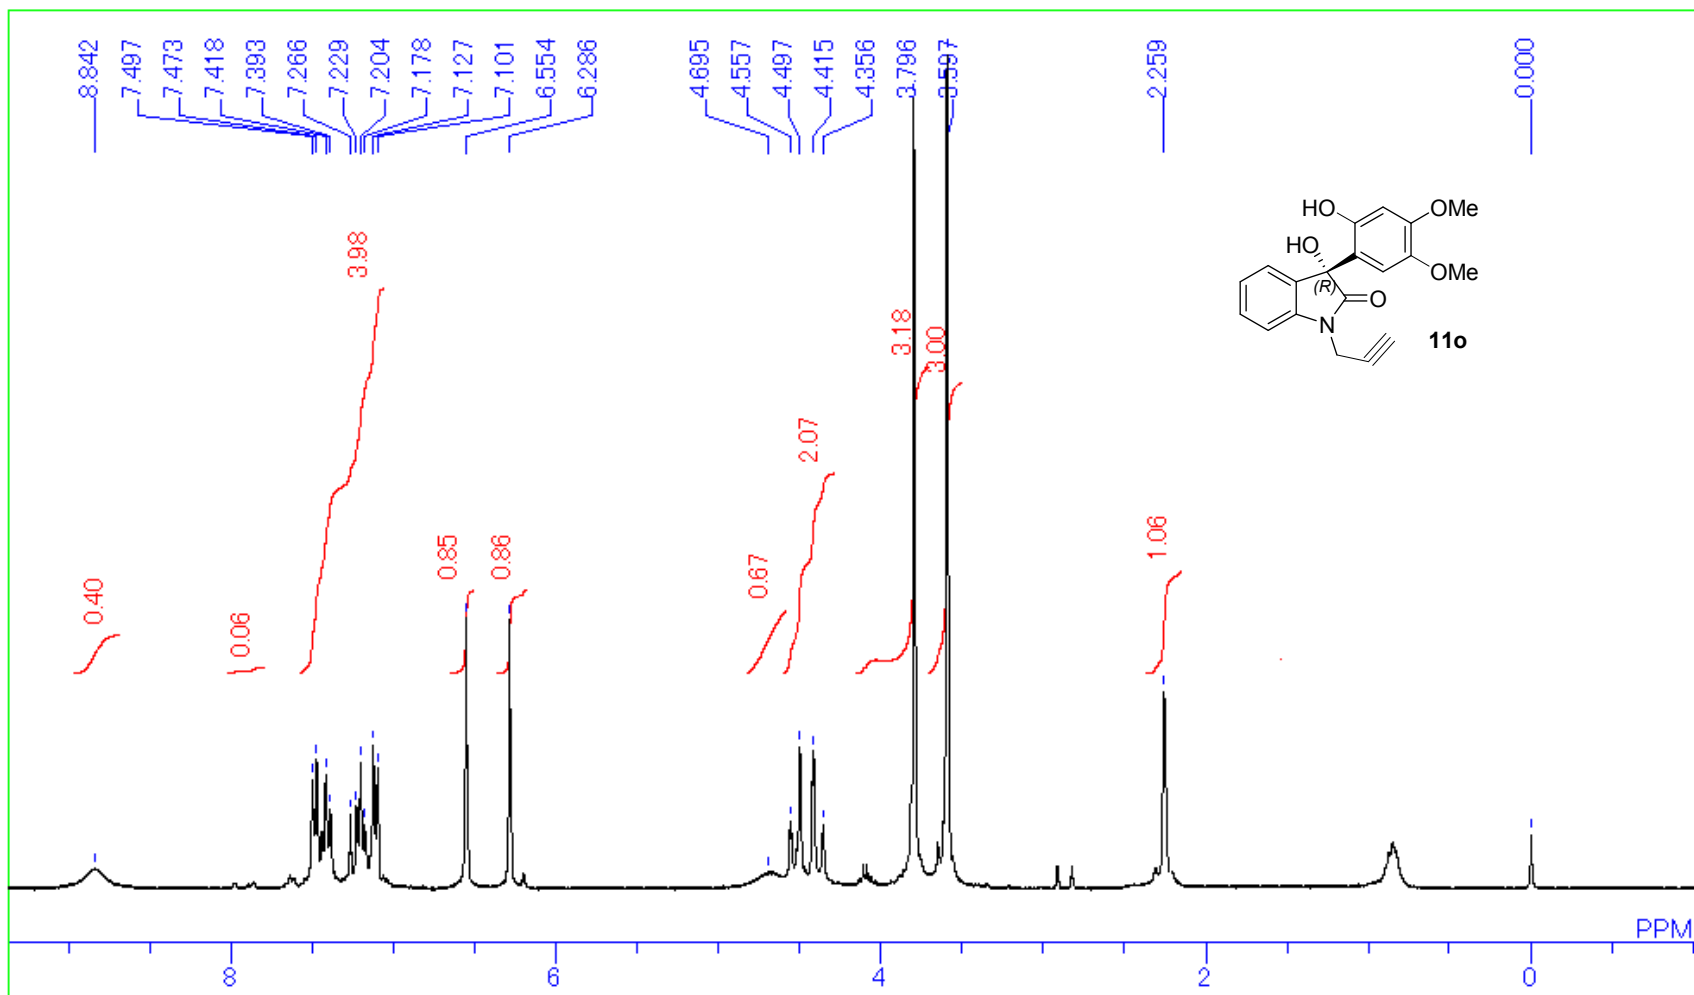

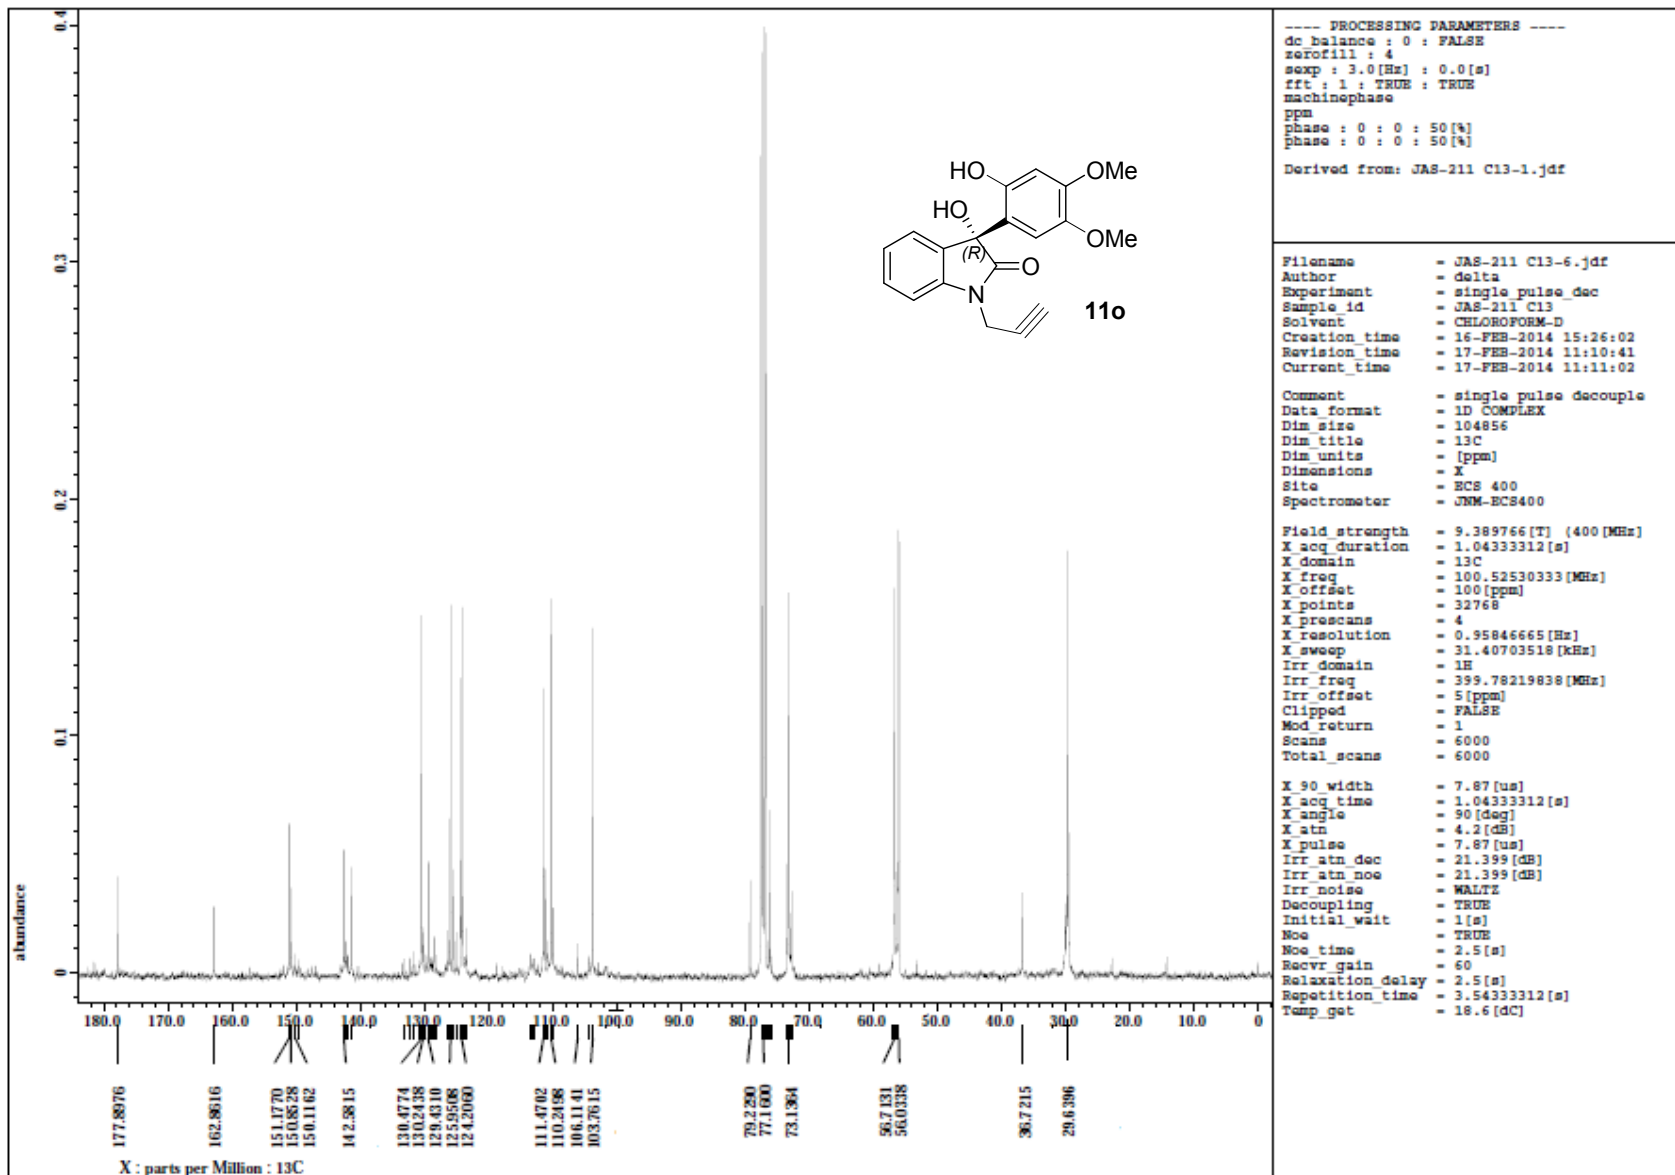

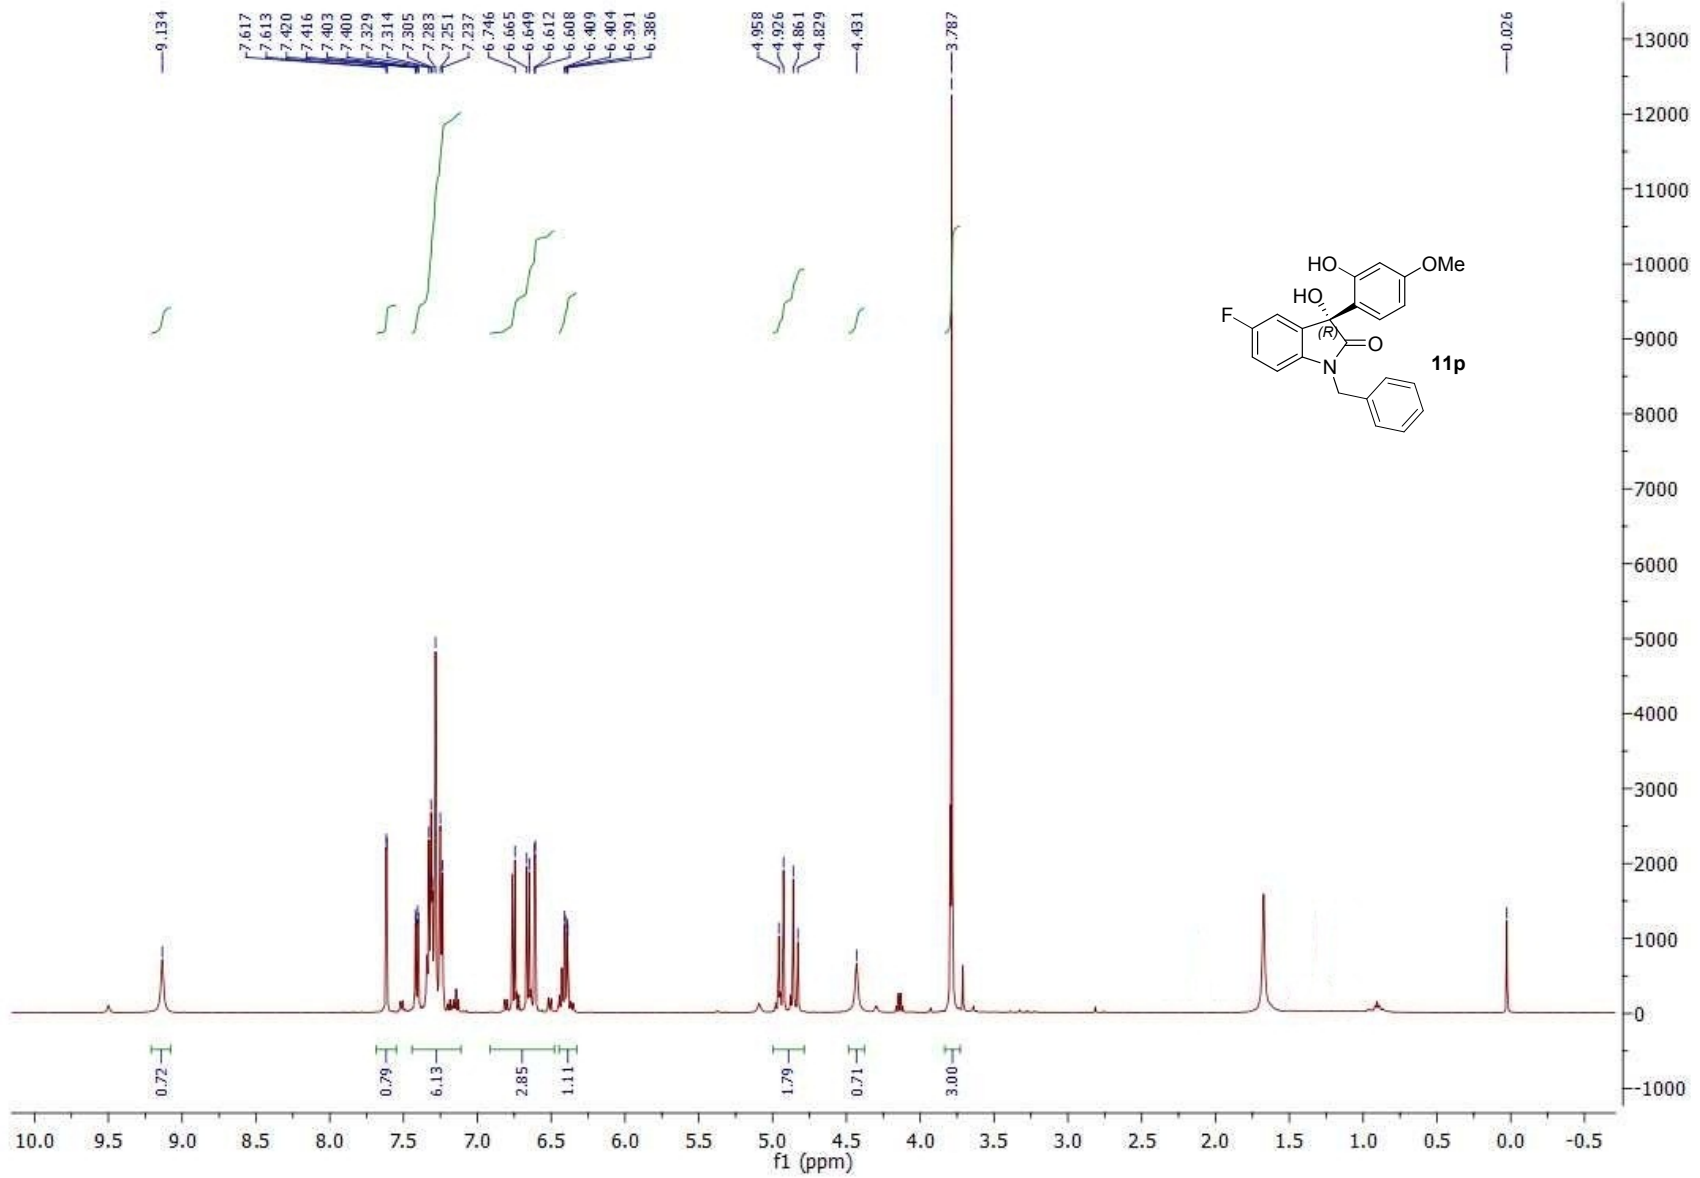

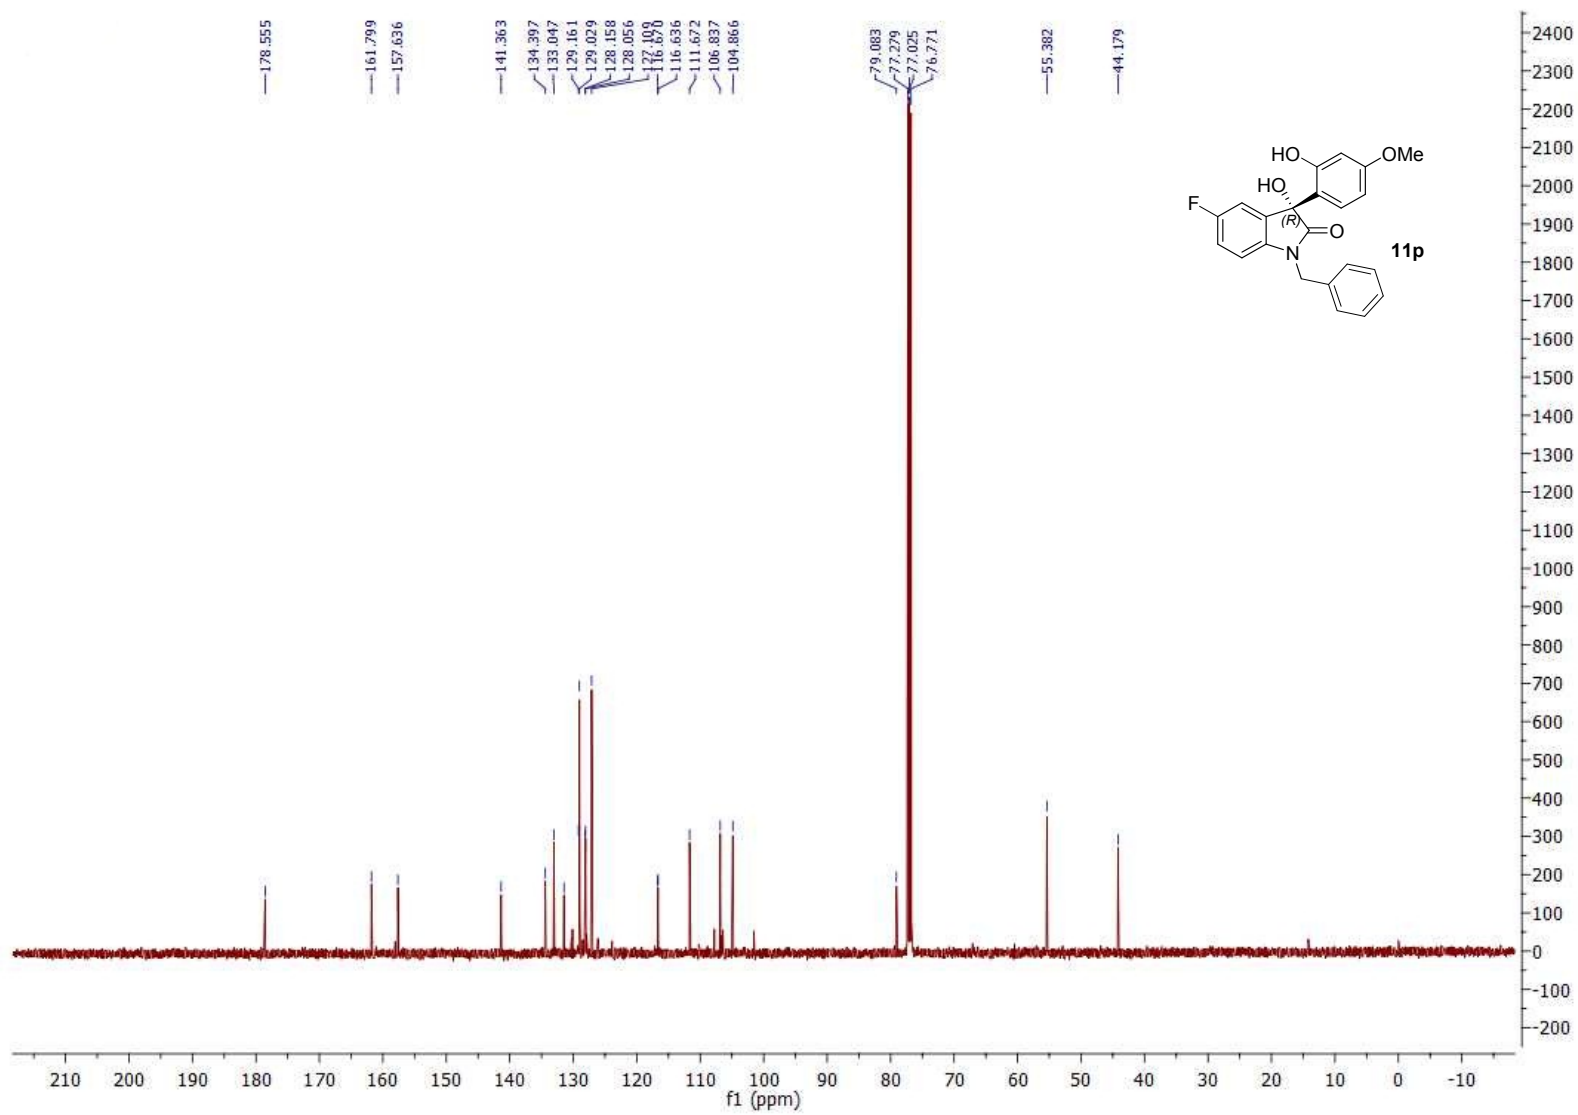

16 sarb may  
SUG-912

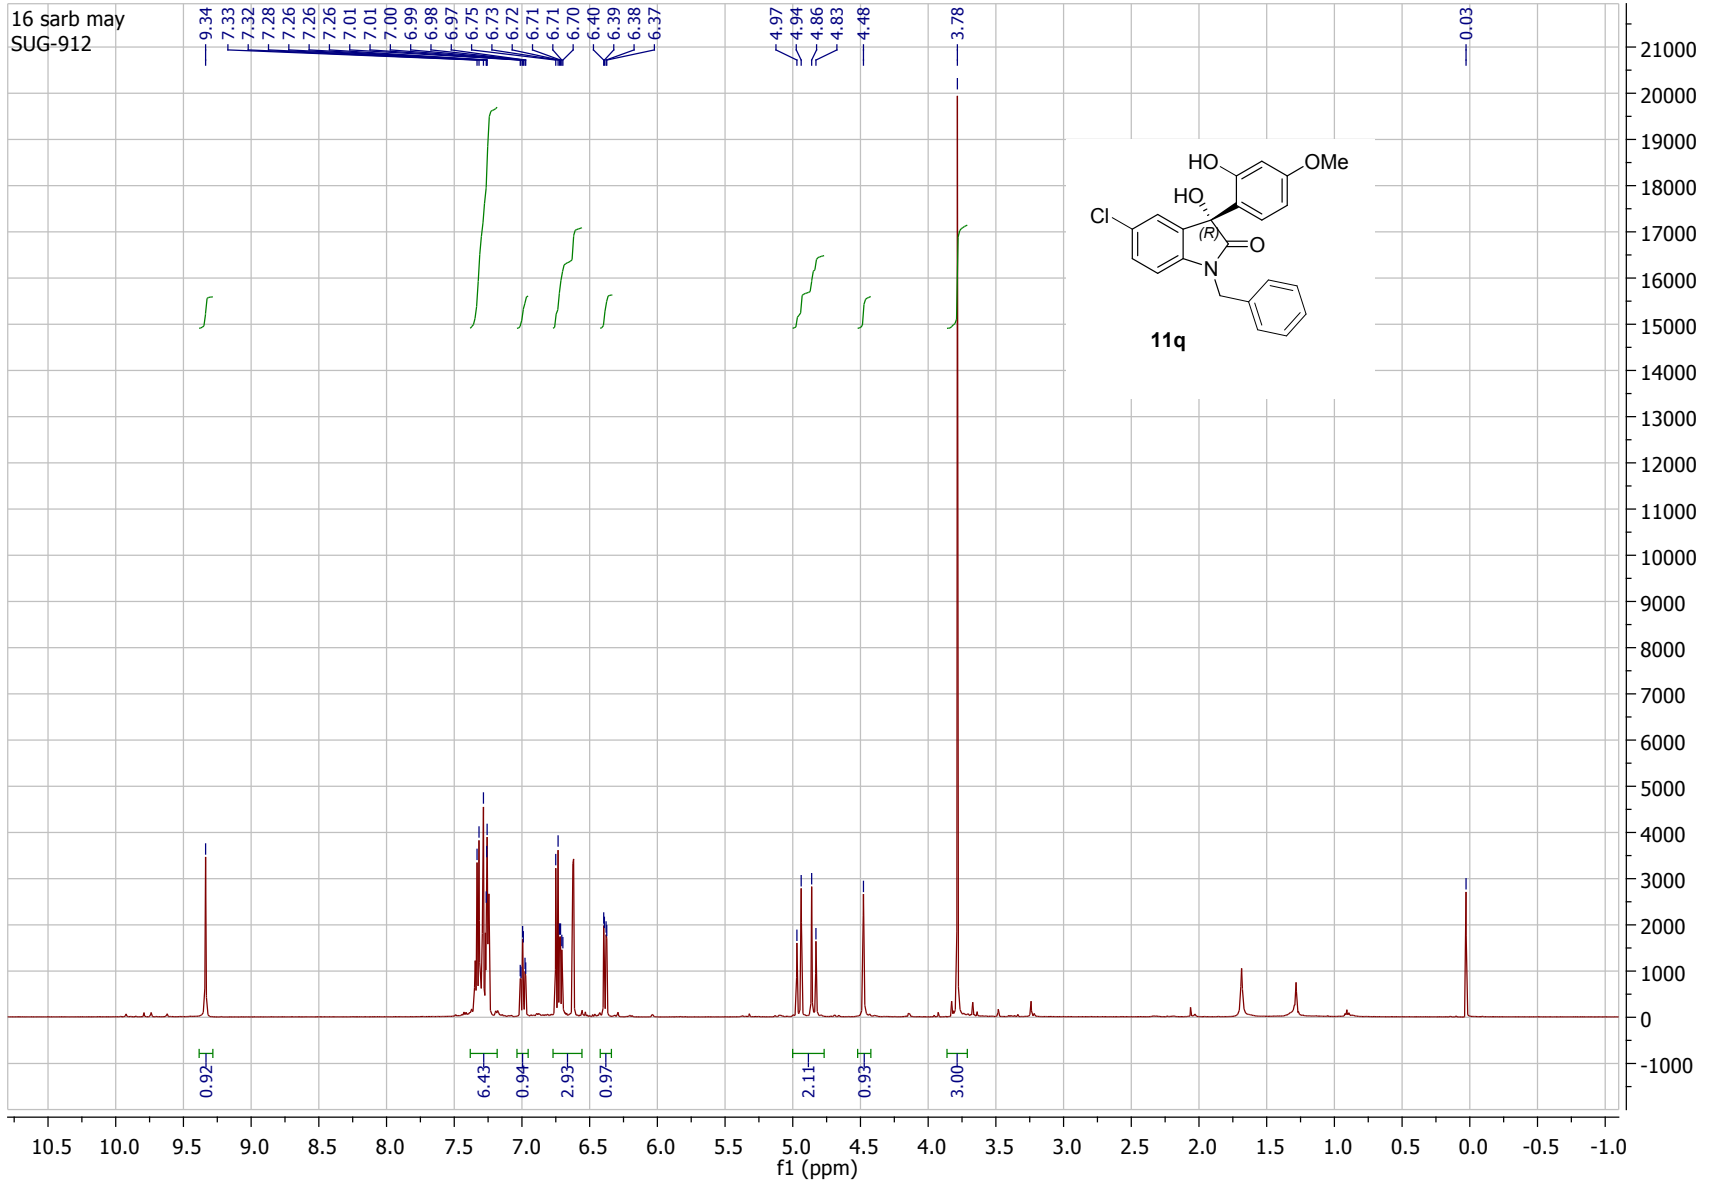

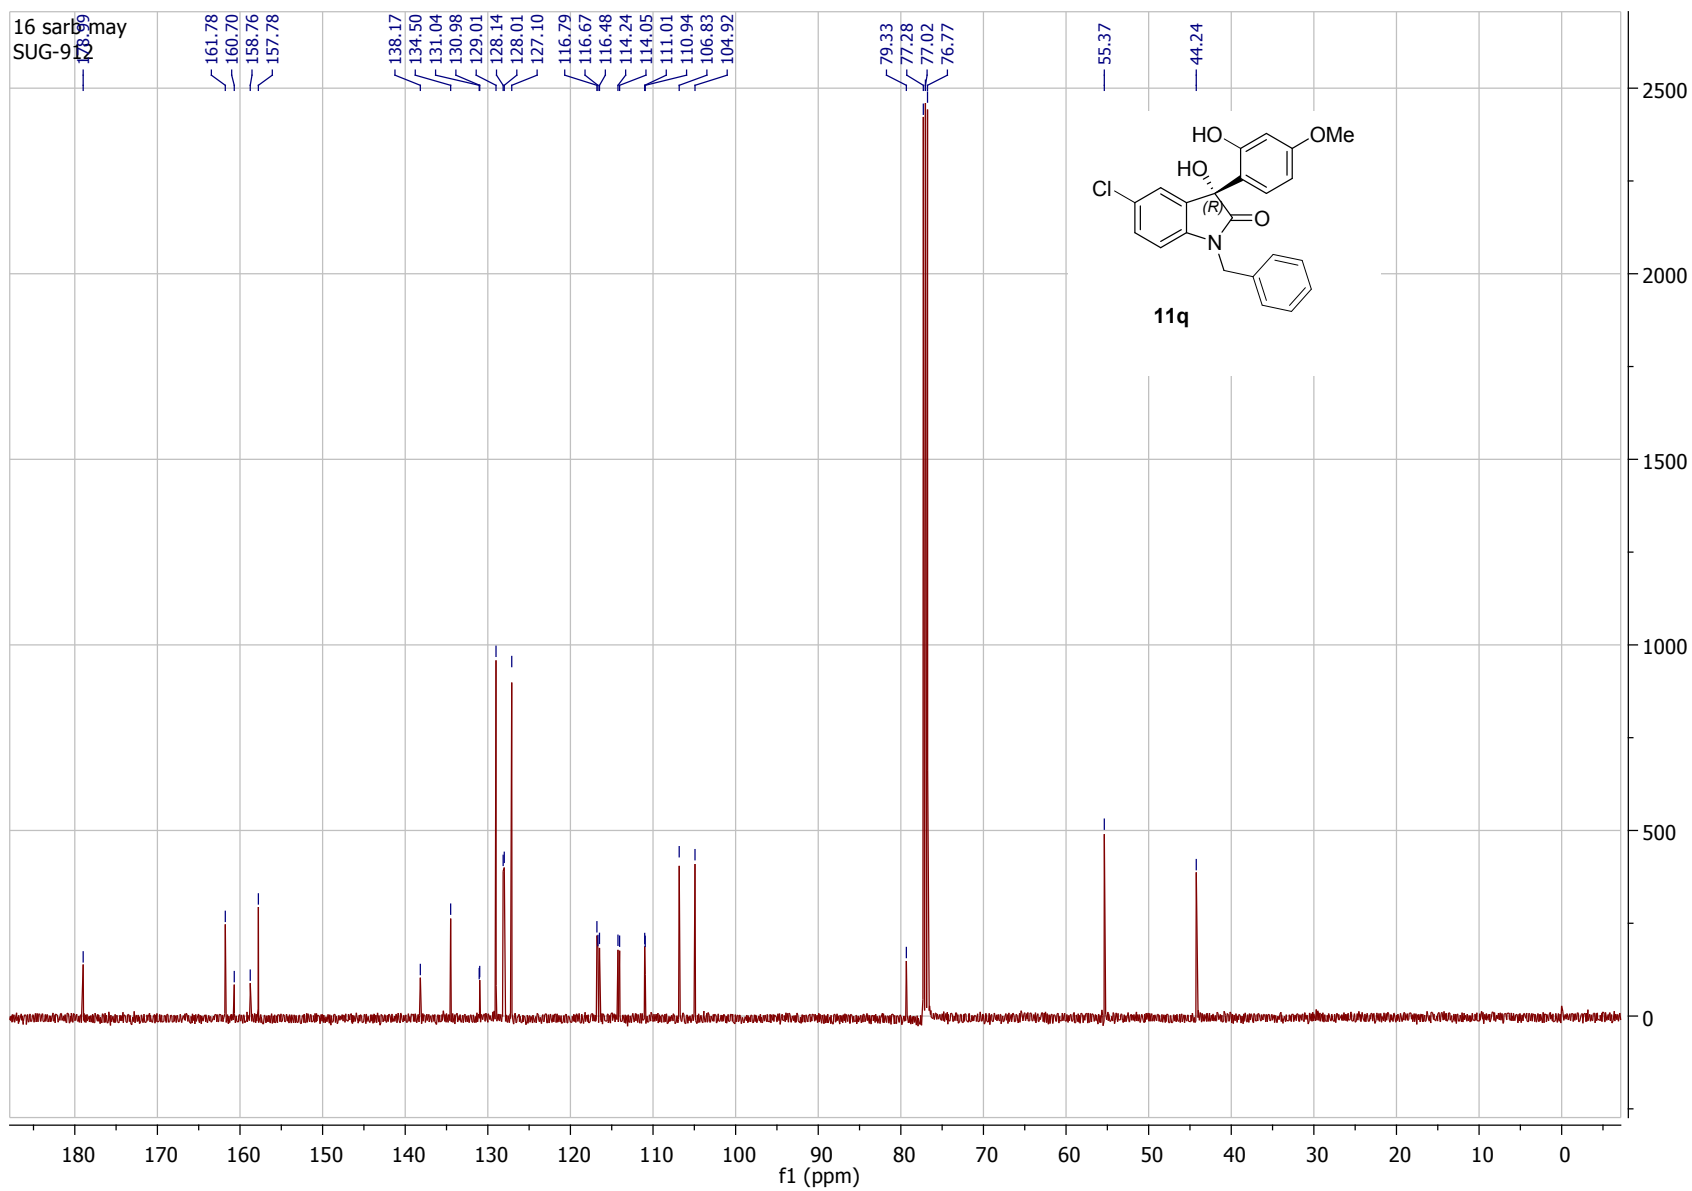

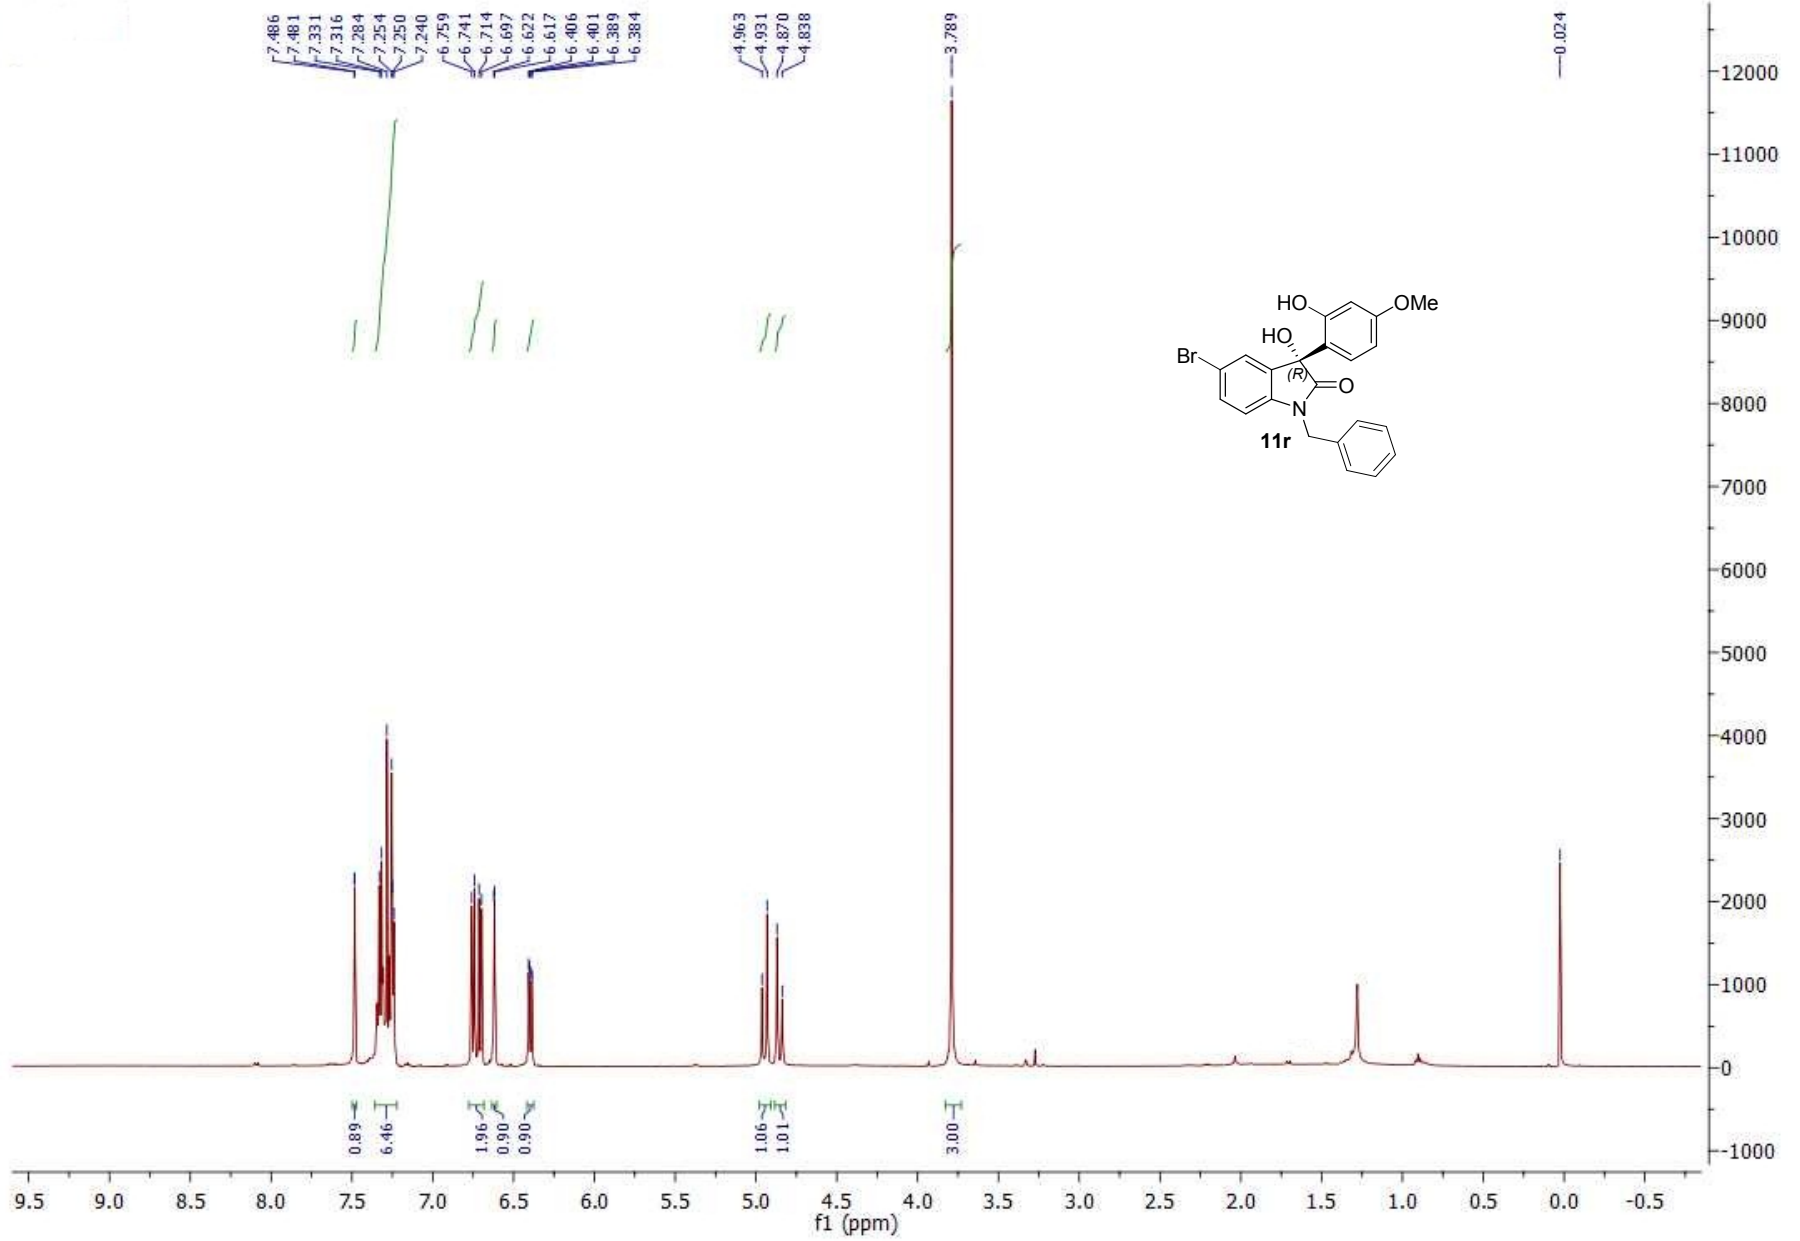



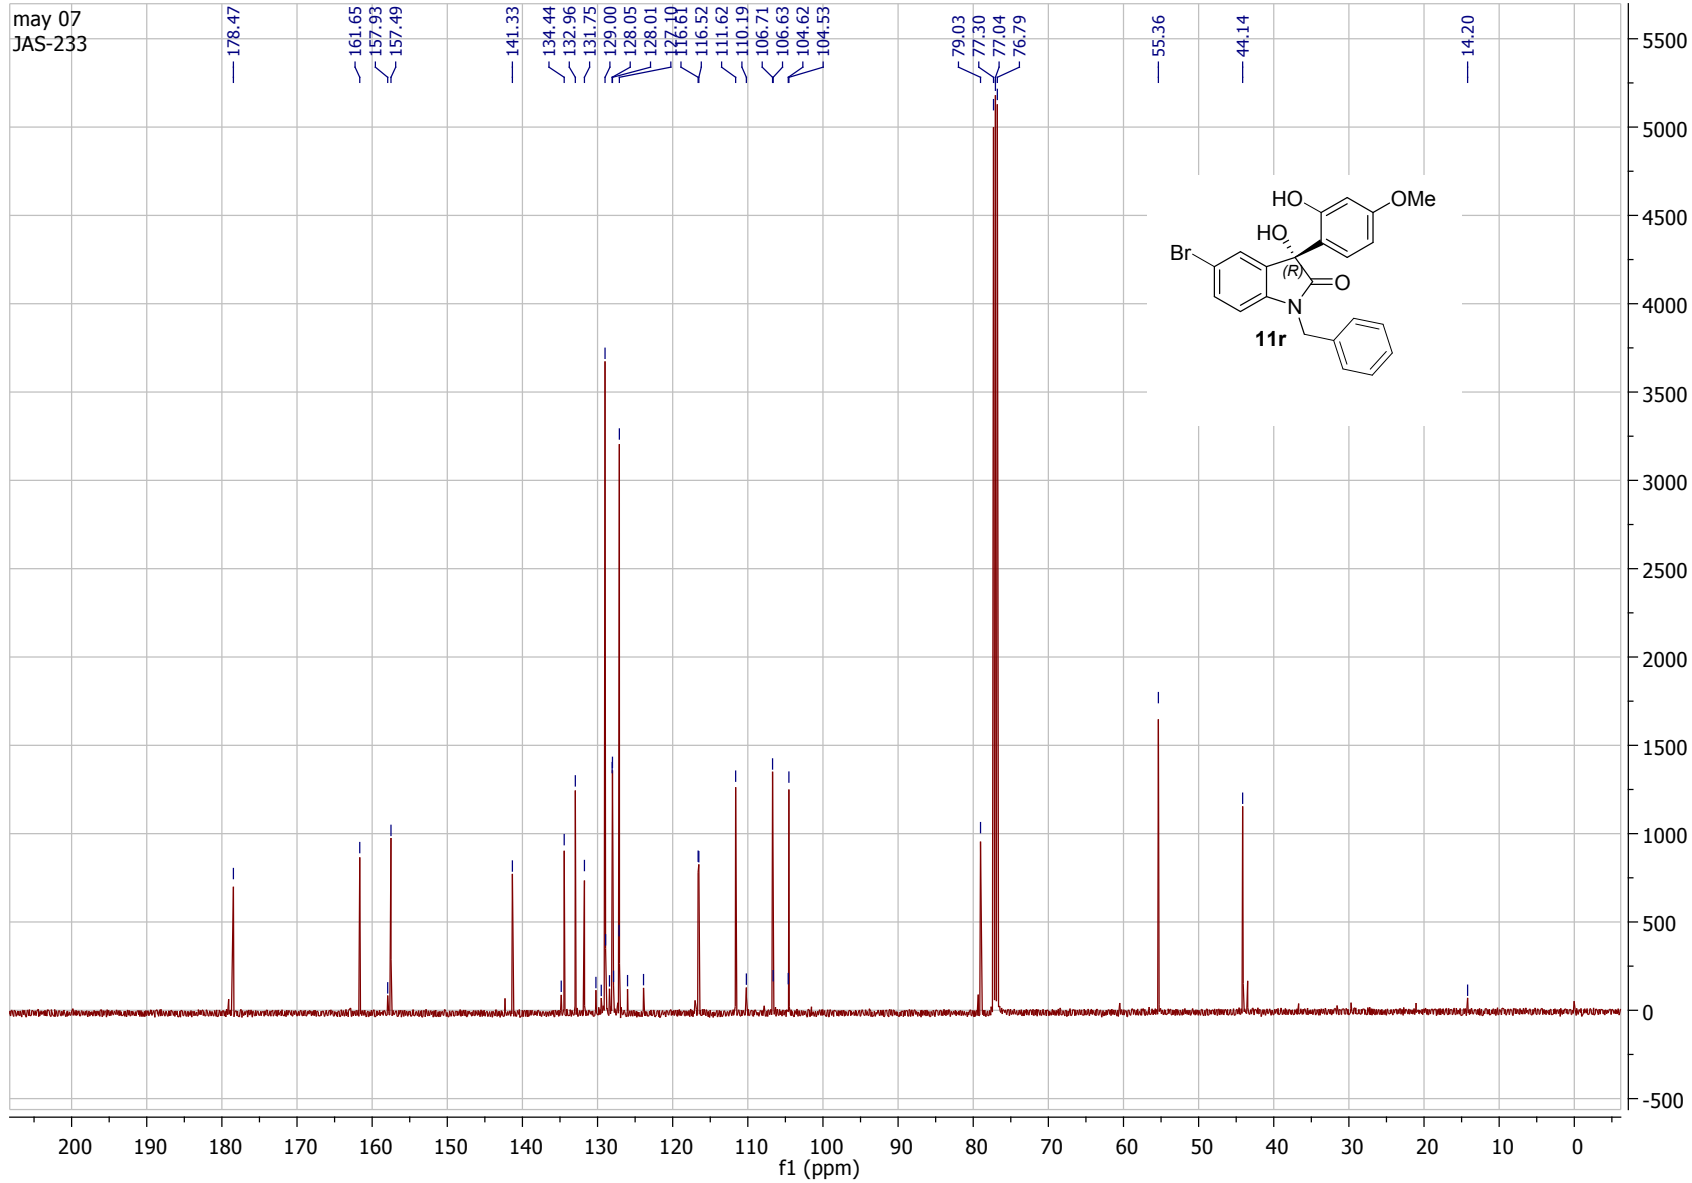

20 oct 2014  
JAS-N3

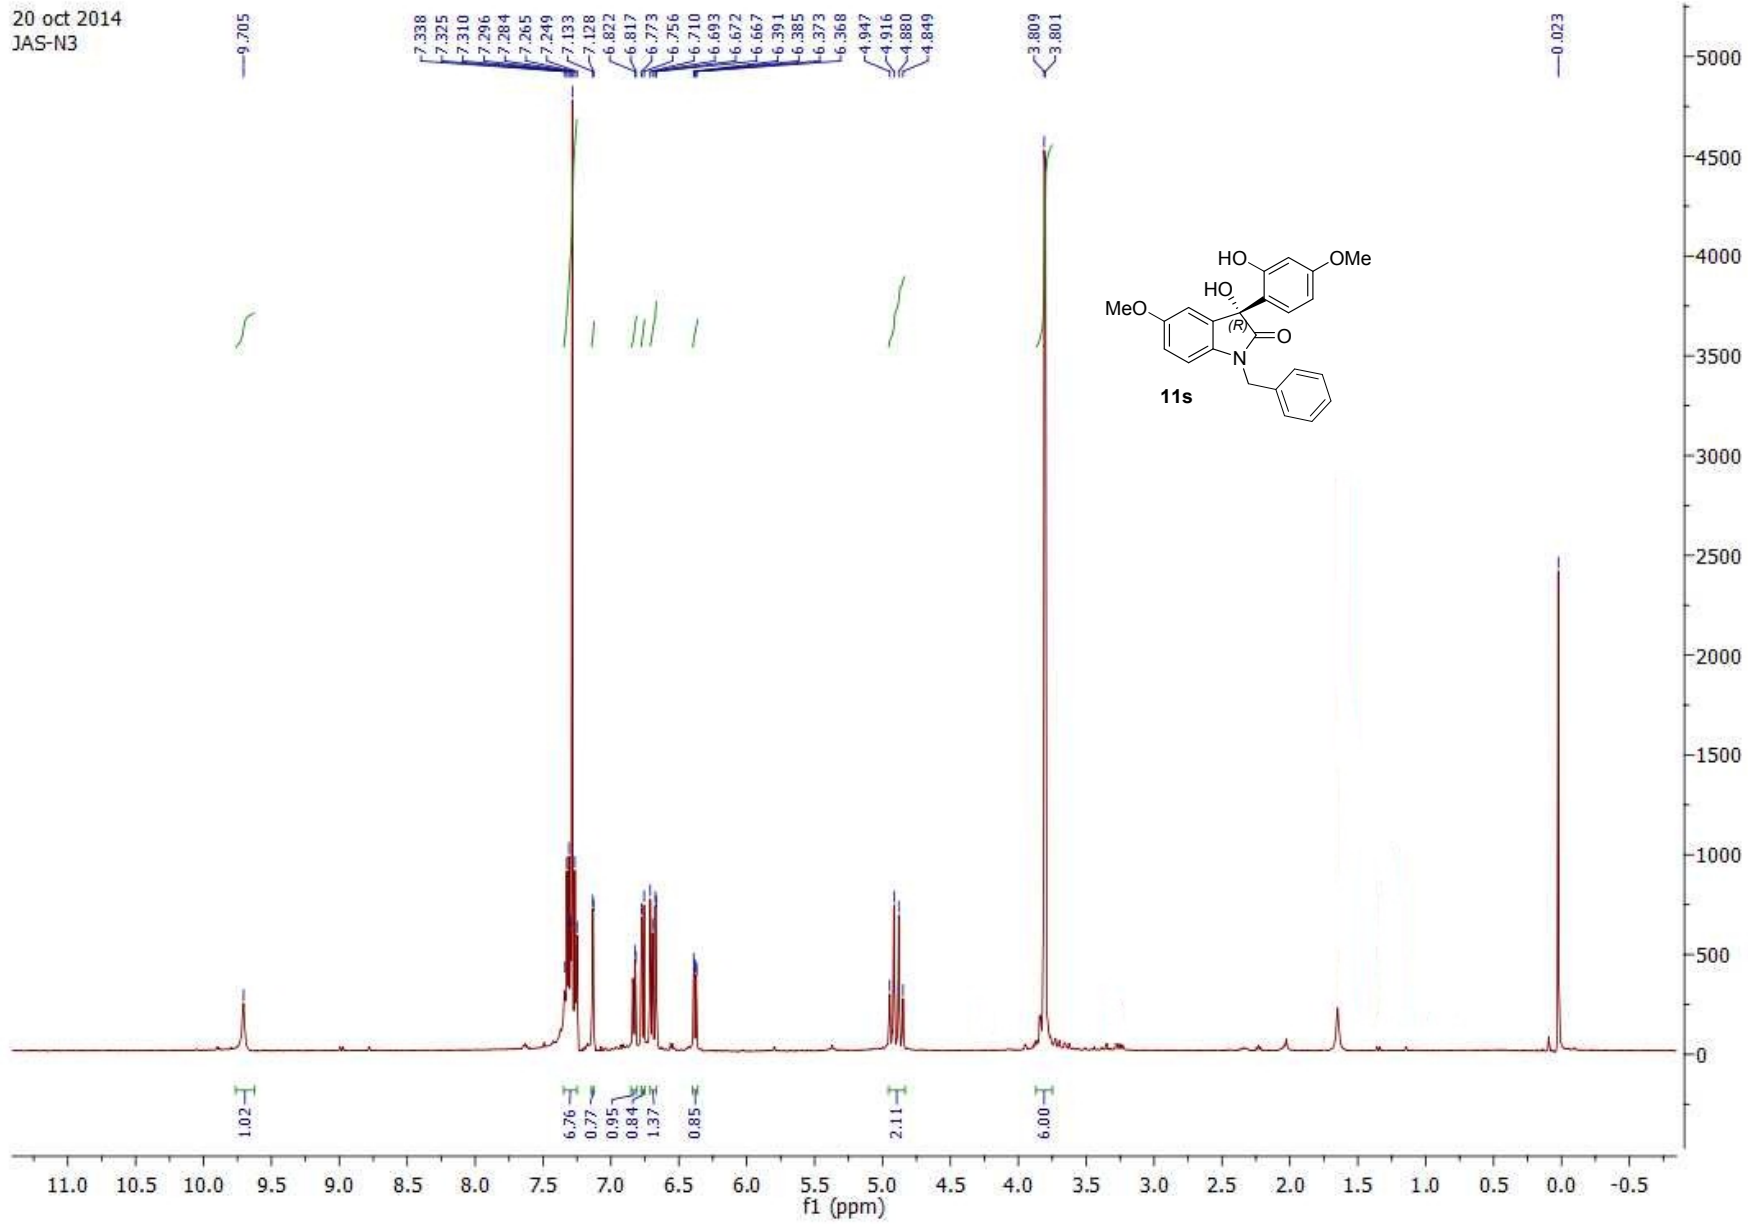

20 oct 2014  
JAS-N3

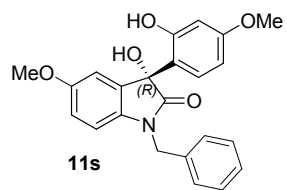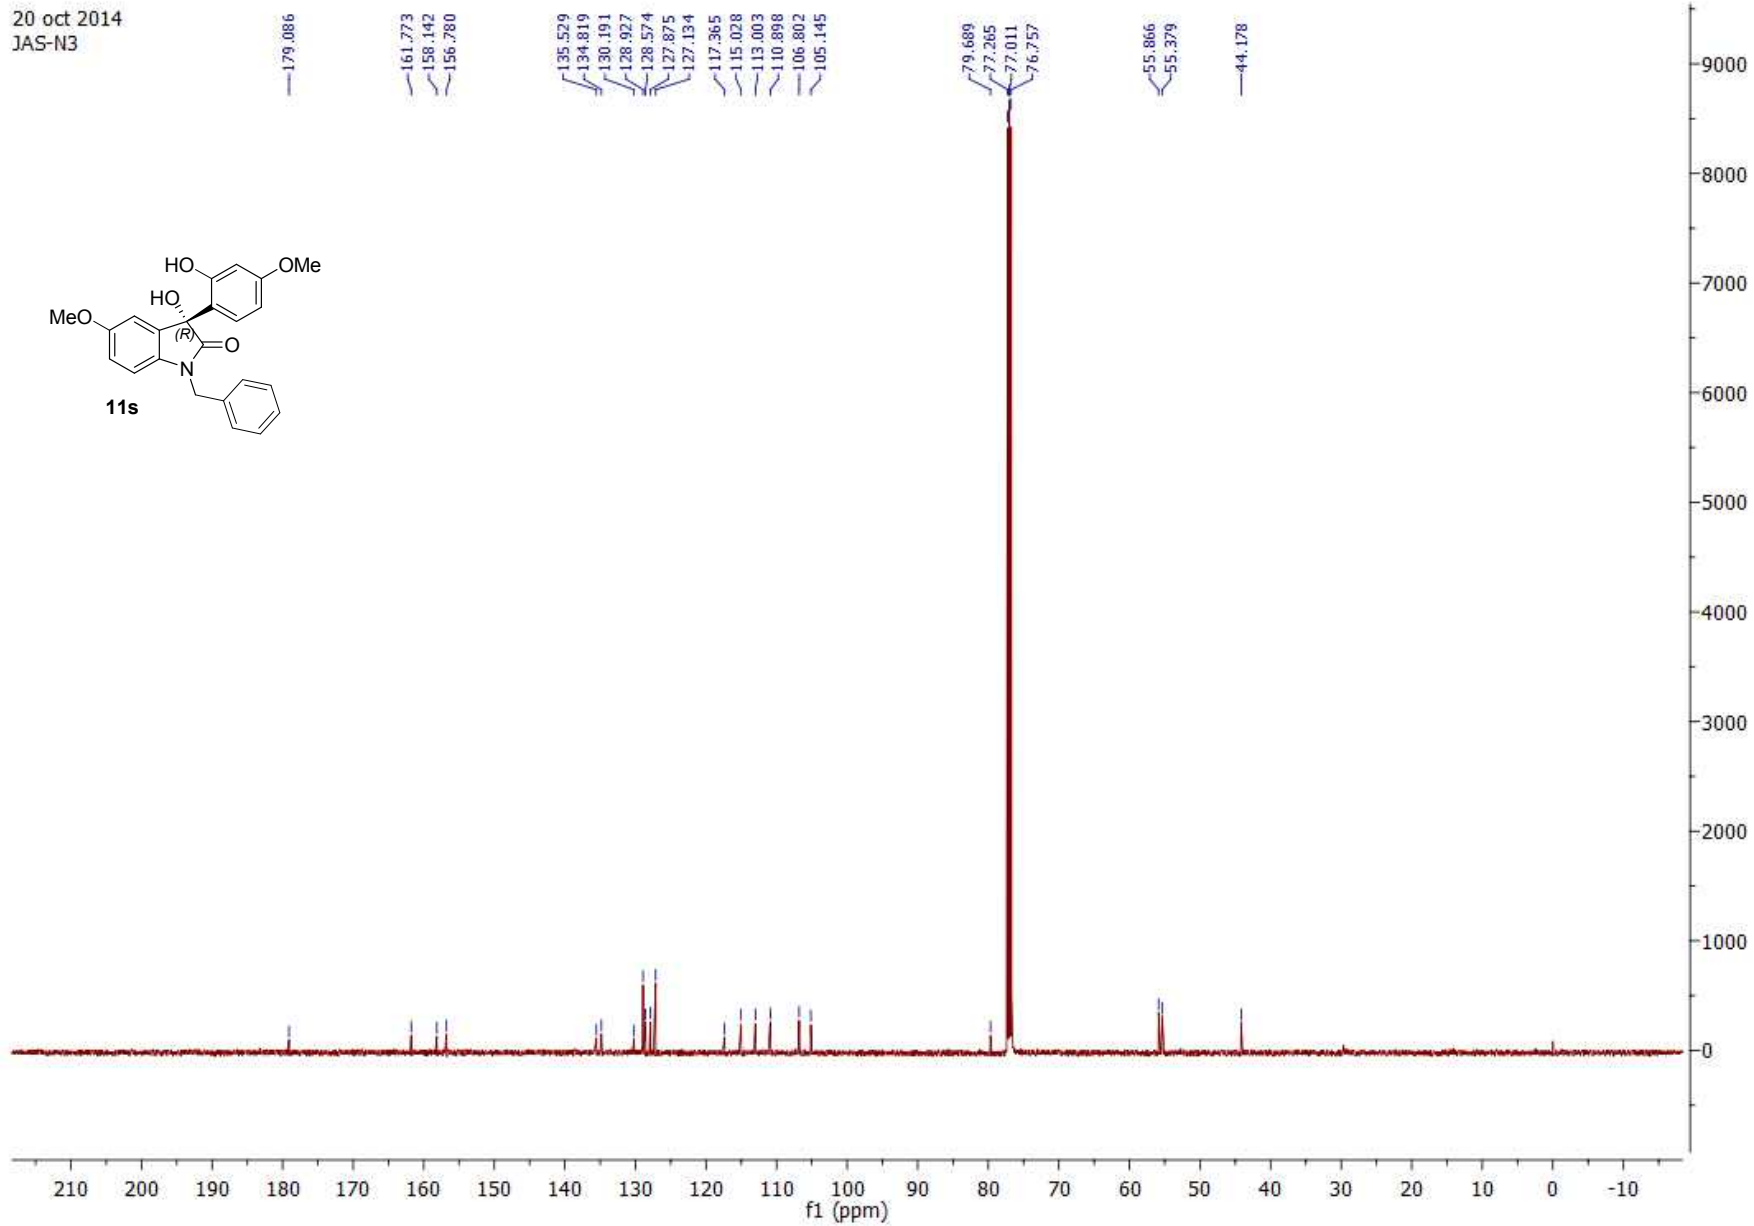

SID 21 oct 2014  
sid-mip

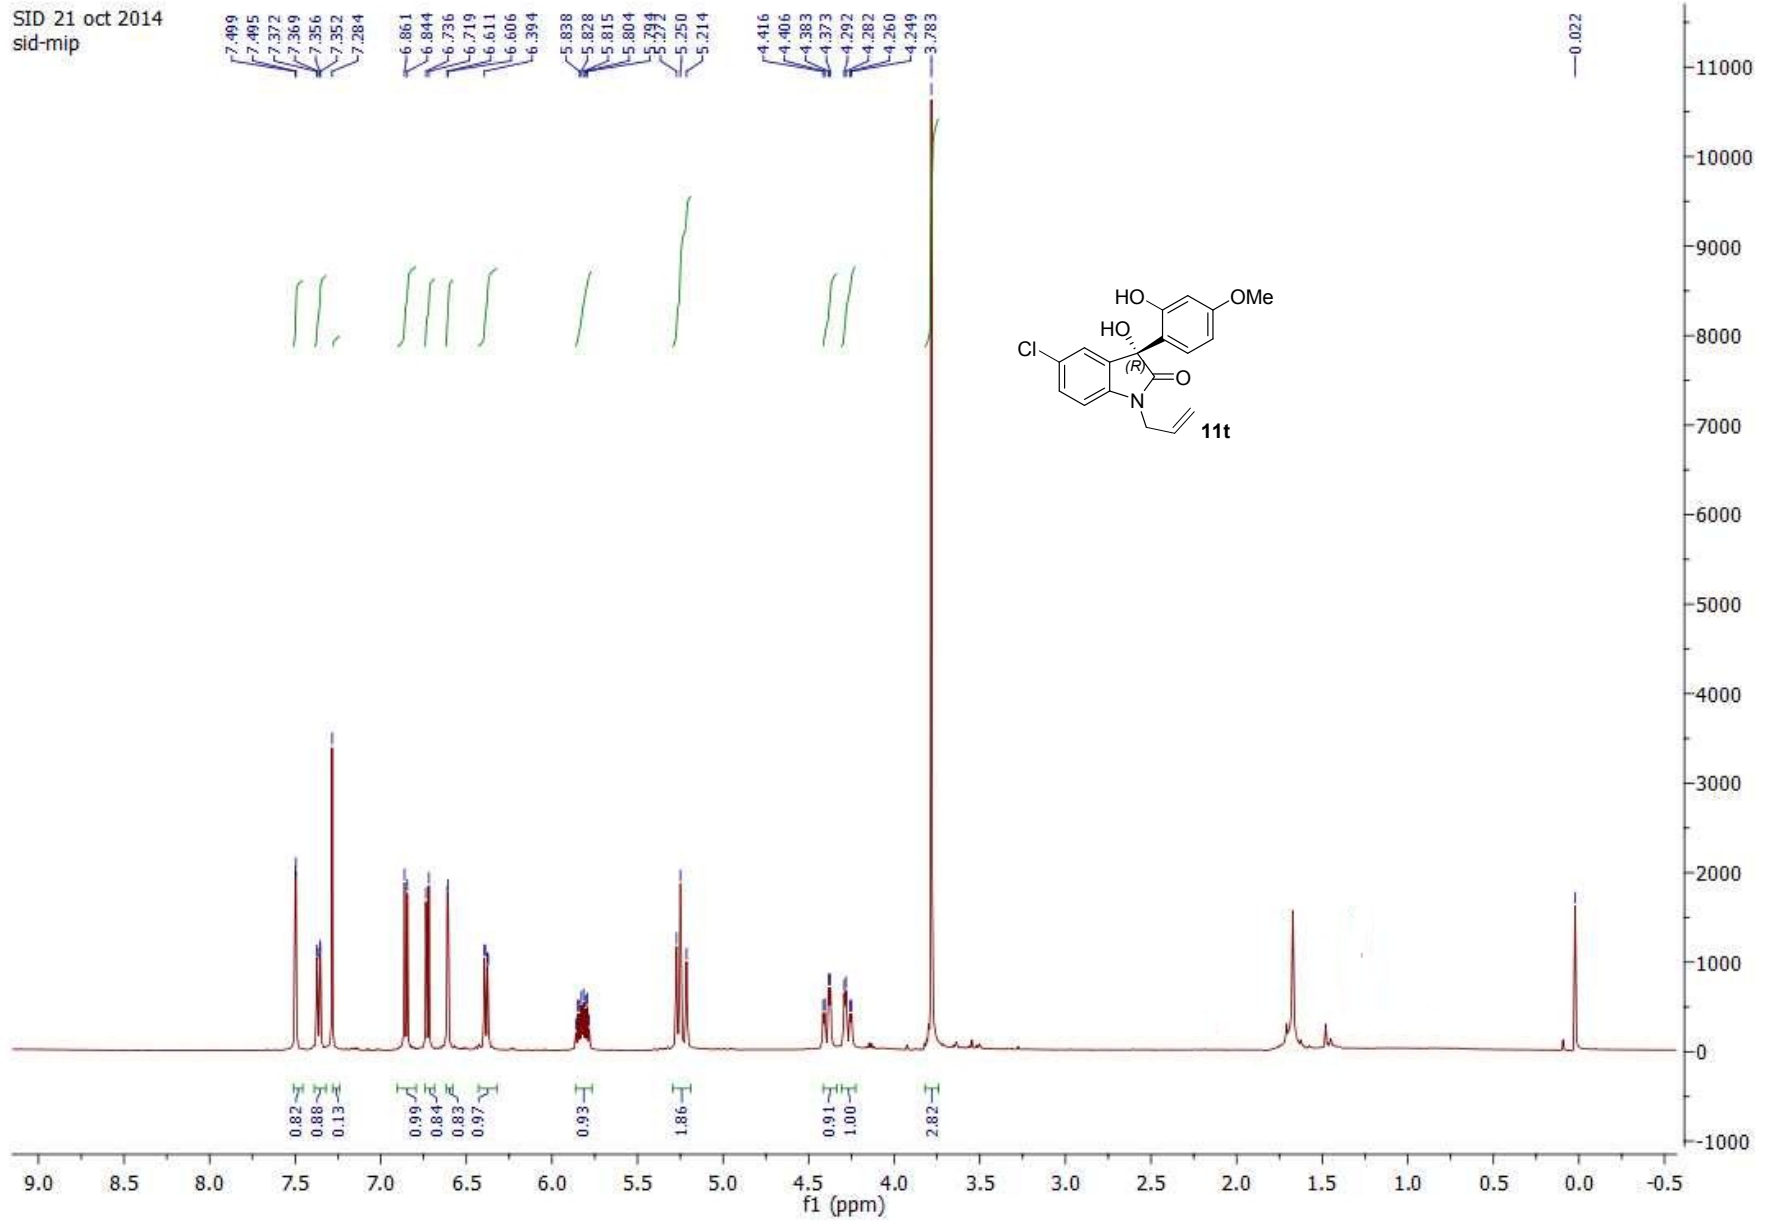

SID 21 oct 2014  
sid-mip

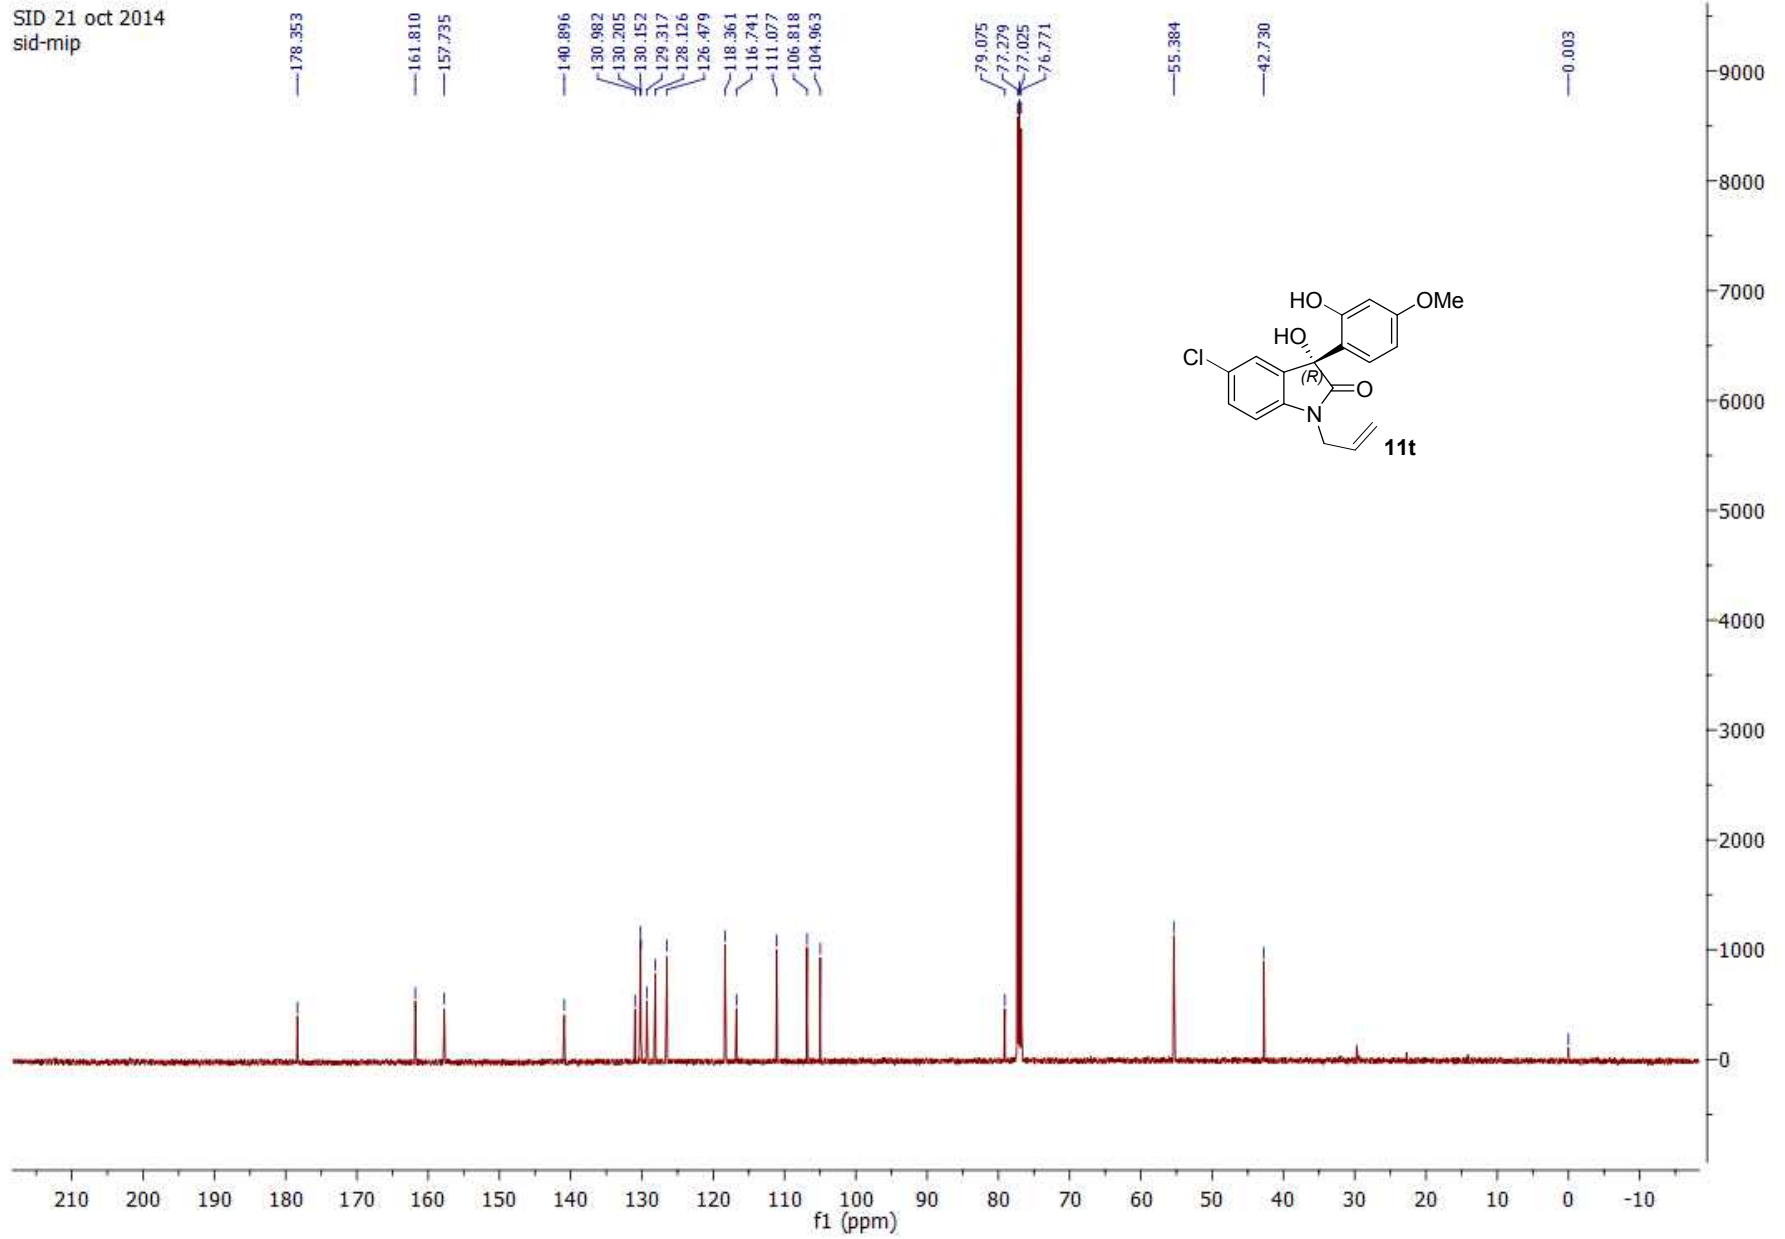

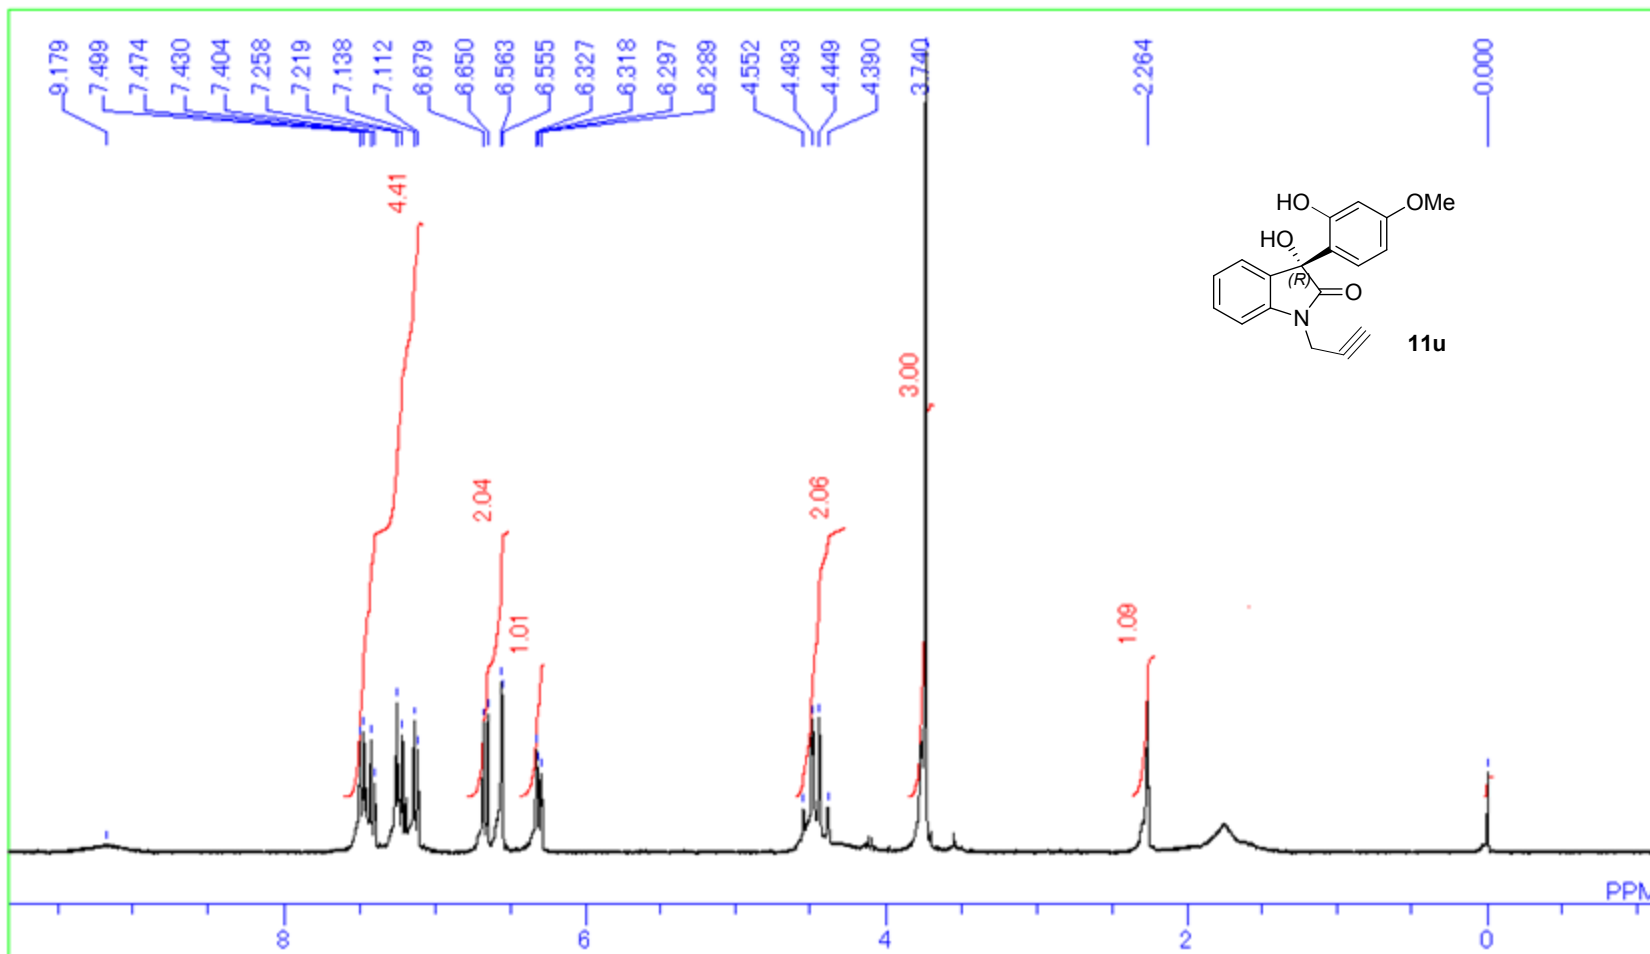

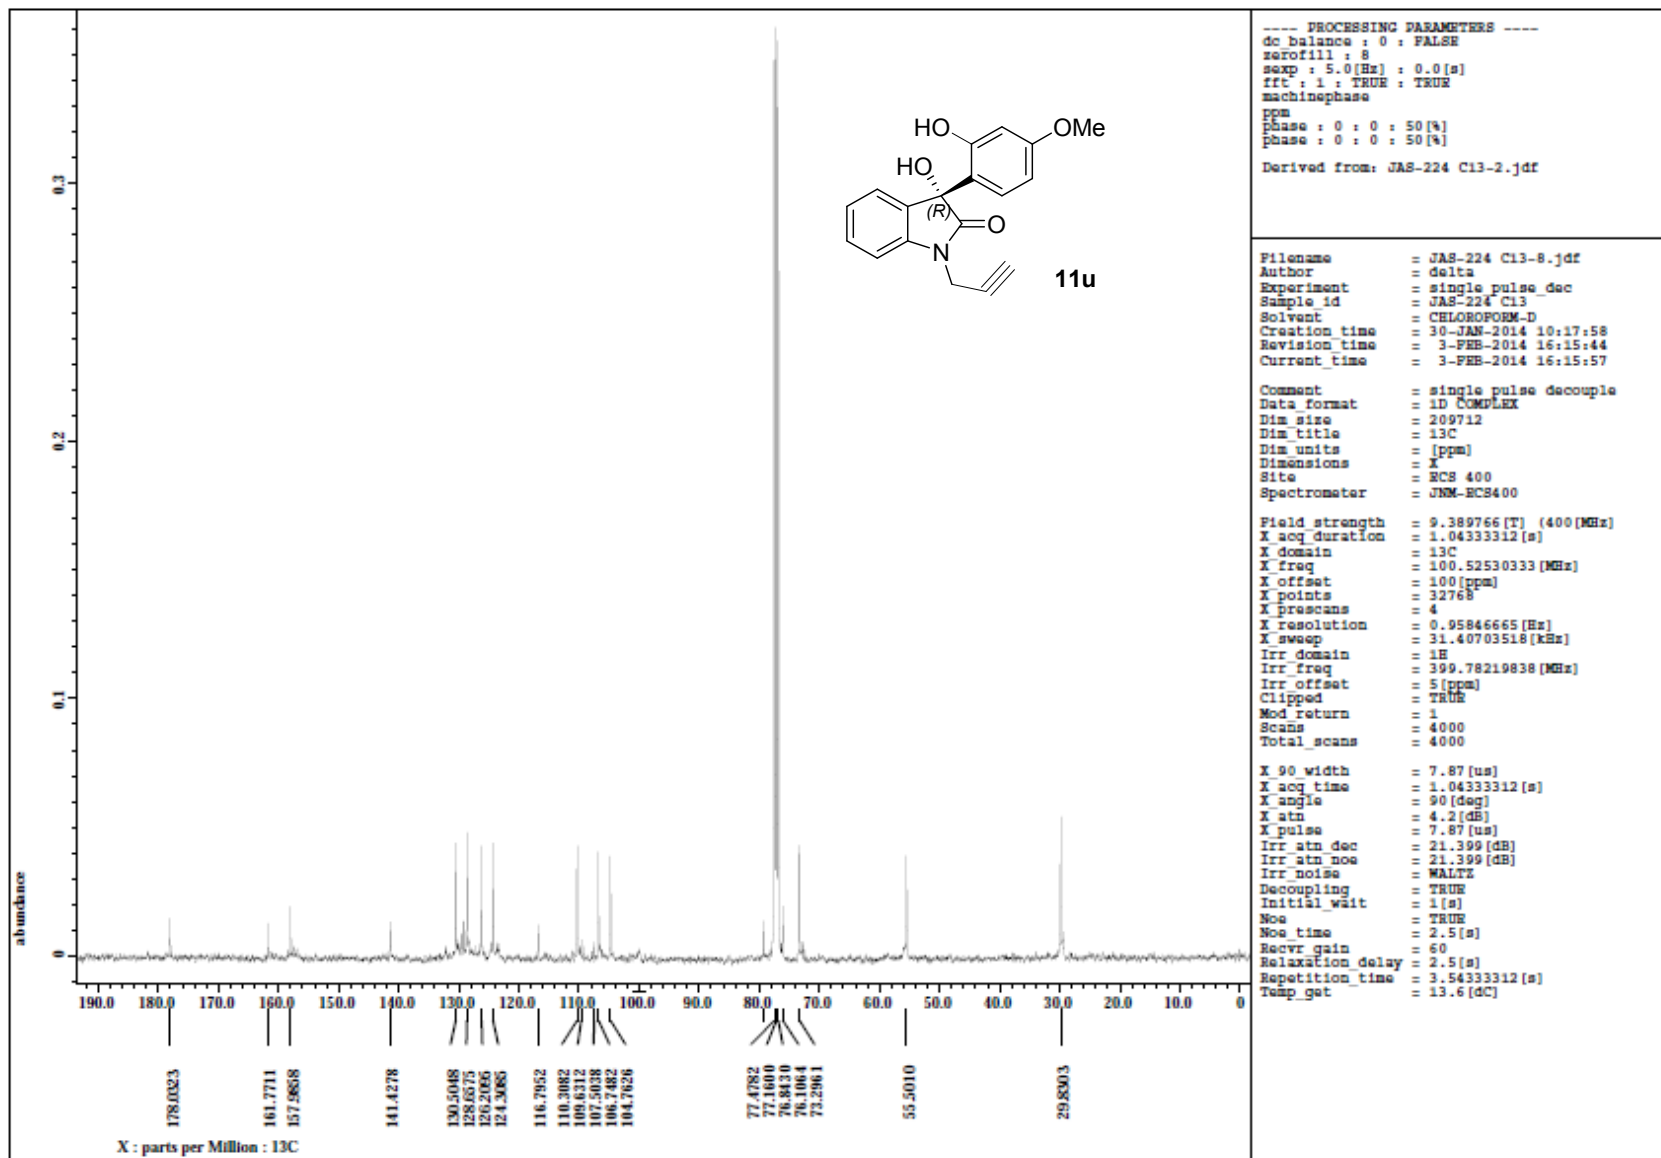

oct 6, 2014  
JAS-N2

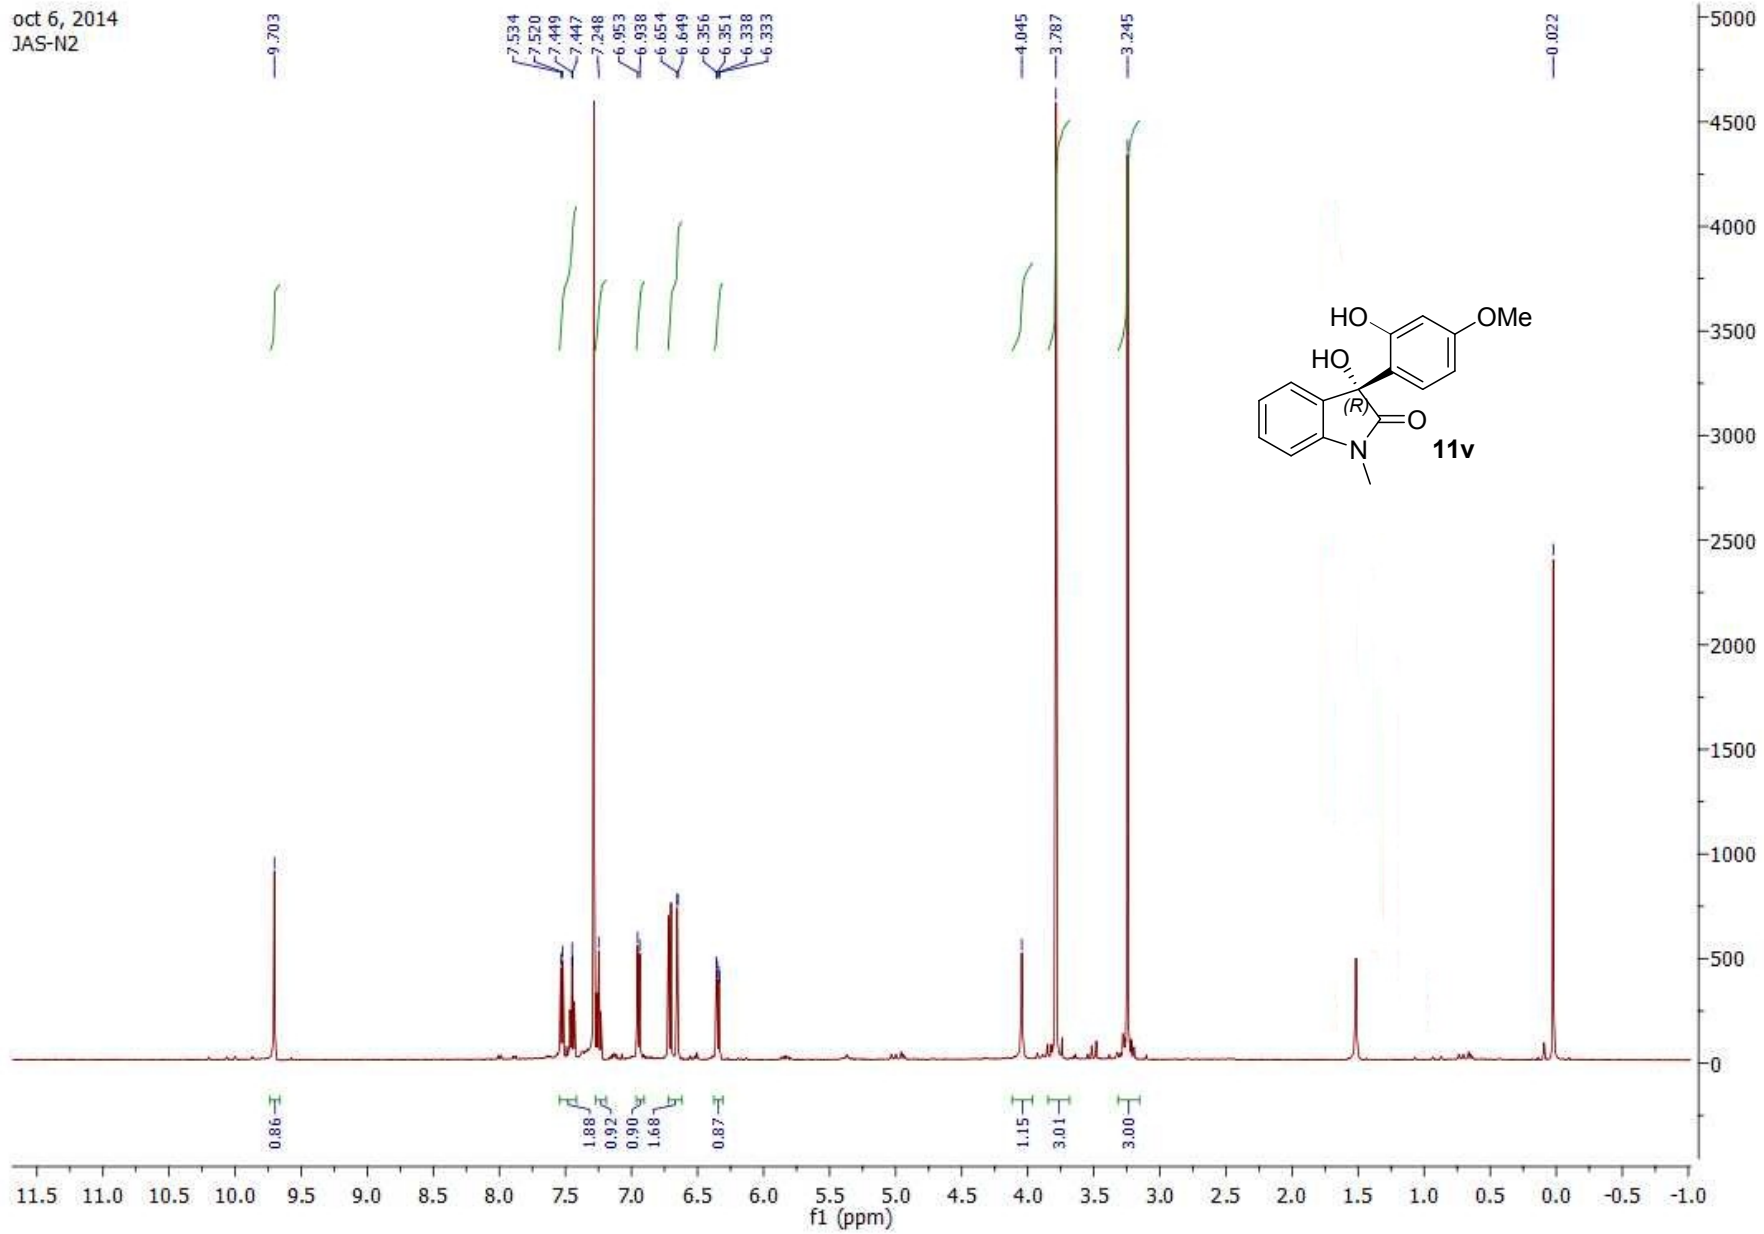



oct 6, 2014  
JAS-N2

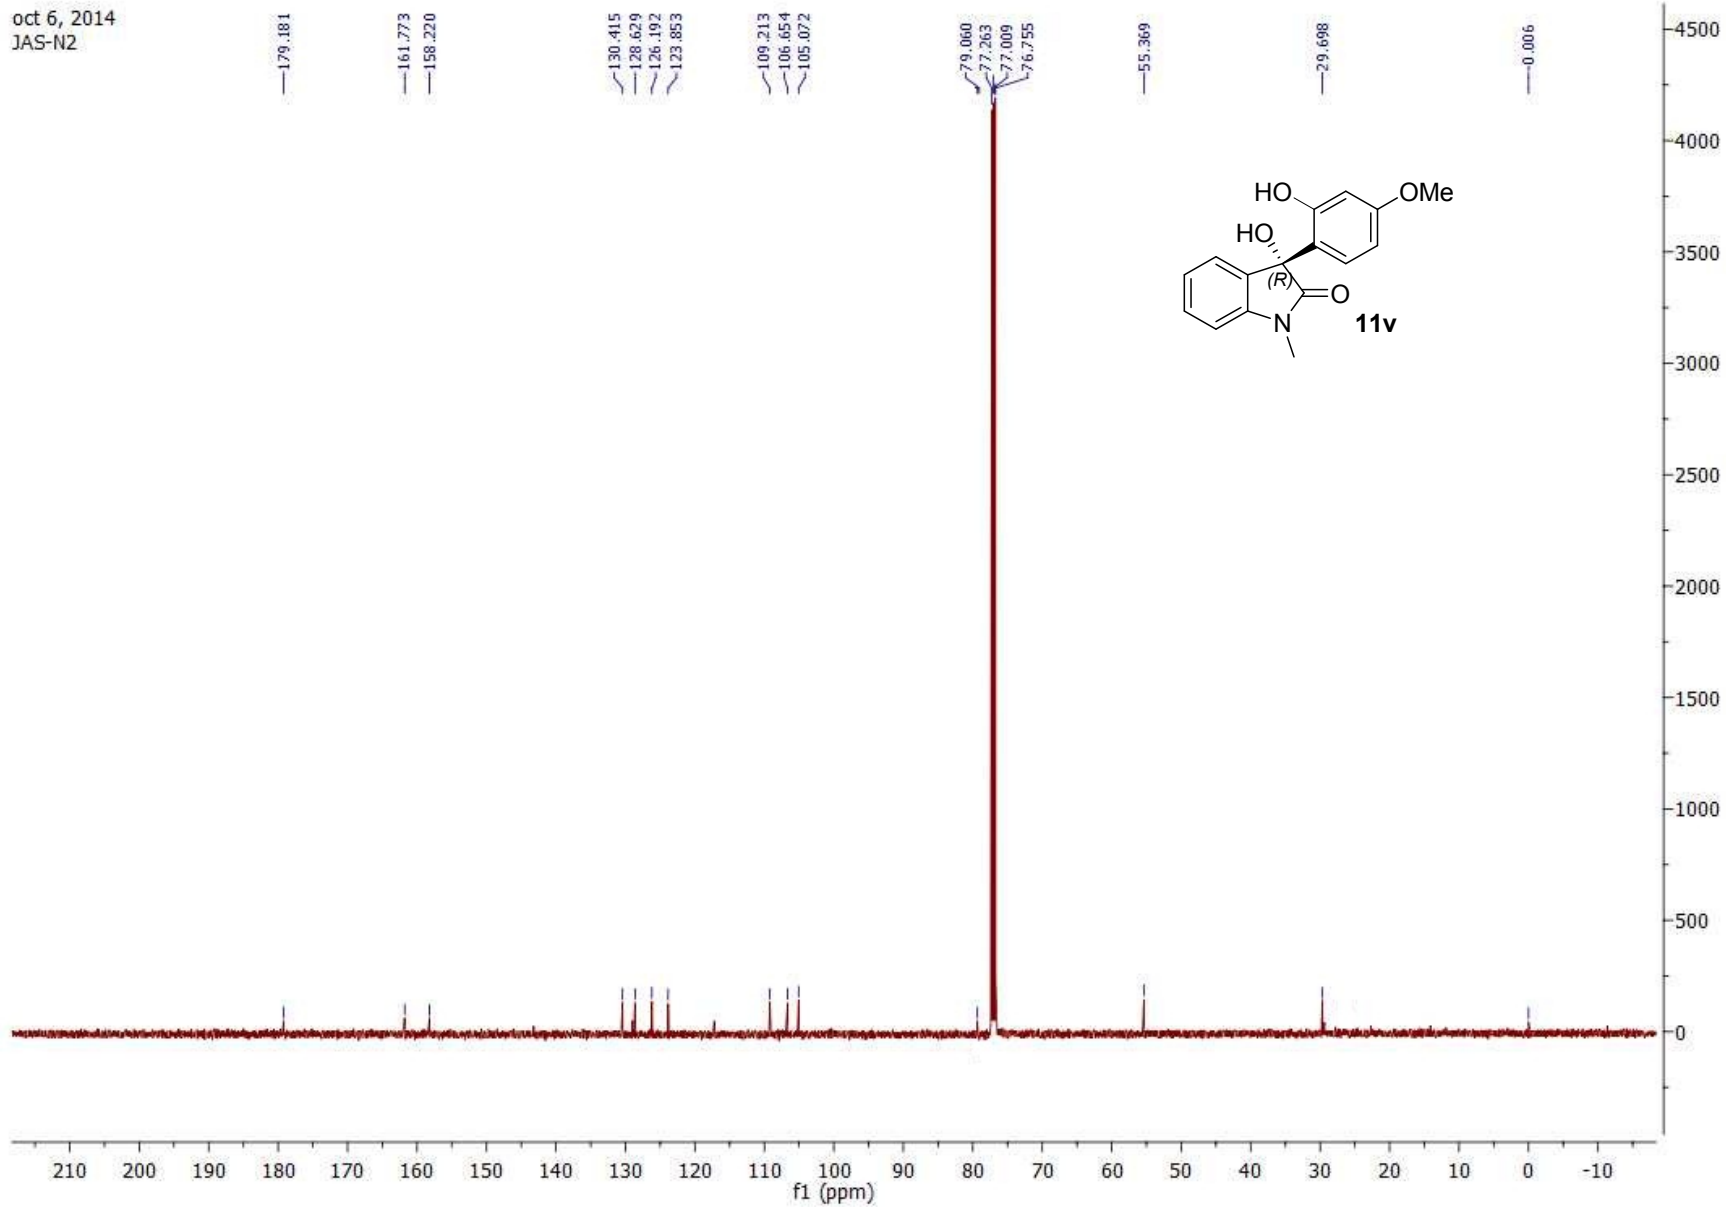

C:\Users\technologies\Desktop\indoles\all DMP data\New folder\nmr dmphenols\Dr\_Chimni\C-JAS2201NON\_E4\_FT.als

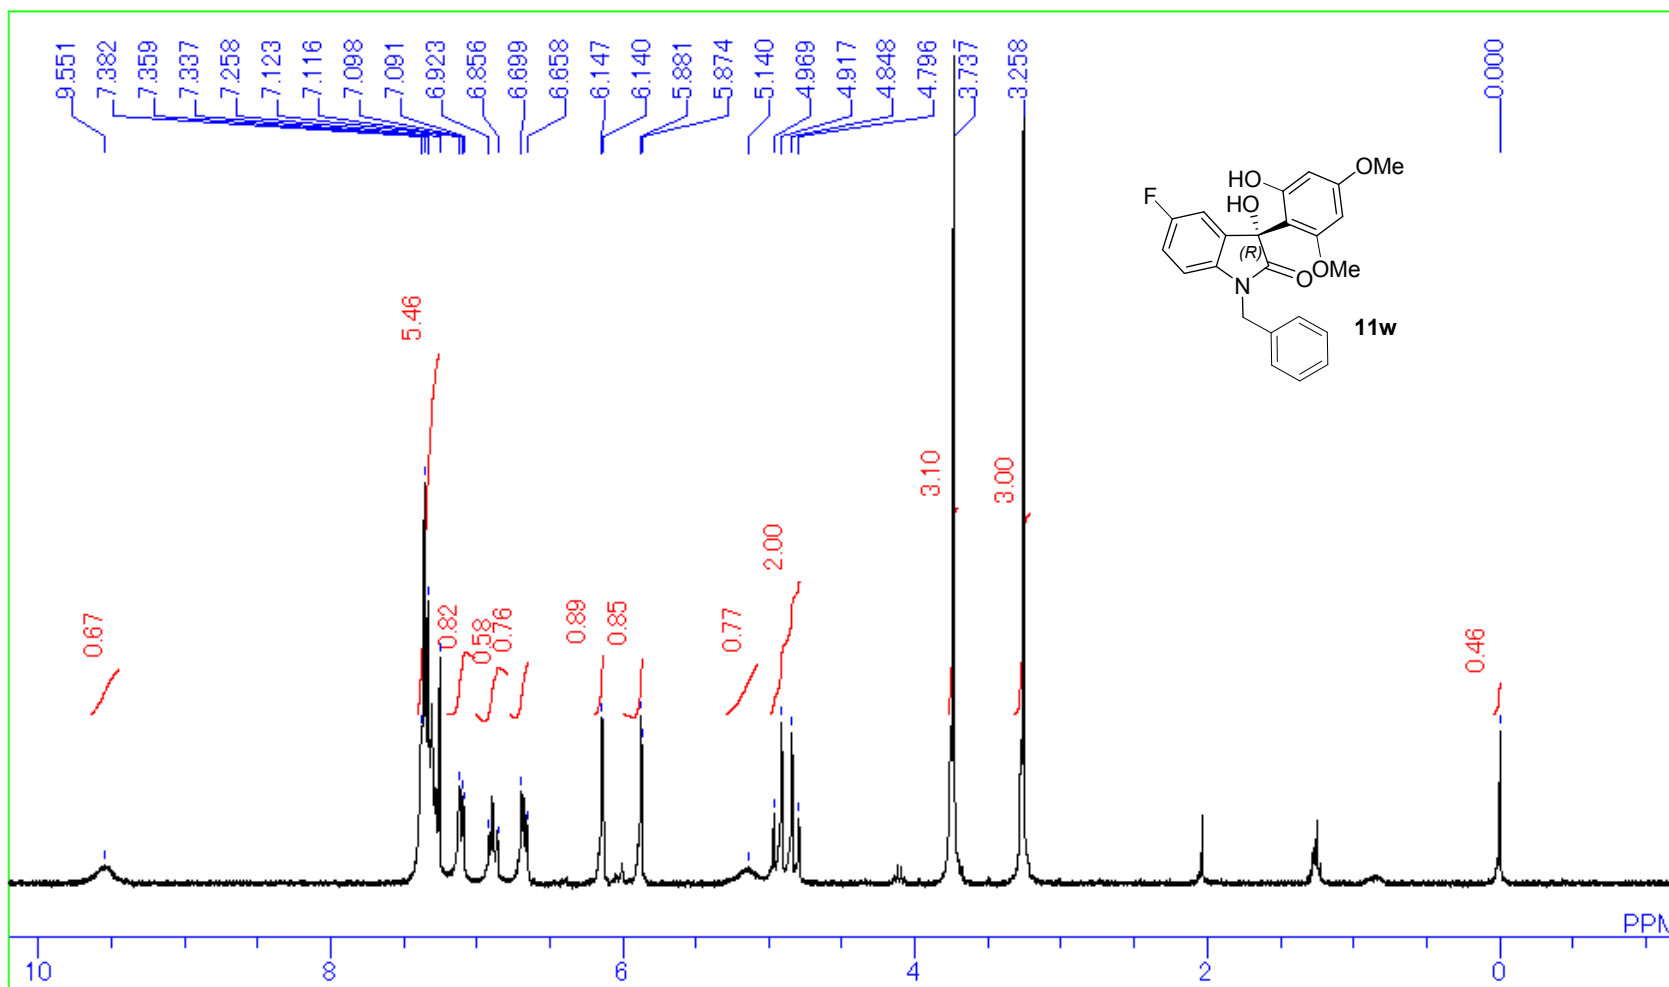

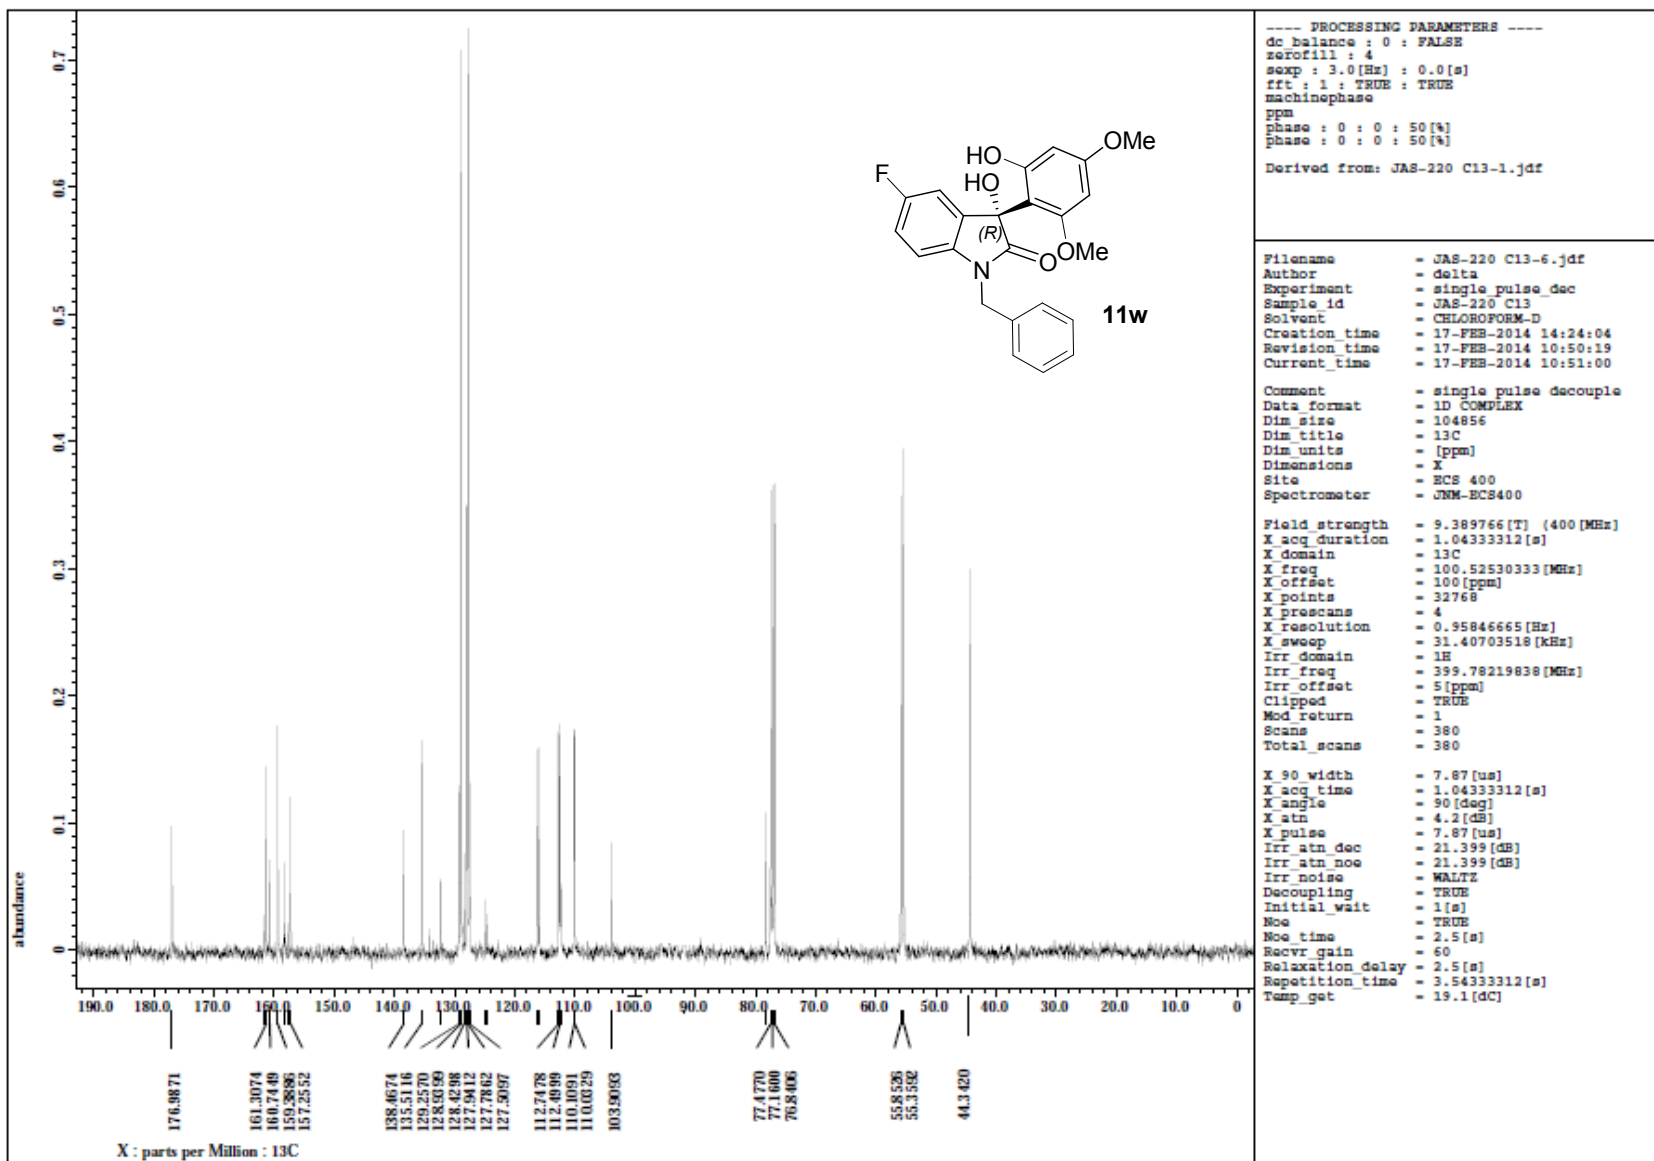

SID 20 oct 2014  
SID-CLNA

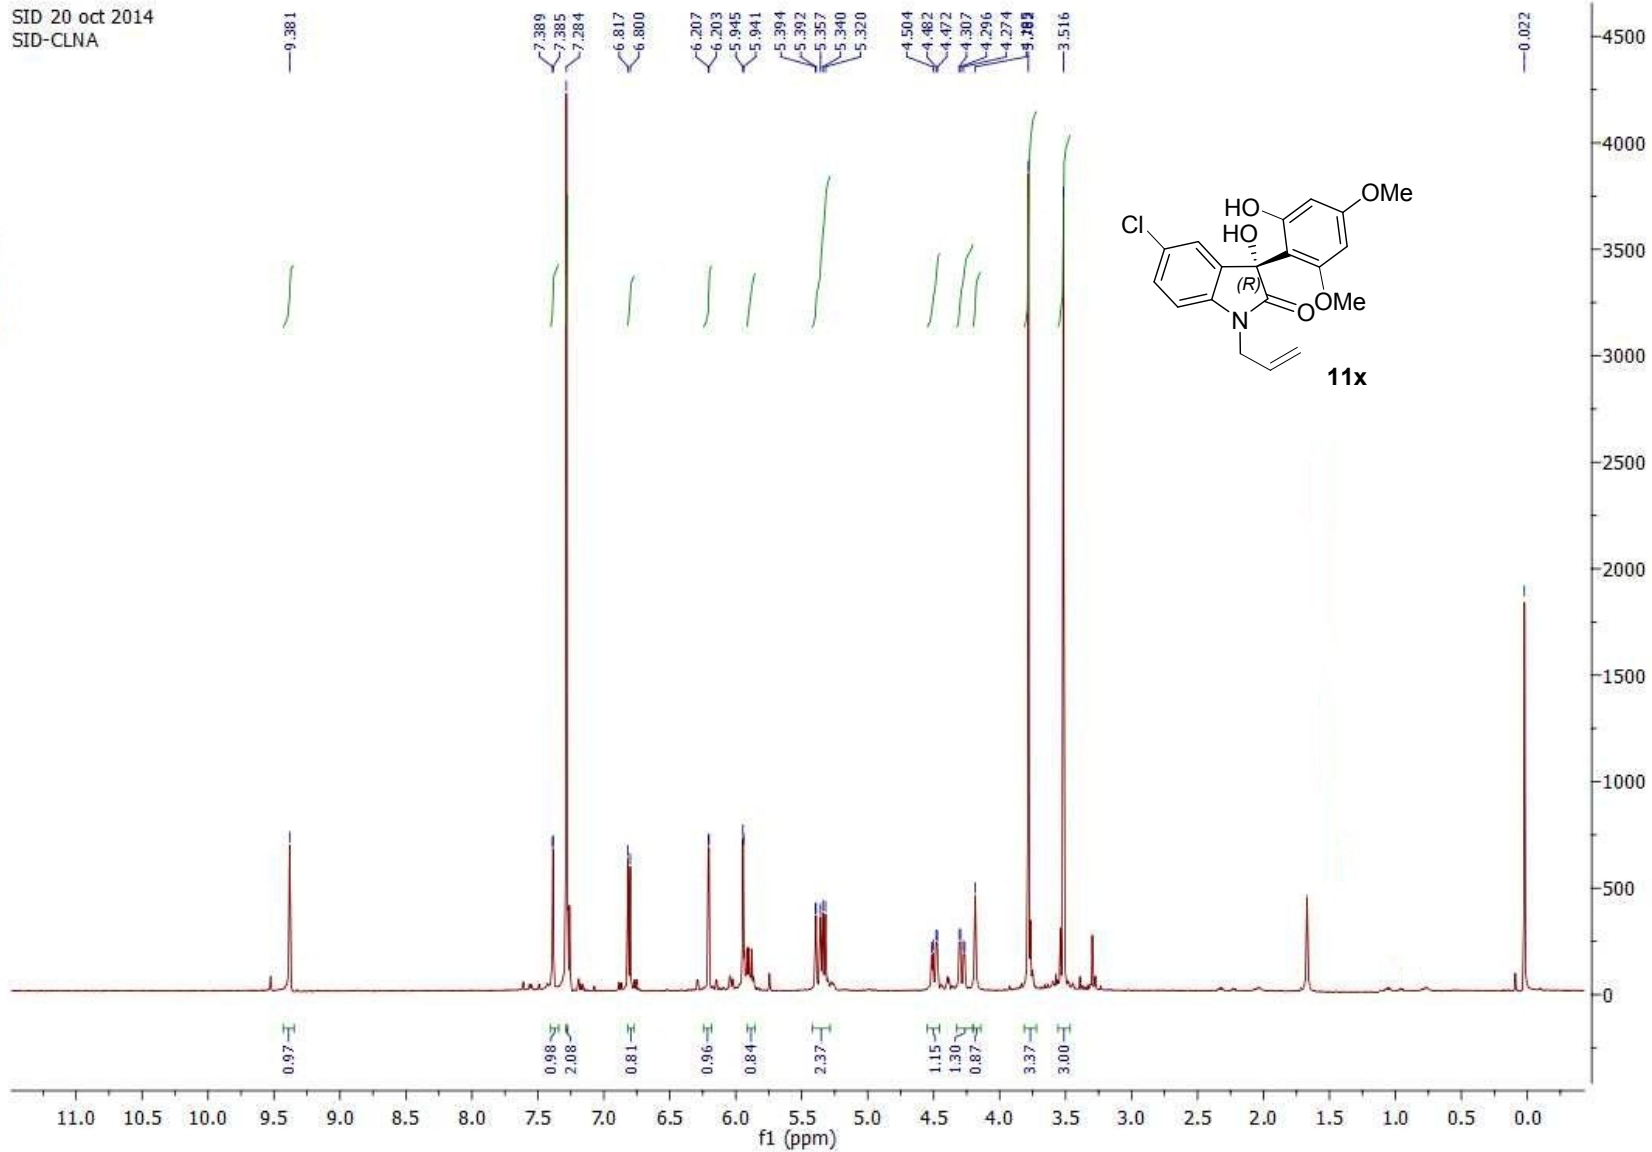

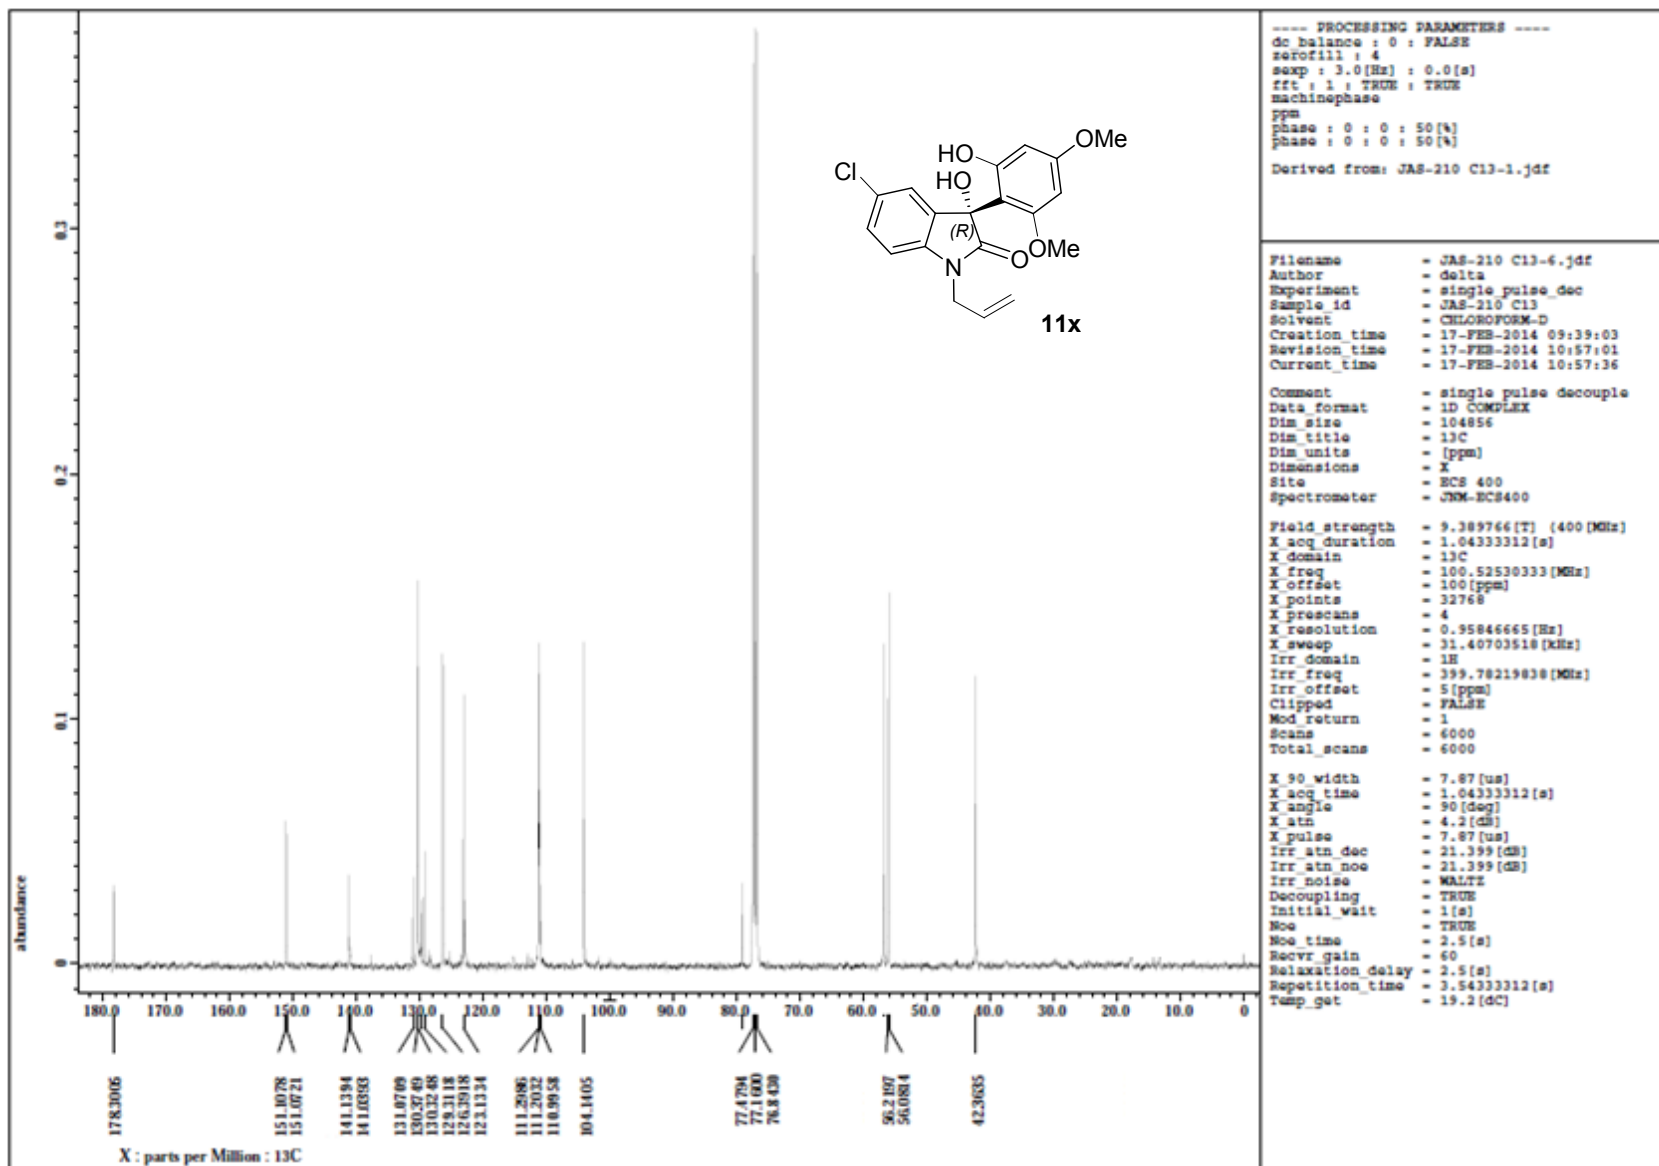

SID 20 oct 2014  
SID-NPG

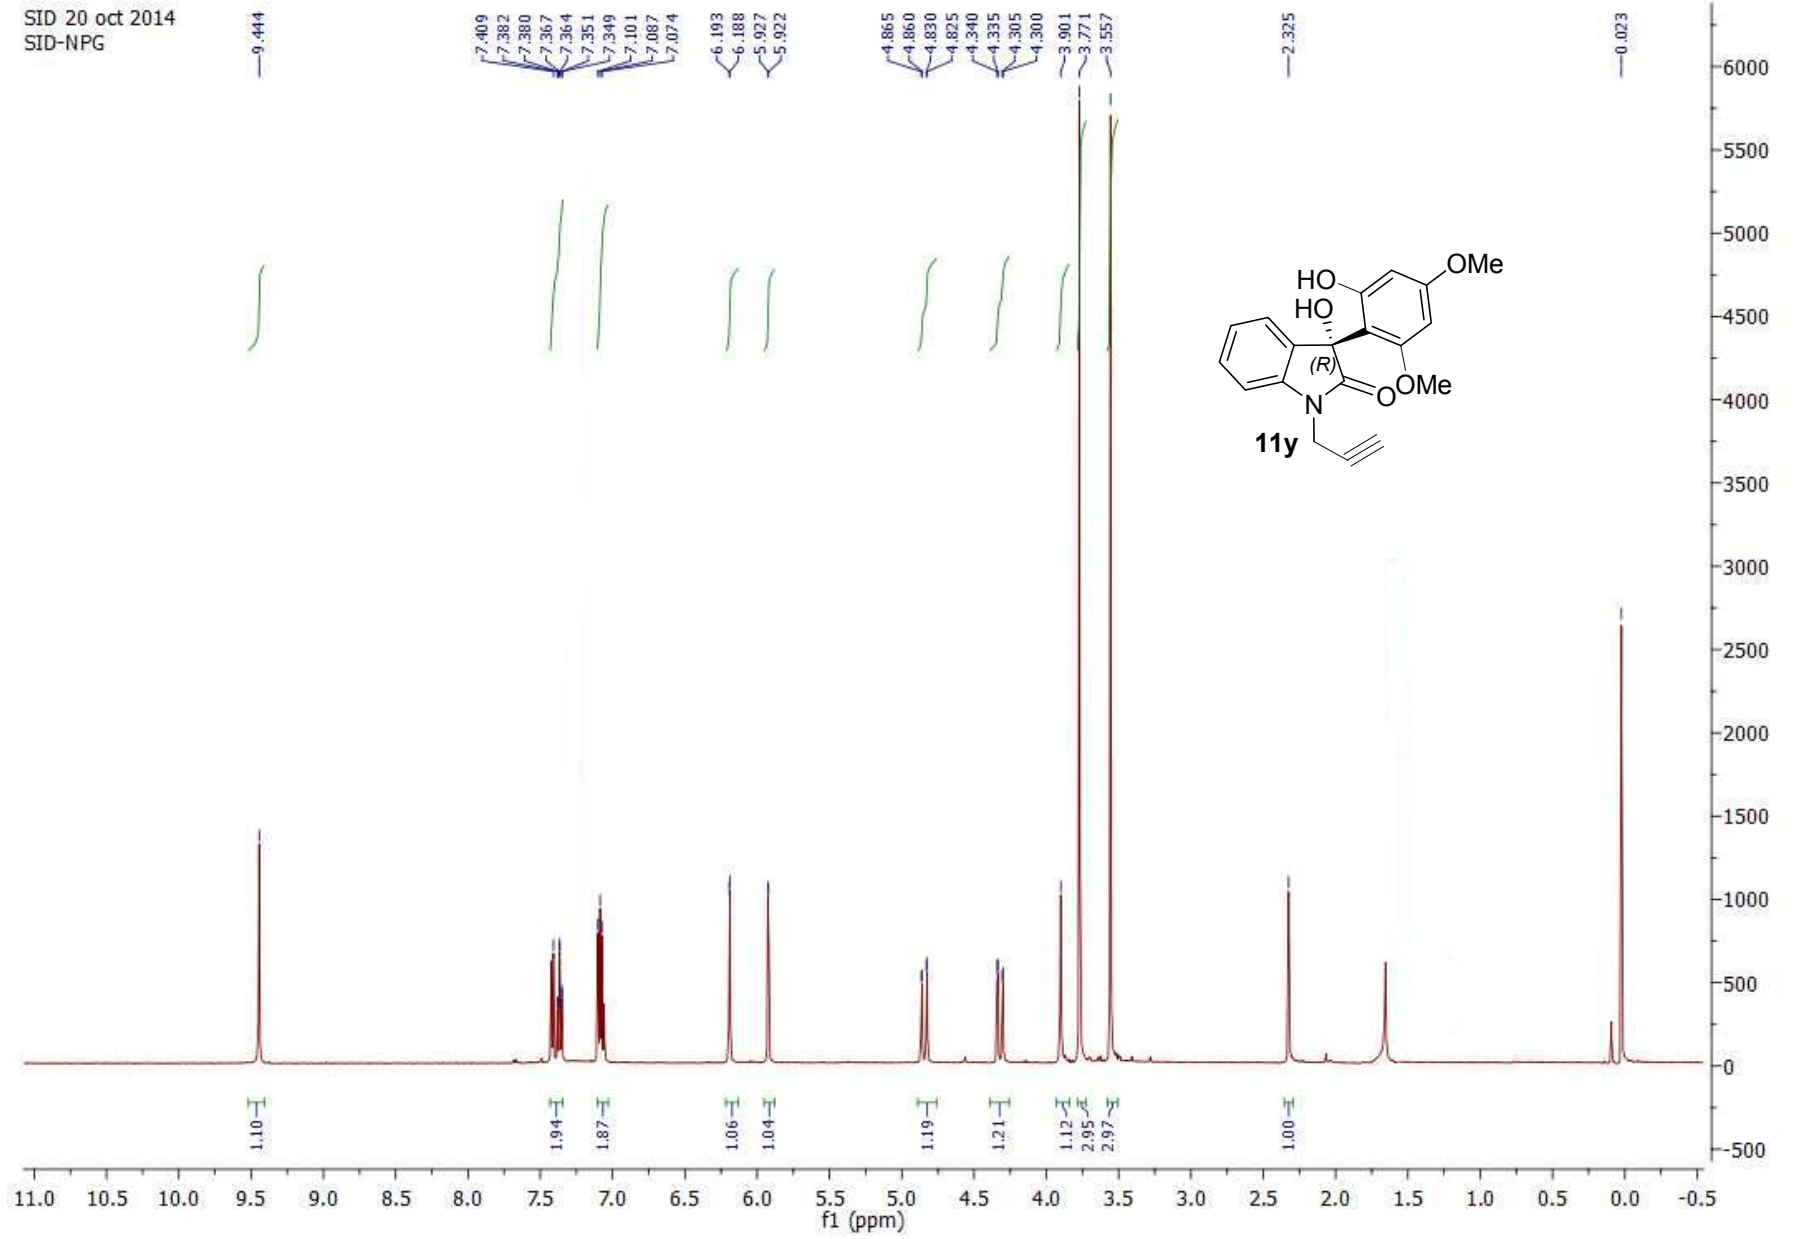

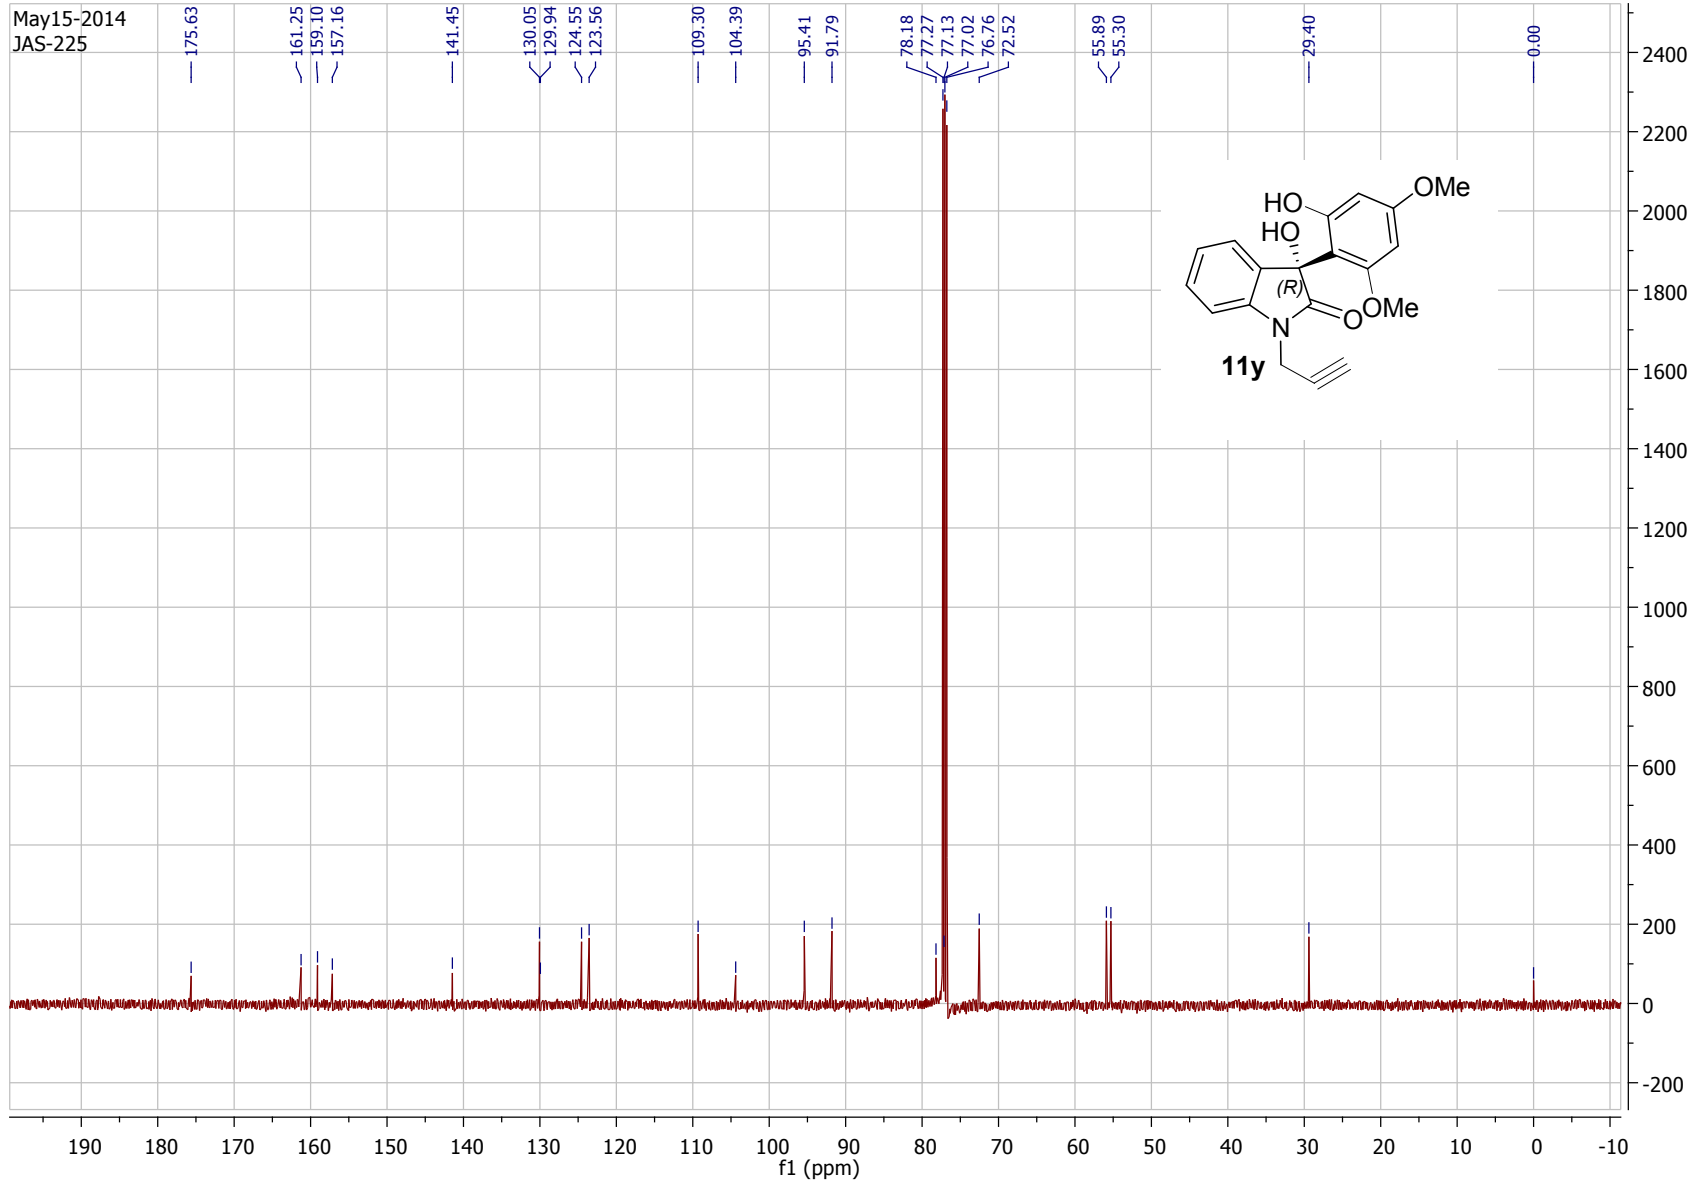

C:\Users\technologies\Desktop\maleimide nmrs\Dr\_Chimni\cjas500.als

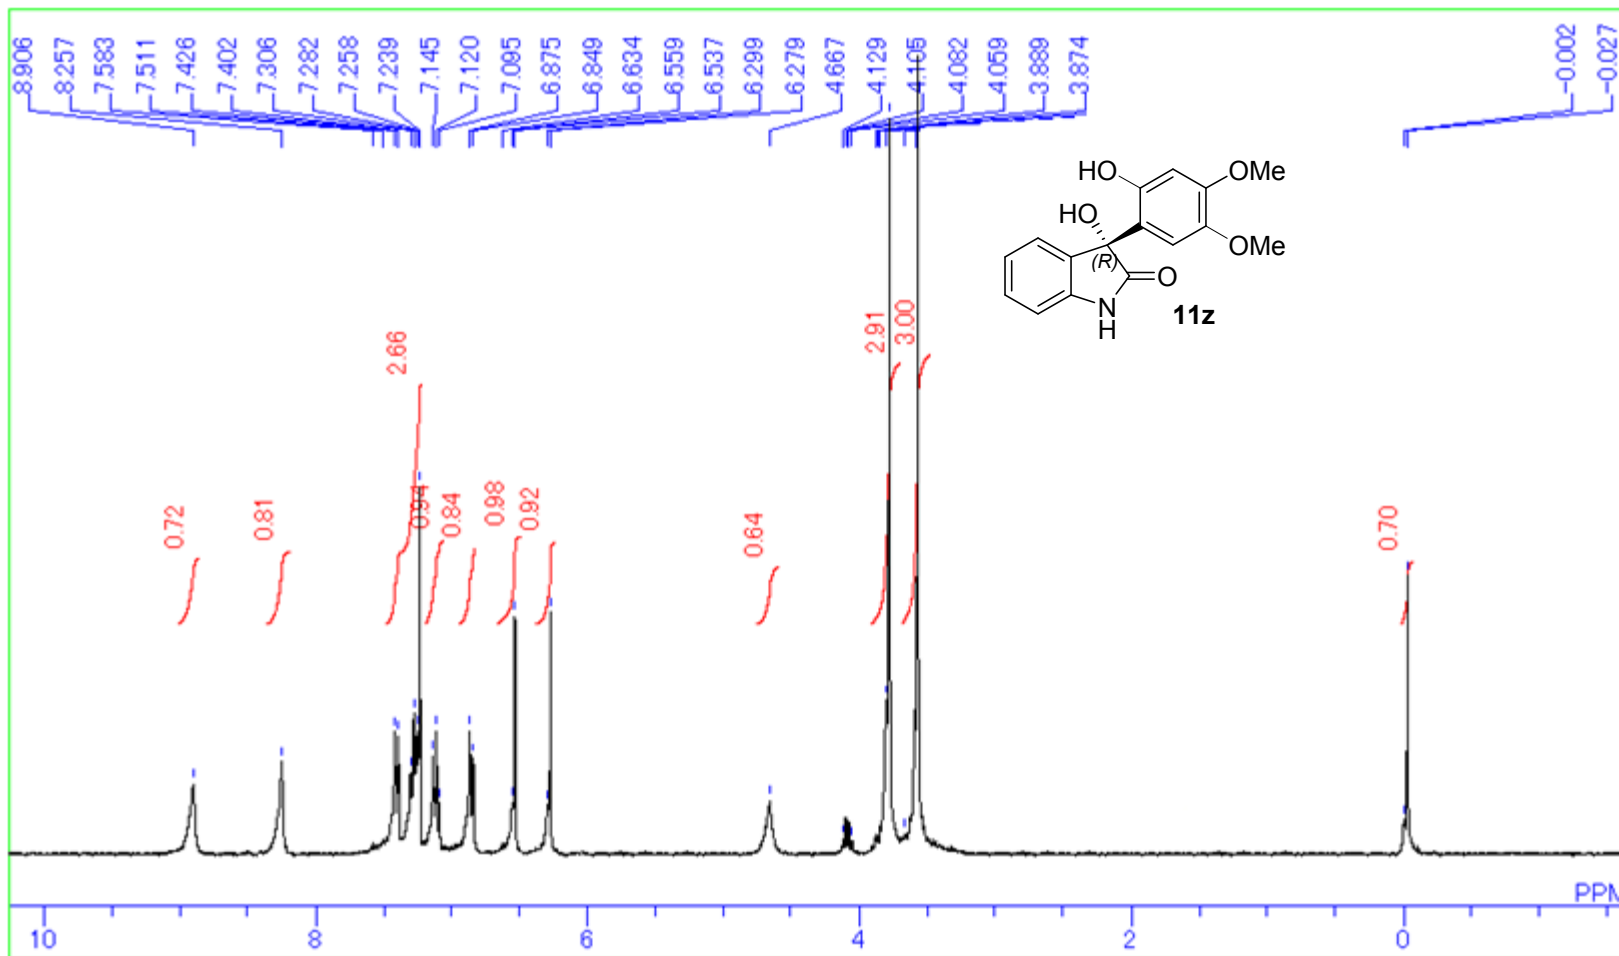



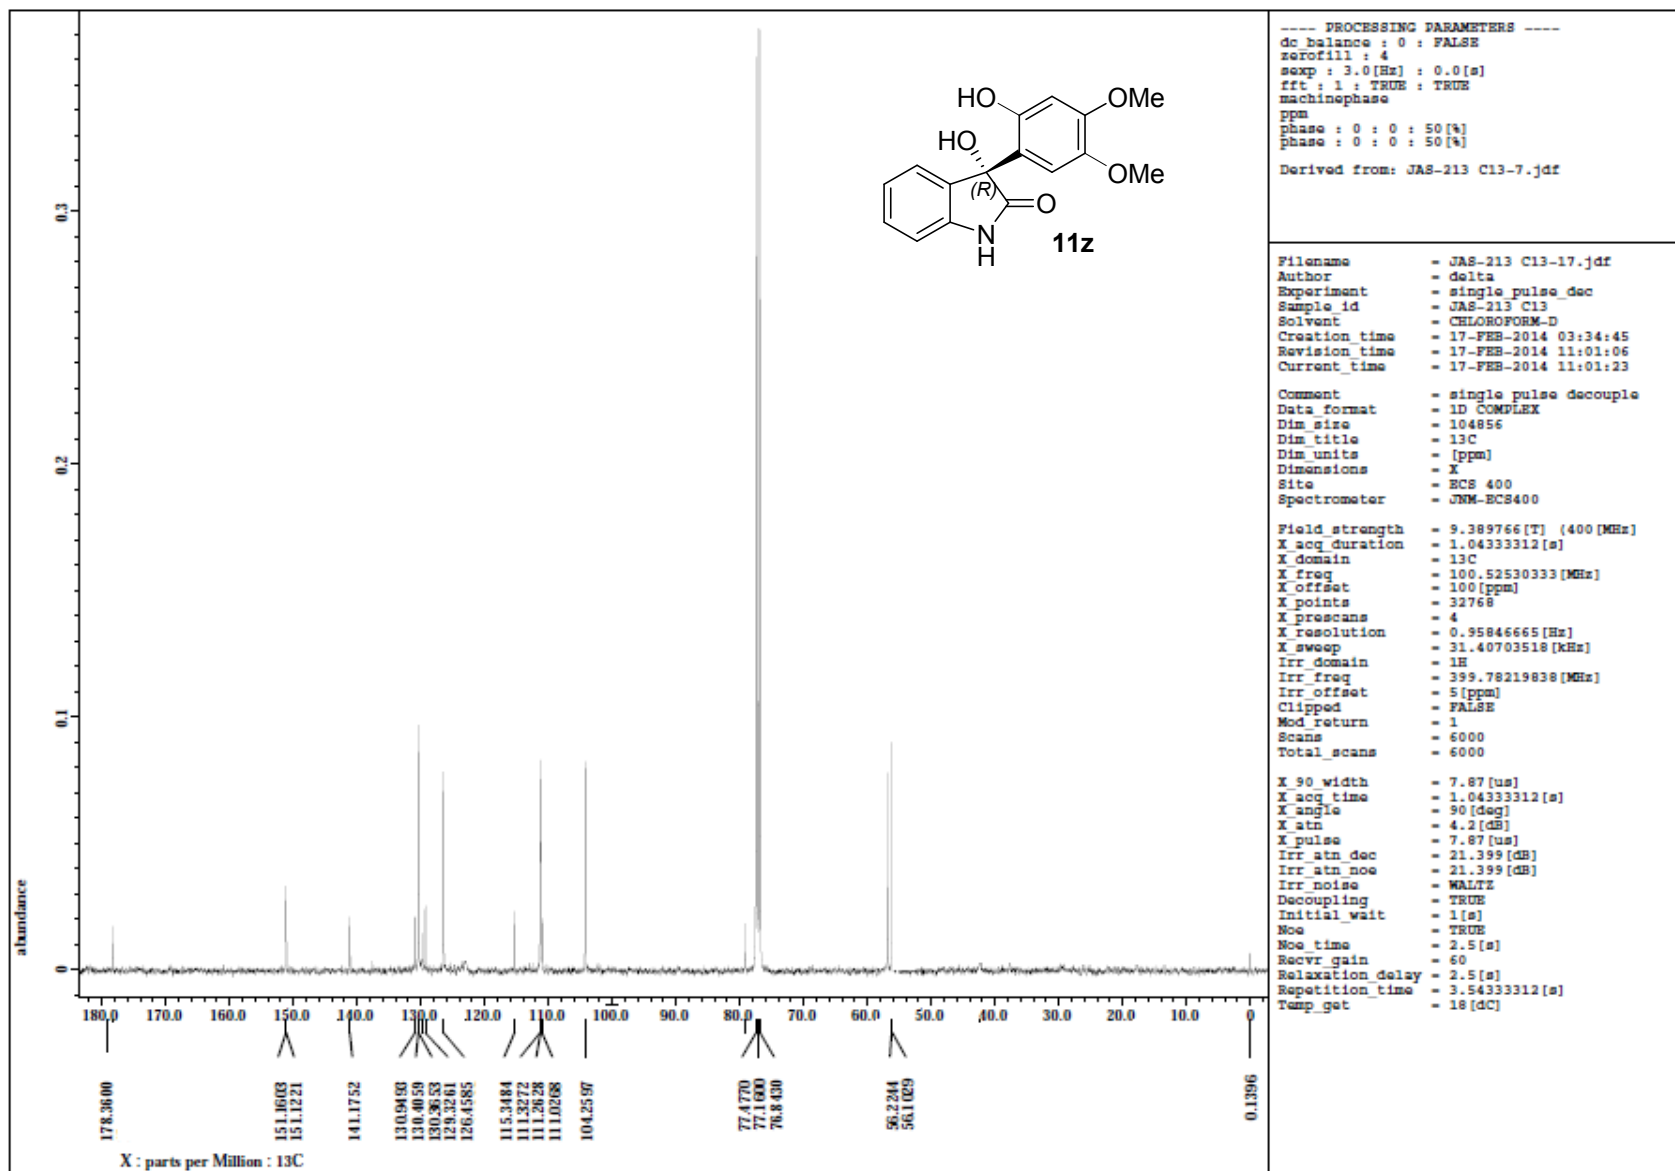

21 oct 2014  
jas-qp

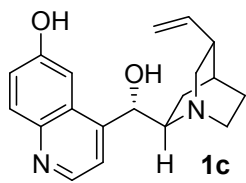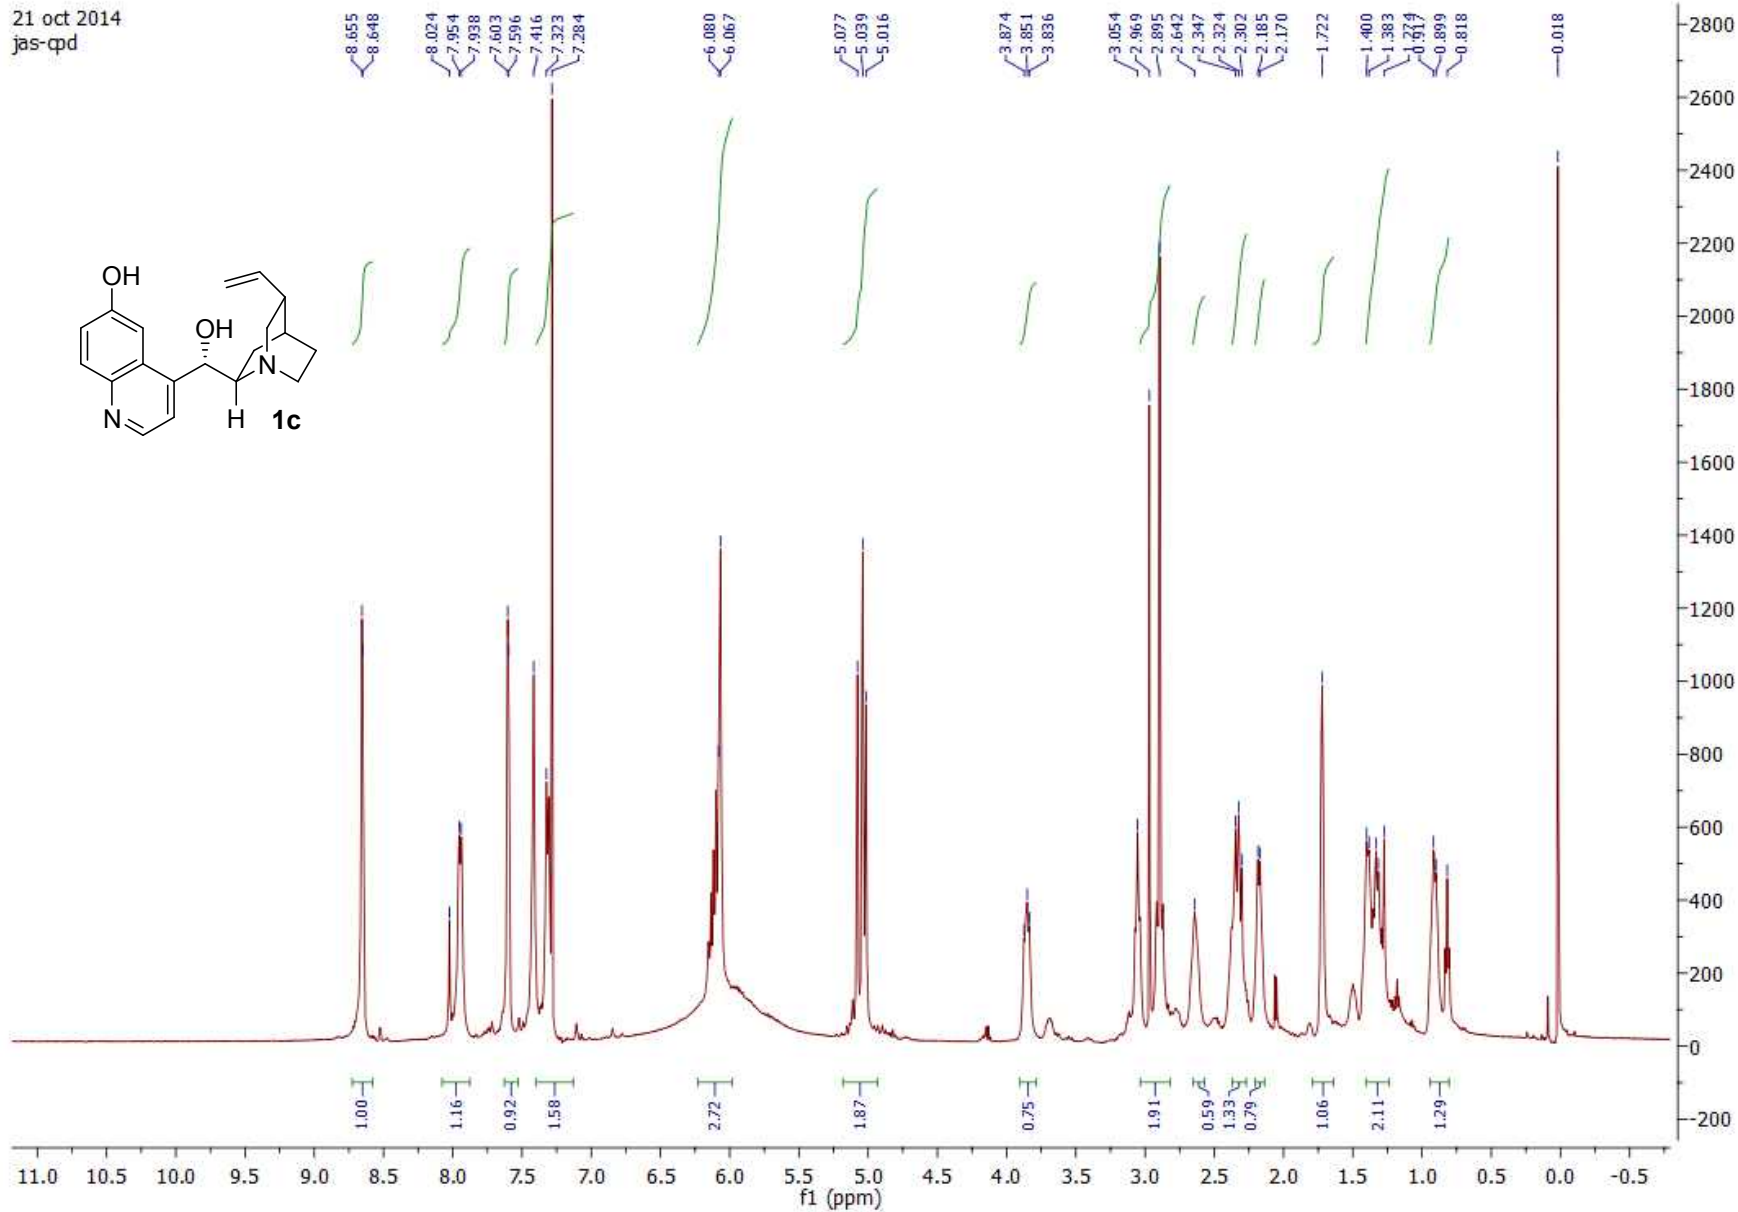

21 oct 2014  
jas-qp4

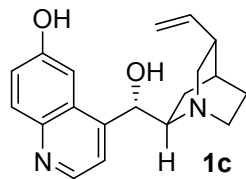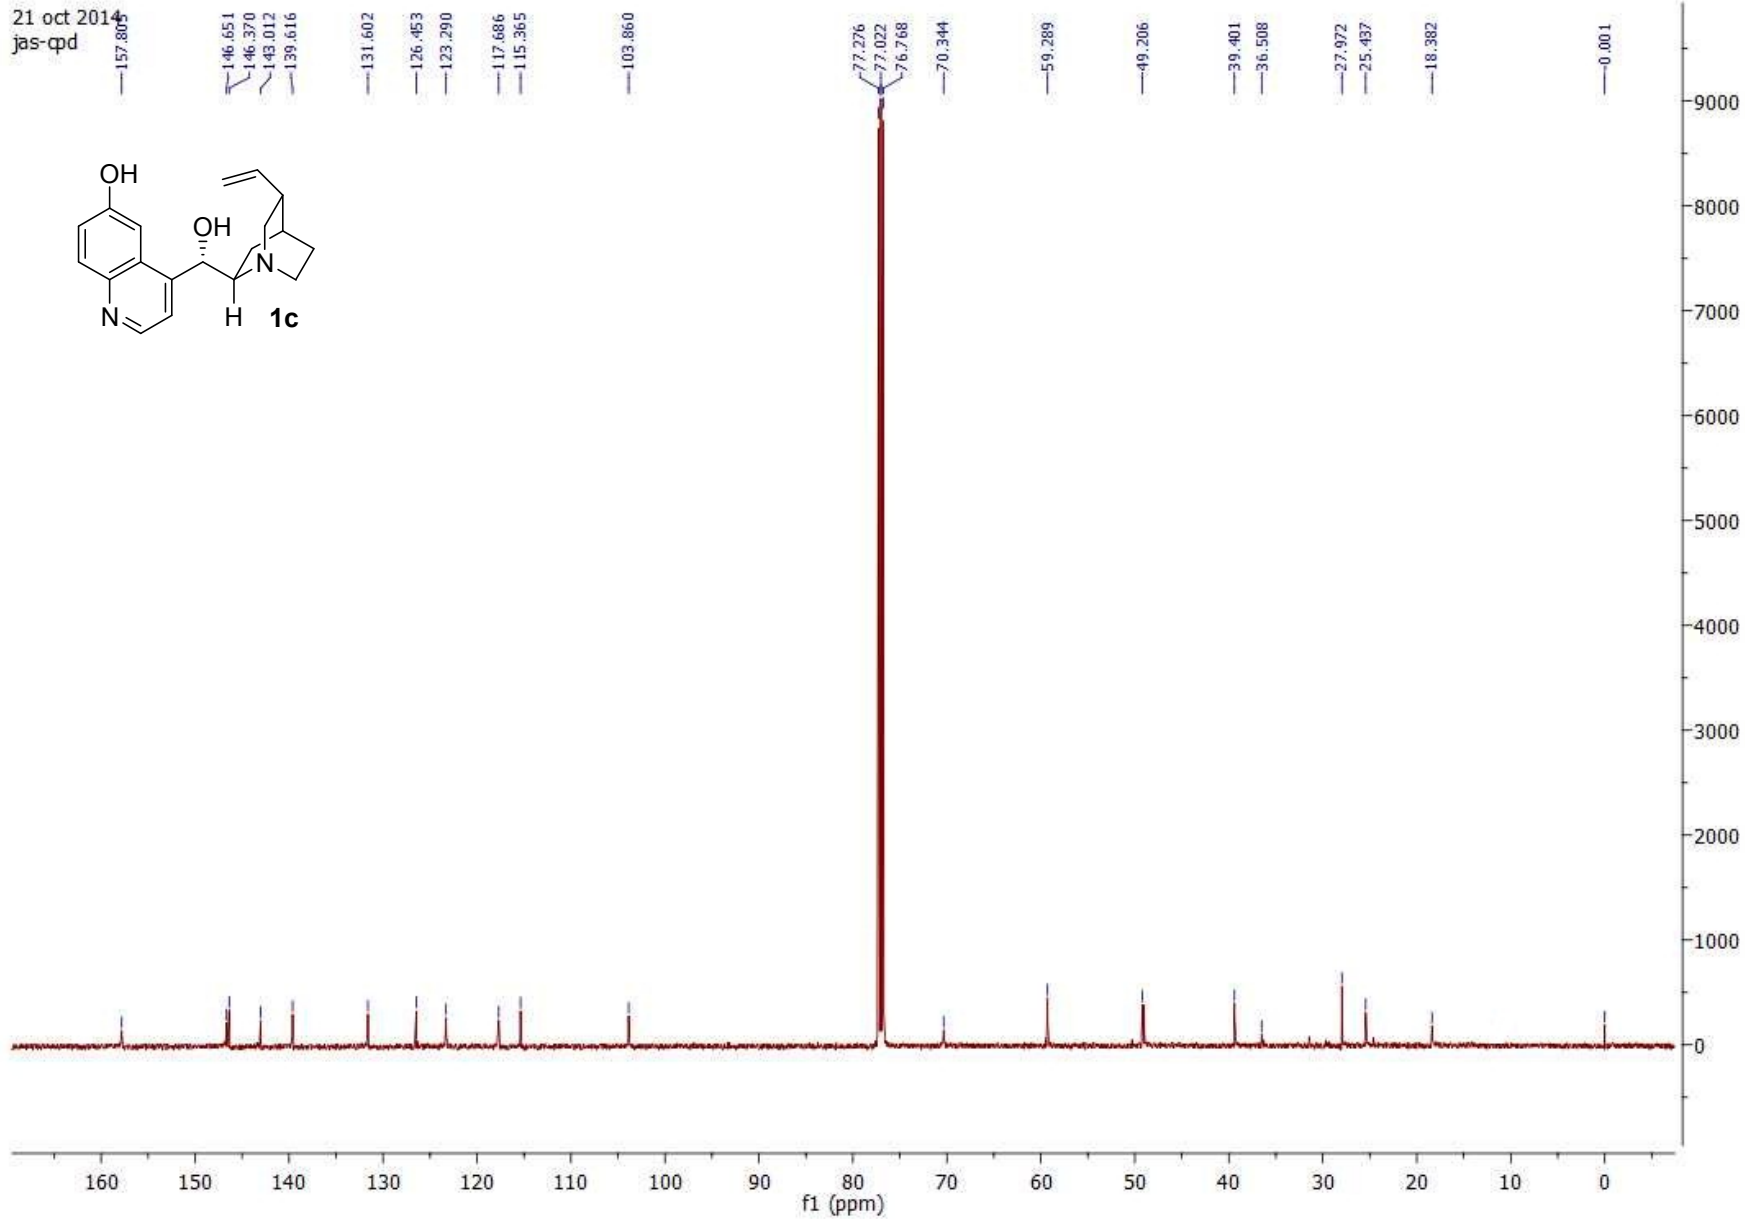

SID 22 oct 2014  
SID-BCD

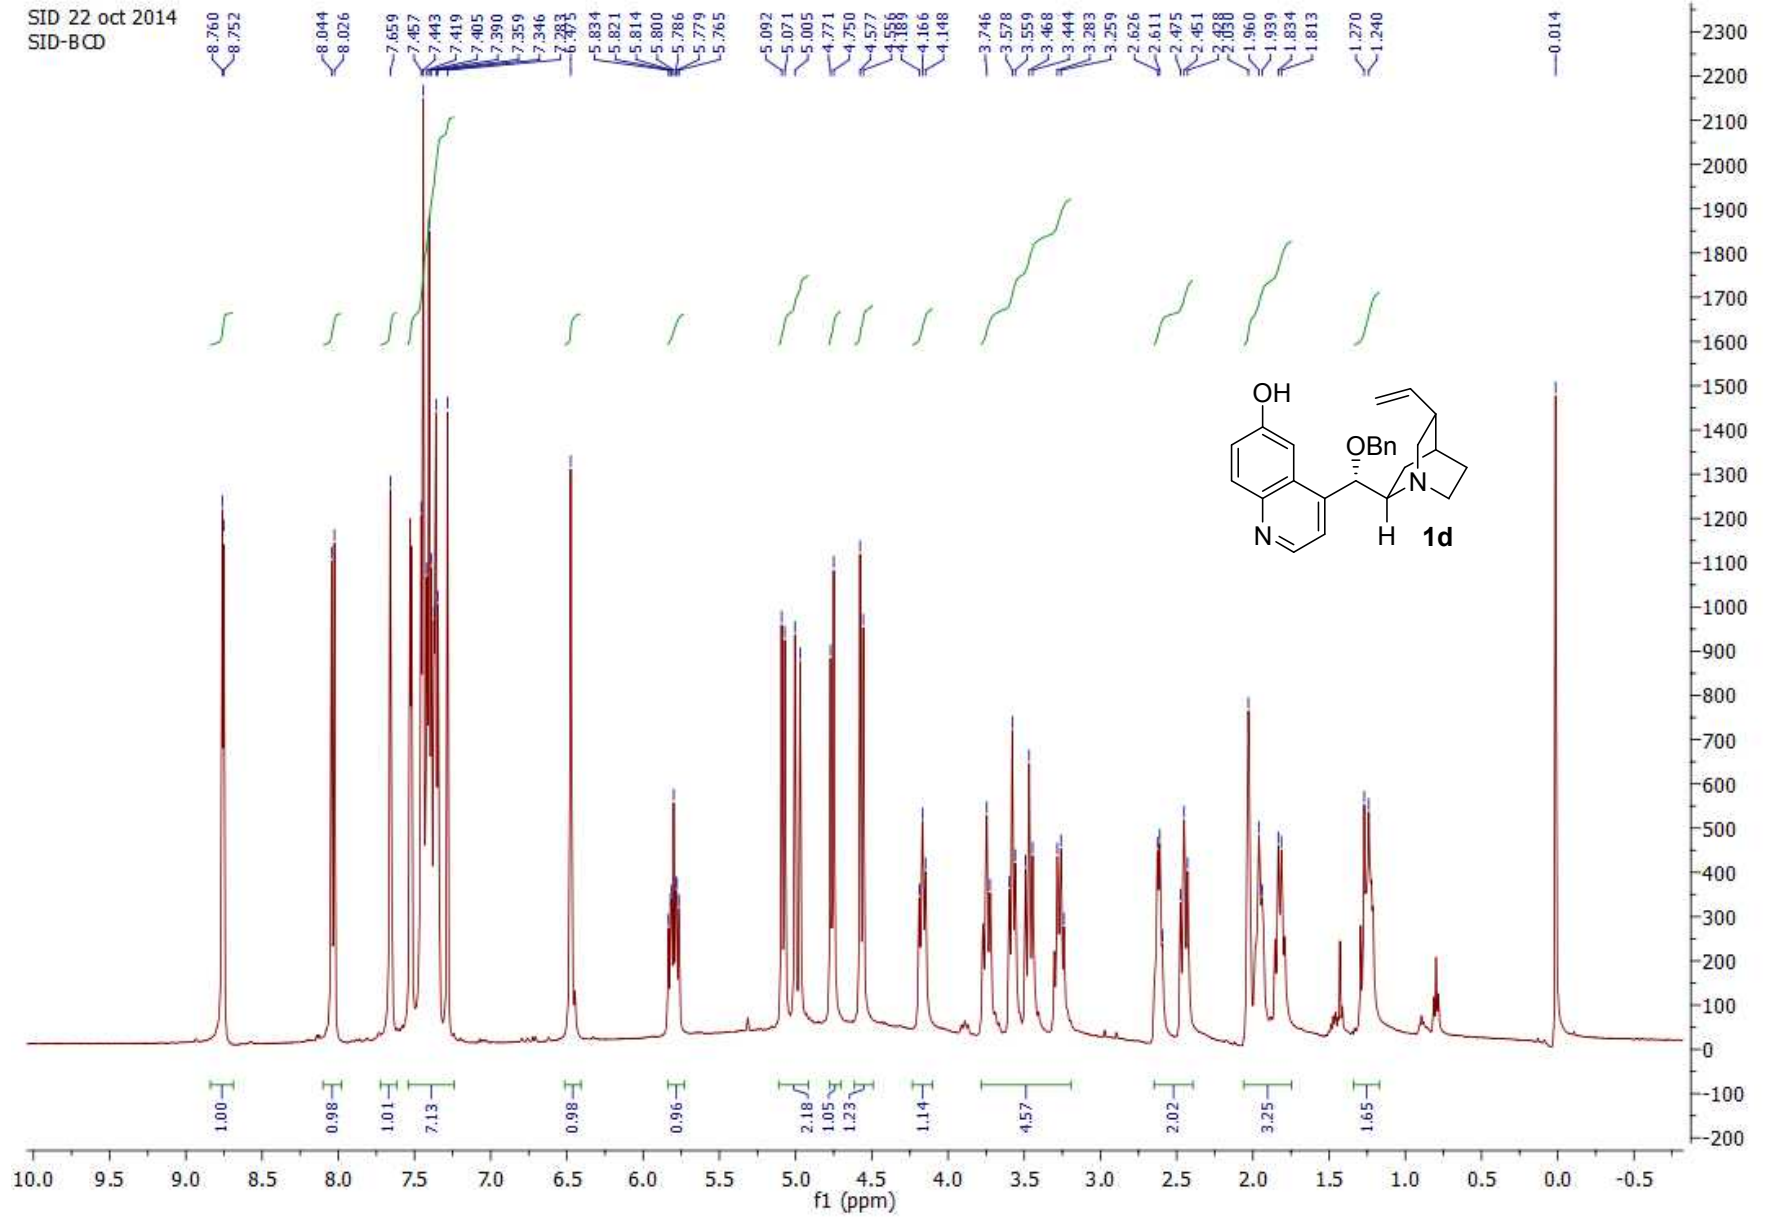

SID 22 oct 2014  
SID-BCD

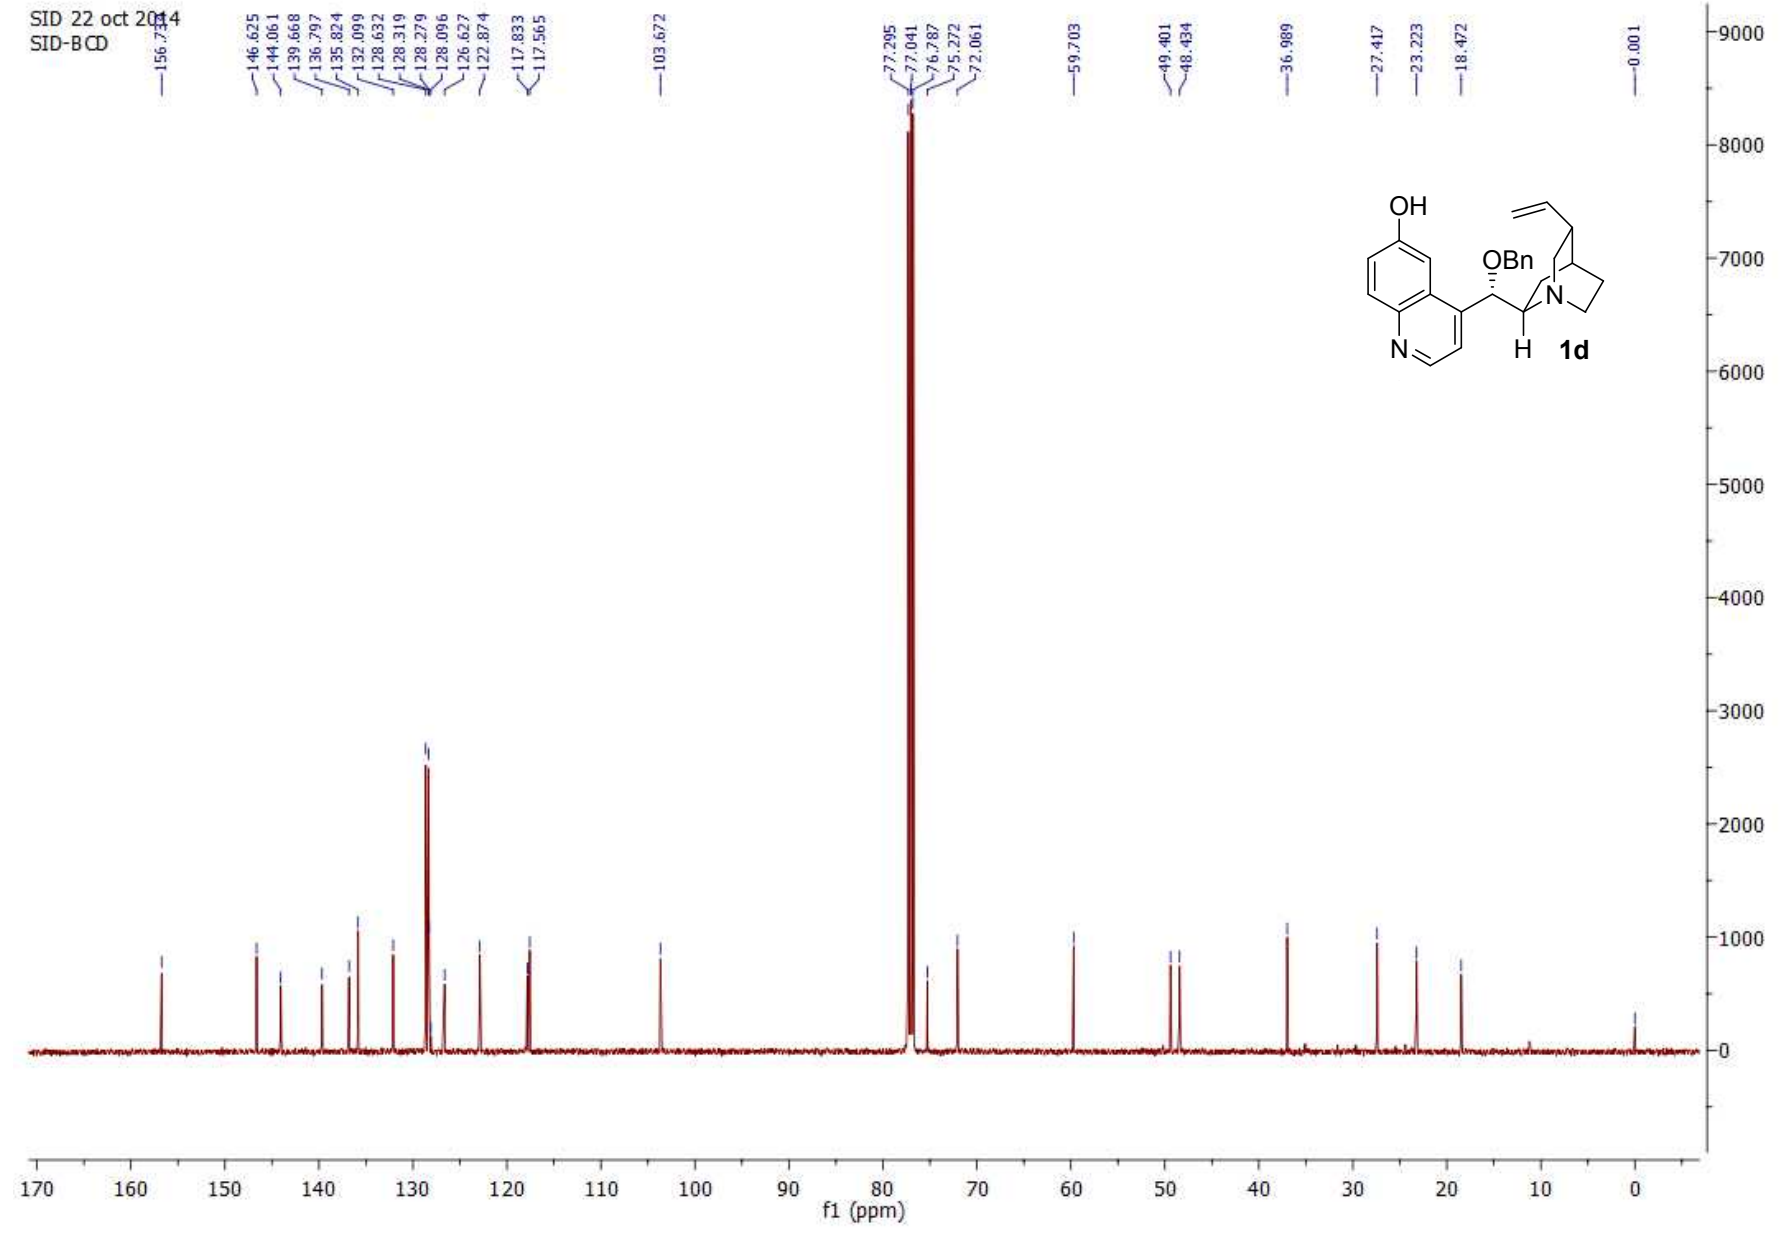

GAL-6-OH-Q

CPN

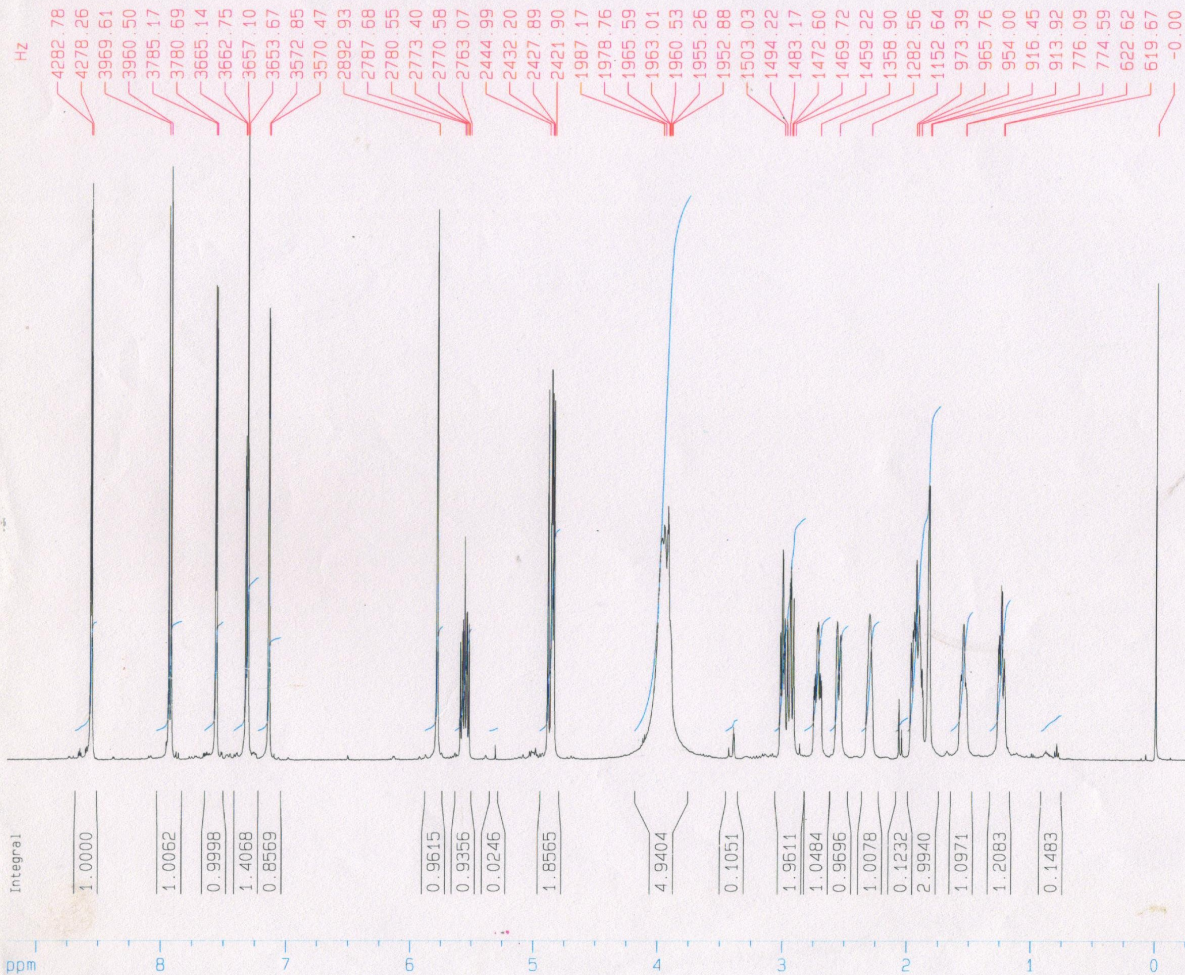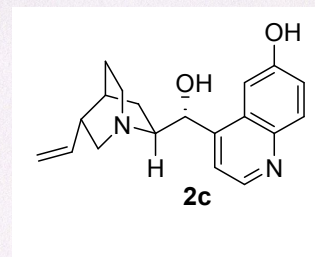

NS 16  
 DS 2  
 SWH 12531.328 Hz  
 FIDRES 0.191213 Hz  
 AQ 2.6149764 sec  
 RG 181  
 DW 39.900 usec  
 DE 6.00 usec  
 TE 683.6 K  
 D1 1.00000000 sec  
 MCREST 0.00000000 sec  
 MCWRK 0.01500000 sec

===== CHANNEL f1 =====  
 NUC1 1H  
 P1 9.00 usec  
 PL1 -2.00 dB  
 SF01 500.1324719 MHz

F2 - Processing parameters  
 SI 32768  
 SF 500.1299871 MHz  
 WDW EM  
 SSB 0  
 LB 0.30 Hz  
 GB 0  
 PC 0.30

1D NMR plot parameters  
 CX 20.00 cm  
 CY 10.00 cm  
 F1P 9.237 ppm  
 F1 4619.89 Hz  
 F2P -0.263 ppm  
 F2 -131.76 Hz  
 PPMCM 0.47504 ppm/cm  
 HZCM 237.58279 Hz/cm

CPN

R-CPN

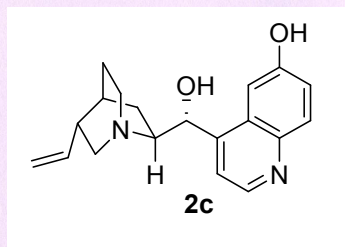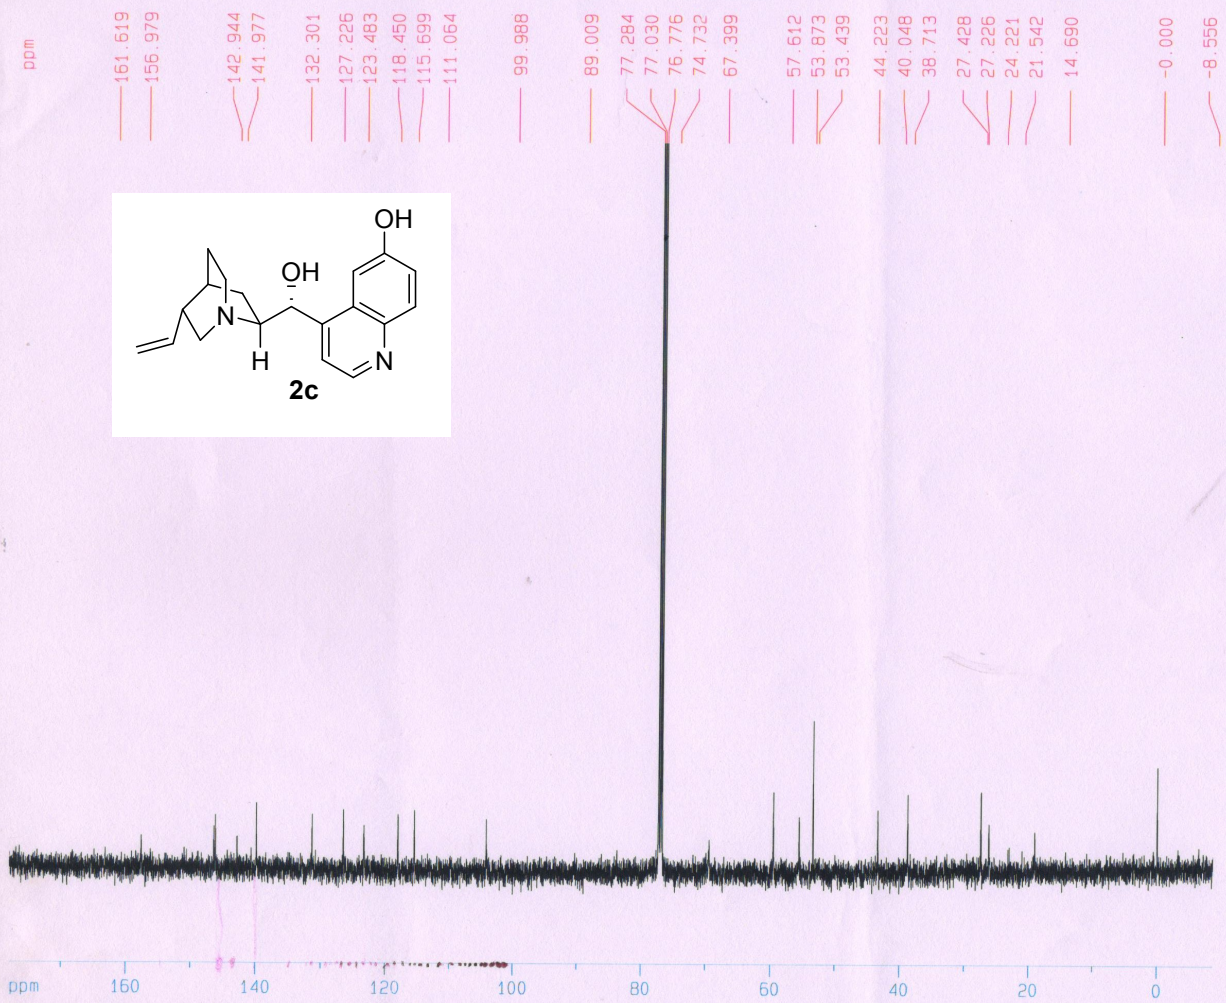

Current Data Parameters  
 NAME Apr09-2010-purnima  
 EXPNO 12  
 PROCNO 1

F2 - Acquisition Parameters  
 Date\_ 20100409  
 Time 13.35  
 INSTRUM av500  
 PROBHD 5 mm BBO BB-1H  
 PULPROG zgpg30  
 TD 65536  
 SOLVENT CDC13  
 NS 1024  
 DS 2  
 SWH 31446.541 Hz  
 FIDRES 0.479836 Hz  
 AQ 1.0420883 sec  
 RG 3251  
 DW 15.900 usec  
 DE 6.00 usec  
 TE 683.1 K  
 D1 1.00000000 sec  
 d11 0.03000000 sec  
 DELTA 0.89999998 sec  
 MCREST 0.00000000 sec  
 MCWRK 0.01500000 sec

===== CHANNEL f1 =====  
 NUC1 13C  
 P1 7.60 usec  
 PL1 0.00 dB  
 SFO1 125.7703643 MHz

===== CHANNEL f2 =====  
 CPDPRG2 waitz16  
 NUC2 1H  
 PCPD2 80.00 usec  
 PL2 -2.00 dB  
 PL12 17.00 dB  
 PL13 21.00 dB  
 SFO2 500.1320005 MHz

F2 - Processing parameters  
 SI 32768  
 SF 125.7577899 MHz  
 WDW EM  
 SSB 0  
 LB 1.00 Hz  
 GB 0  
 PC 1.80

1D NMR plot parameters  
 CX 20.00 cm  
 CY 2.00 cm  
 F1P 178.055 ppm  
 F1 22391.77 Hz  
 F2P -8.720 ppm  
 F2 -1096.56 Hz  
 PPMCM 9.33872 ppm/cm  
 HZCM 1174.41626 Hz/cm

SID 22 oct 2014  
SID-BCN

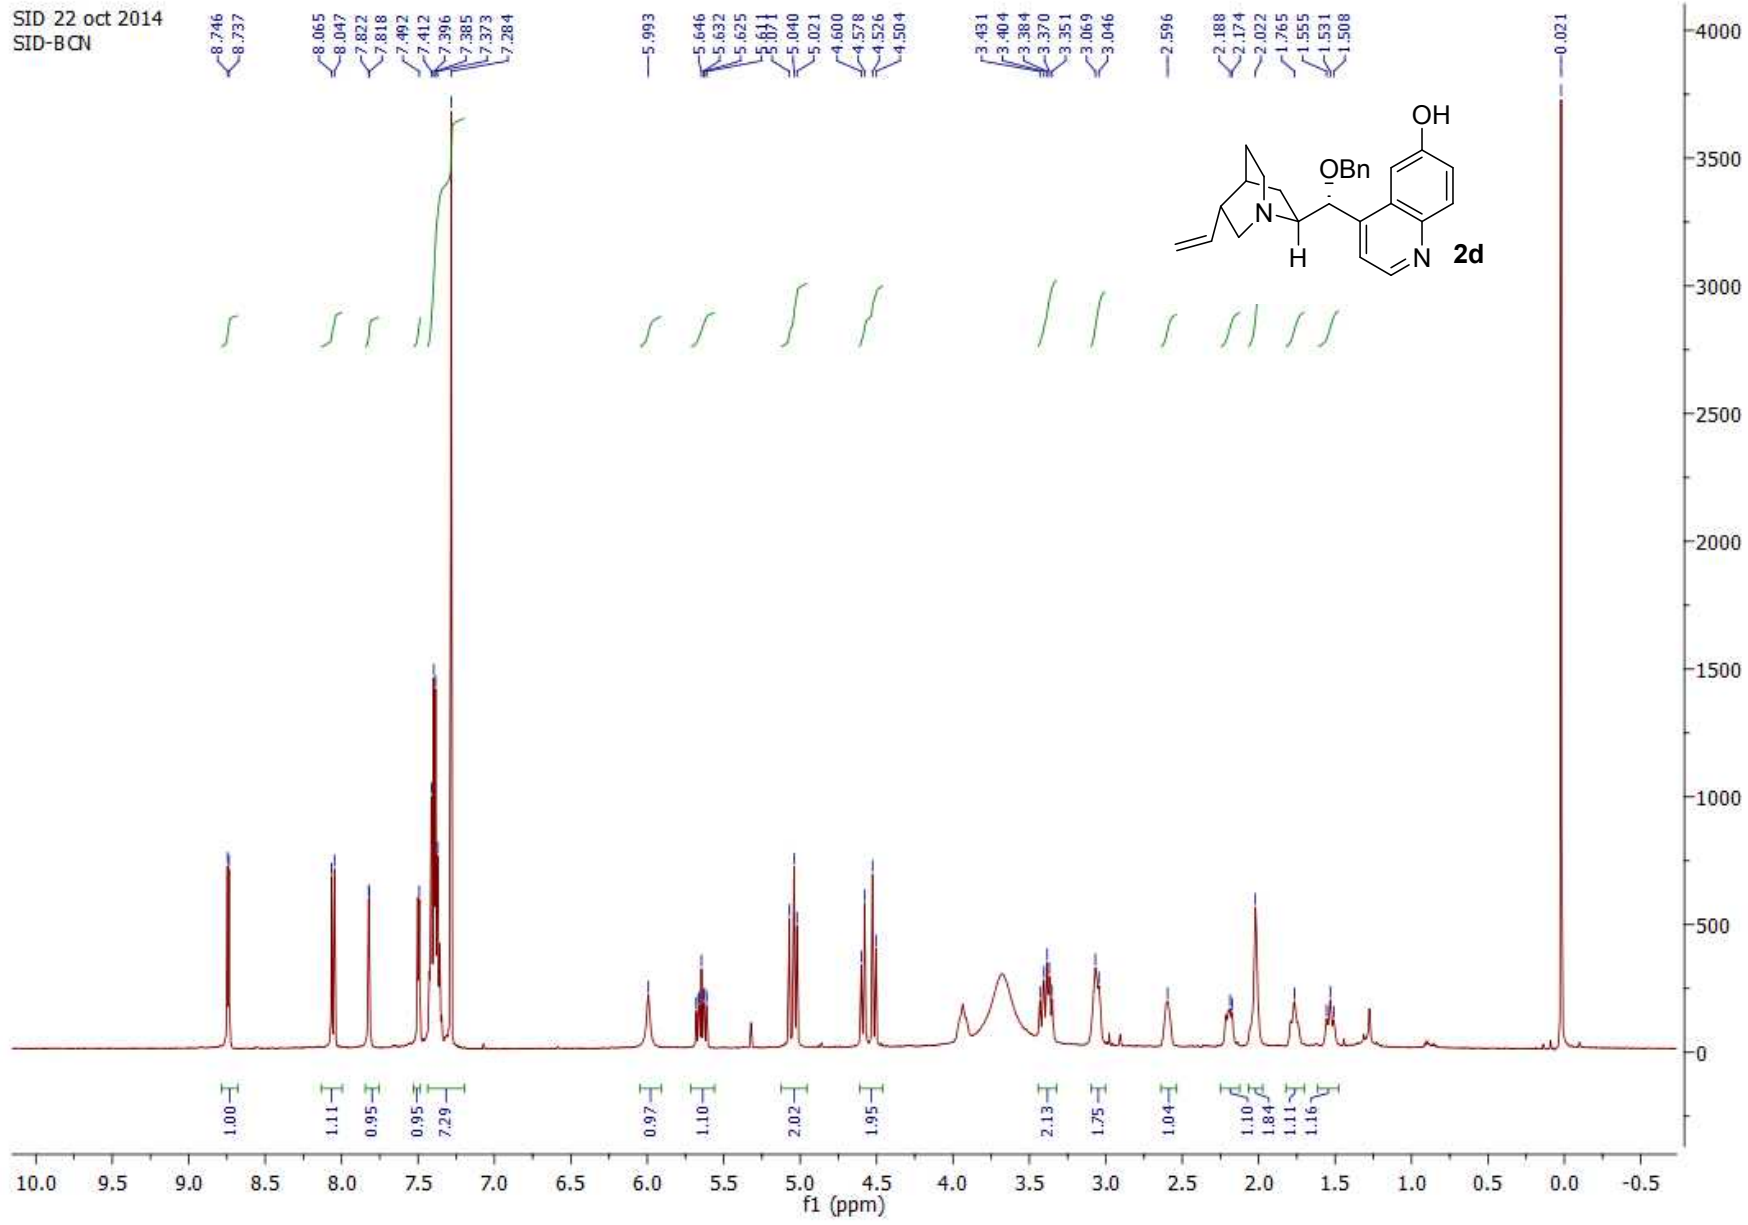



C:\WINNMR98\Z\_JASBIR\nbbcd.als

Bn CPN

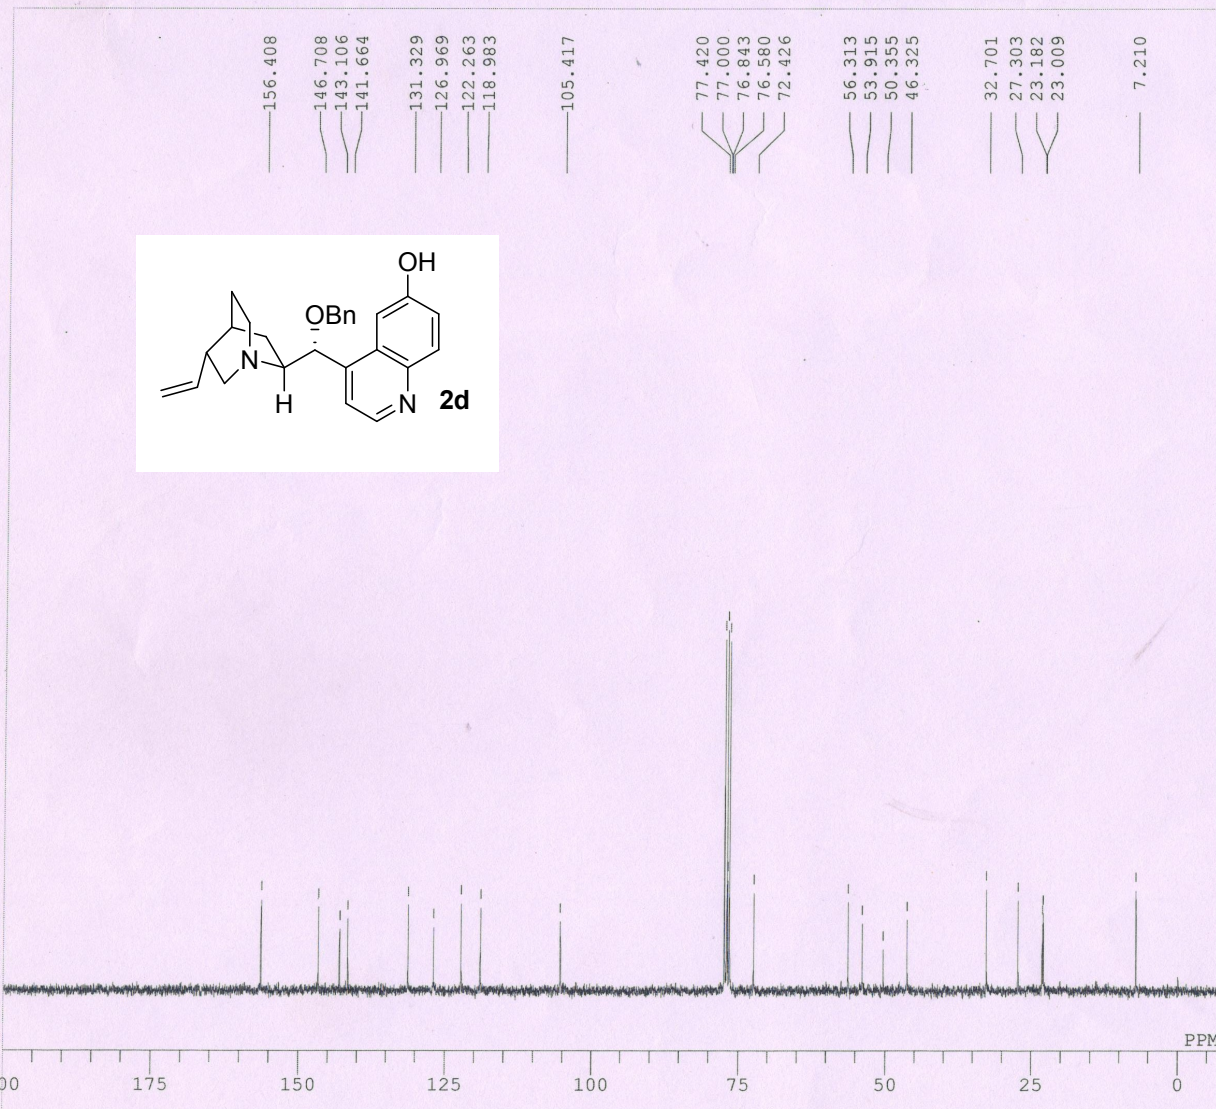

DFILE C:\WINNMR98\Z\_JASBIR\nbbcd.als  
OBNUC 13C  
EXMOD BCM  
OFR 75.45 MHz  
OBSET 124.00 KHz  
OBFIN 1840.0 Hz  
POINT 32768  
FREQU 20408.1 Hz  
SCANS 260  
ACQTM 1.606 sec  
PD 3.000 sec  
PW1 5.5 us  
IRN  
CTEMP -204.8 c  
SLVNT CDCL3  
EXREF 77.00 ppm  
BF 1.20 Hz  
RGAIN 24

SID 21 oct 2014  
sid-cati

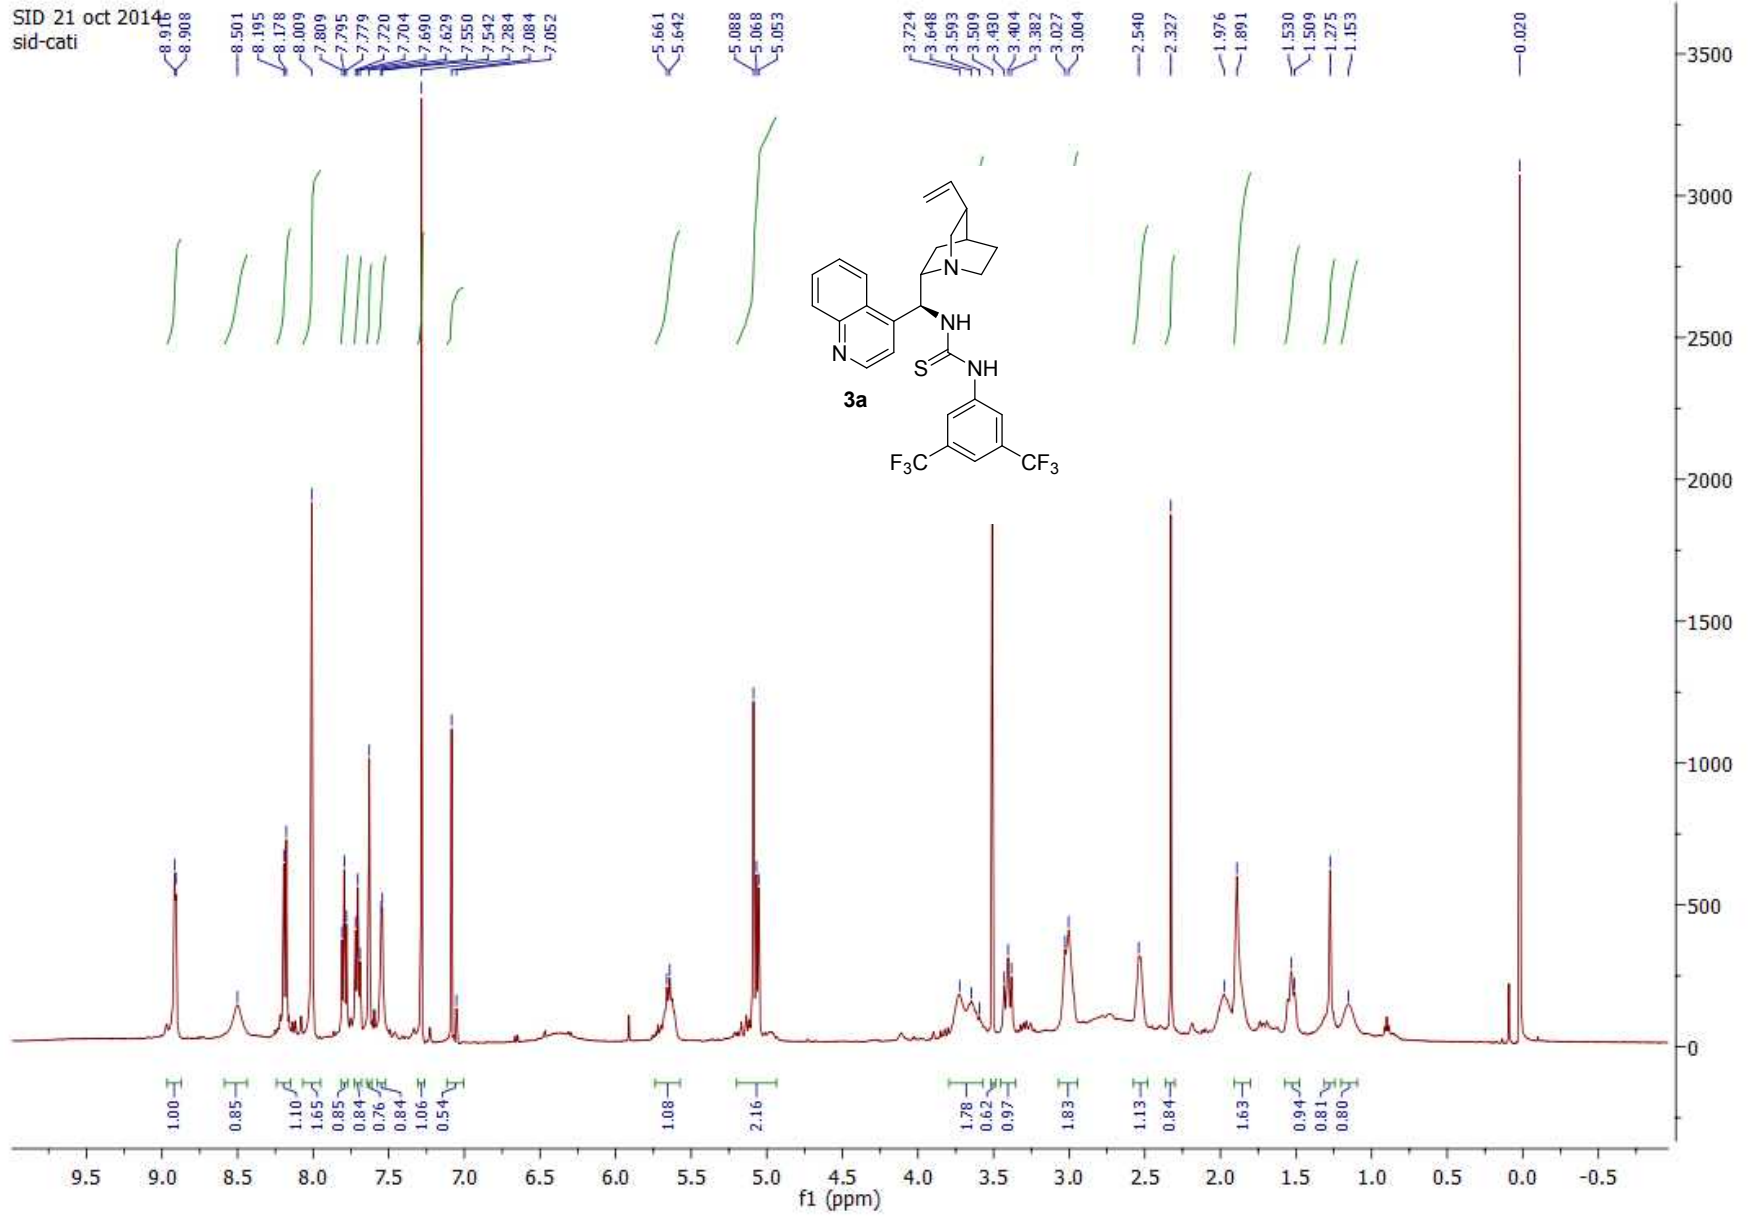

27 october  
JAS-SIM

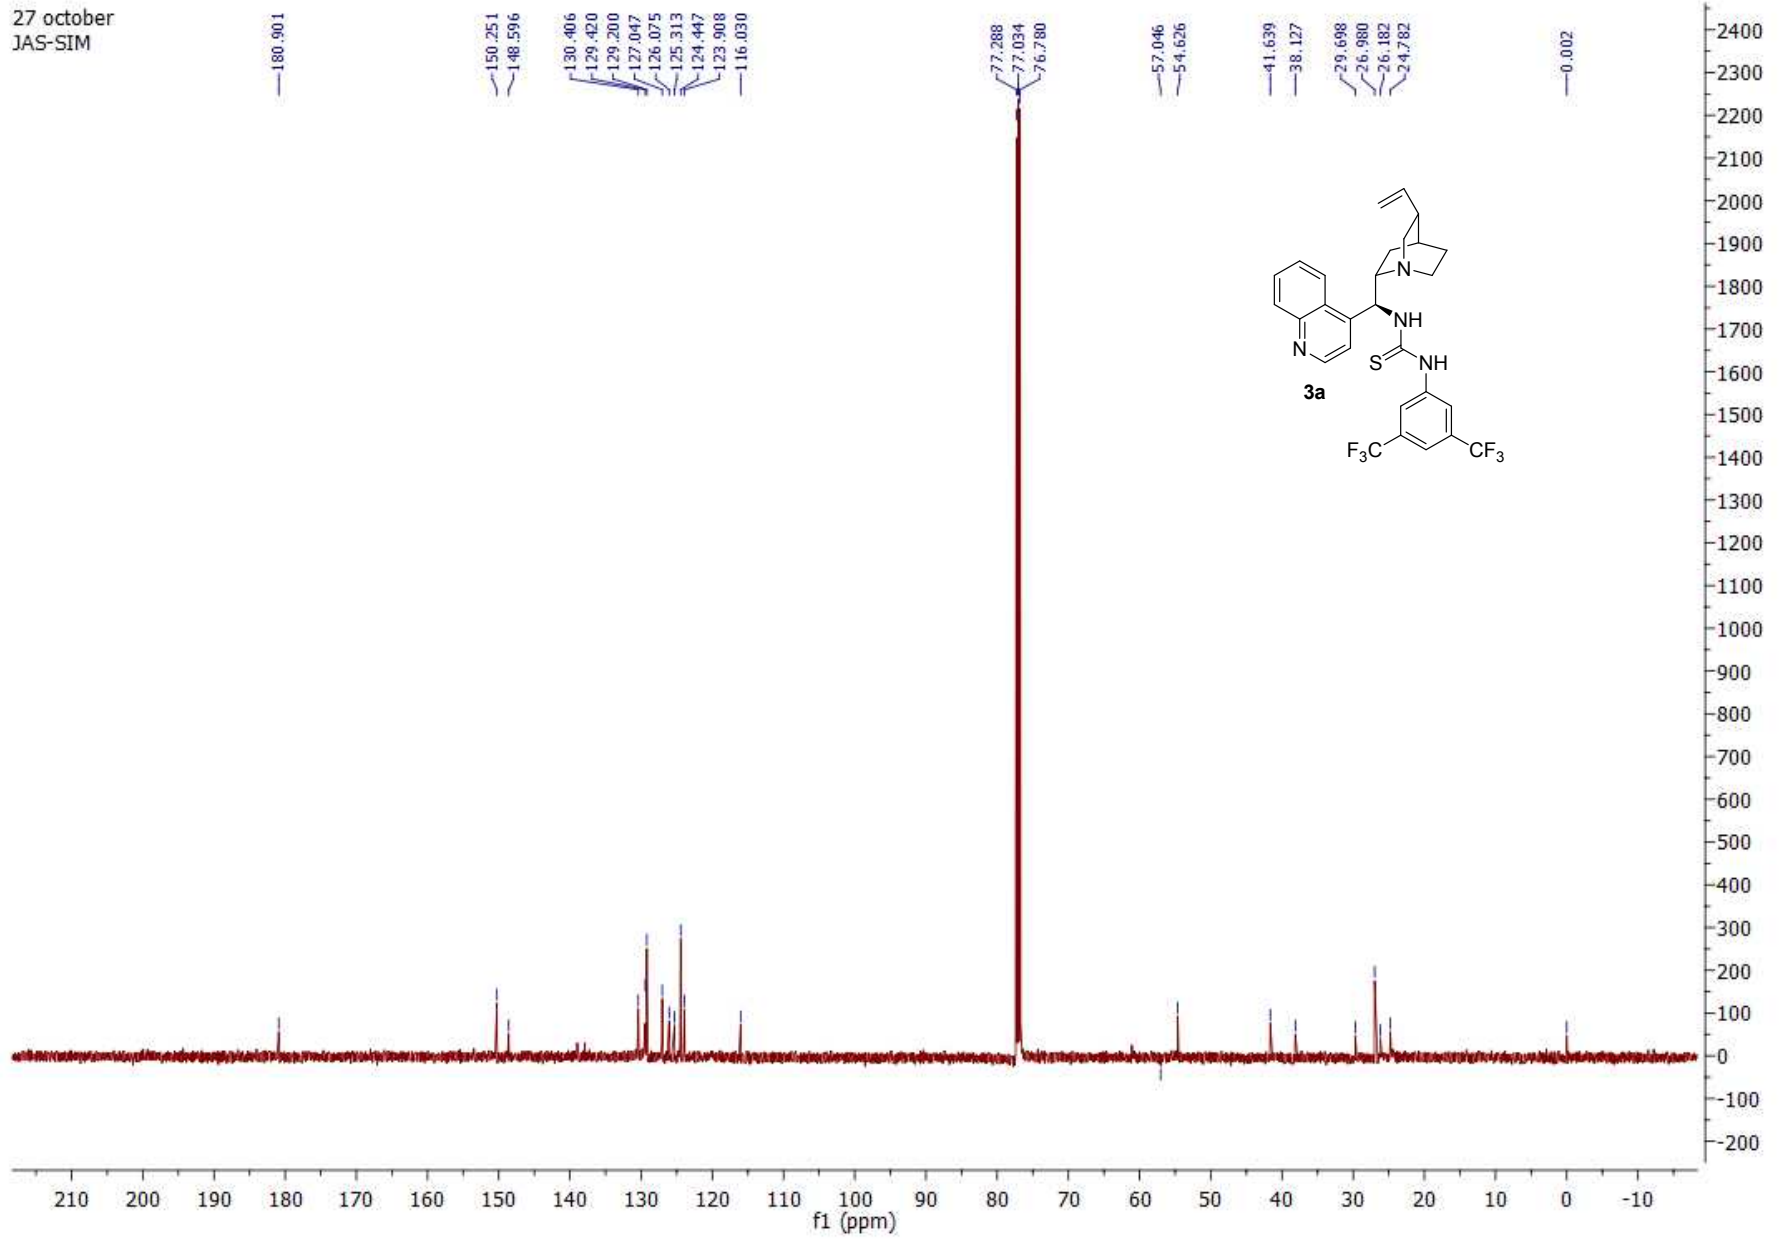

28 oct 2014  
JAS-QNT

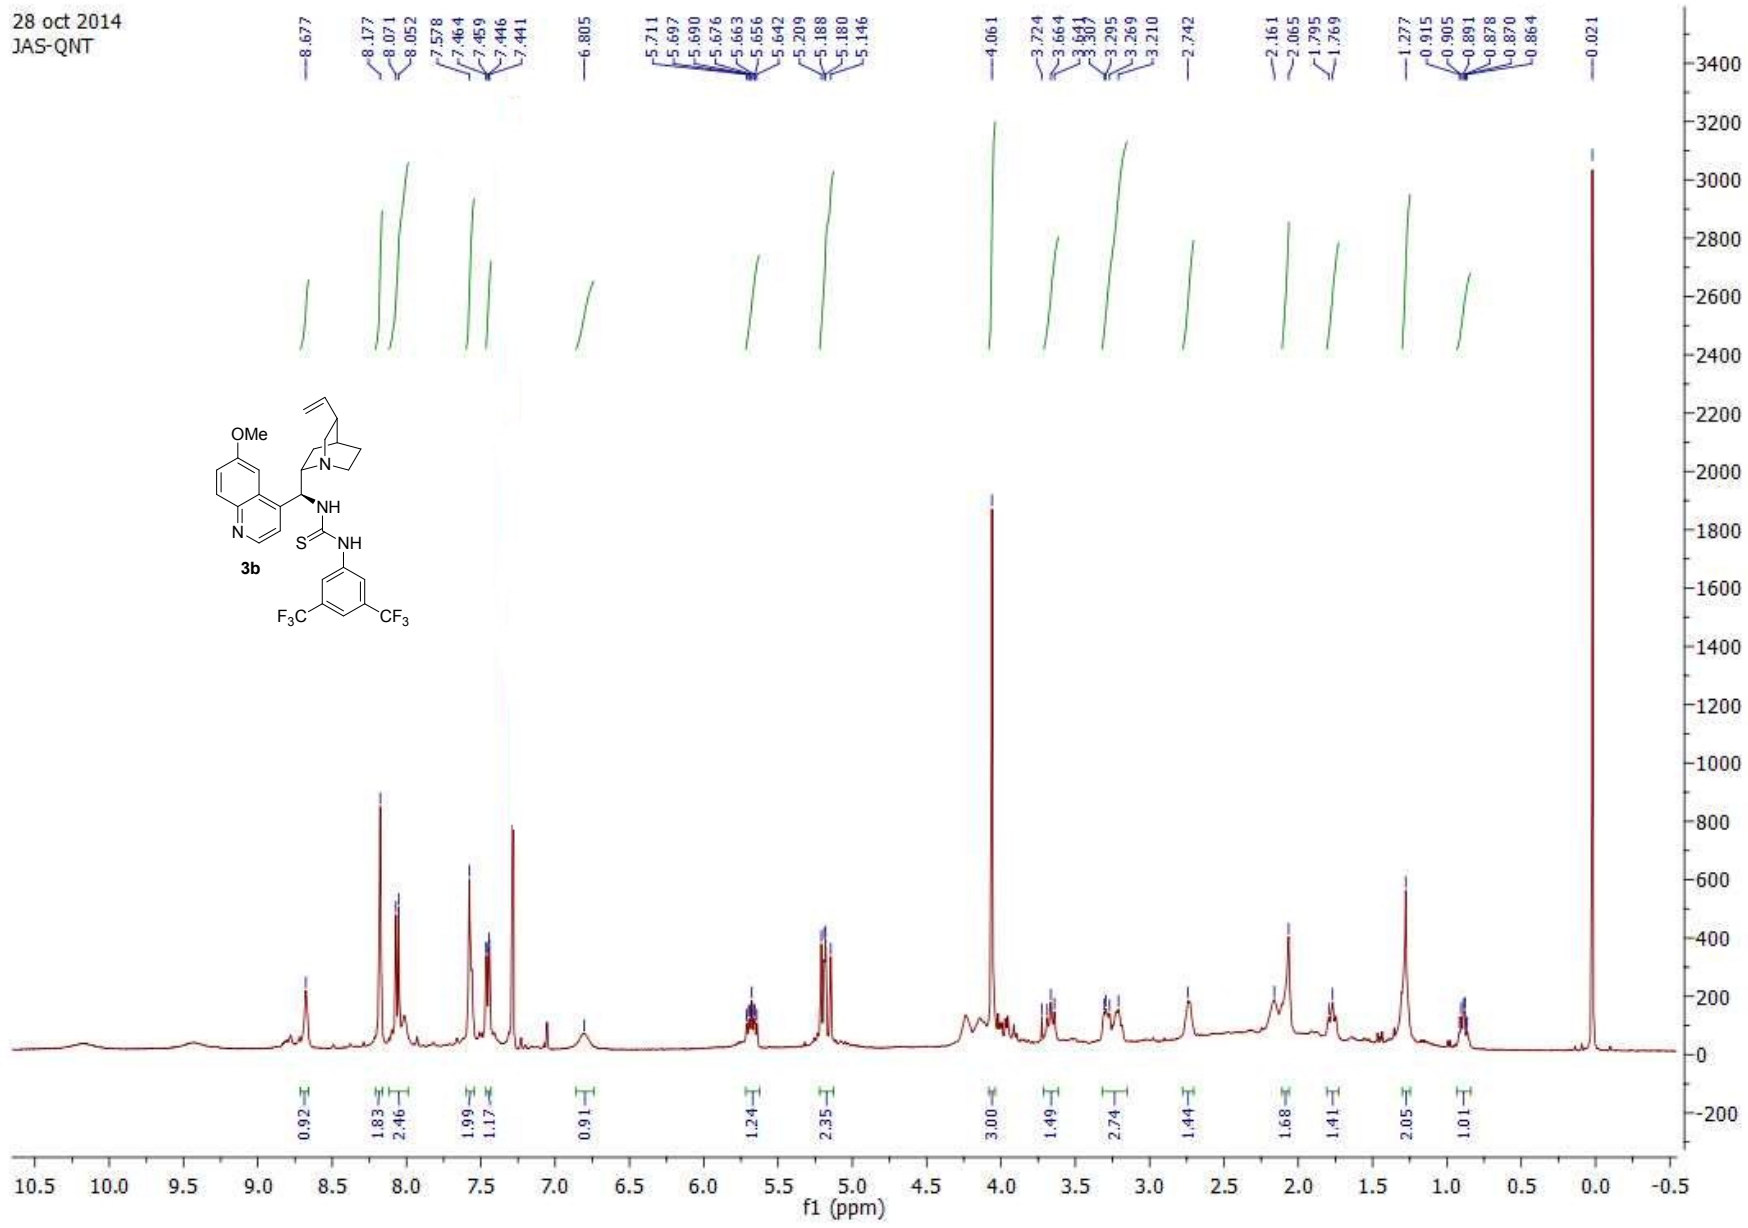

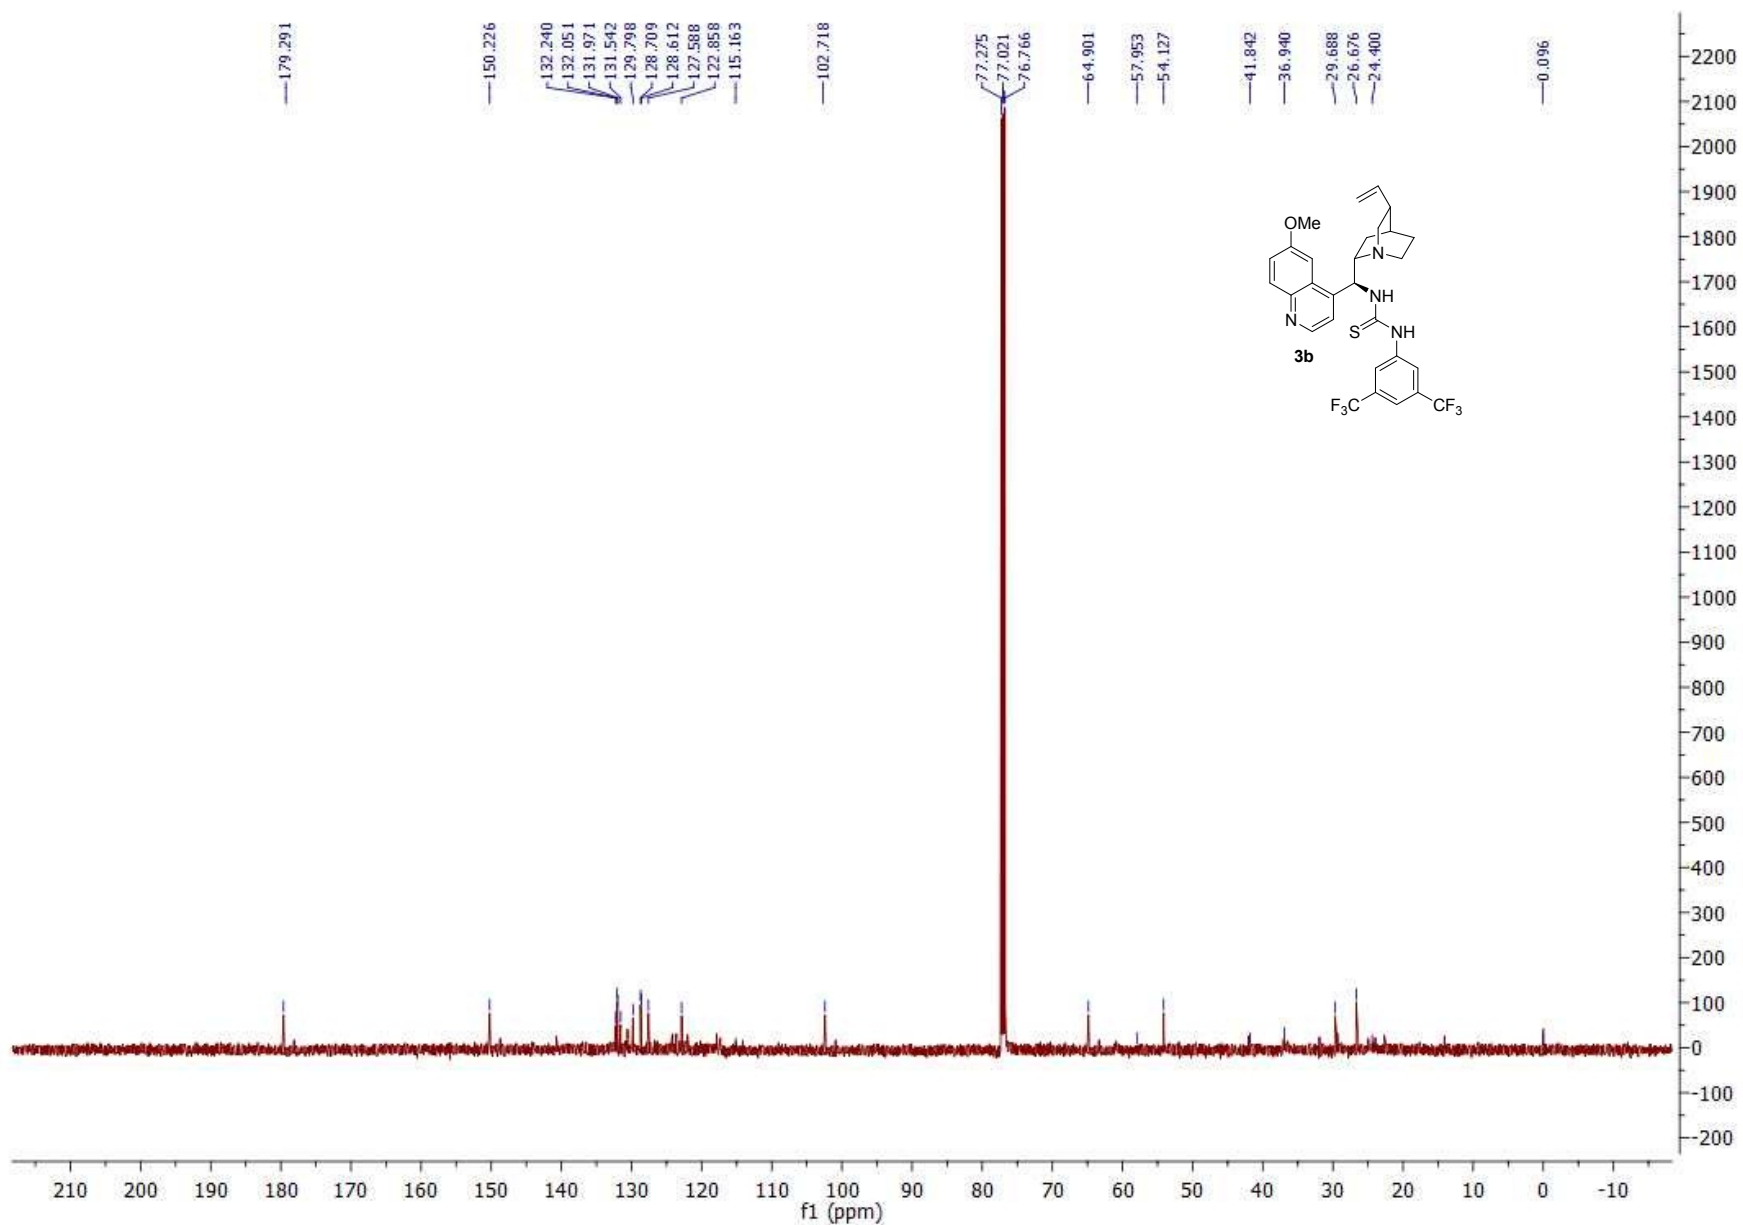

SID 28 oct 2014  
SID-val

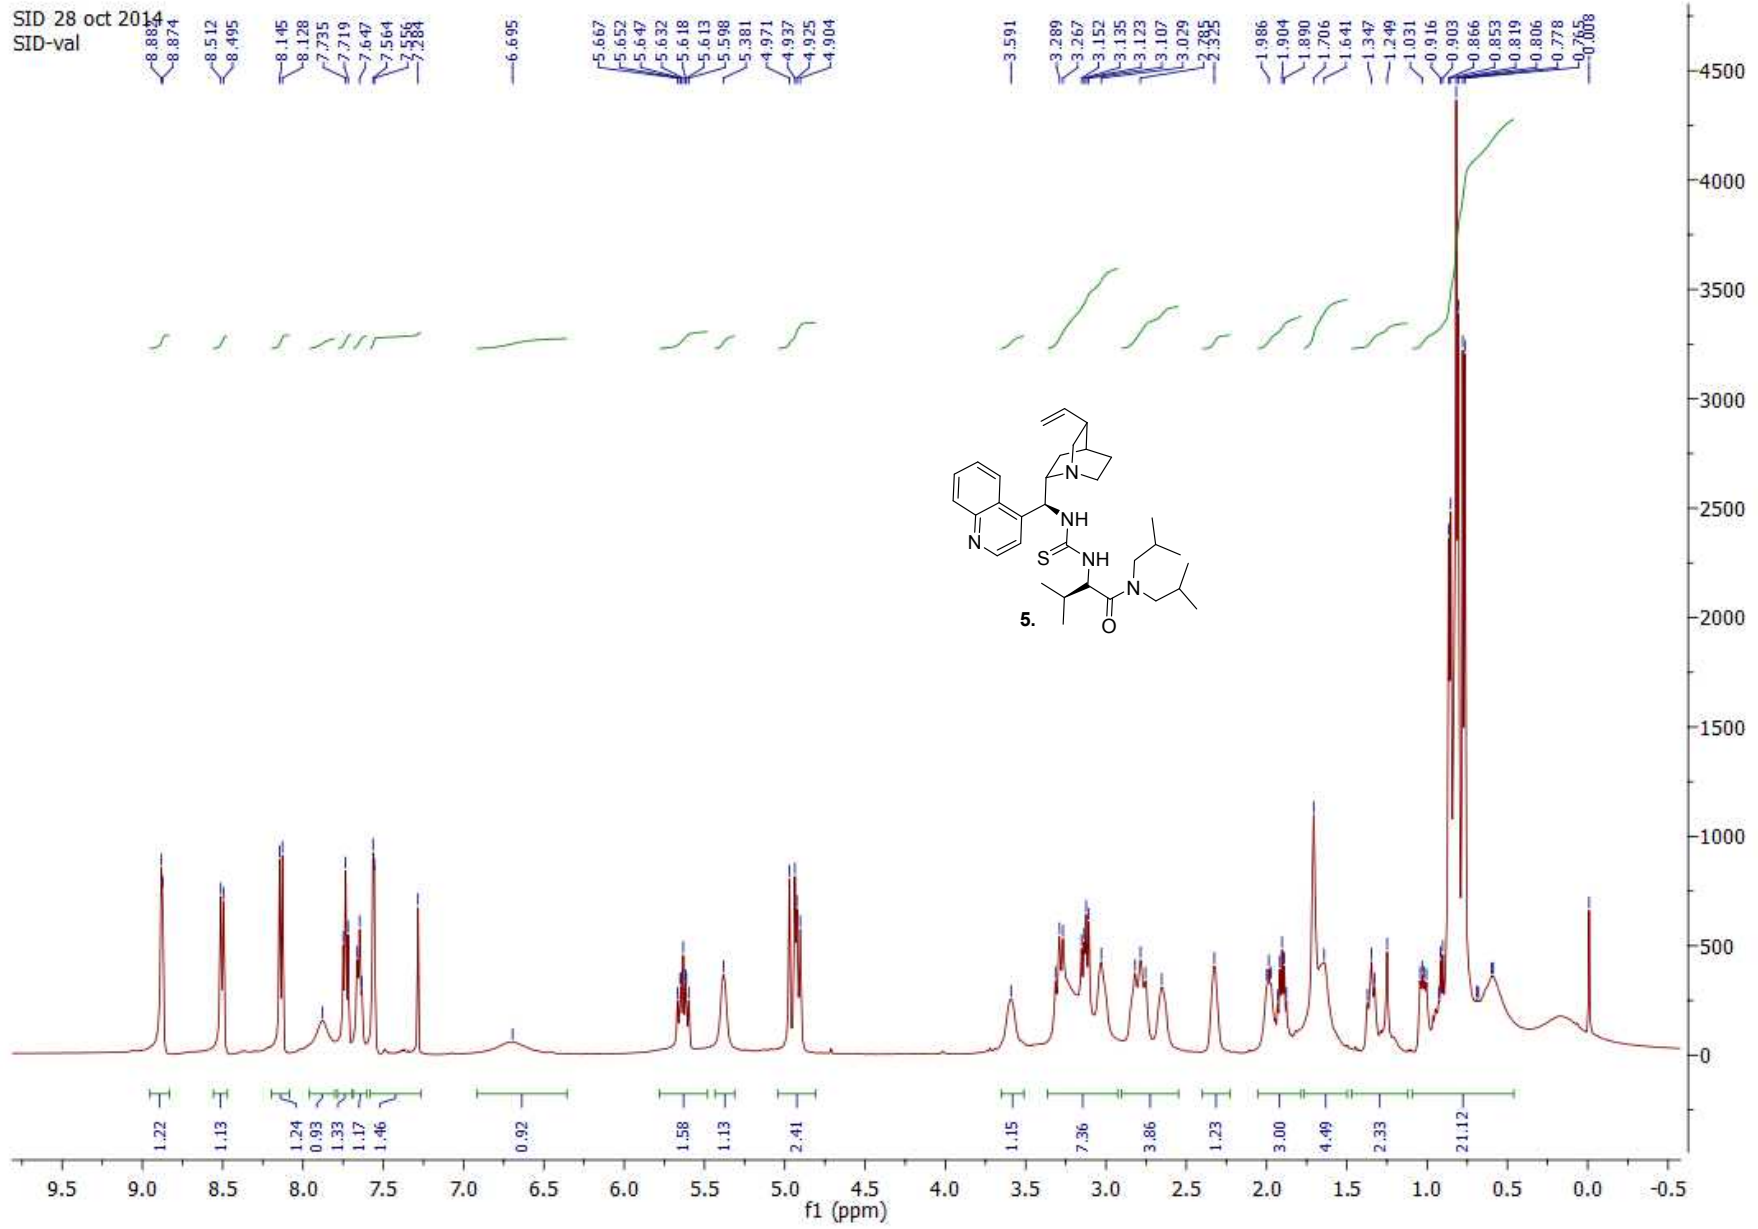

SID 28 oct 2014  
SID-val

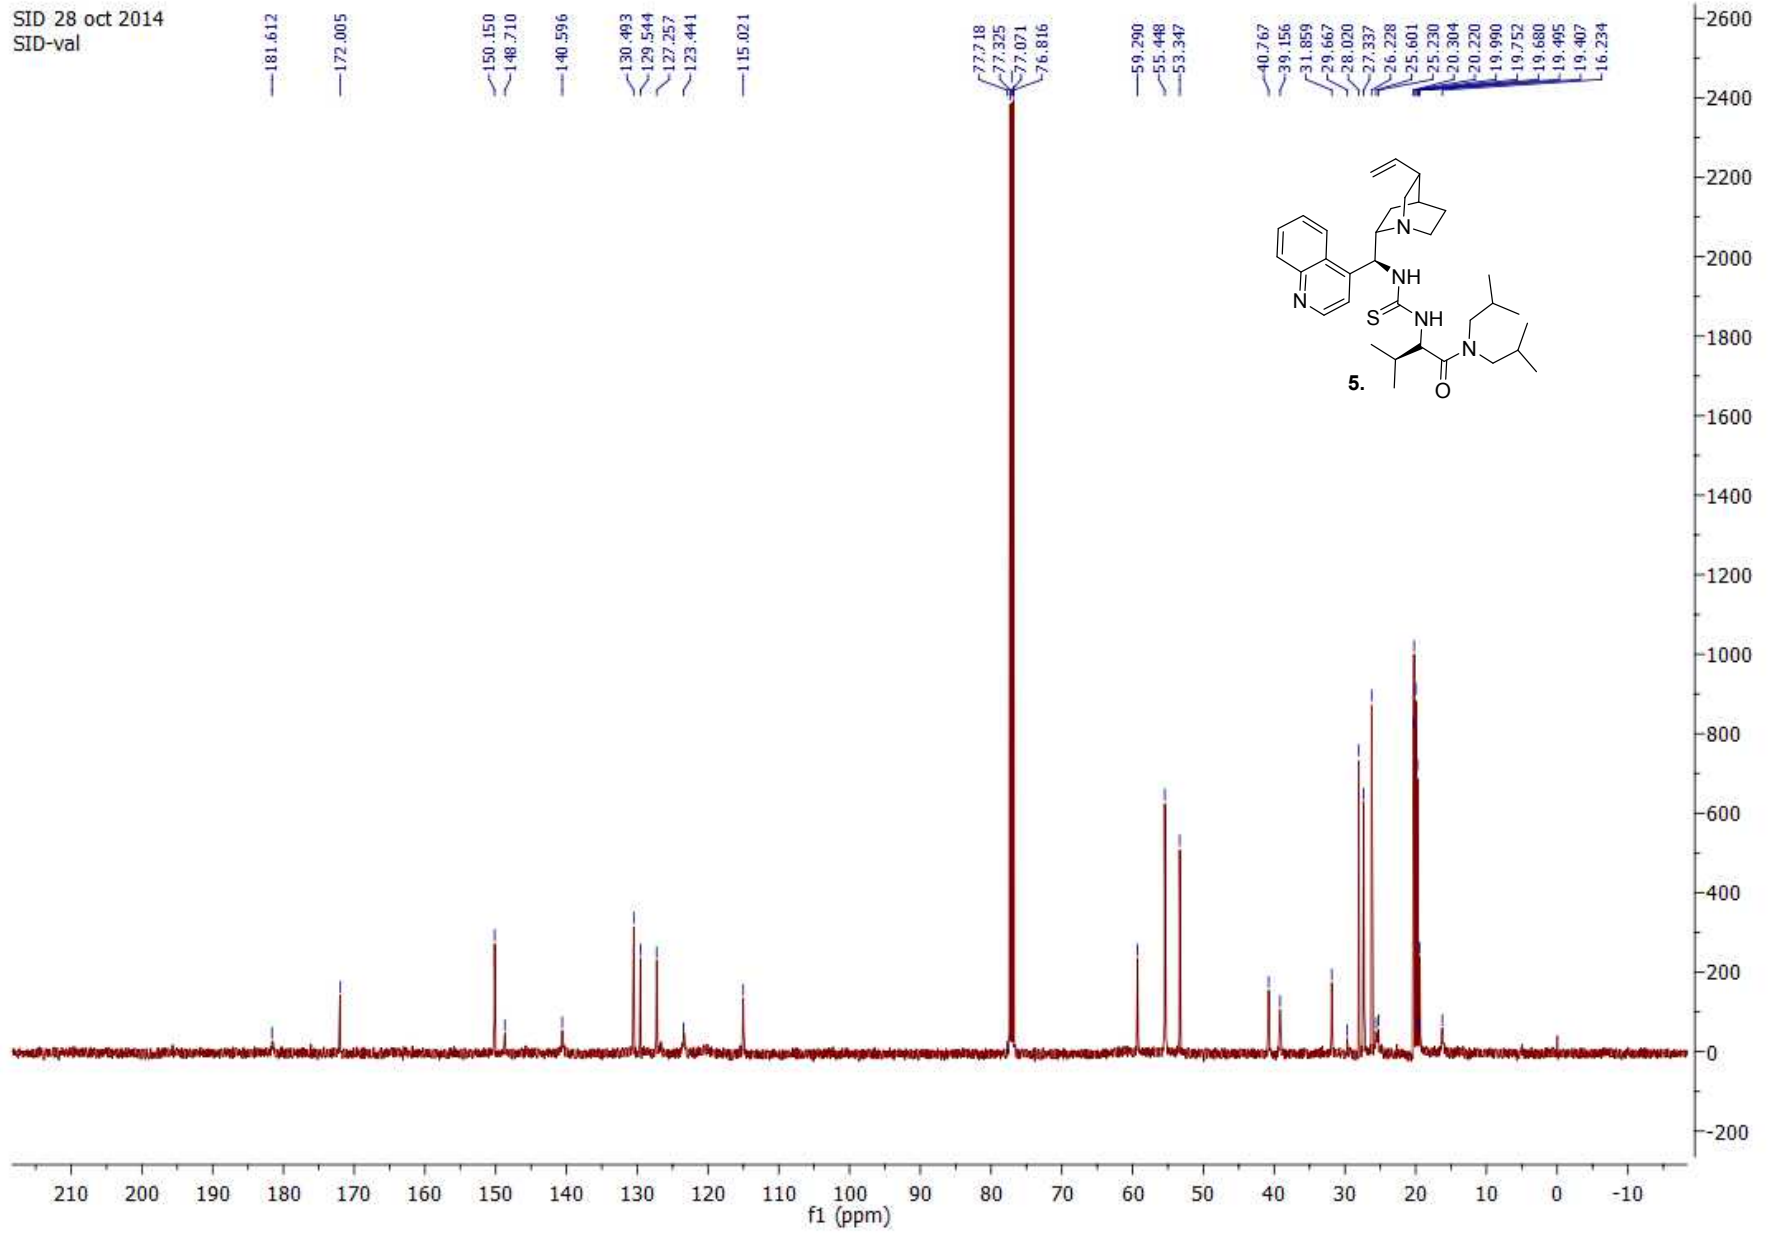

22 oct 2014  
JAS-SIM

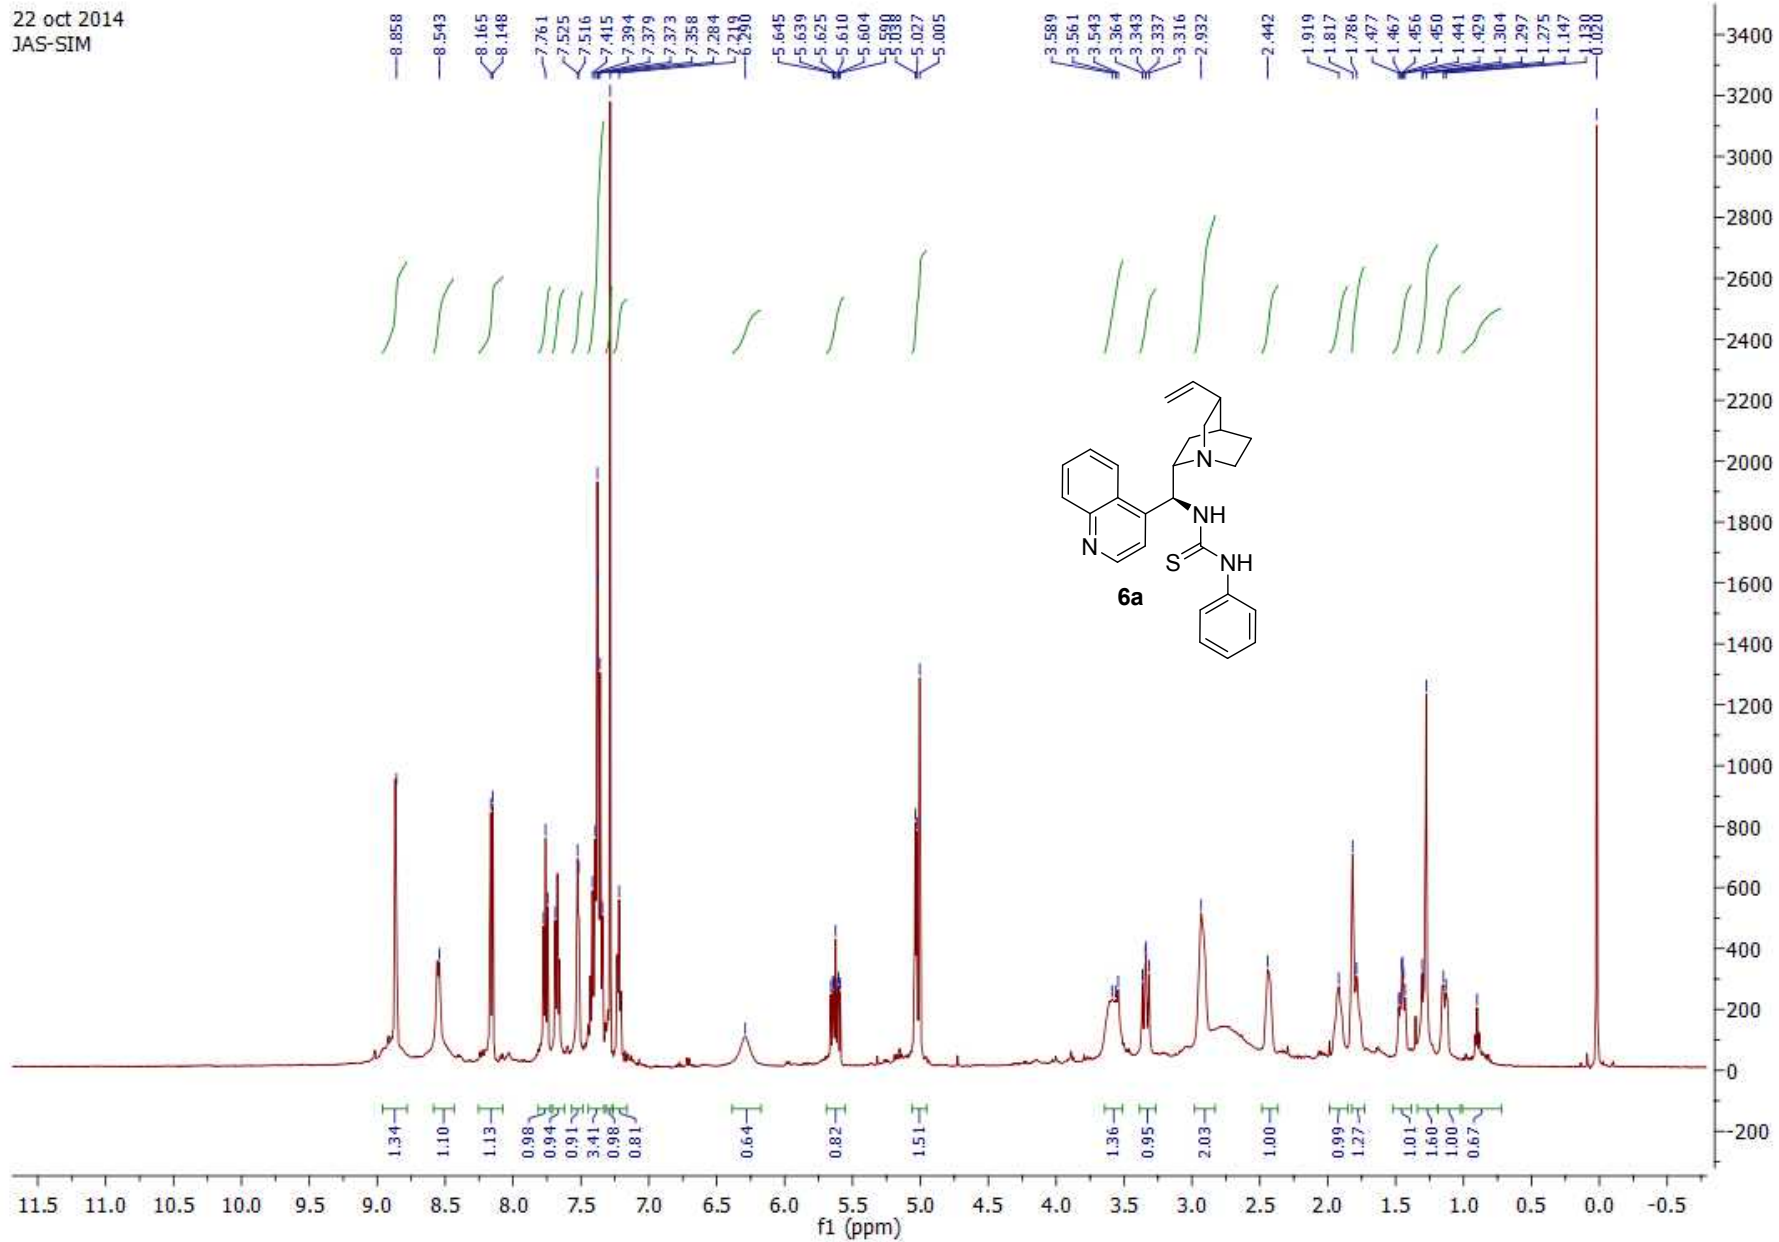



22 oct 2014  
JAS-SIM

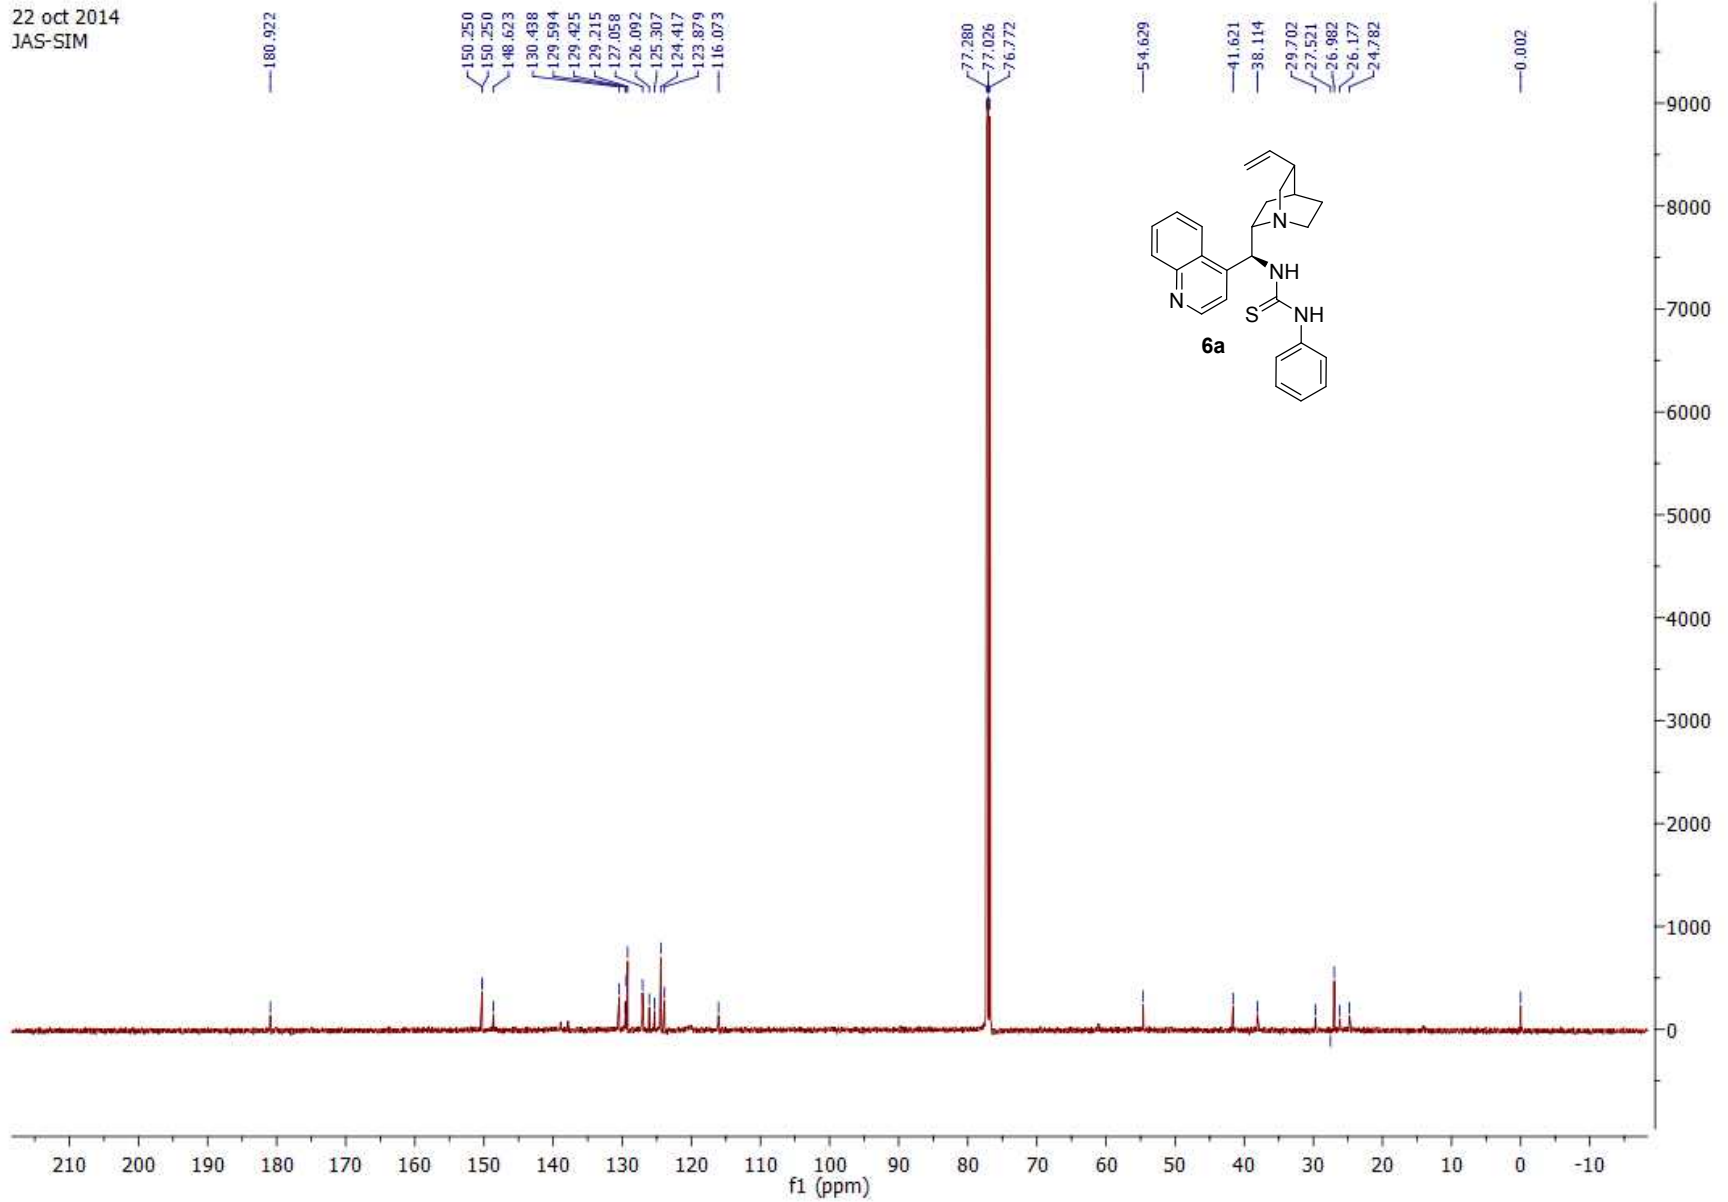

22 oct 2014  
JAS-NO2

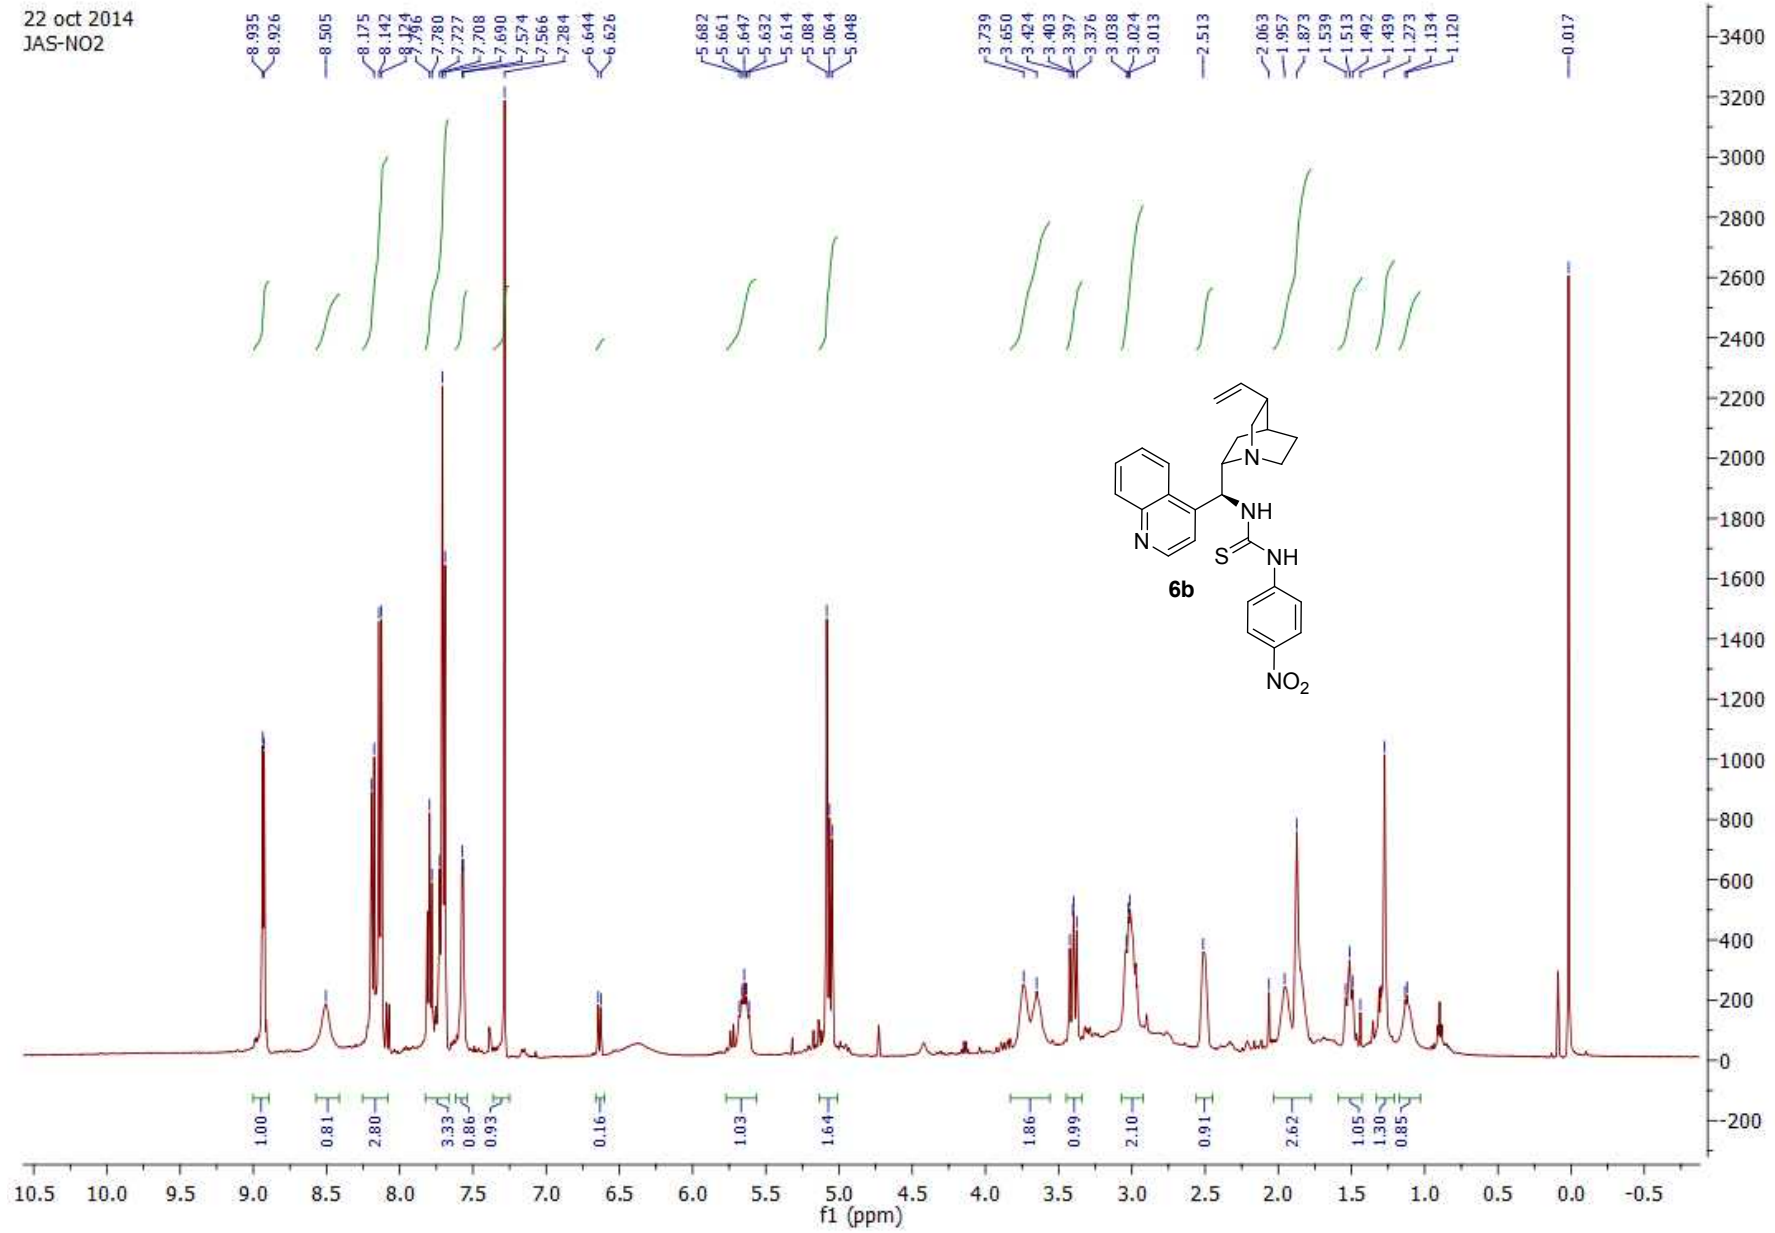

27 october  
JAS-N02

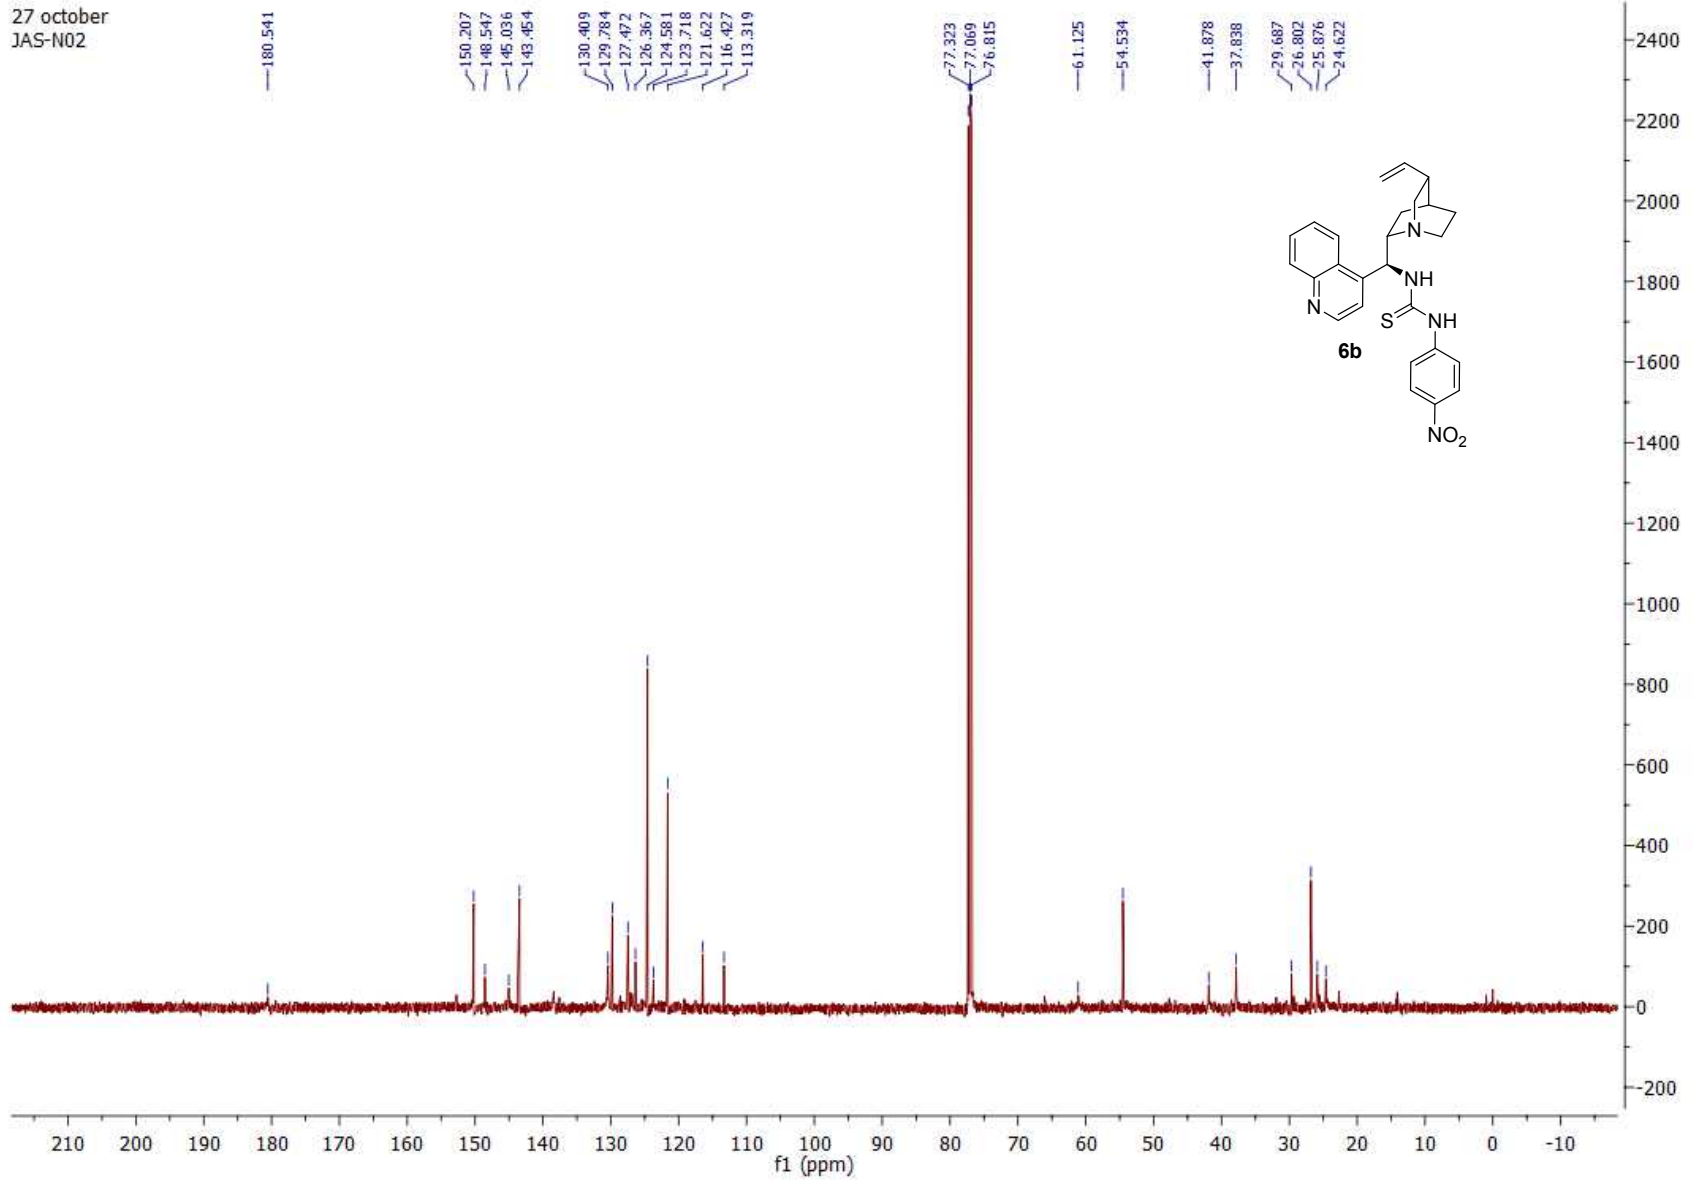

Supplement: c4ra09805f1.pdf [file c4ra09805f1.pdf]
